# Supplementary material
Source: publisher figshare collection journal article supplement (https://gsajournals.figshare.com/ndownloader/files/17774756)
Supplement: Supplementary file 1 [file 17774756]

## Sheet: Three_species_RNA_seq
Table S5. Comparative RNA-seq analysis of orthologs from Ascodesmis nigricans, Pyronema confluens, and Sordaria macrospora.
Conditions analyzed were:
for A. nigricans: total sexual mycelium (sex), total vegetative mycelium (veg), and young fruiting bodies (protoapothecia, proto).
for P. confluens: total sexual mycelium (sex), two growth conditions that lead to only vegetative mycelium (DD and vegmix), and young fruiting bodies (protoapothecia, proto). Data from Traeger et al. 2013.
for S. macrospora: total sexual mycelium (sex), total vegetative mycelium (veg), and young fruiting bodies of the wild type (protoperithecia, proto). Data from Teichert et al. 2012.
Columns A-C give locus tags from orthologs of the three species.
Columns D-Q give results of an analysis with DESeq2 (log2 fold change and adjusted p-value [padj] for each comparison.
Columns R-AA give mean RPKM values for the analyzed conditions.
A. nigricans (An)	P. confluens (Pc)	S. macrospora (Sm)	log2 FoldChange An proto/sex	padj An proto/sex	log2 FoldChange An veg/sex	padj An veg/sex	log2 FoldChange Pc proto/sex	padj Pc proto/sex	log2 FoldChange Pc DD/sex	padj Pc DD/sex	log2 FoldChange Pc vegmix/sex	padj Pc vegmix/sex	log2 FoldChange Sm proto/sex	padj Sm proto/sex	log2 FoldChange Sm veg/sex	padj Sm veg/sex	mean RPKM An sex	mean RPKM An veg	mean RPKM An proto	mean RPKM Pc proto	mean RPKM Pc DD	mean RPKM Pc sex	mean RPKM Pc vegmix	mean RPKM Sm veg	mean RPKM Sm sex	mean RPKM Sm proto
proteinId100721	PCON_13297	SMAC_08319	-2.16123	NA	0.656711	NA	-1.04875	NA	0.2864	NA	-0.0390257	NA	-2.12806	NA	1.19213	NA	104.736	89.9919	13.1071	17.5034	56.2003	51.7567	46.2682	144.746	77.5077	9.1293
proteinId100937	PCON_01709	SMAC_07046	-4.69108	2.75352e-08	0.377351	0.704338	2.0087	9.35575e-05	-0.903972	0.667452	-0.897175	0.700059	-4.20672	3.01638e-14	0.91906	0.58583	9.84236	6.93595	0.136429	80.9515	12.9004	27.6304	13.3741	186.931	117.849	3.03213
proteinId100976	PCON_01708	SMAC_03883	-5.01173	4.0387e-08	1.45554	0.20727	2.65065	0.00116202	-0.672222	0.999874	-0.273467	0.998971	-1.22744	0.192638	0.372621	0.923113	46.8477	73.0382	0.650713	37.4472	4.23501	7.84838	5.87731	14.709	14.5512	2.58011
proteinId100979	PCON_07337	SMAC_02758	1.06313	0.14987	0.236557	0.865784	0.925733	0.177145	0.107765	0.999874	-0.46407	0.998971	-4.21201	3.86847e-08	0.269935	0.930969	9.79443	6.23991	11.9278	25.336	17.7219	18.4721	12.1658	9.86396	9.49848	0.207953
proteinId101258	PCON_13306	SMAC_00146	0.0882016	0.841667	0.179924	0.792194	-0.13445	0.741737	0.328025	0.999874	0.130184	0.998971	2.55242	5.11837e-13	0.507973	0.667404	19.1338	11.651	11.5558	33.08	56.8399	50.9249	51.2155	17.467	15.6366	45.6196
proteinId101413	PCON_13390	SMAC_06761	2.90548	8.9358e-09	-0.985421	0.136052	1.76064	0.000201526	-0.135341	0.999874	0.248577	0.998971	0.478279	0.39432	-0.320919	0.863765	100.841	26.8297	440.285	234.815	77.199	95.78	104.634	62.8255	94.9533	74.0714
proteinId101524	PCON_06459	SMAC_02912	1.23292	0.0126741	0.0708536	0.949686	-0.861155	0.066993	0.0511587	0.999874	0.429491	0.998971	0.469455	0.369027	-0.00216808	0.998035	46.0282	25.8946	62.1808	15.3574	35.8659	39.0041	48.5465	59.5236	73.9504	49.5523
proteinId101940	PCON_04388	SMAC_07841	-0.026128	0.979493	-1.00343	0.333747	-1.0673	0.147954	-3.56935	1.44633e-05	-1.83516	0.128771	-0.748933	0.362559	-0.179213	0.966859	49.8261	12.9587	27.7023	68.5818	14.1801	209.9	51.134	10.1542	14.0921	3.72726
proteinId102148	PCON_09725	SMAC_06969	-5.53436	9.10286e-12	-0.909636	0.105295	2	1.61656e-07	0.180557	0.999874	-0.0705384	0.998971	1.42385	0.0662733	-1.50511	0.638121	26.2011	7.46215	0.22782	120.253	42.3846	42.1042	36.8267	0.158928	0.162711	0.488461
proteinId102176	PCON_03099	SMAC_03707	1.67418	0.00629911	-0.238403	0.840472	2.51347	3.65739e-06	-0.0456154	0.999874	-0.0387872	0.998971	-0.478804	0.472118	-0.0460371	0.99246	47.6226	21.6005	88.7903	138.619	28.7154	33.4732	29.8891	14.5	17.6313	6.08193
proteinId10231	PCON_02587	SMAC_01826	0.302135	0.622729	0.244894	0.809045	-1.0449	0.0470565	-0.0015299	0.999874	-0.28262	0.998971	0.0211158	0.973734	0.0597664	0.986822	98.3059	63.2236	69.2632	14.3765	37.6194	42.4099	31.9584	32.3058	37.4692	21.3024
proteinId103452	PCON_13707	SMAC_04971	-0.256538	0.566398	-0.975089	0.0372123	0.0731924	0.87252	-0.278127	0.999874	1.1713	0.0267652	-0.625674	0.12534	0.696123	0.535623	91.902	25.0409	43.5815	45.1765	43.7358	59.8914	124.755	120.697	91.2089	29.258
proteinId103593	PCON_11054	SMAC_07072	-1.16134	0.00141425	-0.667694	0.140925	2.30842	6.48489e-14	-0.919611	0.0899648	-0.698793	0.349021	1.01329	0.00419405	-0.192358	0.897232	44.9286	15.0437	11.3316	412.451	54.0889	116.154	65.3816	19.1631	26.4423	27.7516
proteinId103940	PCON_08588	SMAC_05140	-1.58299	3.17628e-05	0.226211	0.735101	-0.263764	0.515073	0.028951	0.999874	0.0606349	0.998971	2.10203	1.80396e-08	0.457921	0.732486	143.613	90.3753	27.0939	66.4199	101.468	112.07	107.439	19.9231	17.7099	38.2239
proteinId104339	PCON_09514	SMAC_02570	1.68765	5.6136e-07	-0.277339	0.635435	2.47502	1.43273e-17	0.279319	0.999874	0.532491	0.677792	-1.78749	3.04047e-06	0.593504	0.564047	17.9844	7.92529	33.1532	116.673	31.4434	29.183	38.8519	12.7363	11.3064	1.54323
proteinId105763	PCON_12197	SMAC_02678	0.490461	0.283693	-0.185791	0.81697	0.307807	0.489059	0.00654484	0.999874	0.114984	0.998971	1.94254	3.02689e-06	0.464307	0.762972	114.962	54.3342	91.9152	83.8055	84.1346	94.4623	93.8424	29.2665	29.7748	56.4767
proteinId105766	PCON_02787	SMAC_06222	0.617199	0.457876	-0.373188	0.787963	0.172077	0.840435	0.129852	0.999874	-0.113943	0.998971	-3.06307	3.26176e-05	0.807062	0.762972	32.2507	13.2354	28.2708	140.385	170.366	175.401	148.707	131.305	89.8364	5.49436
proteinId10596	PCON_08657	SMAC_04607	0.186936	0.724739	-0.346171	0.645091	-0.955099	0.0278419	-0.103383	0.999874	-0.41962	0.998971	-1.448	0.0017824	0.0140717	0.995399	16.0973	6.76808	10.4536	9.78327	21.915	26.5567	18.1322	8.38623	10.3219	2.01433
proteinId106237	PCON_13335	SMAC_02237	-3.51326	5.21597e-09	-1.92559	0.00433241	0.0971239	0.887628	-0.22115	0.999874	-0.0766338	0.998971	1.16675	0.0546321	-0.770691	0.688515	34.7264	4.69229	1.59131	59.2324	59.0091	77.8331	67.4698	16.4548	38.9873	40.784
proteinId106586	PCON_10413	SMAC_08444	1.77161	0.00220994	-0.659397	0.43404	0.0695062	0.916496	0.387284	0.999874	0.0825348	0.998971	-0.484889	0.441168	-0.0680137	0.986449	45.5904	15.4118	91.2928	90.0976	140.327	120.245	117.245	37.892	49.7832	19.5711
proteinId106591	PCON_04993	SMAC_02808	0.536361	0.292002	-0.932177	0.117902	2.48909	1.19945e-09	0.0665239	0.999874	0.263079	0.998971	0.140837	0.797679	0.0646288	0.982421	33.3321	9.36079	27.9036	463.658	106.413	114.446	126.331	13.2457	15.448	9.06604
proteinId10677	PCON_04648	SMAC_06514	2.18747	0.0104621	-0.870476	0.481725	-4.3829	5.34636e-08	-0.326056	0.999874	-0.109383	0.998971	-8.63331	3.14235e-16	0.614821	0.841038	50.6963	14.3946	140.081	0.478179	11.278	16.1216	13.6728	74.8432	58.9995	0.01868
proteinId107091	PCON_08869	SMAC_03913	-0.372614	0.665069	-0.305212	0.83382	-4.41934	8.67785e-11	-0.890352	0.979684	-0.631854	0.998971	4.25996	3.09885e-09	0.107879	0.982337	16.2662	6.98272	7.02968	2.24044	33.6461	72.0622	41.8884	16.3365	19.2081	235.784
proteinId107441	PCON_08372	SMAC_07883	0.0959713	0.880758	1.14188	0.074234	-0.686478	0.186327	1.00059	0.413924	0.349706	0.998971	-2.71422	2.01322e-07	0.186814	0.940754	43.8245	51.9317	26.0526	81.2215	333.082	185.077	217.663	19.771	21.131	1.59095
proteinId107675	PCON_08375	SMAC_00102	-2.78833	5.06982e-05	0.723347	0.449816	0.68598	0.3058	0.226282	0.999874	0.157337	0.998971	0.715004	0.308201	-0.641786	0.784322	23.4439	21.0302	1.77416	66.7324	60.6568	58.177	59.8338	21.7844	45.7137	41.4992
proteinId107892	PCON_08373	SMAC_03597	-0.498961	0.728635	1.98082	0.231046	2.43367	0.0482467	0.352828	0.999874	0.219313	0.998971	3.12236	0.0120843	1.13228	0.804245	9.21342	22.9289	3.5512	2.6352	0.546872	0.460737	0.500428	94.1002	49.3009	235.379
proteinId108052	PCON_01083	SMAC_00232	-2.71021	4.56214e-08	1.25774	0.0230024	0.137553	0.855636	3.68176	5.13328e-11	3.9239	1.74308e-12	0.77499	0.114108	-0.141486	0.956117	26.4932	34.5581	2.22347	0.574184	7.78218	0.632719	9.56104	23.0694	34.6933	30.1916
proteinId10807	PCON_08560	SMAC_04429	0.549324	0.255177	0.167654	0.849341	0.33155	0.477105	0.11608	0.999874	0.451685	0.998971	-4.92645	3.26917e-14	-0.860156	0.504797	30.8228	18.6108	25.5813	38.7828	41.7882	43.455	54.5271	7.25498	15.5429	0.225714
proteinId108446	PCON_05785	SMAC_06641	-2.95226	2.14571e-05	1.03924	0.262714	0.0494993	0.95024	0.920062	0.889518	0.588033	0.998971	-0.720025	0.329162	-0.97073	0.662986	79.4049	89.6087	5.32411	86.7966	202.408	118.044	165.016	84.7682	189.07	66.933
proteinId108482	PCON_05786	SMAC_06640	-0.24076	0.753946	2.36023	0.00123102	-0.461082	0.515309	-0.0384472	0.999874	0.495028	0.998971	-0.626097	0.382043	0.421954	0.859021	1325.38	3857.7	640.565	38.3493	63.7281	73.9562	96.7105	487.376	492.519	167.701
proteinId108509	PCON_12466	SMAC_06648	-2.39396	7.56629e-06	0.167557	0.876817	-3.15724	3.01834e-11	-0.286704	0.999874	-0.449589	0.998971	2.82394	3.41298e-08	-0.154324	0.958257	49.8408	29.7191	5.11847	8.81121	82.109	113.498	75.7291	87.149	113.775	458.842
proteinId10853	PCON_02124	SMAC_06124	1.25739	0.0293008	-0.60949	0.456092	-4.10474	1.33851e-14	-0.0721759	0.999874	-0.290602	0.998971	-0.546457	0.365807	0.451858	0.822807	60.8375	21.1842	83.7145	1.77588	36.2778	43.0332	32.1624	96.7239	84.889	28.0107
proteinId108559	PCON_12489	SMAC_06645	0.21669	0.733375	-2.39091	9.53511e-05	0.0402404	0.94863	0.449573	0.999874	0.496115	0.998971	2.0163	0.000164216	-0.320539	0.87638	17.0853	1.65825	11.1596	44.4977	73.0765	59.9049	78.0459	17.1554	25.8514	59.547
proteinId108836	PCON_10072	SMAC_02642	1.49336	0.0140485	-0.675908	0.432864	1.19941	0.0339897	0.0158144	0.999874	0.0159985	0.998971	3.0782	9.25716e-08	0.572691	0.788469	115.515	38.3392	189.133	149.025	80.7106	90.0932	83.5412	121.636	102.508	424.748
proteinId109023	PCON_09343	SMAC_03938	-0.96557	0.273185	-1.09726	0.325594	0.756597	0.363732	-0.012015	0.999874	-0.131021	0.998971	3.21816	4.26084e-05	0.632905	0.828339	6.093	1.4675	1.68728	28.8268	20.7082	23.5267	19.6048	37.8937	29.0321	137.623
proteinId109088	PCON_09335	SMAC_02641	-0.829321	0.319815	0.295037	0.844494	0.402409	0.629845	0.417833	0.999874	0.531806	0.998971	-1.72532	0.025392	-1.2954	0.572056	206.429	136.843	63.7003	352.365	443.957	370.675	499.366	70.7152	222.12	37.3283
proteinId109438	PCON_08801	SMAC_02633	-3.04647	9.07909e-05	-1.10359	0.296047	0.356204	0.677845	0.449641	0.999874	0.105025	0.998971	-1.76593	0.0244573	-0.812075	0.765468	54.1042	13.0154	3.34031	118.263	159.37	129.965	128.556	22.8965	50.8622	8.34422
proteinId109467	PCON_08804	SMAC_04066	-1.00677	0.0569847	-0.18609	0.853069	-1.98293	1.2746e-05	0.390173	0.999874	-0.20099	0.998971	2.41533	6.71934e-07	0.257458	0.902506	6.58595	3.08509	1.82668	7.04932	46.244	39.5323	31.4353	26.3518	27.5229	73.9409
proteinId109658	PCON_09331	SMAC_08360	0.251574	0.740604	-1.70071	0.0286551	0.461392	0.508508	-1.99782	0.0254631	-1.42193	0.25402	-3.65637	4.32147e-08	0.0384973	0.994019	103.115	16.4474	70.1894	128.781	27.7466	130.23	43.4341	74.394	94.995	3.18406
proteinId109881	PCON_10099	SMAC_00139	0.733943	0.426051	-1.18156	0.300288	-1.06197	0.208005	-1.21021	0.798134	-1.05405	0.956698	-0.275649	0.774813	0.416556	0.905437	22.306	5.02713	21.5166	3.23107	3.52415	9.65466	4.05437	22.7923	20.6083	7.70755
proteinId11061	PCON_08587	SMAC_04263	0.735009	0.155526	-1.00271	0.0981411	0.00651147	0.989698	0.510677	0.999874	0.371952	0.998971	2.41646	2.52131e-07	0.424459	0.810127	21.498	5.68918	20.4862	26.7145	47.1716	37.0749	44.3177	38.5503	35.472	92.6196
proteinId110673	PCON_02580	SMAC_00615	0.790349	0.262889	0.519709	0.619197	0.989742	0.119591	0.176893	0.999874	1.70992	0.0778727	-2.06277	0.00125942	1.24125	0.502174	13.4488	10.3999	13.302	13.1343	9.19411	9.14482	28.2812	209.289	102.457	11.4572
proteinId110745	PCON_13836	SMAC_03088	0.492469	0.550955	-0.271395	0.851145	1.22972	0.0822053	-0.322371	0.999874	-0.370406	0.998971	-1.09235	0.152041	0.0290748	0.994019	208.816	92.1117	168.852	239.861	99.3208	140.979	99.181	78.5285	103.458	25.7879
proteinId11110	PCON_10720	SMAC_01615	0.852791	0.0875347	-0.443287	0.546179	0.0283776	0.95849	0.239593	0.999874	0.0396069	0.998971	-1.80571	0.000120526	1.57654	0.0420049	62.2507	24.362	64.2452	25.5845	36.8877	35.1314	33.1979	232.214	93.2847	12.6851
proteinId111383	PCON_13835	SMAC_08570	-0.257326	0.682633	-1.23423	0.0666564	0.962086	0.0562384	0.0829783	0.999874	0.161183	0.998971	-0.863605	0.122311	-0.824123	0.634295	12.415	2.77096	5.79158	24.3019	16.2713	17.2887	17.8069	7.91467	18.4382	4.68189
proteinId112179	PCON_03741	SMAC_01279	-2.54413	1.4592e-05	1.654	0.0140954	-0.936947	0.104362	-0.468764	0.999874	-0.609	0.998971	0.685142	0.270667	0.416467	0.843651	57.7164	99.2727	5.36749	6.34639	10.8623	17.0758	10.163	31.8666	31.1231	26.704
proteinId112287	PCON_01995	SMAC_00236	-4.43862	2.67912e-14	2.00294	0.00186384	-0.0540909	0.935377	-0.373302	0.999874	-0.171489	0.998971	-0.474085	0.455688	0.575424	0.780786	172.168	382.043	4.16439	160.349	159.877	235.058	191.136	562.117	447.29	180.059
proteinId112352	PCON_13862	SMAC_08568	-0.507861	0.378141	0.422943	0.6093	0.194522	0.735661	0.028382	0.999874	-0.140909	0.998971	0.117841	0.847648	0.253332	0.909866	14.2767	10.2386	5.65215	37.2333	41.3969	45.7745	38.0157	17.7148	17.3617	10.2718
proteinId112469	PCON_01985	SMAC_07624	-2.86279	0.000221232	0.695197	0.56373	-0.430007	0.612409	1.06948	0.858485	1.19212	0.746871	-2.83458	0.000229571	0.668408	0.811713	422.065	366.365	29.7075	307.845	1134.71	590.427	1280.84	97.2779	70.4392	4.32947
proteinId112523	PCON_10682	SMAC_03681	-2.6602	0.00102165	-0.182549	0.914647	-0.435217	0.606588	0.383751	0.999874	0.137746	0.998971	-4.39967	2.87701e-08	0.718113	0.799532	11.0098	5.21744	0.896343	18.1476	41.107	35.0838	35.5953	23.7614	17.0905	0.314417
proteinId1139	PCON_08278	SMAC_04937	2.78875	6.11913e-05	0.672775	0.526478	2.33823	0.000273097	0.956615	0.870245	0.928519	0.908987	1.75749	0.0126475	0.0138894	0.995399	1038.4	907.731	4363.6	3449.42	1607.12	911.127	1629.93	276.5	357.696	700.455
proteinId11394	PCON_01030	SMAC_02888	0.941839	0.0158358	0.454736	0.403485	0.359655	0.360214	0.03168	0.999874	-0.0253847	0.998971	1.83494	1.42507e-06	-0.57378	0.654474	44.3977	32.6949	48.8226	43.0408	42.419	46.7623	42.1726	6.97111	11.9185	24.7771
proteinId114732	PCON_11388	SMAC_00770	-3.22402	7.43207e-10	-1.48912	0.0138506	-4.52495	6.78274e-22	2.66279	1.80411e-06	2.16269	0.000270308	0.919509	0.0877136	0.181066	0.942902	41.3182	7.77572	2.37845	1.8858	374.246	64.5097	271.931	22.016	22.8355	21.6055
proteinId115196	PCON_01946	SMAC_05141	-2.4084	7.43989e-05	-0.300223	0.789981	0.579954	0.355875	0.0488684	0.999874	-0.576472	0.998971	3.40163	8.52465e-09	0.568785	0.799532	401.542	174.155	41.3198	306.341	264.081	287.415	175.476	43.9645	39.6459	238.606
proteinId115447	PCON_08776	SMAC_01980	-1.14448	0.0644471	1.3204	0.060381	-0.135685	0.839429	0.240158	0.999874	-0.574701	0.998971	0.725713	0.234741	1.08959	0.504797	19.5903	26.7905	4.90963	19.3312	31.4196	29.8937	18.2494	208.04	118.538	93.3043
proteinId11552	PCON_11867	SMAC_06591	-0.219546	NA	-2.90875	NA	-4.05043	NA	-0.922758	NA	-1.76888	NA	-4.67506	NA	0.93835	NA	39.114	2.47379	18.7949	3.36019	41.1868	91.3401	23.0152	53.1775	33.9298	0.604793
proteinId115591	PCON_05238	SMAC_06220	1.42754	0.0593037	1.24857	0.186971	-0.180207	0.831567	0.420097	0.999874	0.0934082	0.998971	-0.0373528	0.967006	0.442557	0.869365	18.7457	24.563	29.386	16.4191	31.2135	26.0201	25.5976	21.6154	20.9209	11.3243
proteinId115653	PCON_06976	SMAC_01167	-1.76476	0.0120022	-1.0303	0.261526	-0.0976947	0.900751	0.0183293	0.999874	-0.349072	0.998971	3.74414	1.10424e-08	0.606836	0.8059	16.2736	4.18302	2.62048	42.0176	56.8709	63.2888	45.2775	20.6881	16.0481	110.52
proteinId115713	PCON_07856	SMAC_05480	0.0323832	0.977519	-0.318007	0.853069	-1.4293	0.0876108	-0.169398	0.999874	-0.405149	0.998971	-1.8476	0.0342991	1.32718	0.634295	6.91596	2.92771	4.00049	8.31579	25.5403	32.564	22.2142	84.7496	39.9562	4.6571
proteinId117082	PCON_03588	SMAC_02254	-2.70894	NA	0.871008	NA	-0.0347556	NA	0.184118	NA	0.343722	NA	0.162586	NA	0.0864073	NA	29.6064	29.4619	2.47372	187.174	273.848	271.239	317.57	53.403	60.2156	32.9624
proteinId117243	PCON_09998	SMAC_00169	0.789314	0.32029	-2.67769	0.000858549	-2.48537	0.000229535	0.0306182	0.999874	0.24483	0.998971	-1.50129	0.0454904	0.0940089	0.985374	107.701	8.56651	109.475	9.22827	68.102	75.0938	82.1424	24.6867	28.3888	5.07936
proteinId117577	PCON_11117	SMAC_01982	-3.15482	0.000373244	-0.643718	0.651348	1.97499	0.015609	0.232406	0.999874	-0.215532	0.998971	0.0165161	0.986871	0.86069	0.779363	20.2616	6.78746	1.1062	164.867	58.9182	56.0207	43.9884	82.2108	54.157	24.8159
proteinId117661	PCON_10898	SMAC_08960	-2.39344	0.00347846	-1.07504	0.333747	0.431451	0.624237	0.762202	0.999874	2.98588	0.00193911	2.86076	0.000319089	-0.119785	0.981551	101.8	24.1498	9.92065	85.6995	137.203	88.9116	707.293	15.1394	19.5355	87.1306
proteinId119909	PCON_04397	SMAC_00067	-1.38486	0.0116236	0.0528723	0.969603	-0.388	0.490527	-0.297969	0.999874	-0.757536	0.832731	1.92468	0.000238236	-1.81249	0.0355095	94.5825	52.2525	19.9227	248.638	329.684	459.274	246.654	80.8889	375.501	791.195
proteinId119932	PCON_04411	SMAC_00111	-1.62946	0.00728082	2.18201	0.000613242	-0.704129	0.229538	-0.690392	0.989611	-0.8916	0.752024	-0.93471	0.121791	0.469997	0.822807	11.6868	29.1574	2.05695	6.86114	8.58708	15.8297	7.69848	55.7385	49.2795	12.0483
proteinId120074	PCON_03568	SMAC_02183	-1.51186	7.95942e-05	-0.312116	0.606974	2.26435	1.29045e-11	0.175163	0.999874	-0.0941482	0.998971	0.79338	0.0385805	1.11708	0.107029	76.3133	32.9609	15	687.471	199.834	199.206	171.366	617.607	326.905	297.496
proteinId121189	PCON_12677	SMAC_07226	2.39993	8.06272e-10	-4.93346	8.82933e-13	-0.126014	0.776399	0.727075	0.446715	0.382566	0.998971	1.39575	0.00029664	-1.3188	0.0395157	15.9783	0.208355	48.552	61.9346	140.313	95.009	113.987	16.696	53.4725	73.9127
proteinId122207	PCON_05989	SMAC_03602	-0.662944	0.450046	-1.53655	0.122437	-1.52285	0.0437077	-0.435357	0.999874	-0.373624	0.998971	2.94162	0.000145208	0.585385	0.841038	40.2512	7.0402	14.0536	77.2055	210.549	325.103	227.61	126.525	101.028	390.329
proteinId122408	PCON_07826	SMAC_05785	0.929204	0.0814962	0.843318	0.207978	0.342257	0.539033	-0.172561	0.999874	0.248852	0.998971	0.259487	0.658432	1.12072	0.398897	55.9254	54.1101	60.801	16.6457	14.0703	17.9249	19.5845	46.074	26.2191	16.9465
proteinId12244	PCON_06928	SMAC_05302	0.684	0.41413	0.0107684	0.996377	-0.492017	0.545816	0.671892	0.999874	0.230568	0.998971	-2.28695	0.00250381	0.983165	0.684075	33.8758	18.1519	31.1872	14.1954	40.6658	28.2288	30.6054	63.9804	39.0214	3.4213
proteinId12251	PCON_13268	SMAC_01903	0.764185	0.159338	-0.135717	0.900079	-2.59361	2.82688e-07	-0.117261	0.999874	0.603652	0.961182	0.0772069	0.890881	-0.18446	0.930874	6.17441	3.00621	6.02401	1.39441	8.78468	10.757	15.1115	26.7572	39.3365	21.7682
proteinId122635	PCON_03384	SMAC_06092	-2.39378	NA	-1.30617	NA	-1.45047	NA	1.37115	NA	1.138	NA	-5.77456	NA	0.935846	NA	716.009	147.425	69.9492	240.515	2370.45	977.583	2067.98	127.096	79.1608	0.462247
proteinId122869	PCON_01734	SMAC_06161	-0.848379	0.464857	-2.75338	0.0271487	-3.01962	0.00268876	-0.330937	0.999874	-0.597698	0.998971	-4.80747	0.000123089	1.75456	0.577258	13.08	0.880594	4.01116	0.628967	5.57727	8.04368	4.71739	14.3298	5.09424	0.0286101
proteinId122921	PCON_01725	SMAC_05504	1.85416	0.00163519	-0.0795661	0.954981	0.731852	0.208698	0.54704	0.999874	0.531822	0.998971	2.70013	2.0375e-06	-0.448194	0.830072	321.779	162.53	676.657	250.521	272.005	207.867	278.197	98.4465	174.909	643.984
proteinId122968	PCON_01729	SMAC_06297	-1.8775	0.000514571	-0.156118	0.884416	0.473563	0.368104	-0.850442	0.606378	-0.62313	0.981384	1.7438	0.000544522	0.294422	0.882664	33.5471	16.0581	5.00786	115.429	56.5264	116.352	68.5731	40.5345	45.5417	78.1574
proteinId124075	PCON_11750	SMAC_00341	-2.70025	3.65072e-07	-2.24962	9.50499e-05	-2.72423	1.14991e-08	0.573096	0.999874	-0.598326	0.998971	2.82609	4.92199e-08	-0.485054	0.8059	55.3915	6.12726	4.7399	24.0717	306.291	229.949	138.529	7.78301	13.4875	54.6125
proteinId124128	PCON_11756	SMAC_02628	-1.5445	6.58663e-05	0.134955	0.860993	1.31422	0.000200778	2.63187	1.87316e-11	1.44847	0.00165803	0.311486	0.477194	1.1342	0.128457	108.681	63.9863	20.9015	74.5101	233.561	41.7637	105.639	36.7369	21.6377	13.4364
proteinId124370	PCON_01079	SMAC_03370	3.27049	1.52463e-06	-5.50202	2.09454e-06	0.722049	0.319809	0.0132872	0.999874	-0.378542	0.998971	-0.291169	0.724801	-2.7334	0.0170503	8.63594	0.0445355	50.2011	4.84763	3.64413	4.06988	2.88569	0.627722	5.70249	2.78288
proteinId1244	PCON_06455	SMAC_04087	2.16721	0.00524464	-0.191159	0.905656	-3.63938	8.34277e-06	-1.36055	0.574402	-0.198946	0.998971	0.0332895	0.971838	0.598681	0.829185	105.137	49.4433	285.61	0.530385	3.1303	9.58373	7.59008	92.4186	72.3068	34.65
proteinId124542	PCON_03740	SMAC_01456	0.623646	0.123058	-1.13429	0.0119208	0.490196	0.186413	-0.515818	0.858718	-0.439263	0.998971	1.28506	0.000794448	-0.404192	0.770809	14.8431	3.58054	12.9529	57.4069	35.4675	57.3486	38.6908	5.14904	7.6323	10.3318
proteinId124611	PCON_01487	SMAC_02222	0.250677	0.653391	-0.407612	0.597285	-2.35472	6.26811e-08	-0.0685834	0.999874	-0.00752972	0.998971	-0.838644	0.0938895	0.186767	0.930969	14.9992	6.04112	10.1793	8.58135	52.7127	62.3592	56.8088	23.6357	23.8888	6.76693
proteinId124715	PCON_11758	SMAC_06696	0.519345	0.592196	0.551694	0.703815	-0.0428549	0.964048	-0.49766	0.999874	-1.72977	0.319938	-3.24433	0.000555807	-0.0643318	0.99255	15.7163	12.5075	13.1345	24.0103	21.7438	35.2665	9.17503	3.70068	4.62464	0.229323
proteinId125601	PCON_03725	SMAC_05947	1.88887	0.000468958	-4.32175	7.13229e-16	-1.11719	0.0290253	1.25316	0.192868	0.0227898	0.998971	0.197076	0.752892	0.676706	0.696472	1165.23	29.8347	2524.27	505.295	3311.1	1537.03	1437.35	255.817	204.052	117.001
proteinId126087	PCON_01481	SMAC_06636	2.21997	0.000100448	-0.0251329	0.985699	0.883519	0.115821	0.401097	0.999874	0.380586	0.998971	2.28167	5.11271e-05	-0.727481	0.696472	54.4899	28.7116	149.098	51.7251	45.7022	38.7776	46.6238	19.479	41.049	116.918
proteinId12615	PCON_05625	SMAC_00420	1.43228	0.0413287	2.76443	0.000155413	-0.870271	0.198341	0.509022	0.999874	0.244438	0.998971	-0.945288	0.184372	0.087712	0.985374	1632.96	6302.25	2578.12	368.403	1207.56	946.01	1033.85	1590.54	2024.02	556.341
proteinId126582	PCON_07607	SMAC_01936	1.60154	0.02018	-0.468757	0.676705	-2.97723	9.27019e-07	-2.18658	0.011891	-1.83183	0.0599174	0.323097	0.676101	1.02231	0.638121	51.698	19.8228	92.3293	13.2339	29.0501	155.908	38.7628	35.6072	19.0458	12.1692
proteinId126698	PCON_13827	SMAC_00314	0.874522	NA	-0.837925	NA	-4.04748	NA	-0.595071	NA	-0.332042	NA	3.79536	NA	0.492893	NA	467.153	137.853	493.008	14.4812	207.574	357.547	258.782	293.931	238.844	1746.5
proteinId126792	PCON_03743	SMAC_03054	-1.33647	0.00269889	-1.10127	0.0268132	0.998922	0.00464027	0.484989	0.926606	0.41669	0.998971	-2.24414	1.28554e-09	0.276388	0.841038	17.0621	4.21953	3.76722	37.1349	32.3987	26.0065	32.1167	41.2455	42.488	4.49602
proteinId127428	PCON_01699	SMAC_03741	2.15655	7.14406e-08	-0.528786	0.358108	-1.21669	0.00136932	-0.290977	0.999874	0.0120155	0.998971	0.477688	0.28628	-0.650699	0.635341	41.9326	15.5806	107.782	14.1261	33.5457	46.3108	42.885	5.02629	9.59516	6.57495
proteinId128308	PCON_02257	SMAC_06526	0.211336	0.498284	-0.916175	0.00349748	-1.08323	1.85444e-05	0.427329	0.71081	0.441635	0.68307	0.939108	0.000600425	0.510144	0.521273	78.776	22.1794	51.5178	22.2437	78.9129	66.0119	82.4337	68.0364	59.1301	57.6605
proteinId128563	PCON_05004	SMAC_05731	-2.14337	2.31955e-06	4.19448	6.45871e-23	-0.332281	0.472414	-0.168385	0.999874	0.447372	0.998971	-1.3928	0.00275817	0.793852	0.535623	21.8195	222.941	2.76764	22.6588	31.7086	40.2445	50.5927	12.9958	10.367	1.88576
proteinId128711	PCON_08288	SMAC_00007	1.24567	0.101375	1.76034	0.0407387	1.21264	0.0873823	0.692237	0.999874	1.73195	0.151326	-5.73352	2.50553e-11	0.224305	0.952957	74.5371	144.645	105.929	27.2288	23.3416	16.0048	50.8608	29.5719	32.3611	0.194141
proteinId128737	PCON_02243	SMAC_07544	-3.34452	9.10259e-16	-0.380749	0.535315	-2.56946	3.07551e-13	-1.55593	0.000884614	-1.62299	0.000408811	3.32118	2.86998e-18	-0.416792	0.766174	23.4355	9.59662	1.25646	89.4975	226.774	761.717	223.449	37.5498	58.4174	315.762
proteinId128780	PCON_08554	SMAC_07826	1.69274	0.0906182	1.84389	0.12434	-0.977955	0.319502	-0.578454	0.999874	-1.90742	0.346886	0.751999	0.471987	-0.0365108	0.994019	389.243	832.11	790.369	781.226	1304.87	2249.78	507.057	120.073	157.532	160.692
proteinId128818	PCON_06662	SMAC_07828	-0.0779974	0.899511	-1.10178	0.0762498	-0.976874	0.042425	0.128667	0.999874	-0.637838	0.954348	4.91457	1.88973e-24	-0.185481	0.938837	32.9158	8.08841	17.6029	44.465	120.234	123.647	72.4699	23.3776	32.2311	505.009
proteinId130040	PCON_13905	SMAC_06966	-0.648604	0.379203	-0.308963	0.807375	-0.1385	0.858058	-0.51926	0.999874	-0.782491	0.998971	-3.53346	1.92766e-07	0.819721	0.714327	27.1137	11.6525	9.65011	51.6619	49.3975	80.6531	42.3386	48.4471	32.8819	1.19024
proteinId130264	PCON_08451	SMAC_08436	-2.27987	0.0111135	0.0334277	0.988332	-0.143986	0.887628	0.102144	0.999874	-0.0857749	0.998971	-2.12165	0.015542	0.330227	0.933744	24.4545	13.5682	2.63618	6.2225	9.09085	9.51116	8.18727	52.6647	52.1448	4.93919
proteinId130633	PCON_05714	SMAC_08130	0.441048	0.622969	0.0602782	0.974969	0.642522	0.429816	0.096447	0.999874	-0.242004	0.998971	-1.80867	0.0210086	0.635714	0.820034	8.30325	4.66308	6.4125	79.563	67.747	71.2777	54.9612	108.592	83.9062	10.5804
proteinId131171	PCON_05748	SMAC_01490	-5.53049	NA	-3.51079	NA	1.67639	NA	4.06534	NA	2.14515	NA	-1.30526	NA	-0.0968589	NA	2310.98	100.182	24.1045	43.5016	303.939	18.1267	78.6233	40.7398	46.5978	9.56724
proteinId131640	PCON_08654	SMAC_00603	-1.08655	0.224315	-0.928139	0.437247	0.60856	0.486007	0.256996	0.999874	0.0578381	0.998971	1.68503	0.044719	0.584759	0.843651	33.8178	9.28433	8.68093	27.2223	26.2193	24.5502	23.4781	21.4242	18.4313	27.3569
proteinId131712	PCON_11668	SMAC_02876	1.22053	0.00125558	-0.736556	0.120987	-1.66822	4.1588e-06	-0.241793	0.999874	-0.0397348	0.998971	0.161089	0.714923	0.655789	0.562176	83.3158	26.6648	111.476	4.82523	15.4823	20.6769	18.4542	35.7695	29.051	16.2687
proteinId131824	PCON_12585	SMAC_04918	0.433141	0.564584	-0.496483	0.649109	-0.332859	0.639771	0.385879	0.999874	0.654089	0.998971	1.73646	0.00729716	0.725357	0.760832	17.6053	6.5757	13.4972	19.5527	40.1964	34.3949	50.4663	183.283	135.202	216.573
proteinId13220	PCON_13349	SMAC_00131	0.565771	0.294202	0.68995	0.307734	-2.2619	4.18351e-07	0.320934	0.999874	-0.0159845	0.998971	-8.97878	2.37335e-47	0.206728	0.923113	92.4216	80.1769	77.4918	17.2299	131.729	118.544	107.35	184.156	178.061	0.139906
proteinId133470	PCON_10179	SMAC_05971	-1.91605	0.0283204	-0.596199	0.67094	0.303071	0.747984	-0.0301835	0.999874	-0.0676127	0.998971	-0.901262	0.314118	1.4378	0.564047	18.9295	6.57523	2.60158	64.6672	63.1215	72.7064	63.5099	543.334	241.743	55.8755
proteinId133922	PCON_01472	SMAC_05017	-1.76368	0.0237224	1.2771	0.195623	0.0507386	0.95309	-3.12142	0.000322386	-1.46873	0.377843	-0.49851	0.572653	0.671863	0.81097	152.754	204.444	24.2212	252.408	32.6563	350.252	111.58	13.2038	10.7942	4.08466
proteinId13432	PCON_03182	SMAC_06065	-0.223454	0.719163	1.88573	0.00141528	0.691241	0.195353	-0.716823	0.892892	-0.477934	0.998971	-2.06739	8.71587e-05	0.72065	0.667657	69.3716	141.594	33.7326	58.5053	26.6643	50.008	32.7247	277.776	178.724	23.2842
proteinId134510	PCON_10912	SMAC_05740	-2.07165	1.35604e-06	-1.05958	0.0304006	-0.0806645	0.860543	0.0501994	0.999874	-0.261998	0.998971	1.69989	1.1719e-05	1.21693	0.0821067	22.3597	5.72287	2.95325	63.1891	85.9615	93.5491	71.4276	97.549	51.7095	85.1887
proteinId134753	PCON_09526	SMAC_02537	-0.0285726	0.973343	-0.505299	0.610513	-0.36011	0.590187	-0.548435	0.999874	-0.352392	0.998971	0.54646	0.417324	-0.182875	0.956926	125.791	46.9182	69.4996	84.5824	93.1668	155.249	110.748	31.4001	44.5427	37.337
proteinId134812	PCON_04733	SMAC_03779	1.70486	0.000707589	0.910585	0.158986	-2.05461	8.53181e-06	-0.035376	0.999874	-0.41804	0.998971	0.57883	0.298678	0.200432	0.930969	4.67029	4.75042	8.84074	3.26486	16.8559	19.4968	13.3295	2.56551	2.68436	2.29169
proteinId135060	PCON_09458	SMAC_00929	1.1474	NA	-0.0587968	NA	1.51197	NA	-0.746574	NA	-1.71143	NA	3.63208	NA	-0.907523	NA	11.768	6.02674	15.037	543.007	137.924	262.935	72.3886	10.5087	25.2657	154.749
proteinId135684	PCON_04756	SMAC_01710	-2.13314	5.66418e-07	0.58509	0.3062	2.64868	5.82704e-13	0.119243	0.999874	0.561148	0.887849	-2.28957	1.82468e-08	-0.223981	0.897232	37.6751	30.7373	4.80415	499.967	107.352	111.302	151.457	76.2658	108.863	10.9245
proteinId13658	PCON_13639	SMAC_04199	-0.0563465	0.925042	-1.08865	0.06297	-1.52867	0.000571185	0.212611	0.999874	-0.106076	0.998971	2.48152	1.16129e-07	-0.822193	0.572056	116.314	28.9078	63.1479	46.0008	193.145	187.393	159.501	28.5447	62.7514	196.236
proteinId1369	PCON_04553	SMAC_12117	-0.880466	0.0425495	0.125873	0.883389	0.544964	0.180798	-0.398025	0.999874	-0.322482	0.998971	1.45177	0.000400827	-0.545484	0.682444	27.2429	15.9049	8.34497	58.9254	38.1293	56.8301	41.5781	9.03433	15.4038	22.4959
proteinId137149	PCON_13789	SMAC_08027	-0.857695	0.0741965	-0.688182	0.262216	-1.73011	3.06782e-05	0.0588105	0.999874	-0.186986	0.998971	0.439255	0.362559	-2.08556	0.000777809	16.1542	5.33582	4.94779	6.08555	25.7821	27.8861	22.485	6.10872	34.1098	23.2547
proteinId137348	PCON_11353	SMAC_04049	-4.79116	1.13104e-14	-0.262432	0.796529	-0.936507	0.0754939	0.113239	0.999874	-0.165851	0.998971	-0.0684988	0.917064	0.136794	0.964332	31.2342	13.8858	0.539104	33.7445	88.6939	92.2875	75.3481	28.5074	32.8998	15.1584
proteinId137608	PCON_13548	SMAC_05079	1.84245	0.0409373	2.33719	0.0217897	0.896078	0.317444	-0.831119	0.999874	-0.693497	0.998971	-2.40186	0.00596918	-0.337784	0.930969	50.9241	150.07	111.222	121.875	42.5861	88.5611	48.7392	71.4292	113.68	11.6486
proteinId137701	PCON_04894	SMAC_02648	-3.18551	6.92995e-11	-0.698172	0.30377	0.108345	0.849988	-0.135799	0.999874	-0.230324	0.998971	1.13902	0.0232434	0.359371	0.841927	200.899	65.4894	12.0052	172.147	179.359	222.351	173.566	179.913	171.831	211.826
proteinId139524	PCON_02091	SMAC_03797	-0.730904	0.331392	0.114154	0.939266	1.81412	0.00416997	-0.606804	0.999874	-0.676113	0.998971	-5.17387	7.65997e-13	1.31267	0.502174	14.8538	8.64858	4.98192	57.5027	12.8039	22.2718	12.5964	61.962	29.0049	0.317062
proteinId14015	PCON_10191	SMAC_07909	0.867143	0.0750162	1.35968	0.0108695	1.60749	0.000191063	-0.275916	0.999874	0.504246	0.998971	-0.556329	0.273277	-0.854612	0.529508	77.7239	108.367	80.815	46.5873	15.3917	21.1165	27.6797	12.9333	31.5247	9.90874
proteinId140394	PCON_11349	SMAC_06430	-0.418299	0.668911	-1.14629	0.327403	1.38813	0.0930876	-0.0793928	0.999874	0.151105	0.998971	-4.52774	0.000280719	1.61183	0.521916	44.0106	10.3511	18.476	23.4435	10.2946	12.2998	12.6363	9.59337	3.69856	0
proteinId140455	PCON_13667	SMAC_06126	-1.72852	0.00857362	-0.171131	0.895657	-0.643392	0.325581	-0.516852	0.999874	-0.656929	0.998971	-4.96808	4.23808e-14	0.171275	0.959679	9.80318	4.68432	1.62431	5.34828	7.24678	11.8208	6.78132	15.5896	16.907	0.225444
proteinId140532	PCON_12938	SMAC_02489	0.55717	0.187511	0.456248	0.420099	0.464309	0.248446	-0.303899	0.999874	-0.178353	0.998971	2.0227	1.19687e-07	-0.049331	0.985991	37.4384	27.585	31.2727	22.9751	16.5241	23.0709	18.7023	14.2947	17.8284	40.4098
proteinId140590	PCON_02937	SMAC_04269	1.84792	0.00550974	1.28762	0.117793	0.126326	0.868469	0.313486	0.999874	0.0496726	0.998971	2.20902	0.000812327	-0.471382	0.84651	15.4583	20.7133	32.436	13.6034	19.1332	17.2763	16.4525	3.39128	4.54616	12.9683
proteinId140670	PCON_07600	SMAC_01922	1.47971	0.0912993	0.286894	0.863704	0.134004	0.889659	0.0817268	0.999874	0.313827	0.998971	0.413629	0.663221	-0.390276	0.913354	98.7599	65.6201	165.533	80.0316	96.043	101.992	117.286	40.1409	66.706	53.2924
proteinId140675	PCON_07546	SMAC_07399	1.76435	6.83999e-05	-0.132079	0.886366	1.33415	0.00223668	-0.252751	0.999874	-0.142769	0.998971	-2.42271	1.16121e-07	-0.601287	0.675837	43.9989	21.4878	86.0339	9.58086	3.83132	5.18379	4.28245	16.471	30.548	3.06618
proteinId140981	PCON_10962	SMAC_02668	1.481	0.011757	0.951055	0.209559	0.647553	0.267212	0.678869	0.990463	0.643056	0.998971	-4.28111	8.27519e-11	0.182354	0.952957	24.9876	26.2163	40.5209	16.1684	20.729	14.433	20.8875	11.2824	11.0291	0.265905
proteinId141265	PCON_05265	SMAC_01340	2.03369	0.000825197	0.275448	0.811254	2.86809	1.28735e-07	0.167393	0.999874	-0.217122	0.998971	1.15394	0.0637213	0.656437	0.762972	65.3649	42.8194	158.291	315.497	58.6861	58.8198	46.2886	45.7186	39.3166	45.9011
proteinId141331	PCON_10160	SMAC_05844	-2.24781	NA	1.74338	NA	-1.37442	NA	-2.02752	NA	-0.0957585	NA	-0.84916	NA	1.12649	NA	713.827	1358.74	81.5959	17.3464	13.3238	65.1308	56.1654	86.7965	49.5282	14.7491
proteinId14168	PCON_03712	SMAC_05338	3.78373	7.0512e-06	-8.27307	1.46995e-15	0.68498	0.445989	0.392365	0.999874	0.320125	0.998971	3.44473	7.6125e-05	-0.576672	0.860879	93.0275	0.0651308	811.492	138.705	142.846	121.287	139.831	1.25276	2.51302	13.0371
proteinId141877	PCON_09612	SMAC_00500	3.06215	5.67928e-07	-0.00285013	0.998	-0.452739	0.505246	-0.313231	0.999874	0.0170311	0.998971	0.809288	0.21935	-0.109007	0.976111	48.0746	25.8587	241.63	6.29648	8.58712	12.0996	11.2553	42.5156	57.3737	48.3762
proteinId14201	PCON_03055	SMAC_04337	0.0137606	0.983499	-0.999512	0.097739	-0.555743	0.259848	-0.456021	0.999874	-0.413094	0.998971	0.745852	0.143865	0.638474	0.680935	114.46	30.1951	65.2966	33.2837	44.1733	68.6697	47.1039	47.2514	39.2284	34.3678
proteinId14231	PCON_02817	SMAC_02462	-1.12206	0.208828	-1.03468	0.373996	1.74969	0.0284844	0.442446	0.999874	-0.0586808	0.998971	-8.23271	1.37501e-11	-0.0198035	0.995399	28.8242	7.25067	7.18794	12.8816	6.14659	5.02211	4.44728	28.3086	35.4797	0
proteinId142359	PCON_06457	SMAC_05129	2.75355	1.39953e-06	1.83672	0.00503147	1.46961	0.00676399	-0.579953	0.999874	-0.374536	0.998971	-0.305432	0.643508	0.186151	0.950145	86.4581	171.04	346.65	103.522	30.0152	51.1424	35.9601	64.1707	67.6108	31.085
proteinId142914	PCON_03745	SMAC_02617	1.57842	0.0358058	-0.316691	0.820239	-1.65043	0.0169548	-0.241147	0.999874	-0.422585	0.998971	0.622043	0.432536	0.119351	0.977818	18.1375	7.71772	31.9064	8.66132	29.0381	38.9389	26.4124	40.9504	47.8989	34.0825
proteinId143412	PCON_09234	SMAC_08084	-2.13466	0.000151634	-1.48891	0.023826	-1.30873	0.012918	0.571465	0.999874	0.221985	0.998971	3.94757	2.10478e-13	-1.05249	0.512627	153.554	28.5461	19.141	46.2816	215.455	162.056	174.068	32.3286	83.3985	770.508
proteinId144072	PCON_13900	SMAC_06088	1.10555	0.0477718	-0.479985	0.567392	1.38049	0.00587022	-0.222143	0.999874	-0.230882	0.998971	-2.73177	8.76607e-07	0.646425	0.72937	151.898	58.1852	188.372	222.546	89.4418	118.069	92.0391	43.4703	32.8512	2.60479
proteinId144278	PCON_09818	SMAC_03806	-0.427668	0.461877	-1.87582	0.00119225	-4.15007	5.19235e-18	0.204426	0.999874	0.0279479	0.998971	2.43867	1.35601e-06	-0.466596	0.8059	47.5798	6.82062	20.0211	2.11416	54.338	52.9961	49.6929	32.2031	57.7685	150.826
proteinId144914	PCON_12978	SMAC_06820	-2.11065	0.00522136	0.43732	0.726809	-2.33011	0.00196245	-0.58687	0.999874	-0.592032	0.998971	-5.72423	3.03697e-15	0.162719	0.969182	21.0842	15.4991	2.60279	0.949611	3.75709	6.48914	3.87283	88.0264	97.1907	0.84587
proteinId145506	PCON_03711	SMAC_02058	1.86677	0.00822053	0.872545	0.37159	1.07699	0.112399	0.172981	0.999874	-0.12532	0.998971	1.37068	0.0534748	-0.607876	0.810127	133.294	133.764	288.508	126.848	82.6449	82.201	69.136	31.155	58.1507	90.8186
proteinId145776	PCON_05044	SMAC_02598	-1.76139	0.0254595	-1.57856	0.0940235	-2.39492	0.000864336	-0.39839	0.999874	-0.583472	0.998971	-5.01975	6.90432e-07	-1.00958	0.688801	76.5764	13.3001	12.396	6.29957	32.8407	49.3167	29.8527	5.04431	14.2454	0.103311
proteinId145856	PCON_12857	SMAC_00477	1.43215	0.00267455	-0.643263	0.324603	0.239299	0.643947	-0.407586	0.999874	0.082318	0.998971	0.219904	0.689022	-1.16195	0.30269	45.5312	15.4913	70.4611	32.2842	25.419	38.1999	37.1235	6.90362	18.5454	12.3185
proteinId146838	PCON_04239	SMAC_00091	-0.11949	0.882518	0.133269	0.926682	0.207607	0.784184	0.149513	0.999874	0.124507	0.998971	0.473005	0.521035	0.79026	0.729988	207.139	125.357	110.452	42.6945	50.9989	51.73	51.8622	55.0096	35.8212	25.7674
proteinId146861	PCON_06690	SMAC_02436	0.00285988	0.996969	-0.371818	0.735828	1.38522	0.0149839	0.891285	0.77687	0.583248	0.998971	2.4397	3.69255e-05	-0.111857	0.975216	16.2889	6.72344	9.29044	69.4916	61.065	36.5402	50.7565	22.9132	33.5342	100.296
proteinId147596	PCON_14317	SMAC_01524	-1.32223	0.0750522	0.621175	0.571965	-0.0865076	0.916429	0.823591	0.995854	0.550096	0.998971	-0.826795	0.273777	0.850778	0.723253	82.5713	69.51	18.2975	78.3337	186.962	116.924	159.191	69.2454	49.1255	15.1076
proteinId147883	PCON_13337	SMAC_02136	1.22933	0.0366965	-0.429075	0.646725	1.66777	0.00146837	0.183083	0.999874	0.234802	0.998971	-2.54049	1.54789e-05	-0.464784	0.822807	32.6286	13.0481	44.7667	104.536	46.3262	45.8921	49.826	13.604	24.6701	1.90705
proteinId147889	PCON_08805	SMAC_06055	0.0348147	0.955445	-0.886421	0.141464	3.48166	4.39877e-17	-2.42931	2.94746e-06	-2.74908	5.3841e-08	-0.868808	0.0775442	-0.374485	0.828339	84.8863	24.3554	49.228	472.967	9.27819	58.0431	7.7133	21.9432	36.447	10.503
proteinId147918	PCON_12030	SMAC_01246	0.542896	0.361943	1.09316	0.105312	0.108461	0.862806	0.274653	0.999874	0.127206	0.998971	-0.018113	0.977491	1.03856	0.502174	89.2626	104.143	74.6784	100.703	141.515	131.571	132.015	155.617	95.429	51.3499
proteinId148106	PCON_04744	SMAC_01713	-1.33085	0.0314934	-0.725818	0.391086	-0.228206	0.736409	0.0568953	0.999874	-0.109011	0.998971	2.04159	0.000783772	0.0859995	0.982337	25.6011	8.1701	5.67189	4.75172	7.20813	7.80388	6.64312	3.86849	4.56122	11.3621
proteinId148157	PCON_01867	SMAC_08632	1.22252	0.00943427	-1.34778	0.0119305	-1.1153	0.00974344	-0.462418	0.999874	-0.374576	0.998971	-0.305035	0.554661	0.492496	0.762972	22.7104	4.69146	30.2805	17.548	34.3098	53.5234	37.7346	19.078	16.9237	6.5756
proteinId148482	PCON_07259	SMAC_05159	-1.90235	0.0310152	-0.772637	0.557779	2.35033	0.00302449	-0.662913	0.999874	-0.453672	0.998971	-1.86093	0.0458178	0.533472	0.868588	123.821	38.4464	17.8347	352.132	50.842	92.862	61.3272	7.17319	6.22667	0.643618
proteinId148588	PCON_13307	SMAC_02679	-0.353157	0.47498	-0.72254	0.216359	1.13454	0.00552582	-0.431273	0.999874	0.451907	0.998971	-2.8155	5.76384e-07	0.159468	0.94361	57.2277	18.5306	25.4394	79.7128	33.1988	50.6965	63.4685	7.30506	8.85867	0.575328
proteinId148593	PCON_08250	SMAC_04865	-4.70273	1.01486e-05	1.19982	0.377057	2.70142	0.00254558	-0.40299	0.999874	-0.126218	0.998971	-1.64888	0.0957558	1.66859	0.546749	43.7514	57.8447	0.569153	279.862	35.3181	53.8939	44.9837	565.241	206.377	27.5528
proteinId14869	PCON_12400	SMAC_04069	1.16577	0.303239	0.421566	0.834524	-0.102697	0.932265	-0.567903	0.999874	-0.598137	0.998971	-0.990503	0.374726	0.895543	0.810127	12.1126	8.94593	16.6016	5.9551	5.02349	8.71497	5.08685	100.575	64.7463	13.5523
proteinId148742	PCON_07261	SMAC_07530	-0.431832	0.691173	0.440595	0.80152	-0.333552	0.752957	-2.16214	0.199838	-2.20313	0.162953	0.497036	0.638146	-3.36128	0.019653	11.109	8.25431	4.57979	27.5379	9.02135	50.1793	9.06367	1.69046	22.6914	15.7504
proteinId148951	PCON_12052	SMAC_08042	0.479745	0.32923	0.311093	0.679372	0.891324	0.0376287	-0.21326	0.999874	0.248223	0.998971	1.24552	0.00535315	0.736877	0.58315	49.8111	33.3559	39.6547	45.155	26.0046	34.0778	37.299	71.6618	52.8902	62.1284
proteinId149117	PCON_06796	SMAC_04412	-1.22601	0.0614969	0.542231	0.57609	0.632108	0.327408	0.582498	0.999874	0.579485	0.998971	0.320379	0.674455	0.389952	0.875612	70.5606	55.8237	16.6691	22.5825	27.1839	20.2648	28.0515	9.5658	11.0401	6.99091
proteinId15021	PCON_09581	SMAC_04695	1.08363	0.0525131	-1.30458	0.0486815	2.62806	3.2177e-08	3.58169	3.03441e-11	3.37699	7.00843e-10	0.0770818	0.903777	0.0747353	0.982337	22.4732	4.77515	27.6065	116.22	287.157	25.8085	257.183	22.6347	27.3755	13.4521
proteinId150223	PCON_01045	SMAC_07879	1.15632	0.104113	1.17838	0.178562	0.934556	0.161769	0.400242	0.999874	0.203239	0.998971	-0.38511	0.61012	0.903964	0.6704	15.1217	18.6379	19.4113	19.322	16.4968	13.9661	14.8205	63.7059	40.7698	14.6802
proteinId15035	PCON_08576	SMAC_07673	3.12736	4.86887e-06	1.12235	0.222845	1.68086	0.00979771	-0.0585528	0.999874	0.427043	0.998971	-4.16163	1.13309e-09	0.911752	0.680253	176.422	212.365	941.746	275.621	99.3862	116.99	146.12	314.591	224.398	6.01994
proteinId151745	PCON_05720	SMAC_00825	1.07234	0.00259064	-0.156165	0.815538	-0.382041	0.286519	0.022573	0.999874	-0.199169	0.998971	2.88831	9.2003e-18	0.313435	0.809227	95.6313	46.1261	115.672	29.3021	48.3436	53.6733	42.7597	51.2643	52.3246	201.979
proteinId15185	PCON_12126	SMAC_12700	-2.09658	0.00111438	-0.437493	0.681709	1.12964	0.0657959	0.0517737	0.999874	-0.0839191	0.998971	0.944593	0.155344	-0.449114	0.843798	349.516	137.851	44.7106	116.179	66.7775	72.5966	62.7361	45.5195	88.5632	89.7593
proteinId152079	PCON_04752	SMAC_01722	3.50683	0.000316549	-5.45158	8.17099e-07	0.52141	0.625678	0.408266	0.999874	0.497372	0.998971	3.25844	0.000716975	-0.0445385	0.994019	13.7448	0.089326	103.999	105.65	123.458	103.028	136.539	12.3652	16.3409	79.4275
proteinId15225	PCON_12822	SMAC_03103	-1.11851	0.0915087	-1.69673	0.0218921	0.461794	0.483142	-1.10094	0.531102	-0.157846	0.998971	3.47549	7.76124e-09	0.022896	0.994019	10.3606	1.65298	2.63513	15.0205	6.15161	15.171	12.4006	20.4978	24.6074	137.885
proteinId152253	PCON_13184	SMAC_09547	-2.25876	NA	-1.48639	NA	-0.080044	NA	-1.10379	NA	-1.14561	NA	2.31148	NA	0.92116	NA	53.9398	9.58192	5.79472	5.4296	3.13589	8.14711	3.13795	42.1436	29.976	78.9114
proteinId152668	PCON_06438	SMAC_02916	-4.43029	1.25643e-10	-0.562562	0.219984	0.0345115	0.920043	-0.300129	0.999874	-0.253694	0.998971	1.27336	1.33407e-05	0.264929	0.809329	9.83199	3.55512	0.194237	26.1291	25.5819	35.5636	27.2832	24.4796	25.7322	31.7098
proteinId152777	PCON_02663	SMAC_00480	0.251649	0.714505	0.456336	0.636365	-0.994031	0.08588	0.0801864	0.999874	0.458941	0.998971	2.20289	0.000164769	-0.703098	0.732514	280.828	209.06	190.333	57.854	152.938	163.174	207.392	30.3688	72.1521	173.39
proteinId153577	PCON_08043	SMAC_07429	2.14768	0.0108356	-1.31397	0.260074	0.630791	0.47112	0.125688	0.999874	0.0819758	0.998971	4.02508	4.02922e-07	0.0353661	0.994019	6.21515	1.25282	16.7705	9.0342	7.85212	8.06509	7.87237	5.04004	6.70024	69.0514
proteinId154193	PCON_09280	SMAC_02465	-0.868356	0.245288	-0.609468	0.568589	2.97182	1.4074e-06	0.103292	0.999874	0.0475654	0.998971	-0.303041	0.701195	-0.0817974	0.986449	32.318	11.139	9.712	96.3389	15.6066	16.3218	15.5989	14.0789	19.7739	8.71176
proteinId154711	PCON_06537	SMAC_02319	1.33233	0.00496366	-1.33466	0.0165446	-3.22892	3.83572e-13	-0.355437	0.999874	-0.739472	0.700059	2.98509	2.51528e-11	0.404205	0.810127	27.3812	5.72439	39.4737	3.52042	30.1926	43.7435	23.8792	28.1615	27.3573	112.171
proteinId155295	PCON_13831	SMAC_00312	0.998808	0.306648	-0.571428	0.712742	1.21856	0.170792	0.0130774	0.999874	0.0185572	0.998971	-1.92443	0.055419	1.14015	0.699879	32.583	11.5055	38.5454	32.1731	16.8436	18.829	17.521	7.91327	4.03963	0.419682
proteinId155407	PCON_12650	SMAC_00352	0.346122	0.67384	0.964294	0.324603	4.2935	1.16221e-11	0.900984	0.942611	0.967349	0.881087	0.862071	0.253563	-0.271935	0.932822	122.98	132.102	89.9781	2274.3	259.37	153.057	282.277	75.9708	121.995	123.691
proteinId155669	PCON_06608	SMAC_01264	1.42242	0.000640619	-1.98807	3.84691e-05	-1.52869	0.000136692	-0.0364315	0.999874	0.0921414	0.998971	-0.0820971	0.865655	0.60808	0.638121	28.0479	3.71978	43.4086	9.05712	30.1174	34.8202	34.1444	45.0557	35.4725	17.8892
proteinId156296	PCON_07255	SMAC_01947	1.4703	0.000440698	1.25044	0.00866005	0.706521	0.047324	-0.220114	0.999874	0.172611	0.998971	1.32148	0.00030948	-0.109838	0.957511	5.57651	7.20276	8.96329	27.44	17.8452	23.4818	24.3507	29.3952	40.4198	50.7008
proteinId15704	PCON_06126	SMAC_01848	-1.05297	0.153434	-0.391268	0.753557	1.51215	0.0203059	-0.0168769	0.999874	-0.0359873	0.998971	-3.46172	4.7289e-07	0.27036	0.930278	33.0098	13.3562	8.768	91.4736	38.624	44.0552	39.4324	30.519	30.9693	1.18559
proteinId157158	PCON_05632	SMAC_01889	-1.13707	0.0727047	-1.21213	0.107867	1.08968	0.0562384	0.425522	0.999874	-0.00960338	0.998971	0.194649	0.776604	0.369074	0.863065	22.5097	5.07102	5.69324	59.1848	46.17	38.4777	35.136	57.0295	55.8382	29.7446
proteinId158367	PCON_11222	SMAC_00650	0.467915	0.677049	-5.19279	2.20546e-05	-0.284521	0.798002	-4.86545	4.96122e-05	-4.27096	0.000285777	-1.59128	0.14849	0.363086	0.939673	12.7265	0.115359	10.0383	4.43291	0.170805	7.95265	0.290748	2.96117	2.82504	0.366449
proteinId158573	PCON_01543	SMAC_07875	2.59695	3.2048e-05	0.319874	0.783879	2.83541	5.66614e-07	-0.790218	0.947653	-1.01293	0.678233	-4.03168	7.74058e-10	0.524096	0.816243	43.6679	29.4911	158.274	447.795	43.2181	85.578	38.2335	31.0627	26.4125	0.831156
proteinId15891	PCON_12928	SMAC_07535	1.54161	0.087499	-0.13807	0.942737	0.654052	0.472479	-0.106275	0.999874	-0.566137	0.998971	1.72845	0.0488334	0.403278	0.913354	36.5545	17.7164	64.1028	54.2575	38.5814	47.0419	28.5361	78.8182	73.4223	114.869
proteinId158938	PCON_01342	SMAC_05929	-2.00298	0.000690911	1.4476	0.0177684	2.52119	5.81944e-08	-0.32455	0.999874	2.24682	0.00011335	-2.96218	5.40438e-09	-0.784162	0.638121	6.6098	10.016	0.912214	32.4631	5.42725	7.70926	34.4524	24.5712	53.9703	3.32422
proteinId159004	PCON_10507	SMAC_01743	-4.92987	1.27645e-13	-0.595163	0.513611	-0.209583	0.758582	0.192759	0.999874	0.0627539	0.998971	0.824896	0.193308	-0.766054	0.696472	28.5192	9.99544	0.450625	29.2305	48.848	48.0026	45.9731	14.7334	31.5499	27.0681
proteinId159110	PCON_06585	SMAC_00749	-4.32397	0.000261989	-0.630505	0.712544	-0.266385	0.80893	0.738045	0.999874	0.317165	0.998971	-0.747322	0.480141	1.57772	0.584868	3.79074	1.25706	0.0327205	14.2332	38.154	24.9392	28.9206	114.245	44.3983	11.4928
proteinId159162	PCON_13703	SMAC_06113	2.33824	0.00377765	-0.93373	0.414583	2.09272	0.00481568	0.680776	0.999874	0.126349	0.998971	5.52694	4.90684e-13	1.15667	0.64648	37.3177	10.1045	115.9	158.048	71.6013	49.2965	49.5402	121.644	66.6859	1619.39
proteinId159175	PCON_11803	SMAC_01467	0.472884	0.494157	-1.51006	0.0407566	2.50209	6.77821e-06	-0.0873608	0.999874	-0.952735	0.731326	1.18993	0.0586462	0.457532	0.841038	38.1255	6.92345	30.1575	1562.55	317.849	381.621	178.084	51.0162	45.7852	49.7397
proteinId159226	PCON_06556	SMAC_07534	-3.41781	1.64187e-10	0.00386414	0.997209	0.921172	0.0449574	0.296059	0.999874	-0.187812	0.998971	2.12297	7.38796e-06	-0.360784	0.841038	11.1422	5.98421	0.544265	44.5561	35.8559	32.819	26.3681	5.02145	8.46869	20.0493
proteinId159363	PCON_06584	SMAC_01466	-0.0549445	0.961157	0.223215	0.898151	1.22783	0.137393	1.42924	0.586027	1.38643	0.635411	5.14631	2.17262e-10	-0.131473	0.97968	12.84	8.30636	7.19686	188.546	275.646	109.777	276.974	15.536	19.97	403.411
proteinId159710	PCON_06222	SMAC_01428	-0.74102	0.154527	-1.00766	0.0948891	-2.97681	7.57892e-12	-0.187698	0.999874	0.155787	0.998971	0.919355	0.0663955	0.0809609	0.977818	102.571	26.8246	34.1923	15.7897	139.02	178.828	183.275	46.1445	52.5486	50.6574
proteinId159757	PCON_06518	SMAC_02989	0.970353	0.123266	2.26381	0.00043818	0.904202	0.116565	-0.37549	0.999874	-0.352628	0.998971	0.0322891	0.964272	-0.316048	0.897112	24.7826	66.3268	27.9506	24.1255	11.9818	17.6574	12.6537	30.8431	49.6309	27.5764
proteinId16009	PCON_13861	SMAC_06801	-0.407367	0.618451	-0.113331	0.942868	-1.27164	0.0657959	-0.157078	0.999874	0.155039	0.998971	-0.616207	0.428956	0.0158529	0.995399	603.826	300.574	256.456	51.4223	139.613	176.445	180.867	266.123	350.263	123.851
proteinId160503	PCON_04961	SMAC_03650	-4.60086	3.94768e-16	0.594042	0.487487	1.24115	0.0234976	1.27266	0.256326	2.47704	0.000161791	-3.47697	6.03058e-10	0.247373	0.923113	469.714	381.564	10.0518	172.678	222.091	101.536	538.313	284.172	290.005	13.2465
proteinId160884	PCON_12972	SMAC_01248	-3.01517	4.32759e-09	-0.589841	0.414583	0.552008	0.279163	-1.00094	0.369187	-1.01821	0.33321	3.25637	1.2247e-11	0.398574	0.827323	32.936	11.6366	2.22307	22.0754	9.1543	20.9194	9.32996	83.3816	76.3514	367.452
proteinId160918	PCON_07028	SMAC_09077	-1.88259	0.0316764	-1.90319	0.0621626	0.541431	0.529699	0.626115	0.999874	0.849314	0.998971	-0.276599	0.768213	-0.317596	0.93008	12.5935	1.65514	1.76838	79.1498	106.735	76.4588	129.929	22.0222	36.5057	17.0587
proteinId161130	PCON_07027	SMAC_01230	-0.500514	0.439898	0.127383	0.91906	0.871786	0.124177	-0.998862	0.571282	-0.709364	0.982167	1.14942	0.0527474	-0.244531	0.923113	44.4096	26.0874	17.6733	56.7329	18.876	43.3049	23.9961	29.2087	41.6944	52.5169
proteinId161431	PCON_12542	SMAC_05387	-0.605786	0.284925	-0.232409	0.813595	-1.30696	0.00642205	0.186982	0.999874	-0.0226985	0.998971	3.10821	3.44219e-10	-0.0241992	0.994019	57.0847	25.792	20.7379	44.3921	157.999	156.157	140.825	84.4628	105.071	520.029
proteinId16173	PCON_03171	SMAC_08610	-1.34865	0.190427	-1.05224	0.449816	-3.83308	1.22452e-05	0.150655	0.999874	-0.420132	0.998971	-0.0496174	0.966831	0.644689	0.848841	13.4271	3.27199	2.78237	2.54382	58.026	58.4881	39.3519	86.3986	66.2099	28.7521
proteinId161969	PCON_12998	SMAC_01232	-1.17115	0.0615291	-0.390088	0.69241	-0.881169	0.108093	-1.32198	0.180229	-1.17743	0.292236	0.46925	0.441168	0.220235	0.93008	3.16354	1.2917	0.78191	5.90755	5.33677	15.3567	6.10674	17.1101	19.0471	12.3978
proteinId162212	PCON_12992	SMAC_01233	-0.761294	0.136272	0.918768	0.122453	1.16267	0.00756476	0.180481	0.999874	-0.367371	0.998971	-3.44695	3.19606e-13	0.420048	0.8059	25.5491	26.1599	8.40504	195.627	122.657	121.742	86.3463	51.9689	46.8474	2.25538
proteinId162556	PCON_05202	SMAC_09057	-0.4406	0.596923	-0.265896	0.854361	-1.22881	0.0822836	-0.00128195	0.999874	-0.339902	0.998971	2.75877	0.000120771	-0.777688	0.762972	84.1512	37.161	34.6814	24.4733	73.4531	82.9472	59.6306	7.89303	16.726	72.5906
proteinId162845	PCON_07051	SMAC_09323	-0.423215	0.596923	-0.164678	0.914584	0.541141	0.464551	1.01148	0.797017	0.93641	0.898761	1.76899	0.011821	-0.182692	0.962594	458.152	213.127	188.316	222.727	383.957	209.315	376.118	293.171	370.997	724.694
proteinId164955	PCON_01716	SMAC_08707	1.43273	0.0228111	-2.47309	0.000599347	0.310624	0.638595	-0.00591506	0.999874	0.405291	0.998971	-3.18112	7.07495e-08	0.288815	0.913354	6.52736	0.587289	10.3842	16.9767	16.9026	19.1274	23.457	73.0874	69.044	3.54922
proteinId165080	PCON_09658	SMAC_00657	-2.33755	1.1802e-09	-0.193061	0.777267	-1.06545	0.00158744	-0.323709	0.999874	-0.608775	0.619374	-5.25055	1.37186e-34	0.961942	0.206268	24.91	11.6519	2.74959	23.0828	48.3403	68.367	40.9433	32.0341	20.3357	0.244491
proteinId165553	PCON_11166	SMAC_03843	-2.22244	6.40152e-06	0.29686	0.72593	-5.01022	8.6972e-31	-0.387627	0.999874	0.109155	0.998971	4.21941	3.88583e-20	0.428152	0.80769	36.6645	24.4735	4.34303	3.68207	113.69	168.542	166.616	61.8222	57.1755	538.765
proteinId16663	PCON_04895	SMAC_05078	0.331853	0.616575	-0.633396	0.451103	1.83195	0.000554004	-0.242788	0.999874	-0.175438	0.998971	0.800215	0.187953	-0.556329	0.788832	49.9337	17.1803	35.9498	57.743	16.5776	22.1954	18.0203	13.7354	25.0263	20.6561
proteinId166772	PCON_07689	SMAC_00798	1.86799	0.0261556	1.78445	0.072466	-2.07109	0.00682183	-0.712747	0.999874	-0.1439	0.998971	1.4925	0.0753031	-0.29295	0.940038	92.0015	179.018	201.37	37.2741	121.787	230.719	190.719	36.0956	53.6995	95.9294
proteinId166808	PCON_13195	SMAC_04781	-2.9651	2.40506e-10	0.0704458	0.94638	-0.764725	0.0863536	0.340266	0.999874	0.440696	0.998971	-3.42952	4.09662e-09	-0.0738538	0.980807	36.8874	20.7932	2.58385	66.5353	181.03	160.722	201.035	3.49961	4.6738	0.216288
proteinId166891	PCON_07692	SMAC_00793	-4.31754	4.66047e-15	0.503527	0.550183	1.10315	0.03432	-0.0885728	0.999874	-0.0241762	0.998971	1.87128	0.000529555	1.02384	0.512733	117.73	91.1977	3.13759	62.7173	33.7843	40.5407	36.6794	69.0381	40.1254	75.697
proteinId166944	PCON_07702	SMAC_02513	-2.51984	0.000107162	0.480105	0.643904	-1.02211	0.0967211	0.24044	0.999874	-0.111817	0.998971	-2.12613	0.000716284	-0.00172284	0.998074	8.38296	6.33963	0.78737	20.6229	63.9498	60.7557	51.4122	27.6092	34.1787	3.52608
proteinId167557	PCON_05079	SMAC_00987	-2.18223	0.0213376	-0.314696	0.86264	0.452529	0.651867	-0.412578	0.999874	-0.737911	0.998971	-1.69995	0.068206	0.079956	0.99108	11.7465	5.02505	1.32158	51.9733	34.5591	52.7298	28.1545	79.9406	93.5712	12.1133
proteinId167576	PCON_05073	SMAC_01830	-0.71022	0.124343	-0.0652101	0.946613	-0.576343	0.185617	-0.465996	0.999874	0.0660563	0.998971	-4.02566	1.73908e-16	0.856074	0.494199	59.9629	30.8818	20.8537	18.6117	25.0823	39.2675	37.7657	45.4518	32.2401	0.960711
proteinId167844	PCON_13954	SMAC_01765	0.604016	0.550416	-0.772252	0.581106	-0.180697	0.86228	0.0360591	0.999874	-0.284879	0.998971	-0.459995	0.650042	-0.150527	0.977549	336.532	101.918	295.049	134.705	195.14	214.244	159.596	76.1887	109.763	45.5044
proteinId168203	PCON_05067	SMAC_02367	-2.92296	4.2426e-05	2.49423	0.00126461	-2.65357	5.97208e-05	1.475	0.307329	0.562789	0.998971	-7.32396	1.3618e-23	1.38158	0.494199	25.5554	80.9468	1.77559	2.13998	51.3683	20.1345	27.7404	246.977	115.101	0.275426
proteinId169039	PCON_04070	SMAC_01224	-2.64884	1.49811e-09	-0.281915	0.687804	0.75065	0.0541044	-0.287189	0.999874	-0.467452	0.998971	0.524779	0.226005	-0.573067	0.667404	19.593	8.57421	1.68811	56.7166	33.9973	46.9432	31.0203	14.6828	26.5537	19.5839
proteinId169143	PCON_04279	SMAC_01278	1.13641	0.142361	-2.98482	0.00677034	-2.13093	0.00167456	-3.22824	0.00017118	-2.52542	0.0043606	2.36994	0.000402358	0.68674	0.775337	3.2914	0.161813	4.2723	1.88623	0.974337	11.5755	1.7059	31.2394	26.6493	71.27
proteinId169202	PCON_10393	SMAC_09076	-0.256397	0.77055	-3.434	3.94028e-05	-4.0966	6.95527e-09	-0.35198	0.999874	-0.0626627	0.998971	-3.31807	1.60195e-05	0.487059	0.858034	17.779	0.79669	8.36623	0.794712	14.396	20.92	18.3107	21.0248	18.7698	0.762933
proteinId171120	PCON_03699	SMAC_05448	0.433884	0.53277	-1.24604	0.104575	0.153109	0.830289	-0.311257	0.999874	-0.571135	0.998971	1.03422	0.106984	-0.365937	0.875796	203.122	45.7062	157.817	51.6144	46.1053	64.8823	39.6264	19.2212	31.328	36.1523
proteinId171267	PCON_09607	SMAC_02899	-1.42779	0.00520585	0.577272	0.42105	1.61242	0.00041123	-0.00554132	0.999874	-0.130262	0.998971	-0.824743	0.111466	0.770475	0.634295	65.6276	53.0816	13.6215	184.875	74.1468	83.9618	70.3055	104.27	70.0621	19.6374
proteinId171808	PCON_08563	SMAC_05016	-3.2584	0.000144054	-2.25034	0.0246233	-1.49276	0.0701101	0.287174	0.999874	-0.235289	0.998971	-2.24363	0.0089004	0.246146	0.95868	120.242	12.6329	6.38549	33.5481	153.597	140.229	108.893	69.6885	72.648	6.33368
proteinId172357	PCON_01935	SMAC_02272	-3.602	1.21093e-17	-0.580526	0.300875	-0.350297	0.409617	0.532903	0.911493	-0.149378	0.998971	2.87904	2.12468e-13	-1.06359	0.21697	30.0115	10.7071	1.35296	51.5306	118.118	91.5711	75.6895	16.9471	42.393	172.353
proteinId172636	PCON_07278	SMAC_08815	-1.03175	0.32742	-0.0617298	0.978722	-0.296038	0.786205	-0.0034998	0.999874	-0.218098	0.998971	-3.8853	3.68778e-05	0.823982	0.811713	18.0127	9.24662	4.71159	27.6334	42.9355	48.5622	37.8788	141.91	95.9385	2.38852
proteinId173692	PCON_10995	SMAC_01950	-3.41754	6.65546e-07	-3.05028	4.06827e-05	0.901406	0.190344	-0.617398	0.999874	-0.564864	0.998971	0.68066	0.362635	0.298628	0.923113	93.6912	5.79135	4.74044	83.96	35.4676	62.3022	38.107	31.1696	31.0792	25.0797
proteinId173852	PCON_14005	SMAC_00493	-5.21956	5.06913e-19	-0.483304	0.298504	1.00189	0.000767003	-0.350164	0.999874	-0.356332	0.998971	1.42084	7.39324e-06	0.0945623	0.958526	18.2819	6.9763	0.225272	60.6587	29.2161	42.0806	30.042	35.202	40.2355	55.4105
proteinId174065	PCON_11489	SMAC_08464	-2.21312	1.287e-05	-1.34124	0.0198398	-2.15836	5.34772e-07	0.49554	0.999874	0.289527	0.998971	1.39499	0.00319931	0.354609	0.840661	10.6895	2.21969	1.25142	9.61661	77.0521	61.2777	68.9833	41.455	44.0272	60.2085
proteinId174089	PCON_06321	SMAC_04867	0.78096	0.403366	-1.44436	0.192607	-0.700654	0.430111	-0.0642945	0.999874	-0.363207	0.998971	1.81646	0.0342657	0.682602	0.822807	16.6559	3.08861	16.7052	36.3695	71.3837	84.2955	59.2917	124.586	92.775	157.979
proteinId17448	PCON_08091	SMAC_04644	-3.88314	8.66416e-09	-0.445005	0.65996	-3.41965	3.8899e-10	-0.664532	0.999874	-0.499084	0.998971	-2.28551	0.000130993	0.706232	0.73564	12.6767	4.93545	0.431098	2.89995	25.0315	45.3173	29.0989	51.189	38.9414	3.59005
proteinId174826	PCON_03205	SMAC_06682	-2.25211	0.0138165	-0.00916691	0.996896	2.12466	0.00957114	-0.425638	0.999874	-0.568266	0.998971	-2.1533	0.0149046	0.368953	0.923113	10.928	5.80504	1.19038	171.252	34.6324	53.2534	32.2356	29.2886	28.1014	2.7182
proteinId175099	PCON_13248	SMAC_02009	-1.53847	NA	0.130373	NA	-2.62043	NA	1.30949	NA	1.79374	NA	0.400203	NA	0.56581	NA	28.9527	17.1381	5.57439	4.90116	98.481	44.1261	143.318	36.3028	29.1842	19.8042
proteinId17543	PCON_11091	SMAC_04885	0.727104	0.0726895	-0.270593	0.676705	-0.228424	0.585127	-0.274378	0.999874	-0.218836	0.998971	0.130226	0.77089	0.171534	0.919877	126.799	56.158	119.198	78.2737	94.1197	128.657	101.097	115.989	120.515	69.4448
proteinId175732	PCON_03220	SMAC_10127	1.92244	0.00145932	3.74268	6.02335e-10	-1.23564	0.0294124	-0.137755	0.999874	-0.479815	0.998971	1.03878	0.523318	0.187121	0.985374	17.3152	133.492	39.3489	23.9571	65.5281	81.4109	53.2262	0	0	0
proteinId175828	PCON_03231	SMAC_08843	-6.14382	3.94135e-28	-0.4611	0.434529	-2.81069	1.78954e-14	-0.00466555	0.999874	-0.18599	0.998971	0.0870871	0.85553	-0.169074	0.923113	38.5631	14.9448	0.268192	7.0548	61.5262	69.6118	56.0383	40.8965	54.27	29.7999
proteinId176477	PCON_04942	SMAC_00001	2.12093	0.00660629	0.896674	0.415715	2.09228	0.00338298	-0.0586578	0.999874	0.31657	0.998971	-0.198386	0.825714	0.0624392	0.99246	55.8854	57.171	146.13	146.116	39.9313	46.9815	54.2992	13.5003	15.7609	7.93572
proteinId176779	PCON_10076	SMAC_02602	-0.312245	0.703689	-0.543993	0.636365	-0.0475799	0.95309	-0.0568637	0.999874	-0.475307	0.998971	0.702152	0.353253	0.631112	0.8059	20.4728	7.40641	9.30813	22.2463	27.5497	32.3288	21.133	33.2096	26.1124	19.9518
proteinId17711	PCON_08152	SMAC_04433	0.859286	0.247379	-1.39708	0.107384	-0.278474	0.715465	0.0778216	0.999874	0.0258132	0.998971	-1.89295	0.00657215	0.741257	0.762972	27.3778	5.38153	28.6907	19.3363	30.8458	32.9508	30.701	23.1385	17.452	2.02228
proteinId177412	PCON_01257	SMAC_02402	0.0595018	0.951405	-0.42458	0.75167	1.88528	0.00630354	0.170708	0.999874	-0.174428	0.998971	-0.550784	0.498068	1.01039	0.667404	12.5751	4.98052	7.49365	124.93	45.699	45.5666	36.8464	246.092	149.176	45.6781
proteinId177825	PCON_13411	SMAC_02448	-1.56633	0.0445366	2.53067	0.0018773	0.147573	0.862742	0.0659429	0.999874	-0.148058	0.998971	2.28147	0.00170774	-0.445761	0.869365	22.474	74.5727	4.14094	29.4712	34.4062	36.988	30.5351	19.4661	33.6933	99.3581
proteinId177934	PCON_06094	SMAC_08244	-0.328813	0.472752	-0.0851672	0.923539	-1.66829	6.61604e-06	-0.596448	0.781939	-0.569341	0.846807	2.39717	1.20493e-09	-0.294026	0.841927	75.0926	37.7979	33.6222	32.1976	84.8451	145.434	89.4237	35.8277	51.451	148.277
proteinId178658	PCON_01252	SMAC_12592	1.88689	6.75524e-05	-1.99735	0.00011277	-1.42266	0.00117139	0.00712249	0.999874	-0.50331	0.998971	1.65907	0.000444473	0.22299	0.913354	79.3939	10.3242	167.378	86.935	296.626	333.316	214.147	24.3182	25.3262	41.4191
proteinId179022	PCON_03279	SMAC_03600	-4.55565	1.74629e-09	0.62113	0.61552	-0.375668	0.659679	-0.718754	0.999874	1.14658	0.785716	0.716942	0.390576	0.24302	0.952671	378.22	309.746	7.81736	114.775	109.813	207.937	435.963	131.233	139.631	130.098
proteinId17988	PCON_14237	SMAC_07053	-0.659801	0.442539	2.27188	0.0103437	0.439838	0.600936	-0.54715	0.999874	-0.405736	0.998971	0.812821	0.326885	0.835327	0.762972	281.735	785.806	100.112	132.925	81.0059	135.593	93.0847	88.7703	60.8551	63.9085
proteinId180224	PCON_08518	SMAC_09283	0.13351	0.780634	1.70088	0.000123544	-0.325035	0.457882	-0.0244386	0.999874	0.40755	0.998971	0.372664	0.406116	0.357858	0.810127	724.73	1290	454.39	75.361	114.935	132.068	161	715.94	758.501	481.912
proteinId18041	PCON_11358	SMAC_01930	0.133245	0.886582	0.455214	0.736822	-1.13126	0.129024	0.161217	0.999874	0.21393	0.998971	-0.50797	0.545601	-0.143334	0.975216	24.1459	17.8996	14.9887	103.896	326.739	327.871	351.271	171.768	254.74	97.6036
proteinId18047	PCON_06063	SMAC_02403	-0.772469	0.320562	-0.288771	0.833875	-0.438526	0.564752	-0.0752567	0.999874	-0.248181	0.998971	-1.93343	0.00645103	0.745795	0.762972	24.0207	10.4241	7.81699	31.0765	49.8222	59.3173	45.4771	84.3666	58.2275	6.92642
proteinId180738	PCON_10170	SMAC_01610	0.612288	0.472598	-0.700409	0.55188	-0.399038	0.6339	0.229706	0.999874	0.224457	0.998971	0.605984	0.4685	0.983447	0.688801	32.4407	10.4291	28.4776	14.6811	28.8373	27.4882	29.7019	59.9783	36.3252	26.084
proteinId180870	PCON_03301	SMAC_00616	0.330431	0.624187	-1.47797	0.0346628	-1.30711	0.0185569	0.463737	0.999874	-0.191238	0.998971	4.28327	3.26917e-14	-0.745153	0.696472	44.546	8.36411	31.7392	33.3048	144.151	116.688	93.5731	12.8133	27.3034	318.781
proteinId182659	PCON_11475	SMAC_01038	0.180077	0.754035	-0.0275171	0.982759	0.265291	0.632112	0.793682	0.682387	0.961283	0.399071	1.49356	0.0026413	1.92588	0.00995951	245.031	130.118	159.373	21.4904	38.2591	24.6672	44.5436	131.558	45.5236	60.9474
proteinId183037	PCON_06542	SMAC_02315	-3.14092	0.000432068	0.849118	0.528601	1.1627	0.189902	0.821921	0.999874	-0.1918	0.998971	5.52566	1.09814e-10	1.10986	0.696472	359.751	363.202	20.0868	810.478	796.325	490.642	392.921	166.196	94.7167	3093.14
proteinId183259	PCON_11913	SMAC_04666	1.26672	0.0271978	-0.345874	0.721309	-2.27546	9.11426e-06	0.15198	0.999874	-0.177539	0.998971	2.63782	1.1953e-06	-0.454509	0.822807	86.6854	36.3217	120.223	3.17024	21.9633	22.2369	18.0166	11.6285	21.2211	73.6865
proteinId183858	PCON_01180	SMAC_02359	-2.56052	0.00183195	-3.1974	0.000408947	-3.19803	1.97596e-06	-0.705079	0.999874	0.338456	0.998971	5.82234	2.83021e-16	0.576824	0.830072	10.3298	0.510811	0.884044	14.5511	108.417	202.292	237.43	15.5267	13.1219	465.148
proteinId183911	PCON_04454	SMAC_04674	0.763444	0.442205	-1.33379	0.279507	0.527346	0.582934	-0.255929	0.999874	-0.506786	0.998971	-1.09135	0.264183	0.779588	0.810127	12.7601	2.55874	12.7734	33.1315	23.6814	32.1784	20.4124	11.112	7.94952	1.51753
proteinId183921	PCON_08758	SMAC_06506	-1.07108	0.00966896	-0.607155	0.26579	-0.418969	0.310349	-0.147369	0.999874	-0.341243	0.998971	1.90002	1.49488e-06	-0.0840077	0.971541	182.171	63.5295	48.4338	128.461	192.855	240.911	174.143	38.5764	49.1004	101.945
proteinId184156	PCON_08753	SMAC_01913	-2.47502	0.00472647	-1.20768	0.301612	0.064509	0.948117	0.626646	0.999874	0.137204	0.998971	-7.0084	2.27005e-14	0.624091	0.841038	28.7181	6.33936	2.6459	11.3809	21.3409	15.2121	15.4566	88.7692	70.5104	0.160078
proteinId184608	PCON_01034	SMAC_04795	0.255568	NA	1.14391	NA	1.80648	NA	0.290306	NA	0.242443	NA	0.844202	NA	0.282785	NA	26.1883	31.3837	17.7156	154.383	66.9046	61.4757	66.9743	73.612	70.6427	64.961
proteinId184669	PCON_06994	SMAC_07258	-1.19899	0.0742977	-0.130247	0.925666	-0.144683	0.845471	-1.29166	0.3634	-0.958858	0.783462	-0.334607	0.659163	-0.58623	0.809329	89.1524	42.7828	21.1091	19.2902	10.5258	29.8116	13.8287	5.69824	10.9159	3.89292
proteinId184779	PCON_13243	SMAC_01839	-6.88096	NA	0.45047	NA	-3.01106	NA	0.0896473	NA	-0.386796	NA	-1.04202	NA	-0.113623	NA	204.38	154.754	0.546664	25.1353	303.323	319.247	219.862	1593.62	2153.39	594.928
proteinId185038	PCON_06983	SMAC_03743	-0.26943	0.819415	-0.386061	0.844834	-3.95205	1.75313e-05	-2.03584	0.342446	-1.55567	0.717396	-3.91658	0.000112519	1.10968	0.762972	9.03732	3.62603	4.21153	1.59504	7.89578	40.3133	11.7033	19.5492	10.8372	0.24228
proteinId185437	PCON_01763	SMAC_05229	1.41773	NA	-0.147386	NA	3.27084	NA	0.125947	NA	0.245574	NA	-0.46506	NA	0.439731	NA	37.2722	18.1041	58.3895	105.059	14.3231	14.7544	16.2019	27.9461	24.3521	9.06261
proteinId185588	PCON_14165	SMAC_02906	-3.63017	3.59443e-07	-0.0210249	0.992722	-1.28111	0.0608041	0.504778	0.999874	-0.0880081	0.998971	1.94939	0.0052747	0.389462	0.890978	84.1818	44.6622	3.51901	11.6278	51.3333	40.3252	34.6749	113.213	107.036	247.945
proteinId185800	PCON_07381	SMAC_05375	4.32866	9.48044e-20	0.168148	0.866021	-0.269179	0.61681	-0.185284	0.999874	-0.657005	0.903692	3.73323	3.66845e-15	-0.24865	0.905437	123.124	73.8662	1468.42	134.311	176.206	226.35	130.753	36.0739	54.6631	363.769
proteinId186364	PCON_04122	SMAC_05012	1.89685	2.35369e-05	-0.376507	0.603957	-2.83722	4.47013e-12	0.226223	0.999874	-0.0309092	0.998971	0.905192	0.0551165	0.00853155	0.99544	18.2838	7.52581	39.0839	3.32742	35.4551	34.0529	30.5726	4.92457	5.89863	5.44977
proteinId187409	PCON_07178	SMAC_06529	-1.86319	0.0135185	-1.45989	0.110264	-1.24275	0.078214	0.814036	0.999874	0.232083	0.998971	-2.72803	0.000197378	0.172642	0.966543	11.1037	2.07618	1.62248	3.65717	19.7777	12.4297	13.4732	8.68581	9.5142	0.605302
proteinId187452	PCON_02755	SMAC_07861	2.27268	4.55659e-06	-0.431966	0.593963	1.65026	0.000533746	-1.04254	0.413924	-1.15001	0.273721	1.38894	0.00709288	1.06894	0.454627	23.0127	9.14969	65.6342	17.1056	3.21556	7.62526	3.11501	20.0177	11.9663	16.1926
proteinId187504	PCON_04193	SMAC_00871	0.671468	0.366679	1.26604	0.141541	-0.639476	0.371285	-1.0579	0.719837	0.570994	0.998971	-0.482037	0.520659	-0.188595	0.959679	74.1319	97.6972	68.2913	7.96378	7.26325	17.4967	24.1922	44.9135	71.9244	26.4785
proteinId18758	PCON_02728	SMAC_02215	0.68053	0.305304	-0.162122	0.897564	-1.14338	0.0478485	0.177164	0.999874	-0.0646606	0.998971	-1.15457	0.0636865	0.83752	0.667404	11.0713	5.30465	10.146	17.2019	54.4555	54.0968	47.5522	24.8149	17.0404	3.48566
proteinId188087	PCON_06826	SMAC_08358	1.29926	0.00949032	1.52579	0.00604238	0.0850077	0.881758	-0.0944127	0.999874	-0.143671	0.998971	-2.69228	2.11412e-08	0.785368	0.597136	41.6929	66.0287	59.7171	34.9225	38.3018	46.1605	38.3467	127.044	98.8925	7.39381
proteinId188362	PCON_07811	SMAC_00875	0.971125	0.231153	0.800722	0.46657	1.72965	0.014328	-0.309613	0.999874	-0.0813521	0.998971	-3.14946	2.03934e-05	0.485251	0.853434	26.2328	25.031	29.9567	89.4	26.0005	36.7074	31.8168	80.0532	70.2413	3.30741
proteinId188383	PCON_04197	SMAC_09331	2.12259	0.000358057	-0.858516	0.29095	-3.50356	5.72114e-11	-0.756322	0.936883	-1.01605	0.574132	2.38986	4.03162e-05	-0.0826439	0.982337	35.8511	10.4789	91.6643	7.51648	64.9153	124.961	55.9215	51.932	65.7083	172.061
proteinId18850	PCON_06789	SMAC_05370	-1.39318	0.00527929	-0.19081	0.839516	0.22378	0.671129	-0.0106091	0.999874	0.133719	0.998971	-4.79016	2.26207e-23	-0.691617	0.650679	43.3975	20.2938	9.20225	138.035	146.969	166.947	168.293	66.1777	121.377	2.30782
proteinId189240	PCON_07816	SMAC_00876	3.82754	1.70536e-26	-0.205221	0.766818	-3.82387	2.73954e-26	0.820469	0.258334	0.239247	0.998971	-4.87762	9.10822e-29	0.176594	0.913354	21.7841	10.2144	180.697	1.41573	43.9279	27.8987	30.2119	25.2116	27.5387	0.455091
proteinId189363	PCON_05760	SMAC_01080	-1.75578	0.00756755	0.0136109	0.99495	-1.86455	0.00155766	0.231709	0.999874	-0.31251	0.998971	-2.10609	0.000795842	0.326539	0.902506	15.6224	8.49618	2.49862	12.1489	66.0593	63.107	46.4355	48.2762	45.6915	4.99428
proteinId189843	PCON_09346	SMAC_04721	-1.32935	0.00809536	-1.20214	0.0393229	-2.72677	3.00056e-10	0.0647582	0.999874	-0.44251	0.998971	2.34274	5.78638e-07	0.0582966	0.986407	36.4625	8.33602	7.97919	12.9303	114.3	123.009	82.6428	25.0693	30.2936	76.2336
proteinId189916	PCON_08984	SMAC_08199	-0.488901	0.617283	-0.852855	0.501779	0.642874	0.481266	-0.686381	0.999874	-1.07328	0.970145	-3.763	6.05929e-06	-2.66265	0.0701264	106.483	30.2351	41.8306	10.8967	5.00424	9.3965	3.90666	89.8514	600.016	22.414
proteinId190928	PCON_09345	SMAC_04720	-2.88924	1.07713e-06	-0.53964	0.555697	1.04046	0.0684797	0.532706	0.999874	0.169302	0.998971	-6.68917	1.89775e-30	0.827839	0.667404	73.1457	26.5707	5.28792	215.521	188.206	145.321	150.442	323.313	212.053	0.890158
proteinId191621	PCON_05765	SMAC_04714	0.445931	0.550416	0.512048	0.632534	2.99726	3.85618e-07	-0.48864	0.999874	-0.438807	0.998971	0.318309	0.674723	0.535444	0.822807	55.4855	43.2196	43.6809	472.021	49.7645	79.6224	53.4931	21.3637	17.1456	12.8246
proteinId191770	PCON_04168	SMAC_04723	-0.816499	0.0750016	1.28429	0.00570661	1.2574	0.000593235	-1.44212	0.00422928	-1.13174	0.0475725	-3.31058	2.30916e-08	0.231461	0.897232	12.3071	16.2687	3.94685	38.4328	7.21825	22.3603	9.28665	8.58194	9.06289	0.412758
proteinId192142	PCON_04180	SMAC_00827	-0.75594	0.362581	1.16209	0.240473	0.308993	0.706205	-1.93929	0.0893687	-2.04837	0.0521039	-4.84085	1.68815e-10	0.406412	0.890978	6.73874	8.45587	2.18221	19.7389	4.85634	22.182	4.64943	49.0424	43.1745	0.666996
proteinId192458	PCON_11106	SMAC_02921	-0.975592	0.335134	0.331392	0.857568	-0.0952339	0.928333	0.41124	0.999874	-0.125937	0.998971	-1.06689	0.278823	0.376771	0.927109	31.5285	21.5372	8.65549	77.8515	142.568	118.833	99.3807	51.2514	48.0355	13.1564
proteinId192680	PCON_05465	SMAC_01772	-0.575619	0.349062	-0.154666	0.893037	0.768735	0.164481	0.126841	0.999874	0.769311	0.871339	1.69742	0.00231408	0.785455	0.667404	90.3226	43.9344	34.3223	87.6367	69.2443	71.254	112.713	75.9664	51.696	83.7815
proteinId19308	PCON_08564	SMAC_05008	0.175238	0.85577	-0.488094	0.731886	0.462042	0.598959	0.0718544	0.999874	0.0175415	0.998971	-1.7707	0.0310483	1.40457	0.548188	55.5775	20.9169	35.6754	52.9332	50.6745	54.1792	50.3609	126.355	53.1382	7.0143
proteinId193330	PCON_14366	SMAC_01825	-1.60459	0.0590106	1.43813	0.167848	1.00948	0.211985	-0.220538	0.999874	0.0291569	0.998971	-1.08666	0.201894	0.294822	0.938953	35.7696	54.6168	6.34261	134.729	69.3769	91.7935	86.1997	78.6358	81.0252	21.3999
proteinId193437	PCON_02994	SMAC_07376	-1.56721	0.000128538	0.423684	0.479357	-0.287219	0.50514	-0.292398	0.999874	-0.294281	0.998971	1.40744	0.000434287	0.276428	0.84651	42.1531	30.4178	7.97449	46.6374	57.8344	80.0762	59.7506	70.061	66.1915	93.0422
proteinId193490	PCON_08807	SMAC_01666	-1.9905	4.78102e-05	-2.03229	0.000122479	2.04449	2.99607e-06	-0.967086	0.369019	-1.53723	0.015459	3.04845	8.67337e-11	-0.913114	0.512733	65.9329	8.36601	9.1943	646.747	97.555	217.426	67.5665	10.0807	22.4988	103.359
proteinId195598	PCON_04656	SMAC_06312	-3.35097	3.89101e-13	-0.526067	0.426824	-1.25091	0.00420885	-0.527953	0.999874	-0.289294	0.998971	-0.565722	0.243143	-0.119006	0.962728	73.8652	27.3759	3.94872	5.93981	11.8754	19.4361	14.5576	71.273	92.8503	33.963
proteinId1963	PCON_13421	SMAC_08794	0.688879	0.0652286	0.671619	0.139892	1.91668	1.12052e-09	0.280844	0.999874	0.267793	0.998971	-0.0360134	0.932849	-0.63466	0.538828	25.6954	21.9791	23.5051	166.405	66.6266	61.7353	68.3531	12.8536	23.5223	12.0981
proteinId19658	PCON_12204	SMAC_01148	-0.495842	0.318515	-1.26051	0.0171337	-2.08274	3.90397e-06	1.59226	0.00543949	1.70562	0.0018794	1.60464	0.000376344	-0.45088	0.783125	97.5036	21.3733	38.9094	2.39586	38.9096	14.3294	43.6222	20.4508	34.196	57.8213
proteinId19662	PCON_12019	SMAC_01372	0.589017	0.595807	-0.54329	0.756578	-4.05083	1.00287e-05	-0.362657	0.999874	-0.432554	0.998971	-3.5217	0.000231726	1.05028	0.762972	17.1249	6.11848	15.2342	0.578569	10.8935	16.0767	10.6985	155.696	89.6632	2.94306
proteinId196718	PCON_14359	SMAC_06716	-2.50316	0.000610423	-4.73113	2.46158e-10	-0.669967	0.37371	-0.454534	0.999874	0.5866	0.998971	-1.71957	0.0226253	0.101268	0.982337	168.064	3.04352	16.2511	239.864	354.142	551.928	773.198	12.0025	15.186	2.1519
proteinId197749	PCON_13759	SMAC_09146	-1.45115	0.00621858	-1.25232	0.0401073	1.81632	3.42221e-05	0.530433	0.999874	0.134334	0.998971	1.20465	0.0134549	-0.269744	0.890978	13.309	2.94392	2.7265	816.061	414.07	321.252	324.442	40.0606	58.642	67.9075
proteinId198366	PCON_10490	SMAC_02774	-2.37947	0.00199318	-0.562971	0.642072	1.01302	0.165571	1.25403	0.586027	0.877836	0.998971	0.386448	0.641326	-0.163114	0.970641	12.3046	4.45322	1.24482	15.493	22.8896	10.4612	18.0384	35.6372	49.7982	30.4676
proteinId199094	PCON_08112	SMAC_04294	-4.34326	1.34321e-08	-0.748025	0.497244	-4.51016	2.62514e-10	0.201582	0.999874	0.0554634	0.998971	4.83558	1.06724e-11	-0.284028	0.932376	39.5108	12.3281	0.953924	0.515736	19.924	19.4579	18.5283	16.8535	29.1919	492.548
proteinId199168	PCON_08103	SMAC_04297	0.235998	0.736883	1.41338	0.0489592	-0.137364	0.840435	-0.318774	0.999874	-0.606237	0.998971	1.54196	0.00935298	-0.0271219	0.994019	5.91338	8.64828	3.93525	54.8486	59.7618	84.4973	50.314	79.5564	96.6743	139.356
proteinId199319	PCON_10499	SMAC_03029	-2.70761	0.000140884	-1.38973	0.107382	-0.48093	0.506575	0.623659	0.999874	0.0196464	0.998971	0.96778	0.174674	0.254307	0.93557	15.528	3.06006	1.23247	46.8858	130.736	94.4029	87.8781	90.5341	86.89	85.9863
proteinId199684	PCON_01014	SMAC_06403	0.701972	0.395439	-6.90871	3.30855e-09	-3.13479	5.17779e-06	0.727976	0.999874	-0.363989	0.998971	2.96843	4.63338e-05	-0.011019	0.995626	11.451	0	10.7361	4.0291	82.0987	54.8997	38.7468	33.8771	41.5571	166.933
proteinId199710	PCON_05307	SMAC_09135	-1.08903	0.140528	1.23124	0.16513	3.01678	1.18769e-06	0.309122	0.999874	0.533361	0.998971	-0.586771	0.440171	0.654436	0.795517	39.3897	52.2245	10.6016	289.125	52.8919	47.8512	64.374	39.0244	29.6195	10.07
proteinId199739	PCON_01021	SMAC_09332	-1.55438	0.00953577	-0.36364	0.720077	0.57853	0.334687	-0.116506	0.999874	-0.143058	0.998971	1.20249	0.0448234	-0.758592	0.68882	47.7105	19.8499	9.0194	59.2947	46.0332	56.3799	46.7867	5.40801	11.1489	14.6576
proteinId199827	PCON_14258	SMAC_07052	-7.80897	1.61874e-16	-0.503849	0.687804	-1.59298	0.0244193	1.08732	0.781924	1.81254	0.131497	2.65048	0.000288133	0.167075	0.969182	59.7959	22.2384	0.06833	12.7276	107.666	55.5887	187.54	35.0821	38.405	119.074
proteinId199877	PCON_04818	SMAC_05388	-2.9088	5.74909e-09	-0.51211	0.485638	-0.0206718	0.970151	-0.216425	0.999874	-0.160879	0.998971	-1.03251	0.0402176	0.0880105	0.975844	33.6655	12.482	2.43677	34.6345	37.5247	49.3117	40.2329	97.3068	111.255	26.4926
proteinId200348	PCON_12537	SMAC_02117	-4.43917	3.48422e-09	0.469831	0.712682	-1.09945	0.127478	-0.0879668	0.999874	-0.144722	0.998971	0.768239	0.32973	0.372226	0.904268	48.3138	36.2825	1.09096	39.9374	102.686	123.245	101.962	52.7332	50.3489	40.1779
proteinId200907	PCON_12535	SMAC_02116	-5.19699	1.64068e-12	0.942942	0.340696	-0.575157	0.443455	0.0709794	0.999874	-0.0622012	0.998971	-6.48351	1.07903e-14	1.17174	0.584868	90.201	93.8821	1.15449	116.673	230.97	247.375	217.281	65.9767	33.0959	0.114829
proteinId20095	PCON_14201	SMAC_00776	1.20228	0.00119603	-0.885313	0.0486815	0.397946	0.283866	0.43734	0.979684	0.199041	0.998971	2.38607	4.00029e-11	-0.120512	0.951294	72.3122	20.9748	95.5654	136.386	175.032	145.294	153.703	13.0303	18.799	47.1042
proteinId200990	PCON_11021	SMAC_04126	-0.902924	0.0470854	-0.660766	0.261254	-3.14271	1.10883e-15	0.134217	0.999874	-0.00465991	0.998971	-2.97355	2.37494e-12	0.452612	0.766174	49.9446	16.9011	15.1046	4.48954	54.2778	55.6457	50.909	56.1045	49.957	3.28261
proteinId201039	PCON_01268	SMAC_02427	-5.21182	1.77303e-08	0.507713	0.729577	1.84837	0.019054	0.283665	0.999874	0.160416	0.998971	-1.169	0.181249	1.12426	0.667657	51.5537	40.1685	0.504721	369.111	150.89	138.368	143.006	359.456	212.769	50.7804
proteinId201993	PCON_04672	SMAC_00124	2.23151	1.84176e-07	0.12394	0.891158	0.394022	0.388269	-0.150075	0.999874	-0.20695	0.998971	3.02164	8.99278e-13	0.307355	0.84651	32.8135	19.255	89.6745	28.2786	24.1558	30.3014	24.0613	15.0127	15.6767	67.7928
proteinId202197	PCON_07101	SMAC_01810	-3.98765	1.86019e-16	-0.410949	0.555697	0.151287	0.768114	-0.0543923	0.999874	0.453665	0.998971	-0.272944	0.587706	0.209791	0.913354	41.0623	16.608	1.41988	10.4455	11.2003	13.128	16.5223	23.5259	24.6963	10.2938
proteinId202347	PCON_07053	SMAC_04768	1.579	NA	-8.12846	NA	-3.17473	NA	-4.43469	NA	-4.64369	NA	3.24335	NA	0.554673	NA	288.74	0.224592	524.946	54.0635	25.7222	854.147	22.6212	59.9397	49.2701	260.184
proteinId202447	PCON_04722	SMAC_00910	-2.13355	0.0405374	-1.36761	0.320875	-3.73531	9.19401e-05	-0.25209	0.999874	-0.256625	0.998971	-1.42271	0.174199	-0.0660682	0.994019	23.5477	4.54147	2.71945	0.612938	10.0051	13.6172	10.3199	50.3562	66.4366	10.277
proteinId202623	PCON_04386	SMAC_04345	0.108424	0.896243	-0.908888	0.334029	-2.39248	0.00012593	-0.184593	0.999874	-0.242893	0.998971	-4.31096	1.65153e-10	-0.00239183	0.998035	117.305	32.8064	71.7776	23.5735	139.451	179.495	138.456	71.7324	89.5761	1.85741
proteinId202708	PCON_04385	SMAC_04349	-1.41966	0.18074	-0.0146351	0.996377	0.236319	0.837268	-0.0148137	0.999874	-0.488442	0.998971	0.265623	0.817887	0.73686	0.841038	21.6619	11.5207	4.25757	18.7951	19.6768	22.4017	14.3074	9.96839	7.01309	3.80437
proteinId203003	PCON_04365	SMAC_02779	-3.69931	8.88043e-08	-0.338087	0.792876	3.38745	5.97943e-08	2.05925	0.0323164	2.04573	0.0314325	2.63203	0.000122898	0.514437	0.841038	118.201	49.8087	4.68135	927.652	459.8	118.586	470.319	25.236	23.3085	84.9627
proteinId203094	PCON_04335	SMAC_00465	2.42459	0.000571448	0.146188	0.923539	-4.72142	5.94756e-13	0.0239168	0.999874	-0.126928	0.998971	2.636	0.000137147	-0.252907	0.940038	199.059	119.252	647.276	3.47301	124.364	137.648	115.683	56.5761	94.6616	331.055
proteinId203809	PCON_04366	SMAC_00470	2.10117	1.22127e-05	0.157482	0.873237	0.134338	0.806664	-0.748462	0.719837	-0.00336855	0.998971	1.16615	0.0183129	-0.683539	0.667404	34.8688	20.6917	86.0695	66.5693	44.4554	84.9879	77.6923	6.58665	13.344	16.805
proteinId205072	PCON_13188	SMAC_12091	-2.50849	0.000169227	-1.10504	0.202998	0.441538	0.529699	1.29826	0.373544	0.61934	0.998971	3.99684	3.23875e-10	-2.24902	0.0355095	175.062	41.9675	16.0945	692.556	1602.82	716.02	1023.01	9.40515	57.1831	574.6
proteinId206628	PCON_02958	SMAC_09256	-0.770031	0.331106	-0.225005	0.879636	0.810353	0.267562	-0.280643	0.999874	-0.556819	0.998971	0.0689578	0.935827	0.316952	0.919877	33.3249	15.1924	10.7709	47.175	26.8259	37.0045	22.7794	29.1692	29.2346	14.0799
proteinId206821	PCON_04877	SMAC_07195	-5.2101	2.25535e-09	-1.22431	0.266843	0.528636	0.545816	0.0657683	0.999874	-0.365538	0.998971	1.34579	0.11168	-0.067233	0.99246	46.2673	10.2112	0.540368	44.5078	39.8274	42.8126	30.129	15.0196	20.6771	31.246
proteinId207035	PCON_04892	SMAC_01724	1.42015	0.125176	-0.895942	0.501973	-0.0356932	0.970456	0.198954	0.999874	2.60406	0.024339	-2.51856	0.00329926	0.860732	0.776083	1.81017	0.486858	2.88436	8.96756	13.1507	12.827	77.6712	173.238	111.842	8.37584
proteinId207134	PCON_04765	SMAC_07309	-3.17525	1.62163e-06	-0.253794	0.813688	0.272833	0.648577	-1.75717	0.0140443	-2.49999	4.07912e-05	6.94922	5.6851e-40	0.359503	0.858034	6.30528	2.80834	0.340449	62.865	18.8712	73.6676	11.5742	4.82965	5.06135	313.127
proteinId207492	PCON_09473	SMAC_09217	-0.21834	0.85044	-0.916377	0.534484	-2.47088	0.00643519	-1.11418	0.999874	-0.987157	0.998971	-3.52452	0.000206679	1.32886	0.667404	12.5499	3.379	6.04403	3.89026	12.8729	33.1781	14.612	152.607	70.3586	2.34849
proteinId20754	PCON_08223	SMAC_07041	2.28249	0.0165779	-1.11369	0.402068	-5.39177	4.2411e-09	-0.881189	0.999874	-0.883904	0.998971	-1.12586	0.254776	0.126105	0.982421	47.9513	11.2851	144.695	0.404086	16.9339	36.5543	17.4424	32.5243	37.289	9.56713
proteinId207915	PCON_04904	SMAC_04393	-0.783489	0.428935	0.309726	0.861013	-1.96588	0.0190636	-0.00813934	0.999874	-0.318827	0.998971	-0.48601	0.622946	0.553471	0.860879	16.3434	10.883	5.11953	5.67036	29.0193	32.8839	23.929	48.5106	40.6998	12.8008
proteinId208101	PCON_08583	SMAC_02019	1.20227	0.0484927	-2.81333	1.01336e-05	0.228243	0.72638	-0.813938	0.848113	-0.22353	0.998971	2.57556	6.90308e-06	0.265365	0.917839	15.852	1.13382	20.9864	58.5835	34.957	70.1193	54.6787	16.5646	16.3031	49.7796
proteinId20851	PCON_05681	SMAC_02792	-0.618888	0.100972	0.404326	0.43404	-2.6657	1.06362e-16	0.340809	0.999874	0.0624058	0.998971	-0.0570704	0.893279	0.174274	0.909866	164.11	116.239	60.0654	11.7416	119.295	105.912	101.423	97.7791	102.027	50.6853
proteinId210021	PCON_09878	SMAC_07065	-3.07403	6.99251e-09	0.199711	0.847069	-0.988948	0.051482	0.216518	0.999874	0.0606549	0.998971	-1.96102	0.000330767	-0.306172	0.883223	65.1224	39.8969	4.15179	17.5719	50.4025	48.814	46.7166	9.95232	14.8214	2.0017
proteinId210083	PCON_10081	SMAC_04484	0.524764	0.121732	-0.74221	0.0564848	-1.53953	1.06885e-07	0.0686711	0.999874	0.0749055	0.998971	-0.094136	0.803798	0.214807	0.851332	48.4525	15.4035	39.5496	13.1124	50.1954	53.9854	52.132	19.2457	21.6395	9.98196
proteinId21103	PCON_02313	SMAC_02885	1.29795	0.0421424	0.989147	0.228746	0.197406	0.779315	0.143837	0.999874	0.37235	0.998971	0.353421	0.6091	-0.0964159	0.97968	657.534	719.746	947.372	75.1732	88.677	90.3517	108.103	327.124	504.065	325.233
proteinId212454	PCON_09765	SMAC_07837	4.16478	NA	-7.66352	NA	4.37917	NA	-5.61681	NA	-3.61704	NA	1.66643	NA	-1.22242	NA	23.0347	0.0180285	248.982	2483.09	2.62888	163.471	11.4176	13.9156	41.2862	65.8473
proteinId212868	PCON_14249	SMAC_06014	-1.56614	0.0510724	-0.804233	0.47227	1.26705	0.086305	-0.281918	0.999874	-0.594978	0.998971	-4.84578	7.45383e-08	0.601252	0.828265	38.9527	11.7349	7.19021	27.3452	11.241	15.5374	9.3233	36.0982	29.441	0.334618
proteinId213573	PCON_09237	SMAC_00112	-0.458531	0.489905	-0.27105	0.808157	-0.403607	0.518842	0.1899	0.999874	0.162475	0.998971	0.365805	0.575702	-0.830095	0.662986	9.06501	4.016	3.70364	7.40835	13.9505	13.7495	14.1571	5.83229	14.3108	8.5438
proteinId213661	PCON_07721	SMAC_08989	-3.09804	0.00643038	-5.75159	1.63466e-06	6.49934	7.87362e-11	-3.57275	0.0142582	-7.30984	5.2432e-10	-6.26787	4.69218e-08	0.910452	0.820453	110.63	0.692997	5.98529	16183.9	12.2478	208.117	0.649903	78.5085	50.4052	0.140008
proteinId213944	PCON_14247	SMAC_06015	0.737361	0.141496	0.287671	0.729004	-3.88872	4.55674e-15	-0.604737	0.942611	-0.17984	0.998971	0.628124	0.210096	-0.421657	0.809329	31.59	20.7939	30.1666	1.21313	15.4485	26.6699	21.5401	11.5033	16.5938	14.7069
proteinId214119	PCON_07744	SMAC_06993	1.10796	0.249263	0.00610771	0.997355	0.0787741	0.938925	0.00852268	0.999874	-0.152694	0.998971	-1.57712	0.0856909	0.472479	0.899897	23.5412	12.6854	29.9078	47.396	56.4588	63.2357	51.8187	51.4099	44.9361	6.36639
proteinId214145	PCON_13899	SMAC_00690	-0.546007	0.217037	-0.622505	0.257579	-2.65047	2.5435e-13	-0.186917	0.999874	-0.296627	0.998971	-2.22948	8.49571e-08	-0.309689	0.835216	15.1639	5.2677	5.85057	6.07593	42.4457	54.4715	40.6168	7.43159	11.3141	1.15787
proteinId2142	PCON_04090	SMAC_06806	-1.00699	0.0919876	-0.934909	0.209289	-0.799798	0.13736	0.465316	0.999874	-0.0990893	0.998971	-6.7137	7.42837e-13	0.209427	0.935041	11.9778	3.31618	3.30372	47.0214	144.865	117.561	100.618	16.5263	18.7834	0.0333254
proteinId21434	PCON_11643	SMAC_07877	1.00492	0.232737	-0.447771	0.750781	0.370465	0.667717	-1.07802	0.853064	-1.09164	0.845041	-1.96218	0.0124329	-0.230367	0.956926	21.8128	8.47108	25.5119	24.7596	10.8465	26.7268	11.1092	29.2459	43.2913	4.70387
proteinId215463	PCON_09973	SMAC_08643	0.9792	0.0849213	1.67681	0.00612227	-2.94709	2.25873e-07	1.47987	0.0653646	0.798078	0.79581	-2.61142	5.78638e-07	-1.17646	0.392711	14.6904	25.9703	16.746	0.859985	22.6807	8.97734	14.5034	42.9819	127.377	9.41723
proteinId215629	PCON_08220	SMAC_04462	2.70621	0.00629683	-1.07822	0.445977	-1.15012	0.245792	0.257902	0.999874	0.138074	0.998971	-3.45081	0.00034901	1.48591	0.638121	19.789	4.7505	83.4069	9.13293	31.6503	29.4441	29.9392	138.204	56.9945	1.92123
proteinId215760	PCON_09995	SMAC_00163	2.38359	0.00346843	-1.51174	0.141798	-0.533068	0.536864	-0.258642	0.999874	-0.304265	0.998971	-0.687801	0.433191	-1.90579	0.311423	25.6138	4.51982	80.9078	62.7529	95.1839	129.609	95.3003	39.4333	190.836	69.3355
proteinId216440	PCON_11727	SMAC_07413	-0.822124	0.0815652	0.838877	0.141464	2.23784	2.45392e-08	0.865924	0.396259	0.702923	0.716255	-0.869377	0.0587073	-0.5619	0.696472	96.157	92.9664	30.3016	215.59	103.479	63.4441	95.5819	53.4189	96.2	27.7869
proteinId2177	PCON_09301	SMAC_00174	1.84082	0.000869401	2.39364	4.63505e-05	-0.861922	0.109607	-0.0101822	0.999874	-0.141291	0.998971	0.528328	0.379593	-0.0513308	0.989753	236.684	687.43	491.789	77.5748	175.958	199.966	165.986	22.291	30.1848	23.3168
proteinId21781	PCON_08629	SMAC_05746	-2.61653	4.82805e-12	-0.0690797	0.931633	-0.357	0.33835	0.597402	0.625169	0.00378604	0.998971	-0.0457924	0.917684	-0.174164	0.913354	49.1373	25.0893	4.39847	84.7076	205.699	152.775	140.485	28.8365	37.5184	19.0699
proteinId217923	PCON_10986	SMAC_02046	-1.77655	0.00766487	2.21652	0.00230124	-0.785313	0.233248	0.0715414	0.999874	0.576888	0.998971	-2.2639	0.000460325	1.04125	0.610647	1170.94	3067.21	188.394	93.2419	211.966	227.396	314.448	1033.1	665.479	70.8557
proteinId218606	PCON_11351	SMAC_04056	-0.897213	0.351407	0.898498	0.488032	-0.971829	0.276785	-1.31588	0.750777	-1.21522	0.859181	-7.80696	7.79425e-19	-0.609653	0.84651	29.268	30.1761	8.49659	24.6175	23.4511	69.3081	26.0609	119.275	209.769	0.381507
proteinId218661	PCON_03573	SMAC_00164	0.914117	0.242248	-1.12066	0.249707	-2.93759	1.41142e-05	-0.43566	0.999874	-0.433535	0.998971	0.14705	0.862985	0.377073	0.902403	42.7585	10.2788	47	1.89292	13.6048	20.977	14.1091	110.093	99.1984	52.5245
proteinId218778	PCON_05282	SMAC_01566	0.683135	0.374212	0.0589292	0.972448	-0.159502	0.843387	-0.466838	0.999874	-0.385671	0.998971	0.525036	0.495322	0.372521	0.899525	105.043	58.4583	96.6603	60.5873	59.922	94.4673	65.7247	53.9963	52.4898	43.5755
proteinId219092	PCON_13138	SMAC_03026	-2.2815	2.95641e-06	0.63707	0.344953	-1.29968	0.0039335	0.00192132	0.999874	-0.016844	0.998971	0.591714	0.251738	-0.155878	0.950145	46.625	39.0202	5.31638	22.2327	68.8789	77.5772	70.3082	22.2827	31.5831	25.8018
proteinId219736	PCON_01053	SMAC_03294	-2.64226	0.00043056	-3.21281	6.25369e-05	1.46496	0.0404753	-0.787436	0.999874	0.746592	0.998971	4.31225	2.39539e-09	0.94411	0.696472	247.261	13.325	21.2175	117.31	29.1414	58.0552	91.1169	160.761	97.0845	1028.29
proteinId220264	PCON_07402	SMAC_03289	-3.10206	1.22661e-05	-1.09742	0.0953696	-1.90609	7.21602e-06	-0.0153871	0.999874	0.564758	0.964139	-2.65511	2.55939e-09	-0.430347	0.790398	5.4183	1.32299	0.310391	2.53011	11.3837	12.9741	17.6681	17.7606	29.9595	2.36323
proteinId220854	PCON_09105	SMAC_02128	-2.1083	5.1621e-05	-2.10268	0.000206104	0.0986968	0.87016	-0.0161968	0.999874	-0.229939	0.998971	-0.260823	0.660022	-0.326726	0.860879	52.1129	6.41645	6.78436	36.9487	42.661	48.5918	37.9301	25.7554	36.2154	16.3609
proteinId221064	PCON_11004	SMAC_02186	-1.28787	0.256319	-1.21191	0.420637	0.00253213	0.998482	0.810897	0.999874	0.163456	0.998971	-5.53138	1.11659e-07	0.266862	0.964332	160.347	33.9892	33.9892	160.136	368.965	227.294	235.387	92.922	94.8789	0.773972
proteinId221563	PCON_03442	SMAC_04419	-5.03849	NA	-5.13344	NA	-1.99505	NA	1.25709	NA	2.24966	NA	-2.59787	NA	1.27109	NA	47.5859	0.577377	0.645206	6.55604	87.9918	39.5076	187.802	91.028	43.8356	2.96539
proteinId22258	PCON_04337	SMAC_00306	-1.62828	0.000690292	0.355333	0.619197	-0.543666	0.273468	-0.247775	0.999874	-0.25653	0.998971	-2.5098	7.73313e-09	0.0373345	0.991863	31.1043	21.4392	5.66964	5.41185	7.89487	10.6035	8.13643	46.494	57.4276	4.80405
proteinId222758	PCON_13440	SMAC_04153	-3.45955	0.000100148	-1.00426	0.427457	-0.5775	0.539033	0.166506	0.999874	-0.0102859	0.998971	-6.03852	1.34315e-12	1.28739	0.641507	9.73515	2.49575	0.420397	19.6282	42.6956	42.5962	38.6966	165.767	79.1378	0.424128
proteinId222919	PCON_13437	SMAC_04097	3.02543	1.8051e-07	-0.614189	0.485382	-0.196706	0.768452	-0.206655	0.999874	-0.329483	0.998971	-4.47166	6.42663e-14	0.920398	0.627012	17.5176	6.08787	85.4881	25.6936	31.7885	41.5351	30.136	47.5625	30.1447	0.586737
proteinId224118	PCON_08666	SMAC_07003	0.0304551	0.974855	-0.382037	0.76301	-0.853315	0.224381	0.595054	0.999874	0.649075	0.998971	-0.0468757	0.955857	-0.494082	0.843651	272.125	111.391	158.307	36.997	127.832	94.0194	137.481	56.8487	101.259	56.0414
proteinId224944	PCON_12950	SMAC_01347	-1.06952	NA	-0.145108	NA	-0.19362	NA	-0.287375	NA	-0.550585	NA	0.792633	NA	0.0941277	NA	30.3297	14.6812	8.11404	117.644	136.11	187.644	117	22.1734	26.4053	22.6085
proteinId225354	PCON_08492	SMAC_04040	2.18818	0.0110357	-2.3529	0.0229984	-2.70963	0.000461402	0.88468	0.999874	-1.30764	0.717396	-5.65661	2.82947e-12	-0.900271	0.762972	7.74768	0.701263	21.647	11.167	188.477	112.359	39.6277	97.9606	226.695	2.16609
proteinId226190	PCON_02674	SMAC_03383	-0.110828	0.802048	-1.04273	0.0179312	-1.30879	0.000127867	-0.0350354	0.999874	-0.743582	0.349371	-0.304677	0.45574	0.322096	0.811608	27.2748	7.06899	14.343	24.2864	72.8521	84.0144	45.9424	113.931	112.022	47.4421
proteinId227536	PCON_03558	SMAC_07070	-0.684374	NA	1.46848	NA	-0.584053	NA	0.203068	NA	0.124591	NA	0.565179	NA	0.270231	NA	24.3298	36.5707	8.51716	52.5084	114.191	111.571	111.604	31.055	32.3732	23.0934
proteinId228160	PCON_08865	SMAC_04669	-2.07676	0.0614513	2.43009	0.0576921	-1.3631	0.25839	-3.89018	0.0449369	-4.13397	0.0220014	-2.278	0.0411687	-0.039323	0.994019	30.6677	99.9685	3.79008	0.580495	0	2.69652	0	3.03531	4.0405	0.316592
proteinId228650	PCON_11851	SMAC_06597	-3.09089	NA	-0.0233518	NA	1.11897	NA	1.40733	NA	1.18158	NA	0.948814	NA	0.161392	NA	36.1422	19.2145	2.33413	80.2453	122.585	51.4568	108.109	31.4952	34.9129	35.1631
proteinId22872	PCON_09617	SMAC_07437	-1.04022	0.0358058	0.475506	0.498856	0.708785	0.12234	0.31493	0.999874	0.625244	0.900906	3.19688	3.18712e-12	0.0114729	0.995399	39.9997	30.0904	11.0409	90.2264	85.7808	77.5261	110.504	10.655	13.4029	60.2683
proteinId229610	PCON_06598	SMAC_00699	0.251613	0.767492	1.64693	0.0631408	-2.21352	0.00237524	0.229131	0.999874	1.38912	0.428519	-2.07773	0.00431683	-0.234217	0.950145	8.81399	15.4728	6.01477	0.343817	2.15064	2.05703	5.13709	135.501	193.186	25.1707
proteinId229704	PCON_06370	SMAC_07538	-1.91956	0.0282236	-0.180775	0.921274	0.693479	0.434421	0.0880758	0.999874	0.121685	0.998971	0.317702	0.746022	0.241386	0.959473	99.7627	46.9396	14.0721	177.723	144.357	152.582	153.352	154.764	171.045	121.345
proteinId230355	PCON_10793	SMAC_01423	-2.74397	9.79717e-05	-1.0558	0.254231	2.23553	0.000361472	-1.20687	0.53138	-0.891321	0.926951	1.44046	0.0382791	-0.462699	0.848673	30.0774	7.55588	2.38552	257.606	27.5558	73.8553	35.7679	30.1134	52.5991	82.9552
proteinId230439	PCON_11834	SMAC_04034	-0.189642	0.863292	0.099507	0.965945	-0.915739	0.328716	0.560426	0.999874	-0.510254	0.998971	-4.66893	1.5277e-07	-0.491449	0.896276	9.71641	5.58778	4.7983	10.3778	38.1812	28.5195	17.984	44.9613	80.6948	1.51192
proteinId230858	PCON_04695	SMAC_03230	-3.42897	5.99549e-05	0.812967	0.442194	-2.07464	0.00274788	0.350462	0.999874	-0.00589559	0.998971	-2.15791	0.00796213	-0.875653	0.742398	14.7044	14.187	0.67225	5.05234	35.5357	31.0981	28.5244	5.39706	14.0487	1.29477
proteinId230952	PCON_04676	SMAC_00123	-1.13531	0.137733	0.834518	0.414583	-1.87693	0.00472219	2.04604	0.0407569	2.31106	0.0114143	1.98854	0.00535315	-0.0527756	0.992727	24.7123	24.0624	6.15929	14.5388	298.004	77.4689	372.657	9.46371	12.5983	29.9674
proteinId231476	PCON_01286	SMAC_06094	-2.50228	4.64373e-06	0.191136	0.857996	0.342317	0.550448	0.199358	0.999874	-0.0917364	0.998971	-2.20443	3.52725e-05	0.404918	0.834983	43.2421	26.4587	4.16803	50.1748	56.5633	55.3527	47.695	59.4731	53.4929	5.46797
proteinId231554	PCON_09253	SMAC_00358	-1.14653	0.0738335	1.55206	0.0314729	-1.01754	0.085536	0.52008	0.999874	0.119477	0.998971	0.837822	0.193975	0.611187	0.779363	67.0299	108.1	16.7401	47.69	178.026	138.686	138.535	32.3418	24.3304	21.5216
proteinId231580	PCON_09244	SMAC_05558	-3.45093	2.10537e-11	0.662217	0.30383	-2.30717	4.22484e-08	-0.160957	0.999874	-0.401128	0.998971	-4.42875	1.4443e-18	-0.190262	0.927769	12.5744	10.7896	0.607467	9.54901	53.7023	67.7369	46.9306	14.6039	20.8498	0.433311
proteinId231710	PCON_09252	SMAC_00160	-2.81735	1.90305e-10	0.00926463	0.99495	0.318186	0.472326	0.220803	0.999874	-0.0942699	0.998971	1.28277	0.00218447	0.328825	0.830072	42.8892	23.0278	3.33985	106.529	125.243	120.962	104.112	69.5216	68.2325	89.5653
proteinId232278	PCON_13123	SMAC_02995	0.913597	0.175521	-0.885459	0.303718	2.39998	2.76831e-05	0.244051	0.999874	0.0260317	0.998971	-0.550205	0.424637	-1.74064	0.157333	439.099	125.974	477.733	781.018	212.043	200.461	188.01	43.2567	222.061	73.4516
proteinId232827	PCON_01300	SMAC_08068	-0.195915	0.749754	-0.115409	0.91906	-1.29391	0.00837794	-0.128311	0.999874	-0.374819	0.998971	3.41184	1.47973e-11	0.678556	0.688801	29.8191	14.6329	14.7546	43.9195	123.379	152.132	107.055	72.4922	56.4712	308.617
proteinId232915	PCON_10749	SMAC_05014	-2.17116	0.000574672	1.09674	0.174278	1.78893	0.00190776	1.02111	0.632664	-0.172308	0.998971	-0.0160906	0.982799	1.26823	0.472872	103.278	121.377	12.4455	868.886	646.406	351.465	286.149	236.478	110.319	54.5729
proteinId233180	PCON_02385	SMAC_02956	4.41774	1.11831e-07	-1.1844	0.308625	-0.989006	0.25311	-2.29468	0.0747425	-2.44218	0.0399372	-1.90222	0.0287583	1.24694	0.64219	48.0151	10.9163	672.279	11.5723	5.41976	32.8357	5.01716	41.2961	20.5079	2.27971
proteinId233723	PCON_02274	SMAC_00446	-0.121766	0.895278	1.20289	0.230657	1.34759	0.0639634	0.509306	0.999874	0.178599	0.998971	2.01857	0.0074891	-0.595229	0.828265	363.435	472.248	192.452	66.8337	45.4032	35.4004	37.0411	38.7508	71.6337	181.186
proteinId233953	PCON_08407	SMAC_04369	1.43706	NA	0.642563	NA	2.23094	NA	0.172251	NA	-0.00353267	NA	-3.28616	NA	0.20443	NA	174.957	149.442	279.845	306.38	90.8226	90.4604	82.9233	10.78	11.9225	0.476714
proteinId234577	PCON_10771	SMAC_00495	0.839664	0.173212	1.92869	0.00256807	-1.12979	0.0390703	-0.115081	0.999874	0.0939996	0.998971	-0.476255	0.448067	0.972607	0.572056	18.1644	37.9448	18.5638	14.2667	36.2186	44.3594	43.373	48.812	28.3696	10.0857
proteinId2347	PCON_04529	SMAC_02000	1.48342	0.0337318	-0.0369614	0.982759	-1.96186	0.00169681	-0.0300409	0.999874	-0.383962	0.998971	-0.352817	0.644974	0.46162	0.84651	14.9694	7.79909	24.4661	19.6111	95.7736	110.189	76.8733	41.9169	36.1487	13.3325
proteinId234852	PCON_03965	SMAC_01562	2.71032	5.7508e-10	-2.57631	1.07164e-07	1.29051	0.00175849	-0.241543	0.999874	-0.967268	0.256908	2.23102	3.80571e-07	0.545732	0.723795	46.994	4.10184	181.144	307.103	131.78	176.21	82.0391	32.4136	28.9561	67.8275
proteinId234934	PCON_08448	SMAC_05866	-1.29381	0.0984053	0.925774	0.37748	3.82982	1.00589e-08	-0.186552	0.999874	0.160209	0.998971	0.286909	0.739258	0.185721	0.964332	517.768	536.48	114.325	1177.16	83.0301	107.013	110.511	123.441	137.861	97.1574
proteinId234982	PCON_09196	SMAC_05211	0.101612	0.896148	0.582643	0.55188	-1.05864	0.08683	0.189209	0.999874	-0.134968	0.998971	-4.31275	7.73224e-12	-1.17667	0.51451	74.1342	60.2523	45.3013	19.9238	59.6045	58.602	48.9528	25.8558	64.0801	1.6973
proteinId235070	PCON_09444	SMAC_08973	1.6872	0.0475424	-1.09492	0.340659	3.17736	2.11754e-05	-5.14695	4.9325e-07	-4.61116	1.8922e-06	0.941349	0.282113	0.792854	0.788469	14.5361	3.55583	28.4007	193.244	0.462592	27.7091	0.779188	42.4812	28.5774	26.6856
proteinId235386	PCON_02947	SMAC_00259	-0.967679	0.188439	-0.167026	0.908324	0.287101	0.707622	-4.566	1.55946e-09	-0.420175	0.998971	0.0678329	0.933019	-0.893735	0.680253	46.3558	21.6498	12.9155	18.8297	0.687151	21.5467	14.6613	104.201	229.98	139.23
proteinId235595	PCON_07755	SMAC_08061	0.870629	0.434852	-0.856573	0.589307	-0.575362	0.600429	0.255655	0.999874	-0.119369	0.998971	-2.44803	0.0154947	0.805347	0.823683	19.5761	5.51301	21.2459	6.83954	15.5452	14.465	12.1562	35.6115	24.5153	1.76302
proteinId235879	PCON_11583	SMAC_01180	-3.69665	2.20237e-12	1.53154	0.0143998	5.88639	6.06216e-36	0.222904	0.999874	0.751375	0.861809	-4.62758	4.66316e-18	-0.322009	0.874853	1332.09	2118.38	55.7519	7535.71	176.374	169.947	264.994	109.021	161.127	3.36287
proteinId236018	PCON_11579	SMAC_01841	-4.37914	6.05557e-08	-0.638559	0.501011	4.13492	3.86116e-14	-0.465181	0.999874	-0.419534	0.998971	3.26993	4.92199e-08	-0.51232	0.817449	15.7282	5.38319	0.312803	441.95	21.66	34.0737	23.1295	13.1117	21.9391	118.777
proteinId236653	PCON_09803	SMAC_08053	-1.54681	0.0305325	-0.625866	0.558739	2.06578	0.00125022	-2.84253	0.000372232	-2.64424	0.00134249	-2.04829	0.00311144	0.41571	0.871922	1262.05	427.807	234.059	1284.41	47.9108	415.773	57.2341	257.583	263.591	31.8387
proteinId239090	PCON_01049	SMAC_08055	-4.22055	0.000537042	-2.16933	0.164644	-2.52062	0.0307833	-6.46013	8.57381e-07	-3.60547	0.0286665	-3.86665	0.00280983	0.603952	0.907355	205.688	21.7209	4.68186	15.4773	0.856151	153.049	8.77561	10.657	8.50944	0.116573
proteinId239280	PCON_07550	SMAC_02887	1.11409	0.177839	0.916833	0.404974	-0.815411	0.303695	-0.043881	0.999874	-0.0169419	0.998971	1.60103	0.0458237	0.139847	0.976029	29.8924	31.3082	38.3324	18.9657	41.2762	48.0413	43.5311	4.81207	5.28611	10.2639
proteinId240281	PCON_10451	SMAC_00501	-4.19901	9.23086e-08	-1.83632	0.0575039	1.04615	0.191118	-0.94791	0.991071	1.26439	0.708239	2.83665	0.000334453	0.299896	0.93557	6620.49	925.701	178.738	216.334	61.7993	139.135	319.142	191.84	222.161	881.294
proteinId240424	PCON_10443	SMAC_00370	-2.8791	2.87056e-07	0.41354	0.632983	-2.27692	3.14015e-06	-0.666703	0.943657	-0.380459	0.998971	0.633455	0.261813	-0.735155	0.667404	25.6127	18.405	1.90986	6.6722	25.1958	45.5309	31.9181	10.6431	22.9539	18.8384
proteinId240437	PCON_05856	SMAC_04902	-1.38952	0.107954	-0.176355	0.919317	1.11019	0.166384	-0.113851	0.999874	-0.485054	0.998971	0.827468	0.341427	1.18293	0.643329	13.1956	6.21886	2.6588	58.1782	30.1301	36.8776	23.7978	49.6308	26.623	21.9524
proteinId240548	PCON_09172	SMAC_08069	-1.60187	0.0200834	0.25349	0.846347	1.32685	0.0348342	-0.0864715	0.999874	-0.0693898	0.998971	-5.53943	1.46237e-16	0.174214	0.962421	18.1885	11.7843	3.29873	48.7233	22.1682	26.587	23.1794	45.4336	45.8483	0.418157
proteinId240685	PCON_08241	SMAC_05786	0.269941	NA	-1.17816	NA	-1.30215	NA	0.4065	NA	-0.158653	NA	-3.27239	NA	0.602709	NA	23.7633	5.5366	16.2996	27.1589	113.011	95.4142	78.3024	50.4097	40.7354	1.87206
proteinId241512	PCON_05175	SMAC_01680	-0.212431	0.737406	0.555871	0.489566	2.64821	4.56419e-08	-0.674703	0.957499	-0.300182	0.998971	-4.11002	1.03093e-12	-0.068472	0.985991	25.2699	20.134	12.4658	263.833	31.7819	57.8077	42.9327	25.4171	33.516	0.977527
proteinId241585	PCON_10736	SMAC_08490	-1.82983	0.000166054	0.221326	0.811006	2.26196	2.34829e-07	1.13006	0.194724	1.53285	0.0163806	-0.245204	0.658309	0.0603723	0.985991	641.436	404.787	101.442	652.625	366.807	186.404	503.726	468.058	561.825	254.207
proteinId241701	PCON_13053	SMAC_07903	-3.20624	1.91114e-07	0.176518	0.887509	-1.74532	0.00202573	-0.744934	0.96758	-2.25268	0.0021854	2.59192	1.45468e-05	0.421687	0.84651	81.9794	50.3383	4.77333	60.7464	152.429	290.949	54.0768	61.8322	65.3316	206.046
proteinId242424	PCON_04479	SMAC_01624	2.61666	NA	3.39852	NA	2.72391	NA	0.296609	NA	0.5726	NA	1.30129	NA	0.193792	NA	29.9935	185.642	112.618	328.992	73.9517	67.4183	93.4144	75.5135	84.6112	114.989
proteinId242972	PCON_08913	SMAC_04065	-2.73891	0.00267455	-1.56857	0.179205	0.602374	0.535321	1.2367	0.86388	0.925195	0.998971	1.20724	0.203125	0.225611	0.964332	137.785	24.3223	10.8448	11.2055	21.687	9.80718	17.8606	27.0526	24.9531	31.6442
proteinId24326	PCON_07366	SMAC_05240	0.458299	0.60866	-0.610848	0.629959	-1.82879	0.0129252	0.344379	0.999874	-0.158462	0.998971	0.676583	0.426845	-0.0436007	0.994019	103.328	35.6203	81.4803	45.1492	265.666	233.665	190.828	180.815	232.332	221.505
proteinId24386	PCON_04446	SMAC_01503	-2.37079	5.05204e-07	-0.150602	0.874053	0.0792458	0.88337	-0.0410931	0.999874	-0.0147671	0.998971	-1.08469	0.0217406	0.893842	0.502174	49.7883	23.9785	5.24645	73.8479	84.7834	98.3625	89.3096	125.014	79.8665	18.7637
proteinId243912	PCON_06632	SMAC_06946	2.67822	0.000529403	0.969052	0.373475	-1.78673	0.0152641	-0.329093	0.999874	-0.300593	0.998971	-2.77786	0.000390494	-0.00233826	0.998035	19.2065	20.6196	74.5856	4.20689	14.7463	21.0823	15.5778	15.2533	19.3659	1.14237
proteinId244219	PCON_06640	SMAC_03108	-2.86672	6.49417e-07	-1.40223	0.0390548	-0.336936	0.581187	0.552568	0.999874	0.178076	0.998971	3.96726	2.40337e-13	-0.547849	0.786865	43.86	8.75365	3.2238	48.478	113.324	86.4567	89.9211	53.3273	96.5283	878.898
proteinId244358	PCON_12314	SMAC_06198	1.65069	0.0109382	-0.460628	0.662792	0.739845	0.247784	-0.248806	0.999874	-0.0868463	0.998971	-0.287907	0.696339	-0.581816	0.8059	36.5877	14.109	66.8962	83.3442	51.9552	70.062	60.3776	9.11754	17.2171	8.06363
proteinId244482	PCON_11670	SMAC_07864	-0.0824198	0.889664	-1.16086	0.0484248	1.13872	0.0118612	0.597647	0.957671	0.0141135	0.998971	-1.07071	0.0469489	0.474453	0.79491	11.7466	2.78065	6.29883	11.8117	10.0341	7.4259	6.89689	3.98039	3.50546	0.774228
proteinId24540	PCON_08800	SMAC_03246	-0.206489	0.68388	-0.82851	0.137643	0.462947	0.303061	-0.377143	0.999874	-0.809371	0.469727	-0.603404	0.190136	0.606687	0.667404	88.3959	26.5926	43.6256	46.871	32.0508	47.1018	24.4661	143.565	112.154	36.9749
proteinId245521	PCON_12829	SMAC_08289	-3.45897	3.5961e-06	0.590023	0.625325	-1.02324	0.16747	1.47513	0.374212	0.868062	0.998971	-1.34336	0.0817349	-1.09436	0.643312	96.0042	78.9669	4.4713	71.1403	536.616	209.034	358.861	42.7534	113.566	25.3667
proteinId24607	PCON_08799	SMAC_03936	0.882117	0.0379102	-0.214943	0.776521	0.533637	0.190011	0.378716	0.999874	0.256206	0.998971	0.890417	0.0342897	-0.0231926	0.994019	48.4416	22.3149	51.0184	66.4066	73.9642	63.9798	70.1977	23.4441	29.1963	29.7209
proteinId246794	PCON_10963	SMAC_04499	-1.926	5.5792e-05	0.438503	0.54007	0.135252	0.796224	-0.0539606	0.999874	0.0385467	0.998971	1.83074	6.06274e-05	0.1158	0.964332	34.1185	24.7469	4.95185	77.8915	84.2541	98.6044	93.1408	33.9706	40.6811	78.1275
proteinId247469	PCON_11825	SMAC_04377	0.141121	0.84154	0.541828	0.55188	-2.1465	7.0433e-05	-1.13019	0.413924	-1.39367	0.162055	0.284397	0.673547	-0.71721	0.719682	176.088	138.269	110.006	22.7781	57.5066	144.732	49.3161	27.3917	57.1817	38.7247
proteinId247680	PCON_06504	SMAC_04827	0.920581	NA	0.0126105	NA	-0.641585	NA	-0.596671	NA	-0.870927	NA	-3.09421	NA	0.127965	NA	3.79081	2.05253	4.18572	8.00337	10.1526	17.5385	8.60878	30.8769	34.246	1.74726
proteinId247997	PCON_07525	SMAC_01582	-0.326592	NA	0.84504	NA	1.8988	NA	-0.279895	NA	-0.199392	NA	0.988237	NA	0.487295	NA	102.312	99.8152	46.2455	719.543	192.262	264.108	210.589	153.714	135.515	151.448
proteinId24824	PCON_13778	SMAC_02295	-3.00167	0.000129859	-0.399476	0.780592	-0.265424	0.763173	0.12049	0.999874	-0.0838396	0.998971	1.15293	0.15606	-0.400162	0.902506	74.6528	30.0295	4.79699	104.614	175.036	180.811	156.382	47.1188	75.9012	103.07
proteinId248403	PCON_13263	SMAC_01630	0.98414	0.0287199	-0.222666	0.78297	0.418334	0.349815	-0.576973	0.895409	0.0706249	0.998971	-0.0825034	0.872487	0.170916	0.93008	20.2654	9.20122	22.8755	112.847	69.3572	117.298	112.757	45.3552	52.1625	24.2936
proteinId248529	PCON_11258	SMAC_05907	-0.508334	0.60562	-1.09085	0.36673	-2.16155	0.00699396	0.67177	0.999874	-0.107691	0.998971	-0.270169	0.784042	0.491486	0.882664	8.93666	2.14163	3.46622	8.07973	78.181	54.0669	45.8526	44.1457	39.4223	14.5473
proteinId248731	PCON_10866	SMAC_06548	-1.51506	0.00695671	0.348403	0.694083	2.29533	6.96065e-07	0.594289	0.999874	0.823017	0.68307	-1.43224	0.005281	-0.845201	0.581293	14.3057	9.79442	2.77483	46.1897	17.2924	12.813	20.9976	27.0063	58.4797	10.6162
proteinId249026	PCON_10852	SMAC_02967	-0.942865	0.101921	-0.374621	0.682444	-3.78824	3.3552e-14	0.656768	0.974838	-0.095525	0.998971	3.03598	8.21793e-09	-0.469771	0.811713	58.8264	24.192	17.1543	2.55406	71.3056	50.4954	43.336	21.1965	36.1715	172.447
proteinId249864	PCON_10632	SMAC_03831	-5.05276	2.96399e-35	-0.0891248	0.919317	0.395629	0.352121	0.848241	0.334469	1.92775	2.21793e-05	2.25431	1.60451e-08	0.490431	0.72937	212.802	107.805	3.47094	102.853	176.7	109.776	389.827	106.784	86.8388	223.744
proteinId250026	PCON_02132	SMAC_07517	-2.71527	0.00384389	0.528215	0.748024	-2.66634	0.00170581	-0.890604	0.999874	-0.658952	0.998971	-0.0780238	0.942772	0.606174	0.850301	32.8063	25.8754	2.48371	6.82156	30.47	66.1754	37.4407	72.6053	58.262	32.7081
proteinId250161	PCON_02969	SMAC_00670	0.683238	0.218223	-1.13272	0.0737521	-2.83089	8.0628e-10	-0.0253805	0.999874	-0.283983	0.998971	-7.20369	4.22135e-34	0.5374	0.764713	17.1564	4.13178	15.7902	5.74416	51.046	58.5097	43.9673	81.2853	64.3382	0.199147
proteinId250606	PCON_06721	SMAC_03223	-4.61249	3.25423e-15	-2.13694	0.000570856	-1.92858	0.000191865	-1.72295	0.0235795	-1.32329	0.16225	3.72831	4.70951e-12	-0.276515	0.908319	70.2093	8.32963	1.4885	10.7717	15.4294	58.8817	21.1858	32.5157	51.237	386.247
proteinId250922	PCON_07314	SMAC_05328	-3.01605	1.11698e-05	-0.492285	0.663451	0.980989	0.143868	0.0340236	0.999874	-0.212078	0.998971	0.00708128	0.993391	-0.0367865	0.994019	75.2547	28.6069	4.90619	447.742	285.112	313.241	247.57	100.519	129.112	73.8045
proteinId251746	PCON_06703	SMAC_04326	-0.708073	0.445653	0.113402	0.955138	-1.40977	0.0930057	-4.97669	2.5354e-06	-5.58392	1.44045e-07	1.9402	0.0213805	-0.550613	0.852573	183.326	108.478	62.8158	3.56169	0.227246	13.7032	0.118644	64.345	122.586	281.343
proteinId252363	PCON_10622	SMAC_06513	-2.16178	8.78668e-09	-0.479345	0.368029	-1.85669	4.54952e-08	0.00664433	0.999874	0.119633	0.998971	-4.09348	6.46138e-23	0.439117	0.743811	241.132	93.3466	30.494	43.0518	196.897	220.874	220.855	50.4924	46.4697	1.31307
proteinId25240	PCON_13171	SMAC_02268	0.554806	0.142361	-0.0618363	0.93819	2.91246	1.52374e-21	-0.467685	0.895409	-0.0984716	0.998971	-3.69755	9.77243e-06	-0.586445	0.682444	38.994	19.9907	32.4534	405.856	48.2159	75.392	64.6355	1.92783	3.72511	0.0890239
proteinId252651	PCON_02087	SMAC_01416	3.02221	1.70268e-07	0.649304	0.462693	-3.93961	3.28049e-13	-1.86336	0.0122128	0.215951	0.998971	0.73495	0.224504	1.46321	0.218047	2.10506	1.8036	10.3377	0.843271	4.545	19.2446	20.4679	19.2483	9.71197	7.86071
proteinId252656	PCON_02075	SMAC_06922	-3.62514	2.0448e-07	0.770588	0.397554	-1.213	0.0569391	-0.690718	0.999874	-0.401104	0.998971	0.551768	0.425708	-0.259398	0.926296	34.4976	32.2628	1.43626	4.23222	7.27951	13.4591	9.26559	53.7078	76.4579	64.3099
proteinId252853	PCON_02052	SMAC_05727	-1.94542	0.00966778	0.0107779	0.996377	1.29079	0.0627533	-0.299761	0.999874	-0.59607	0.998971	1.63027	0.0247362	1.0472	0.643329	30.9215	16.6441	4.28708	80.4582	32.1668	45.0406	26.9047	366.765	203.427	312.828
proteinId252932	PCON_02147	SMAC_06444	0.484359	0.516013	0.288233	0.818605	-3.80567	3.48789e-09	0.194869	0.999874	0.606457	0.998971	2.10379	0.00128948	0.655423	0.779773	46.7049	31.0079	37.586	0.683302	14.2766	13.9926	19.7873	98.7762	71.6411	157.397
proteinId253618	PCON_02082	SMAC_06542	0.0427461	0.976653	-0.688292	0.715546	-1.8066	0.0909162	-0.12107	0.999874	0.211426	0.998971	-3.37561	0.00179596	0.801398	0.841038	9.88007	3.13006	5.75582	3.79738	16.3144	20.1146	21.7313	88.2521	60.699	2.08067
proteinId253770	PCON_13972	SMAC_09488	3.09681	0.00641316	-4.74981	8.26793e-05	2.71973	0.00998172	0.693404	0.999874	-0.323289	0.998971	-1.9953	0.0836778	0.857641	0.830072	116.191	1.52195	683.472	1426.42	411.882	275.079	197.445	97.7668	63.0133	5.89834
proteinId254574	PCON_12880	SMAC_07189	1.55264	0.0076619	-0.331517	0.748597	-0.71225	0.211263	0.226497	0.999874	-0.131439	0.998971	-1.5268	0.00856845	0.464179	0.822807	13.4823	5.72955	23.0497	18.1288	43.6254	41.8707	34.9964	15.1689	12.175	2.11546
proteinId254963	PCON_02606	SMAC_02368	-0.493708	0.445794	0.098403	0.938688	-0.408237	0.509185	0.623317	0.999874	0.402942	0.998971	0.0136239	0.984073	0.598354	0.770809	18.628	10.7434	7.43758	16.6388	42.6553	30.8411	37.6698	35.281	28.1699	13.5456
proteinId255250	PCON_02600	SMAC_01182	3.55752	4.05705e-16	-0.348048	0.639984	1.33433	0.00136626	-0.182163	0.999874	-0.354201	0.998971	-2.88248	1.06041e-08	0.0265877	0.994019	36.9389	15.5952	256.065	101.082	43.5189	55.7622	39.945	8.5837	10.1901	0.638289
proteinId256028	PCON_08577	SMAC_02767	-0.402333	0.284925	-0.343652	0.505458	0.171759	0.64826	0.697383	0.34953	0.425903	0.970673	2.09177	3.1426e-10	0.474134	0.667404	44.4167	18.8209	18.9875	51.8707	93.4608	64.6446	79.9395	46.7801	40.343	92.365
proteinId257571	PCON_10516	SMAC_04788	0.466555	0.393019	0.640954	0.354575	-2.43382	5.7401e-08	-0.0948571	0.999874	0.149246	0.998971	0.248188	0.662413	0.73289	0.641507	348.767	290.855	273.917	20.9325	133.825	161.49	164.489	75.9807	51.7543	31.7174
proteinId258254	PCON_02626	SMAC_00637	-1.19572	NA	-0.410959	NA	-2.78019	NA	1.20621	NA	0.547955	NA	1.10883	NA	0.61838	NA	1086.53	431.642	255.608	364.227	8382.84	3901.83	5352.13	1126.39	926.273	1215.38
proteinId258356	PCON_02619	SMAC_04250	1.56565	0.137522	-0.264578	0.899316	1.35018	0.162605	-4.50601	7.33356e-05	-5.05321	4.76378e-06	-1.39778	0.170205	0.974771	0.775653	1.84337	0.812692	3.40672	26.1472	0.396314	13.6273	0.266318	125.665	75.3667	12.1904
proteinId258632	PCON_02494	SMAC_04895	0.0828075	0.939111	-0.506526	0.738971	-1.90191	0.0176994	-0.147905	0.999874	-0.311049	0.998971	-3.88976	2.25622e-06	0.181022	0.970852	3.11673	1.16046	1.9012	2.22783	9.7481	12.2347	8.95408	41.9448	50.6252	1.30325
proteinId260145	PCON_04821	SMAC_01472	-6.03739	5.09208e-11	-5.46373	1.54476e-08	0.299736	0.781211	1.62638	0.570247	2.9844	0.015645	0.434297	0.686529	-0.0188097	0.995399	1156.9	10.6844	7.32236	13.7317	44.2827	14.9146	124.832	147.053	189.951	153.097
proteinId261177	PCON_12219	SMAC_04222	-4.79279	1.61634e-07	-1.74912	0.131438	-3.47267	3.62466e-05	1.81346	0.371051	1.20145	0.923302	3.08474	0.000653745	0.347251	0.933796	83.5354	12.3625	1.32588	5.84735	344.686	102.635	227.981	55.2774	55.1611	308.144
proteinId262258	PCON_09005	SMAC_03393	-5.92579	NA	0.966622	NA	-2.60188	NA	0.265782	NA	0.587121	NA	-1.00813	NA	-0.634578	NA	38.8318	41.0224	0.281724	7.62382	72.2078	67.4518	94.0244	36.0779	64.7299	17.128
proteinId262454	PCON_12551	SMAC_03376	-0.913263	0.120173	0.504876	0.546095	-2.41378	7.07286e-07	0.422388	0.999874	-0.0766095	0.998971	1.58482	0.00289649	-0.574111	0.762972	13.8405	10.6826	4.10574	9.18299	83.8817	70.1317	60.9991	16.2742	28.8706	48.8368
proteinId26263	PCON_10066	SMAC_02420	-0.124393	0.855607	-1.03474	0.162616	-0.644309	0.259848	-3.11599	2.22265e-07	-3.07209	2.97855e-07	3.79899	2.95785e-12	0.057518	0.989753	33.6556	8.58564	17.3053	59.9305	12.925	132.993	13.8016	20.3782	25.3785	202.289
proteinId262719	PCON_12527	SMAC_04896	-0.362358	0.546253	-1.63436	0.00729414	-0.202431	0.729773	0.234844	0.999874	0.286235	0.998971	-0.803195	0.147743	0.30537	0.881494	23.8476	4.03371	10.4265	20.5219	34.7792	33.2161	37.2239	13.2434	12.3653	3.49781
proteinId26274	PCON_10485	SMAC_03031	3.27175	0.000376376	2.48587	0.020622	-1.20427	0.190476	-0.472998	0.999874	-0.601925	0.998971	-2.82465	0.00206926	1.0529	0.749676	25.5303	85.1993	161.374	20.1157	42.1907	67.4941	39.7918	106.903	61.0735	3.3898
proteinId26286	PCON_13541	SMAC_04073	-0.296508	0.514117	-0.371305	0.54858	-3.9996	9.31327e-28	-0.221805	0.999874	-0.500211	0.94366	1.67825	1.49547e-05	0.139923	0.941493	14.5275	6.00101	6.65856	2.04899	34.4047	45.3031	29.2814	11.692	13.736	21.4225
proteinId262881	PCON_01122	SMAC_08583	-3.78759	8.6756e-09	-0.64161	0.500974	-3.85493	1.15181e-11	1.14031	0.505168	0.240331	0.998971	4.51669	1.50612e-13	0.361952	0.886318	43.2622	14.6977	1.59811	19.8395	852.999	426.958	465.398	37.7303	38.9747	522.818
proteinId26354	PCON_01851	SMAC_08308	1.75738	1.22583e-05	-0.262392	0.718386	-0.998308	0.00671163	-0.56987	0.796189	-0.380483	0.998971	0.863993	0.0312406	-0.266187	0.848841	11.5038	5.11819	22.4023	29.0993	48.7881	82.0372	57.5343	25.7414	38.7248	35.5752
proteinId263698	PCON_08336	SMAC_05055	1.00649	0.166409	-0.284441	0.831629	1.01893	0.130936	0.44528	0.999874	0.618122	0.998971	0.705252	0.340026	1.25061	0.523074	35.2158	15.3189	40.9324	13.515	11.1949	9.16768	13.1441	32.9719	16.551	12.9177
proteinId263894	PCON_12533	SMAC_03877	-1.68671	6.62712e-06	1.26835	0.00232128	-0.658541	0.0678712	-0.23951	0.999874	-0.374154	0.998971	0.240172	0.565345	0.105867	0.959679	135.828	176.043	23.4634	71.6953	118.586	157.964	111.553	70.1467	79.0009	48.5245
proteinId264030	PCON_12532	SMAC_03767	-2.5425	3.53869e-05	-1.19634	0.0988428	-3.83829	3.40346e-12	-0.0557852	0.999874	-0.122991	0.998971	0.477778	0.438831	-0.254312	0.918017	29.9685	6.90202	2.74023	1.56547	29.0222	34.0361	28.6015	56.1943	87.1262	65.3642
proteinId264482	PCON_02887	SMAC_05428	-2.00632	1.87556e-07	0.283128	0.643904	0.669801	0.0591241	0.653188	0.527695	0.269472	0.998971	2.52445	1.92127e-12	0.757555	0.472872	23.3962	15.287	3.2642	69.2048	85.0454	60.7947	67.242	26.1323	20.3246	57.1394
proteinId264698	PCON_02877	SMAC_01695	-0.172798	0.817056	-1.43537	0.0623235	-2.43062	2.33337e-05	1.81952	0.0407569	0.390657	0.998971	-0.722811	0.283693	0.486819	0.830072	34.2492	6.60925	17.2372	11.4174	291.183	89.9044	109.078	68.969	55.3331	16.5077
proteinId266019	PCON_03445	SMAC_03293	-3.29956	1.39653e-05	2.01776	0.0178793	0.620236	0.41885	-0.287478	0.999874	-0.277989	0.998971	-5.07468	1.74814e-12	1.04297	0.658801	25.3298	58.6465	1.32401	35.4409	23.1931	32.1348	24.1814	107.328	69.4594	0.796795
proteinId266061	PCON_12327	SMAC_09175	1.32721	0.079909	-3.1032	0.0002712	-0.209538	0.795508	1.81188	0.112318	1.0122	0.836744	2.29483	0.00121612	0.44442	0.863065	8.59198	0.442321	12.7504	877.253	4749.29	1464.48	2770.11	61.6136	52.6487	133.132
proteinId266358	PCON_08007	SMAC_09364	0.611776	0.602968	0.183971	0.936011	2.14475	0.0288074	-0.802088	0.999874	-0.83156	0.998971	-6.76338	8.98656e-10	0.667705	0.853434	14.8754	9.13844	13.2986	61.8332	9.00041	18.5506	9.06794	30.6619	23.1411	0.0411268
proteinId26649	PCON_07898	SMAC_06836	1.42246	0.00456535	-0.926785	0.142115	-1.08976	0.0197358	-0.241862	0.999874	-0.755136	0.753023	2.44909	3.29722e-07	0.00168209	0.998035	96.5736	26.9034	149.891	30.0004	67.8224	90.7161	48.8971	41.3156	53.5711	161.571
proteinId266564	PCON_13605	SMAC_02408	3.1571	6.65546e-07	0.495254	0.639379	-2.12389	0.00039303	-0.0898175	0.999874	-0.0629596	0.998971	1.05536	0.116683	-0.971619	0.638121	23.623	17.7702	125.431	7.12921	37.8523	45.6805	39.8827	11.7871	28.8642	29.3351
proteinId267261	PCON_07021	SMAC_05999	1.17622	0.118977	-0.556761	0.632534	-1.53085	0.0238565	-0.425904	0.999874	-0.319846	0.998971	-0.245657	0.766625	1.03113	0.651012	60.1289	21.6306	79.0828	26.4088	71.5762	109.58	79.9409	231.077	123.876	52.9533
proteinId267332	PCON_05922	SMAC_08323	-6.0191	6.713e-19	0.599236	0.57988	0.707066	0.31772	0.0921305	0.999874	-0.0084784	0.998971	0.23204	0.77089	0.34047	0.907752	1216.56	1008.45	9.00008	3152.84	2546.46	2685.18	2453.76	583.691	661.665	394.294
proteinId267431	PCON_06238	SMAC_03298	5.19526	3.59455e-13	-3.02361	0.000438085	-1.29575	0.0700888	-7.41527	1.17703e-16	-6.46163	1.76554e-15	-3.89007	9.06119e-08	-0.559333	0.833552	8.94994	0.527759	210.129	7.49607	0.089301	26.6193	0.223588	23.0416	42.9246	1.22524
proteinId267950	PCON_06240	SMAC_07581	-3.5859	1.71319e-07	-0.689276	0.486488	0.405132	0.572643	0.110991	0.999874	0.132998	0.998971	-0.522003	0.475571	-0.124708	0.975216	28.2441	9.26848	1.17548	87.2262	88.6058	92.254	92.9684	30.8202	39.2964	14.7976
proteinId268133	PCON_14289	SMAC_08298	0.828247	0.355711	0.0789097	0.969603	1.03729	0.204103	-1.38317	0.594456	0.0729401	0.998971	-2.32343	0.00442195	-0.842772	0.770757	51.7065	29.7022	53.6058	72.3635	15.5678	48.1332	46.5084	58.4018	133.619	14.4807
proteinId268212	PCON_05287	SMAC_08547	1.15687	0.215091	-1.35063	0.244393	-3.86918	1.14863e-06	0.278666	0.999874	-0.415509	0.998971	-0.0782897	0.940125	0.918232	0.762972	62.0049	12.3352	81.6563	1.66201	40.7729	37.4711	25.3068	124.776	78.5148	33.4914
proteinId268771	PCON_14329	SMAC_08749	-3.87377	1.90176e-12	0.519368	0.450058	-2.31982	3.39011e-08	-0.236313	0.999874	-0.514989	0.998971	1.8846	3.8574e-05	0.212461	0.917839	24.9233	19.186	0.866042	29.1784	156.084	207.493	132.926	44.8477	48.7581	89.3472
proteinId269418	PCON_03020	SMAC_08748	-1.60795	0.00273594	-0.936316	0.166718	-1.5102	0.00182424	0.709603	0.870245	-0.29742	0.998971	2.54368	4.79244e-07	-0.0519659	0.989753	51.205	14.2142	9.35363	24.3074	143.312	97.8796	72.8536	40.1164	51.3729	171.089
proteinId269493	PCON_03180	SMAC_08605	1.20594	0.32425	-2.63899	0.0488911	-1.05581	0.366728	-0.0504407	0.999874	-0.763611	0.998971	5.36077	9.30345e-07	0.159212	0.982337	354.5	25.2206	500.591	424.878	1147.69	1343.49	693.595	2.7088	3.05967	89.4853
proteinId269609	PCON_09376	SMAC_06421	-2.47814	2.29391e-05	-1.27705	0.0705881	-2.61961	7.01422e-07	-0.65319	0.999874	-0.611721	0.998971	2.04397	0.0002976	0.639685	0.762972	27.4882	5.92893	2.68451	3.8032	19.0707	34.1957	20.2207	120.821	89.5073	193.568
proteinId269670	PCON_09384	SMAC_08302	-1.60157	0.000512897	-0.695038	0.230304	-2.70587	1.31485e-12	0.52963	0.919914	0.2126	0.998971	3.05899	6.39597e-15	-0.176357	0.923113	16.8694	5.54477	3.09989	4.81545	55.3583	43.0482	45.9295	17.6562	25.9923	113.834
proteinId27005	PCON_04647	SMAC_05574	1.45933	0.0593037	1.01127	0.322114	-4.56611	5.08011e-08	-0.289775	0.999874	-0.0334168	0.998971	-4.9279	6.90308e-06	-0.132899	0.976489	25.3875	27.9869	40.8185	0.221014	5.9758	8.30367	7.43492	4.33233	5.40403	0.0355418
proteinId271929	PCON_12092	SMAC_02170	0.373856	0.642982	-1.28059	0.158027	-0.891777	0.200271	0.15702	0.999874	-0.302008	0.998971	-3.59379	1.20068e-07	-0.123137	0.976029	14.763	3.15821	10.9385	44.1851	116.672	117.433	86.8319	99.4268	133.22	4.67112
proteinId272033	PCON_12435	SMAC_06228	-0.0169775	0.983499	-0.27253	0.810341	-0.866634	0.139986	-0.707511	0.983136	-0.894428	0.769508	1.07571	0.0734615	0.501055	0.812864	8.17096	3.63117	4.5935	4.78091	6.56238	12.2371	5.94426	100.152	85.1395	86.9733
proteinId273054	PCON_12103	SMAC_08543	-0.32654	NA	0.107974	NA	-0.940354	NA	-0.895985	NA	-1.43267	NA	3.24298	NA	0.651013	NA	33.8816	19.5113	15.1983	28.5959	36.9865	79.047	26.2634	26.2831	22.5446	108.446
proteinId273484	PCON_01033	SMAC_08138	0.19802	0.863286	-1.45227	0.259155	0.746057	0.46112	0.0202902	0.999874	-0.100001	0.998971	-2.21121	0.0226209	0.832216	0.810127	35.1427	6.37702	23.054	38.6763	28.4143	31.5727	26.8852	71.0956	47.603	4.10132
proteinId273533	PCON_01347	SMAC_08196	-2.71529	0.00188162	-0.149641	0.936599	-1.8363	0.0214924	0.641686	0.999874	0.149077	0.998971	1.25876	0.15147	0.440119	0.900996	6.25697	3.00506	0.484188	5.00394	37.5341	26.4872	27.1023	27.4699	23.8629	27.8331
proteinId274085	PCON_08033	SMAC_01629	-2.23684	0.00512854	-0.842583	0.459925	0.0545743	0.95168	0.820605	0.999874	0.673861	0.998971	1.20714	0.137099	1.27598	0.584868	40.0527	11.6544	4.47424	27.1078	58.1962	36.1933	54.0971	339.291	164.797	180.033
proteinId27634	PCON_09414	SMAC_00723	2.93357	1.10847e-11	0.641921	0.290742	1.8777	2.8633e-06	-0.0459643	0.999874	-0.0615565	0.998971	2.29127	2.30158e-07	0.485747	0.762972	67.4076	56.8677	300.05	276.729	89.7639	104.605	91.8627	13.0375	10.1377	26.9063
proteinId28293	PCON_08257	SMAC_01210	0.519429	0.494157	1.17283	0.181771	-1.43947	0.0249328	0.520996	0.999874	0.0764718	0.998971	-1.64957	0.0153736	0.479986	0.843651	20.3089	25.2512	16.8549	12.441	62.8922	48.8727	47.3665	123.655	104.492	15.315
proteinId286279	PCON_02228	SMAC_06128	0.83107	0.124426	0.649047	0.36673	-0.127422	0.829625	-0.600733	0.992726	-0.386865	0.998971	2.07009	3.13061e-05	0.501017	0.782175	57.7952	49.1646	59.2027	16.5466	14.614	25.195	17.5866	44.728	40.561	93.5343
proteinId286419	PCON_08303	SMAC_04442	0.717214	0.662662	1.7699	0.316905	-1.84539	0.0200929	0.710399	0.999874	0.18379	0.998971	-0.138501	0.889029	1.11746	0.672734	0	0.788284	0	14.3751	115.719	77.9242	81.7471	251.121	137.664	57.0787
proteinId286629	PCON_04856	SMAC_05330	-3.92845	2.83044e-10	1.56569	0.0281213	1.24833	0.0300566	0.254704	0.999874	0.345229	0.998971	-0.132487	0.852789	0.121499	0.972532	412.923	678.099	14.1143	340.11	212.285	199.686	234.989	252.99	319.932	148.342
proteinId286887	PCON_01817	SMAC_01027	-1.96811	0.000145027	1.06361	0.0465118	2.20916	1.29684e-08	0.129522	0.999874	0.168749	0.998971	0.0947276	0.853498	-1.08014	0.270644	24.7377	28.1951	3.47981	54.7366	15.8918	16.363	16.8884	12.3615	35.1152	17.5831
proteinId287067	PCON_09161	SMAC_04282	-0.743551	0.235282	-1.67195	0.0124498	-0.871449	0.124868	0.711063	0.96758	0.13333	0.998971	-0.763026	0.280805	-0.632751	0.782175	3569.11	586.792	1190.46	997.057	3837.2	2611.76	2642.19	4.17215	7.62521	2.12529
proteinId287170	PCON_01741	SMAC_02908	-4.01233	0.00180277	1.14122	0.303968	-2.54161	0.000406169	0.00622529	0.999874	-0.0459947	0.998971	-7.93297	1.99929e-13	-1.03683	0.667657	2.71536	3.33942	0	2.46934	18.8222	21.1282	18.7616	9.12246	24.391	0.0171007
proteinId287280	PCON_05351	SMAC_07335	-0.279635	0.531972	1.9595	1.54409e-06	0.685889	0.0685925	-0.17204	0.999874	0.313366	0.998971	-1.22842	0.00149945	1.11795	0.125778	71.8392	151.684	33.5513	50.6954	34.2887	43.6987	49.8362	213.22	119.63	26.389
proteinId287935	PCON_09015	SMAC_03411	-0.627793	0.463121	-0.192595	0.90502	1.57892	0.0304484	0.474204	0.999874	0.276915	0.998971	-1.75874	0.0255893	0.680357	0.809329	83.2821	39.0013	30.2173	58.5251	33.2282	26.5867	29.9241	36.2688	27.7274	3.47368
proteinId288013	PCON_13807	SMAC_04335	0.317199	0.77055	0.750349	0.617043	5.2386	2.48342e-10	1.83503	0.369187	0.288014	0.998971	-2.33328	0.0133757	1.06496	0.743811	8.32173	7.88029	6.00579	306.764	33.4091	9.73424	11.0954	48.1936	27.3701	2.14655
proteinId288029	PCON_08679	SMAC_02952	-0.162368	0.813282	0.382734	0.702214	-0.512392	0.401401	0.510224	0.999874	0.418226	0.998971	-2.56458	3.1782e-05	-0.52924	0.8059	74.0431	52.1232	37.3256	29.7967	76.1214	59.7788	73.8196	9.86634	17.8653	1.60707
proteinId288062	PCON_07344	SMAC_08988	-2.8091	8.81006e-09	-1.65429	0.00284002	-4.98428	4.1685e-28	1.13564	0.204369	0.517413	0.998971	0.830875	0.106006	1.22115	0.270644	299.16	49.3616	22.989	2.9299	258.886	131.131	173.222	134.237	72.3044	67.7164
proteinId28886	PCON_05091	SMAC_07818	-3.14478	0.000949264	0.461507	0.78975	-2.28795	0.00988348	-0.503276	0.999874	-0.405641	0.998971	-2.19319	0.0283568	1.37411	0.644206	49.2224	37.0444	2.71818	2.64125	11.9949	19.6186	13.311	12.4916	5.76161	0.465158
proteinId288888	PCON_06447	SMAC_06724	0.385646	0.535834	-0.296695	0.767951	0.937976	0.079551	-0.12707	0.999874	-0.453672	0.998971	0.379245	0.528738	0.271193	0.905623	64.6395	28.4783	48.9801	30.8831	18.0966	22.3263	14.8664	131.27	145.965	88.7505
proteinId289089	PCON_10086	SMAC_06715	-0.81311	0.303239	0.289193	0.835518	0.126272	0.879903	-0.639845	0.999874	0.125865	0.998971	-4.14461	0.000127584	-0.00920413	0.996352	75.5886	49.9734	24.1912	28.354	20.5717	36.7081	36.8728	4.78156	6.13069	0.0608255
proteinId289100	PCON_04199	SMAC_08371	-8.43444	1.47062e-37	1.38986	0.063262	0.0388599	0.956001	-0.0896743	0.999874	1.70557	0.0559801	3.56199	2.868e-09	-0.911356	0.64219	997.012	1449.21	1.29717	66.0241	75.449	90.8541	279.41	17.9784	39.8815	258.392
proteinId289127	PCON_06367	SMAC_04824	-2.94065	2.39471e-10	-0.192131	0.819404	1.96653	5.31664e-07	1.01307	0.192868	0.99028	0.195838	0.916195	0.0407554	-0.110736	0.964332	58.8858	27.4579	4.17331	228.753	146.181	80.9282	148.878	20.5948	27.3087	25.4665
proteinId289222	PCON_13542	SMAC_04090	0.51413	0.386819	2.31446	5.76203e-05	-0.234733	0.696674	-0.487383	0.999874	-0.0566911	0.998971	-1.71958	0.00139028	0.398218	0.841038	119.151	328.211	97.2468	25.0117	25.8463	41.1862	36.3151	96.0455	96.5093	15.0515
proteinId289266	PCON_08261	SMAC_04976	-1.75816	0.00383975	0.326284	0.76301	2.03391	0.000191865	-0.458971	0.999874	-0.165052	0.998971	0.0483173	0.946407	-0.333259	0.890978	541.835	368.427	88.4216	233.404	49.6174	77.6406	63.2751	28.1335	45.0218	26.224
proteinId28939	PCON_12566	SMAC_03374	1.2257	0.116955	-0.367127	0.789981	-2.02877	0.0039828	-0.378488	0.999874	-0.385188	0.998971	0.0810951	0.926737	0.546204	0.841038	15.7966	6.52211	21.6818	3.67154	14.4829	21.4664	14.9285	39.6619	29.6003	16.3473
proteinId290022	PCON_10025	SMAC_04265	-4.74532	9.74501e-08	-0.848473	0.523768	-3.86125	1.77641e-06	0.137526	0.999874	0.0686582	0.998971	-3.89841	1.00739e-05	0.177791	0.972532	65.142	18.7254	1.11774	1.98405	45.317	46.2496	44.6245	23.2708	25.4804	0.644808
proteinId290315	PCON_02718	SMAC_04538	-1.62404	0.0636686	-0.546083	0.702104	-0.363404	0.692356	-0.912608	0.999874	-1.43399	0.538792	-1.57217	0.0616928	1.55949	0.504614	62.8679	22.6422	10.8285	77.5858	64.8054	142.036	45.9338	555.186	222.982	32.222
proteinId290370	PCON_10735	SMAC_04860	-2.9852	0.000699822	-0.317692	0.824945	1.5682	0.0197774	0.452558	0.999874	0.676726	0.998971	-2.98156	2.74403e-05	0.726486	0.770989	18.1062	7.68898	1.00118	91.7565	52.9647	43.1569	64.5292	71.2757	52.6306	2.86038
proteinId290615	PCON_04558	SMAC_06566	3.21168	0.05057	-0.578929	0.873423	-1.87967	0.213541	-0.796982	0.999874	-1.08683	0.998971	-3.68442	0.0306208	1.68746	0.719682	0.380608	0	4.53077	0.332487	1.18915	2.52625	0.971501	13.8785	5.06018	0
proteinId291231	PCON_07654	SMAC_06850	-3.0948	NA	-2.56696	NA	0.498559	NA	0.129281	NA	-0.889402	NA	1.17716	NA	0.946984	NA	21.8119	1.74615	1.21626	218.21	214.082	220.128	106.243	30.0196	19.5882	26.135
proteinId291443	PCON_13855	SMAC_03580	-0.453232	0.5963	-0.0412185	0.982759	1.19997	0.0802404	-0.404866	0.999874	-1.15056	0.676932	1.24493	0.0844258	1.41929	0.472872	9.0741	4.7204	3.70919	17.6194	7.03082	10.6186	4.26037	69.8497	33.7489	44.136
proteinId291532	PCON_07498	SMAC_04631	-4.0874	2.34706e-06	-1.99462	0.0508232	-3.55243	5.71006e-06	0.323702	0.999874	-0.269448	0.998971	2.21293	0.00942618	0.233139	0.959679	76.9436	9.44696	2.13997	3.25282	67.1959	59.7584	45.3185	12.3936	12.6304	29.0221
proteinId291534	PCON_09125	SMAC_01601	-3.31395	5.64386e-07	0.5931	0.570891	0.156689	0.840435	1.04707	0.705372	0.504885	0.998971	-1.26375	0.0670083	-0.34309	0.903225	2541.61	2103.83	135.379	2248.92	5354.44	2853.99	3764.35	1873.1	3379.26	698.542
proteinId291710	PCON_13733	SMAC_02543	-3.24131	2.17565e-05	-0.769596	0.484263	-2.88492	2.37495e-05	-0.342986	0.999874	-0.881824	0.998971	-1.74369	0.0195197	1.01077	0.667404	52.1643	16.061	2.72334	5.43101	41.178	59.4523	28.8626	138.533	81.5337	11.2284
proteinId292004	PCON_01730	SMAC_04027	-2.82561	2.13805e-06	0.0844295	0.939934	-1.02557	0.040154	-0.0576278	0.999874	0.42739	0.998971	0.240861	0.693933	-0.140421	0.962421	25.5681	14.6493	1.94608	4.78623	11.0615	12.9906	16.1327	5.65058	7.72615	5.01917
proteinId292085	PCON_11895	SMAC_06465	-1.35732	0.0246444	-0.275894	0.794917	0.967554	0.0749009	-0.948928	0.5968	-0.469112	0.998971	-1.41648	0.0128444	-0.0400219	0.992735	36.6178	16.1539	7.97181	73.5333	23.6708	52.364	34.3698	56.1545	73.491	12.6228
proteinId292230	PCON_13700	SMAC_06112	2.75007	1.22661e-05	1.27508	0.110206	0.941813	0.128239	0.174311	0.999874	-0.289671	0.998971	-0.391334	0.596009	-1.21295	0.523074	10.7326	14.4737	44.2083	26.4286	19.1422	19.0599	14.2524	2.35625	6.08024	2.36372
proteinId292446	PCON_10626	SMAC_06598	-0.579687	0.500592	1.79647	0.0468233	1.437	0.0464225	0.277152	0.999874	0.466073	0.998971	-0.230571	0.791725	-0.374151	0.906176	32.5332	63.6747	12.2139	76.3114	41.5238	38.419	49.2456	27.0243	46.0115	21.8801
proteinId292455	PCON_02827	SMAC_01744	-5.9481	1.41268e-08	1.98627	0.021904	1.68535	0.0156538	-0.511993	0.999874	-0.501868	0.998971	2.01372	0.00652334	0.0333494	0.994019	65.2289	145.615	0.19797	107.903	28.1207	45.8926	29.3651	19.0401	23.9845	57.7343
proteinId292586	PCON_11039	SMAC_01510	-4.58247	1.82184e-07	-1.93905	0.0570205	3.47279	4.79461e-06	-7.76619	4.64802e-17	-5.90642	1.72337e-11	-3.53878	1.59829e-05	-2.17714	0.214494	109.47	14.5858	2.04864	1116.19	0.347352	132.745	1.57747	91.2878	617.139	22.3664
proteinId293037	PCON_04392	SMAC_04625	0.923727	0.201132	1.76343	0.0250675	-2.60129	3.4091e-05	-0.521386	0.999874	-0.499492	0.998971	1.37512	0.0444336	0.127258	0.975216	289.756	551.368	319.649	14.0804	71.9897	117.892	75.9628	110.607	144.473	185.666
proteinId293196	PCON_02128	SMAC_06555	-2.04624	0.000515568	-0.244941	0.809925	0.262526	0.641653	0.160534	0.999874	-0.102183	0.998971	-0.226972	0.703341	-0.592374	0.754451	20.4051	9.20161	2.6906	28.866	33.6427	33.8478	29	7.34914	14.1044	6.52463
proteinId293225	PCON_11509	SMAC_03183	0.206173	NA	-0.506331	NA	3.4717	NA	-2.50596	NA	-1.947	NA	6.0424	NA	-1.94656	NA	7.96159	2.86707	5.32188	52.5988	0.642715	5.50313	1.07079	3.89453	24.389	1066.3
proteinId293282	PCON_10063	SMAC_01039	0.0696827	0.91301	-0.313203	0.731195	-5.02023	8.08344e-17	0.0275537	0.999874	0.184023	0.998971	-2.40966	2.16963e-06	0.743667	0.64219	33.3931	14.2901	19.7819	0.282263	17.1658	18.9918	19.7943	64.8596	47.6857	4.17367
proteinId293448	PCON_08331	SMAC_09479	0.700022	0.439637	1.93125	0.0445916	-2.79582	0.000259279	1.33163	0.5968	1.68094	0.277117	-2.54845	0.00285753	0.234533	0.958257	7.53537	16.4216	7.15952	1.43868	33.7032	14.4978	44.7799	6.76782	6.61136	0.630691
proteinId293662	PCON_03544	SMAC_02979	0.471287	0.20869	0.0373258	0.966794	0.00762115	0.983502	-0.171248	0.999874	-0.20016	0.998971	-2.0828	2.82466e-08	-0.0150553	0.994019	202.652	111.589	160.233	88.557	97.044	123.369	98.487	18.3628	21.8715	2.80694
proteinId293691	PCON_04747	SMAC_01728	-0.987643	0.263729	-0.221072	0.89359	1.44534	0.0617255	0.161537	0.999874	0.180291	0.998971	0.994808	0.241036	1.33659	0.578155	45.9986	20.9137	12.6105	29.2412	14.5636	14.6065	15.2283	126.094	58.9643	55.6659
proteinId293761	PCON_10317	SMAC_01869	-5.08548	1.00092e-10	-0.0646204	0.965945	-2.15443	9.65029e-05	-0.926833	0.690551	-0.148729	0.998971	-1.13773	0.0580691	0.162721	0.959679	16.7951	8.49895	0.216763	2.1247	5.90409	12.8664	10.5843	31.7207	35.3305	7.99282
proteinId293816	PCON_05016	SMAC_06527	-3.12932	1.6694e-07	0.589865	0.456092	0.590736	0.279304	0.643826	0.979684	0.218068	0.998971	-0.63825	0.324922	0.394833	0.84651	46.8094	38.2978	2.8517	53.249	69.8445	49.9615	53.6079	7.9661	7.5695	2.18228
proteinId294176	PCON_01722	SMAC_07873	-3.71772	4.96342e-05	1.32992	0.269502	-1.88696	0.0274105	1.81907	0.347165	0.278007	0.998971	2.28775	0.0107589	0.352755	0.93008	48.9034	71.5977	1.78475	9.94538	186.141	55.2926	62.349	63.7764	57.6924	148.713
proteinId294569	PCON_14215	SMAC_03640	-6.56704	5.44735e-09	-0.0623856	0.974969	0.712649	0.394627	0.0345555	0.999874	-0.251856	0.998971	-0.667727	0.444755	-0.470485	0.87638	36.0659	18.6341	0	91.0674	71.4363	78.639	60.1333	85.2031	153.921	54.1015
proteinId29471	PCON_09293	SMAC_05326	-2.34426	2.11798e-06	-0.698951	0.289708	1.64238	0.000193219	0.161892	0.999874	0.357357	0.998971	-0.143061	0.803839	0.158334	0.950145	46.3034	15.1537	5.00585	83.5786	36.9319	37.2002	43.8462	14.9063	16.0499	7.01007
proteinId294771	PCON_05904	SMAC_01426	-3.78506	2.13805e-06	0.218555	0.884122	-3.21109	2.47536e-05	-1.53464	0.344872	0.269288	0.998971	-1.47997	0.0450239	-0.244867	0.943687	33.8618	21.455	1.24586	0.667411	2.65939	9.12289	10.2407	18.8096	28.3282	5.39487
proteinId294775	PCON_02850	SMAC_01732	-2.54668	2.70752e-05	0.783871	0.336415	-2.18774	5.6395e-05	0.950098	0.651481	-0.084049	0.998971	2.52454	1.07714e-05	0.394229	0.848841	44.9275	41.9728	4.19469	4.43726	50.5179	29.0298	25.0809	46.0099	38.5438	127.179
proteinId294841	PCON_08649	SMAC_02313	0.855689	0.114123	0.351443	0.683798	3.56362	1.80182e-15	-0.0672458	0.999874	0.082764	0.998971	2.75326	3.08494e-08	0.117657	0.969182	32.6988	22.1702	33.7871	268.143	25.9287	30.6404	29.844	14.3868	15.5253	61.0976
proteinId295120	PCON_10397	SMAC_08388	-1.25892	0.0895941	0.0400306	0.982759	0.238465	0.759342	0.303011	0.999874	-0.0573568	0.998971	-6.32688	1.06049e-12	0.952827	0.667404	24.5767	13.5975	5.67164	46.4687	61.8181	56.126	49.4413	32.0244	19.3645	0.0658401
proteinId295367	PCON_02422	SMAC_02389	-0.249313	0.766083	2.38718	0.00314496	-0.0118366	0.987771	0.0841494	0.999874	0.147425	0.998971	-1.51532	0.0396986	-0.147099	0.972532	130.005	387.694	62.0807	28.7095	37.8052	40.1605	40.9231	99.3974	139.062	26.8864
proteinId295497	PCON_05985	SMAC_01932	-4.13718	9.82805e-14	1.65193	0.0109714	-1.31575	0.0156944	3.57335	9.77555e-10	4.92165	2.80518e-18	-0.631659	0.298014	-0.447895	0.828265	517.665	890.525	15.4946	9.80468	380.543	34.1717	1020.28	47.2438	79.2807	28.1412
proteinId295641	PCON_04384	SMAC_02828	-2.96246	0.00108358	-0.569395	0.689513	-0.319325	0.734491	-0.29197	0.999874	-0.79008	0.998971	1.97179	0.0191665	0.612396	0.841038	34.2573	12.1521	2.15808	19.0766	24.0283	33.4593	17.3115	18.258	14.2868	27.0779
proteinId296019	PCON_05977	SMAC_05460	-0.307971	0.770818	-3.45211	0.000679282	-3.43597	0.000417016	-3.36439	0.010296	1.53989	0.61451	0.461914	0.655713	0.733016	0.823323	181.824	7.72138	83.5097	0.530993	0.580633	9.6617	27.3159	388.957	322.95	231.533
proteinId296032	PCON_07842	SMAC_02162	-1.60121	0.0112701	0.138467	0.914647	1.70424	0.00169077	1.47167	0.120522	-0.628826	0.998971	1.93125	0.00283051	1.52636	0.318322	38.2168	22.4744	6.98528	39.5206	42.029	16.6959	9.78681	5.67337	2.86815	5.3771
proteinId296082	PCON_09010	SMAC_03406	2.3254	0.000112922	-1.40449	0.059307	-1.03004	0.0882683	1.21374	0.367071	1.34242	0.227327	4.6919	3.83451e-16	0.250443	0.923353	29.8565	5.93701	88.9337	3.98976	23.8696	11.3496	27.1061	90.8047	101.765	1490.38
proteinId296123	PCON_02548	SMAC_06927	0.320553	0.707302	1.09673	0.267197	2.85393	1.87108e-05	-0.106874	0.999874	-0.416362	0.998971	-4.48518	2.80361e-09	0.221571	0.955175	64.7683	76.0426	46.043	171.854	26.081	31.7738	21.6359	41.3624	43.5711	0.773177
proteinId296257	PCON_07422	SMAC_02208	-3.2182	1.78624e-06	0.0603834	0.969894	0.59126	0.383856	-0.0572607	0.999874	0.189953	0.998971	-4.31239	1.49546e-11	0.241249	0.937394	43.7982	24.5463	2.42781	76.0365	59.7043	70.1753	73.6172	155.649	159.407	3.43221
proteinId296460	PCON_05850	SMAC_03636	1.5003	0.23213	-1.2753	0.463568	3.13749	0.00378688	0.283578	0.999874	-0.386367	0.998971	3.31429	0.00403677	-1.31493	0.760097	13.8303	2.73276	24.907	44.4108	6.61798	5.98827	4.05627	2.84196	9.56695	51.8401
proteinId296575	PCON_05349	SMAC_01092	-4.65603	2.03281e-18	-0.637741	0.250458	1.27597	0.000614995	-0.117463	0.999874	0.121618	0.998971	-3.95303	1.03427e-19	-0.161398	0.93008	296.833	102	5.947	188.338	88.5502	108.626	108.345	60.439	89.4913	2.69766
proteinId296704	PCON_02695	SMAC_03464	-5.57239	4.62643e-10	-0.559983	0.604766	2.12623	0.000695884	0.356918	0.999874	0.638275	0.998971	-0.244156	0.830209	0.725996	0.813004	72.1604	26.0879	0.626411	34.5609	12.4514	10.8711	15.7505	0.772564	0.9672	0.207658
proteinId296826	PCON_03170	SMAC_03670	-2.38153	3.79875e-09	0.155867	0.81126	0.440205	0.167007	0.284426	0.999874	0.336315	0.998971	0.67924	0.0559221	-0.538399	0.638121	34.4792	20.6307	3.58646	35.8145	40.043	37.056	43.0329	6.96399	12.4769	10.1358
proteinId296827	PCON_01783	SMAC_00180	-1.73876	NA	0.278914	NA	-2.76124	NA	-6.49285	NA	-5.3731	NA	2.63871	NA	-1.08937	NA	35.0987	22.9943	5.66648	10.8046	0.876345	108.5	2.09356	7.93419	20.0815	66.0607
proteinId296939	PCON_06904	SMAC_00049	-2.18566	2.37586e-05	-0.364188	0.662379	1.08159	0.0215508	0.240124	0.999874	0.29305	0.998971	2.56493	1.37603e-07	-0.11189	0.970641	105.733	44.1316	12.8726	98.0026	67.4222	64.1588	72.6588	15.499	23.1199	72.2716
proteinId296968	PCON_08746	SMAC_03984	-2.18309	0.00364271	1.79112	0.0413977	-1.03973	0.153577	0.652959	0.999874	0.212624	0.998971	1.92369	0.00931501	-0.668862	0.8059	148.579	286.798	17.1981	40.2897	169.187	119.206	127.488	22.1662	44.795	103.058
proteinId296984	PCON_09851	SMAC_02933	0.341426	0.566512	-2.99015	3.03597e-07	-4.0951	5.977e-18	1.20876	0.18366	0.0940249	0.998971	1.24292	0.0173588	-0.91245	0.543361	36.8701	2.34165	26.6812	1.99258	101.845	48.9136	48.133	13.0781	29.398	35.041
proteinId297074	PCON_13257	SMAC_03953	0.698368	0.704598	0.473008	0.885051	1.86907	0.00118279	-0.0132919	0.999874	0.010207	0.998971	-1.09719	0.0940126	-0.192075	0.953269	0	0	0	68.9535	22.96	26.1074	24.1482	14.9982	20.8956	4.65093
proteinId297087	PCON_11129	SMAC_06348	-3.31805	1.82137e-10	-0.849299	0.147265	-2.30796	5.85704e-07	0.00986322	0.999874	0.472261	0.998971	0.517816	0.288675	-0.0968017	0.971541	70.1301	20.7944	3.8376	2.8099	17.9138	20.0537	25.7391	13.0236	17.0225	12.791
proteinId297125	PCON_06962	SMAC_07057	-0.544683	0.329108	-1.39389	0.0212779	0.00488395	0.99238	0.651299	0.889518	0.529409	0.998971	-2.04759	3.52725e-05	-0.287631	0.878565	25.0963	5.0123	9.72847	229.647	453.094	323.093	430.805	31.9997	49.8264	6.23918
proteinId297131	PCON_09879	SMAC_09145	-4.52711	1.27456e-06	0.466833	0.771714	-2.54588	0.00575511	-0.476767	0.999874	-0.0360297	0.998971	-0.273901	0.788983	0.909842	0.770757	80.0159	60.4063	1.53711	0.656404	3.91635	6.31098	5.64239	133.72	85.3741	31.327
proteinId297559	PCON_06219	SMAC_05925	-2.9704	4.80495e-09	-1.37546	0.00535548	-0.201195	0.642778	0.0610995	0.999874	-0.104748	0.998971	-3.57023	2.94322e-14	-0.608207	0.638121	27.8028	5.64792	1.89136	22.6447	33.9236	36.6842	31.25	7.45264	13.7604	0.599467
proteinId297607	PCON_13538	SMAC_09144	-1.04499	0.0669199	-0.803482	0.256086	-3.12465	3.51429e-12	-0.301658	0.999874	-0.167932	0.998971	-1.08638	0.0583817	-0.106505	0.971541	29.2862	8.89582	7.87891	3.71668	33.5717	46.8108	38.1412	3.65628	5.1929	1.0605
proteinId297680	PCON_04725	SMAC_01018	-4.1568	1.36072e-05	-0.614708	0.558739	2.34335	5.48511e-05	-1.04105	0.642726	-0.88608	0.86073	-0.0959303	0.900092	0.107039	0.977818	16.1851	5.54057	0.28631	248.376	28.564	67.7152	33.0605	20.4649	23.0157	10.2481
proteinId297691	PCON_02054	SMAC_09592	-4.41386	2.44295e-09	0.19331	0.886212	2.96414	3.9472e-07	-0.396592	0.999874	-0.623692	0.998971	0.307631	0.678468	1.22694	0.504797	152.441	93.6984	3.40613	466.285	53.9215	80.6452	47.5154	141.054	69.759	41.7636
proteinId297752	PCON_11649	SMAC_07039	0.214578	0.869228	0.264672	0.908917	-1.99734	0.0630987	-0.0777866	0.999874	-0.0151852	0.998971	-1.04184	0.381319	-0.531732	0.910651	150.042	98.6404	100.492	3.64772	18.6275	22.2682	20.249	9.01997	17.0582	3.28947
proteinId297758	PCON_08856	SMAC_07017	-3.49468	1.88907e-06	0.300247	0.819404	0.137394	0.863158	0.271195	0.999874	0.19594	0.998971	0.913285	0.211093	-0.750988	0.762972	138.893	92.2883	6.27417	102.814	141.989	131.908	139.46	21.619	53.7877	53.4272
proteinId297805	PCON_10780	SMAC_04764	-3.29006	8.74738e-11	-0.865301	0.112987	3.14807	1.47634e-16	-0.3341	0.999874	-0.144532	0.998971	2.12245	3.85485e-07	-0.412373	0.799532	70.1153	20.5187	3.87874	78.0095	8.42336	12.0271	9.96804	15.1293	26.4757	61.447
proteinId29809	PCON_04742	SMAC_01854	0.816423	0.144687	0.483018	0.55188	0.208684	0.719978	-1.31386	0.123442	-1.59192	0.0245555	-1.73555	0.00131061	0.139875	0.962421	7.59416	5.73781	7.68546	9.08267	3.84161	10.9443	3.24987	10.92	12.0354	1.93634
proteinId298243	PCON_14118	SMAC_06245	-1.55391	0.0373446	1.69973	0.0433634	0.36475	0.635718	-0.150065	0.999874	-0.0767744	0.998971	-2.81491	0.000481411	0.551339	0.832526	63.0744	113.916	11.6487	43.4844	38.315	48.1294	41.7432	7.58824	5.4008	0.360458
proteinId298245	PCON_08725	SMAC_05219	-0.838944	0.340967	-0.51218	0.712736	-0.704407	0.398504	0.655521	0.999874	0.0924062	0.998971	4.04054	1.76448e-07	-1.59793	0.494199	151.291	55.6391	46.0904	135.299	451.856	316.58	311.363	22.9741	92.1379	993.103
proteinId298390	PCON_13295	SMAC_08113	-1.34367	0.0179651	0.55338	0.486488	0.596229	0.269816	0.494975	0.999874	0.540404	0.998971	2.49409	1.46949e-06	1.00015	0.510432	87.9175	69.2731	19.173	77.5649	89.6007	71.2784	95.9193	98.2634	54.6458	169.261
proteinId298473	PCON_04581	SMAC_02466	-4.00246	5.39128e-12	0.167652	0.847086	0.161345	0.745499	0.121673	0.999874	0.332885	0.998971	-1.73758	0.000143346	-0.9506	0.425569	23.9989	14.4373	0.773539	7.68027	9.10635	9.42649	10.97	4.79186	11.0962	1.76899
proteinId298779	PCON_01399	SMAC_08164	-3.3385	3.52581e-05	1.6396	0.0871923	-0.00163061	0.998482	1.1208	0.806454	0.692563	0.998971	2.71954	0.000434287	2.2393	0.129211	252.978	446.516	12.6348	23.433	64.7167	32.4745	49.2044	56.5752	15.2696	59.1867
proteinId298793	PCON_13740	SMAC_02670	-3.15224	2.13755e-05	0.683051	0.47368	1.46476	0.0147204	-0.414406	0.999874	-0.49621	0.998971	0.383587	0.58937	0.0946902	0.981551	23.3631	20.3789	1.28422	48.0553	15.9936	24.2665	15.666	53.0124	57.4266	37.0323
proteinId298876	PCON_13253	SMAC_03490	0.848363	0.215828	0.653951	0.486488	3.26323	1.00589e-08	0.315324	0.999874	0.459055	0.998971	-1.59466	0.0115853	0.942181	0.638121	19.4394	16.5859	20.2864	58.984	9.12243	8.2185	10.4882	183.858	125.931	18.6912
proteinId298900	PCON_03719	SMAC_02081	-2.21625	0.000147242	-1.23692	0.0766241	0.210134	0.738017	-2.13359	0.00151497	-1.39332	0.121969	1.00065	0.0832445	0.928025	0.582333	19.238	4.27723	2.24433	39.715	9.4215	48.2352	16.4743	61.0046	39.5358	38.0749
proteinId298987	PCON_09724	SMAC_12097	-1.0107	0.0445366	-0.807552	0.197992	1.57517	0.000174354	-0.252619	0.999874	-0.28559	0.998971	-1.53292	0.00378819	0.28342	0.878844	39.6092	11.9754	10.9826	199.32	69.6067	93.6834	70.4288	10.0241	9.45531	1.57064
proteinId299302	PCON_13768	SMAC_00133	-1	0.222339	-0.735289	0.51676	-0.20863	0.805215	0.729534	0.999874	0.625575	0.998971	-0.815941	0.303169	1.40617	0.503812	51.1976	16.2146	14.1579	24.7829	60.6682	40.3791	58.4928	117.599	59.7955	17.3328
proteinId299331	PCON_06568	SMAC_07845	-2.35265	0.0035023	-1.23292	0.226483	1.19344	0.100254	-0.699951	0.999874	-0.669404	0.998971	3.52754	1.51027e-06	-0.208554	0.959679	35.1292	7.75042	3.53825	38.7231	12.4409	23.2302	13.1533	3.82432	5.76636	32.2496
proteinId299395	PCON_01629	SMAC_03744	1.13947	0.0232983	-0.10283	0.923539	-2.55749	4.20251e-08	-0.48745	0.999874	-0.209813	0.998971	0.385889	0.472249	0.543847	0.762972	15.7949	7.87741	20.0697	3.01594	15.2591	24.2332	19.2274	18.4619	16.9189	10.221
proteinId299472	PCON_13612	SMAC_05479	-0.508513	0.60838	-0.299044	0.862116	-0.367925	0.703122	-4.30732	5.80646e-06	-1.43034	0.631804	-2.14968	0.0140391	1.22732	0.658801	49.5155	21.2807	19.5062	22.9835	1.58816	42.5857	13.5451	58.1295	30.9663	2.89088
proteinId299549	PCON_03657	SMAC_01308	0.97019	0.0847067	0.100252	0.932496	3.02997	1.86707e-10	0.284719	0.999874	0.0900699	0.998971	-0.468791	0.421061	0.108183	0.972532	48.6452	28.0046	54.9102	399.75	72.1216	66.4981	65.1038	106.467	122.966	49.1674
proteinId299576	PCON_02350	SMAC_08124	-7.80469	2.00475e-11	-2.49369	0.00699034	-1.20961	0.136223	2.13992	0.0813638	2.09211	0.0870043	-0.288615	0.755515	0.476615	0.873601	48.8459	4.2392	0	1.59695	21.9175	5.23211	21.8888	87.9779	78.011	28.8244
proteinId299670	PCON_13381	SMAC_03312	-0.239287	0.729794	2.35693	0.000288111	-1.39172	0.0136582	0.781509	0.913528	0.545327	0.998971	-1.11676	0.0696309	0.226451	0.933796	2635.81	7547.09	1260.91	225.248	1299.68	841.368	1139.54	1027.86	1219.99	286.439
proteinId299863	PCON_07421	SMAC_03315	-1.73229	5.74614e-06	1.01584	0.0139751	1.20682	0.000153973	0.144168	0.999874	0.172625	0.998971	1.48292	2.1462e-05	0.150194	0.923113	41.0746	44.6803	6.83853	143.669	85.3104	87.0166	90.0554	26.9255	31.1113	42.1964
proteinId300011	PCON_10764	SMAC_08104	-1.21249	0.177209	0.198585	0.911787	0.211565	0.826172	0.307945	0.999874	0.891382	0.998971	-2.56346	0.00192778	-0.767245	0.799532	48.098	29.6724	11.2141	23.1784	30.8419	27.8339	48.592	29.3355	65.2256	5.81844
proteinId300189	PCON_07057	SMAC_01238	-1.70665	0.00641429	0.212057	0.858181	-1.61211	0.00352436	-0.218052	0.999874	0.472383	0.998971	2.83382	1.38158e-06	-0.0141559	0.995399	45.6993	28.6136	7.74945	20.3811	67.6547	89.2311	114.35	10.3753	15.5391	58.1189
proteinId300211	PCON_01464	SMAC_06207	-2.86379	0.00018177	0.172341	0.916884	0.11183	0.899138	0.0796975	0.999874	-0.151247	0.998971	-0.692351	0.402853	-0.303936	0.929717	314.292	190.359	22.1166	471.092	581.524	618.302	509.602	204.347	332.553	113.866
proteinId300229	PCON_06995	SMAC_07256	1.3677	0.058385	1.19202	0.186762	-0.668506	0.338881	-0.257056	0.999874	-0.53248	0.998971	-0.555229	0.444755	-0.295009	0.919443	5.55171	7.02528	8.35525	5.96465	10.25	13.8859	8.7098	15.8549	25.5125	9.34563
proteinId300241	PCON_01391	SMAC_08169	1.46099	0.0046829	-0.0929263	0.934904	0.230317	0.687434	-0.655015	0.936946	-0.171349	0.998971	2.91578	3.016e-09	1.55992	0.0821067	172.723	86.7052	274.376	33.6652	22.1532	39.7356	32.3246	122.657	54.5414	219.826
proteinId300264	PCON_01676	SMAC_00132	-2.30657	0.000457363	-0.441009	0.68017	0.326541	0.636836	0.798286	0.942875	0.486367	0.998971	-0.17942	0.805668	-0.0729951	0.986449	146.355	57.2253	15.8913	174.348	302.424	193.107	250.583	100.434	142.312	67.4024
proteinId300266	PCON_03504	SMAC_03955	-3.56089	3.56119e-11	-0.617827	0.424323	-2.36595	1.32085e-06	0.400957	0.999874	0.240004	0.998971	3.0741	3.55335e-09	0.36352	0.848841	76.3562	26.2715	3.44058	6.75664	58.7295	49.8658	54.1601	14.3817	14.6046	69.0881
proteinId300272	PCON_07312	SMAC_02984	-2.69208	0.00017981	-1.61298	0.0569299	-1.40311	0.0346514	-0.0390863	0.999874	-0.0518563	0.998971	-7.65493	4.49655e-24	0.136143	0.972532	29.8324	5.08416	2.44764	4.41095	14.3798	16.6706	14.7063	117.066	128.145	0.229458
proteinId300279	PCON_03818	SMAC_03610	-4.61535	2.04596e-11	-0.281396	0.828568	0.0749115	0.923231	-0.742963	0.999874	1.90451	0.0408387	-0.219313	0.775537	-0.549287	0.817449	301.852	132.44	6.09759	31.5304	21.7022	41.7047	149.613	138.63	274.508	126.791
proteinId300349	PCON_03451	SMAC_00113	0.00989822	0.991129	-3.48815	6.74658e-07	1.22104	0.0482516	1.3062	0.353334	0.410303	0.998971	4.89313	2.71113e-15	0.551449	0.812864	37.8813	1.63854	21.4059	75.7566	101.727	45.2837	55.632	53.0789	45.3214	813.531
proteinId300376	PCON_05383	SMAC_02646	-0.831037	0.00991326	0.571945	0.152994	0.644078	0.0292432	-0.176137	0.999874	-0.307817	0.998971	0.483013	0.137099	0.212654	0.84651	229.203	183.557	73.1023	226.159	159.078	202.718	150.212	384.026	410.743	296.999
proteinId300416	PCON_08980	SMAC_03941	-1.25955	0.0971102	1.71061	0.0404553	-1.35078	0.0478213	-1.36802	0.393482	-0.600658	0.998971	-0.102996	0.900296	1.15717	0.578155	8.15191	14.8353	1.84188	2.57393	3.0535	9.22236	5.46384	188.069	98.8417	43.3159
proteinId300477	PCON_14144	SMAC_01824	-0.67616	0.170037	0.167238	0.854021	-0.188182	0.708337	0.216153	0.999874	-0.154283	0.998971	0.0449004	0.933456	0.435227	0.788832	50.6977	30.6504	17.9408	73.6442	122.245	118.302	97.5493	123.013	111.516	57.8141
proteinId300478	PCON_13756	SMAC_03796	-0.404181	0.589206	-7.28068	1.21584e-19	-1.1386	0.0711433	1.34787	0.329436	0.0805513	0.998971	0.710522	0.308609	-0.541289	0.816163	602.762	1.29432	257.984	248.368	1824.94	788.548	766.238	161.553	320.443	247.212
proteinId300493	PCON_10616	SMAC_08947	-0.234823	0.746845	2.34971	0.000611747	1.32006	0.0266827	-0.546322	0.999874	-0.86454	0.870402	3.72819	1.36188e-09	0.232108	0.940038	154.931	446.959	74.9917	82.0198	27.3829	45.5499	22.5817	7.22582	7.98825	63.8837
proteinId300558	PCON_05114	SMAC_07069	-3.81403	2.32205e-09	-0.363542	0.718516	-0.654582	0.258648	-0.433241	0.999874	-0.497411	0.998971	-2.10898	0.000260089	0.101382	0.976029	8.10562	3.3467	0.282815	21.3396	31.6163	48.4092	31.1719	6.93082	7.95904	0.88392
proteinId300571	PCON_10197	SMAC_00692	-2.17873	5.08009e-08	0.10704	0.893101	1.08768	0.00240407	0.00124077	0.999874	0.00258848	0.998971	-0.436042	0.301684	-0.39554	0.775597	90.4408	52.4445	11.165	93.3254	54.3729	61.2788	56.4522	28.4528	49.1124	18.764
proteinId300724	PCON_13616	SMAC_00862	-3.72411	1.98686e-12	-0.000802287	0.999445	-0.684216	0.181273	-0.5777	0.999874	-0.00740898	0.998971	-0.325921	0.570813	0.614726	0.729004	58.1145	31.3334	2.3768	42.0173	55.9394	94.9337	86.5441	99.0759	85.0323	32.2357
proteinId300739	PCON_08656	SMAC_08052	-1.13411	0.0424463	-0.25208	0.80152	3.66797	7.5413e-15	0.135566	0.999874	0.0708505	0.998971	0.165724	0.789385	-0.549308	0.770989	56.443	25.284	14.3323	545.369	56.7946	58.1545	56.1496	35.8382	64.6238	34.6934
proteinId300757	PCON_08206	SMAC_00050	-1.35265	0.0162411	-0.731793	0.328432	-0.755738	0.158171	0.00208019	0.999874	-0.176785	0.998971	-4.85534	1.13489e-13	0.265505	0.909866	23.2066	7.43489	5.02705	11.0066	23.1999	26.0914	21.1305	14.7839	13.4682	0.212185
proteinId300759	PCON_07474	SMAC_03299	-0.0048346	0.993741	0.369375	0.648567	2.11695	1.72906e-06	0.136027	0.999874	-0.0803851	0.998971	-0.330446	0.554322	-0.21173	0.923113	29.6928	20.7991	16.9665	89.9426	27.8389	28.5445	24.7398	12.3635	15.8775	7.32678
proteinId300811	PCON_11655	SMAC_08566	0.328464	0.700565	-0.409551	0.757928	1.99007	0.00359428	-2.03229	0.0700424	2.19425	0.0270527	-0.200817	0.813631	2.21866	0.0893466	42.7472	17.1283	30.6811	38.5225	2.59157	12.8141	56.798	287.011	79.2945	35.8738
proteinId300813	PCON_10906	SMAC_07924	0.46292	0.636255	-1.54181	0.162616	0.898816	0.302917	-0.0836193	0.999874	-0.325299	0.998971	-2.85	0.00070687	1.13954	0.66842	21.5855	3.70379	16.9999	21.9439	13.3899	16.0478	11.5948	132.764	72.3418	4.06758
proteinId300837	PCON_05103	SMAC_02868	-3.86443	1.48205e-10	-0.169107	0.888084	-3.87305	9.29075e-13	0.377496	0.999874	0.131087	0.998971	-1.06605	0.079452	-0.0342764	0.994019	41.9568	20.2477	1.52909	2.29674	57.5986	49.7796	49.9979	53.4488	68.9198	15.4329
proteinId300859	PCON_08190	SMAC_01262	-0.269763	0.715848	1.6801	0.023826	0.442874	0.51321	-0.51074	0.999874	-0.475308	0.998971	-0.933552	0.159133	0.190404	0.955175	69.6905	124.115	32.8363	61.6424	38.8084	62.956	41.248	110.136	119.676	28.5381
proteinId300867	PCON_12702	SMAC_05729	-0.111353	0.87554	-0.079337	0.955587	1.9082	0.000388661	0.0190322	0.999874	0.07915	0.998971	2.93748	3.71801e-07	-0.710757	0.732755	75.4649	38.3143	39.285	173.318	57.0407	63.463	61.6073	4.08321	9.22094	40.1996
proteinId300873	PCON_04870	SMAC_04019	1.30171	0.184323	0.067249	0.976429	1.50501	0.0898338	0.704819	0.999874	0.425738	0.998971	-3.23799	0.000387655	-0.100339	0.986867	33.0528	18.6112	48.3865	74.0315	52.1058	34.9562	43.8954	28.5373	38.0332	1.54827
proteinId30089	PCON_07497	SMAC_05336	-4.17035	2.29055e-08	-1.0706	0.291008	-1.63916	0.0201489	0.439339	0.999874	0.00959465	0.998971	-7.97251	5.02026e-23	0.0297264	0.994019	41.1642	10.2799	1.15915	20.1673	111.223	91.323	84.4069	56.3557	63.3754	0.0875793
proteinId300903	PCON_08011	SMAC_01012	-0.604341	0.142361	0.54635	0.286377	-0.854602	0.0163998	-0.148799	0.999874	-0.19266	0.998971	-0.647066	0.0983924	-0.157468	0.923113	19.1388	15.012	7.12829	8.79587	17.6286	22.059	17.6344	15.9776	21.5915	7.20797
proteinId300908	PCON_06452	SMAC_05510	-0.00147479	0.997366	0.0509952	0.956482	0.643246	0.0749967	0.47163	0.942875	0.390157	0.998971	-1.31253	0.00089756	-0.250657	0.853434	26.4725	14.7237	14.8697	38.9463	42.924	34.8159	42.0407	13.7399	20.5578	4.33149
proteinId300938	PCON_10088	SMAC_04064	-2.5028	7.08089e-05	-1.06013	0.189562	0.502889	0.434311	-0.455471	0.999874	-0.549213	0.998971	-3.007	9.42381e-05	0.34826	0.897112	31.3636	7.86149	2.97878	35.4962	22.4992	35.0602	21.7459	3.91175	3.70802	0.178168
proteinId300942	PCON_07748	SMAC_08438	-1.79343	0.00982268	0.557113	0.605804	-0.108946	0.889659	0.986509	0.792943	0.980721	0.809042	0.467711	0.533652	0.00993488	0.995626	214.024	173.208	34.0393	45.1894	122.887	68.4006	126.699	37.3471	47.7919	36.9242
proteinId300947	PCON_09501	SMAC_07596	-4.8542	3.03853e-07	-1.20912	0.133306	1.13888	0.0445657	-1.21629	0.343576	-1.37328	0.182958	-4.80514	2.78248e-07	1.37416	0.382738	21.2336	4.76526	0.235784	89.5253	21.2313	56.7192	19.6552	12.1136	6.37268	0.0596139
proteinId300967	PCON_08077	SMAC_05242	-6.76083	1.90442e-15	0.63846	0.552585	0.231334	0.906275	0.444223	0.999874	0.177327	0.998971	3.31833	1.07655e-06	0.65074	0.799532	145.353	123.716	0.630189	0	0	0	0	30.8668	25.8847	140.14
proteinId300969	PCON_04978	SMAC_08906	-0.388418	0.375759	0.957536	0.0437453	1.2374	0.000711822	0.502385	0.942875	0.243908	0.998971	-0.0442617	0.925901	0.308958	0.830072	153.607	161.414	66.1909	132.453	99.1072	78.6135	85.5318	82.3884	81.5903	42.8069
proteinId301004	PCON_03105	SMAC_03511	-2.54469	0.00399474	0.872788	0.50049	-0.317153	0.746626	0.0863948	0.999874	0.484871	0.998971	-0.544283	0.57448	0.311709	0.940038	449.276	456.981	39.5332	50.3139	82.7596	87.7363	114.647	460.046	466.467	181.075
proteinId301034	PCON_13722	SMAC_01085	-1.0815	0.228872	-0.139866	0.938688	0.977321	0.245287	0.987244	0.988356	0.827697	0.998971	-1.17854	0.176412	0.878849	0.762972	103.44	49.5991	26.4474	118.956	152.476	83.8486	140.536	133.162	89.2606	21.9618
proteinId301045	PCON_04212	SMAC_02573	-2.75678	1.83234e-06	-1.18437	0.0797878	0.24698	0.677845	-0.427512	0.999874	-0.692119	0.932074	-1.1739	0.0491193	-1.33216	0.342704	20.4372	4.7454	1.61731	55.8863	43.8717	66.8656	37.7269	1.81676	5.9313	1.24948
proteinId301053	PCON_12634	SMAC_02847	0.917639	0.233495	-1.14643	0.230304	0.286412	0.717987	0.175539	0.999874	-0.391024	0.998971	-3.62693	2.83136e-07	0.297613	0.923113	14.9133	3.49193	16.2027	35.1736	41.0551	40.7647	28.2766	19.6913	19.8829	0.673545
proteinId301067	PCON_02445	SMAC_07099	-2.94687	NA	0.0816935	NA	0.400409	NA	0.418781	NA	-0.490233	NA	-5.64973	NA	1.44236	NA	50.4976	28.6725	3.31906	45.4656	58.1196	48.2402	31.0169	69.6038	28.2378	0.19232
proteinId301111	PCON_03243	SMAC_06632	-0.915533	0.268903	-0.995041	0.347428	2.70988	6.36927e-05	0.482593	0.999874	0.279698	0.998971	-2.98415	4.31432e-05	1.34541	0.523074	10.7381	2.78789	3.13714	201.692	51.7212	41.1796	46.281	404.995	191.044	10.1578
proteinId301122	PCON_12471	SMAC_02914	1.1455	0.119097	1.29138	0.145276	-0.489067	0.510447	-0.395208	0.999874	-0.195574	0.998971	1.17821	0.101135	0.541875	0.830072	65.4276	88.5239	84.2686	22.4006	29.4183	44.1135	35.1453	138.578	118.474	155.583
proteinId301130	PCON_06566	SMAC_07252	1.67809	4.43143e-07	0.00809897	0.994465	0.591016	0.0714323	-0.900131	0.0877343	-0.916971	0.0671717	3.19785	1.78645e-22	-0.111112	0.950145	161.428	86.7759	294.743	105.046	45.875	97.1882	46.9294	23.8572	33.585	151.381
proteinId301134	PCON_02251	SMAC_00700	-1.16158	0.158235	0.0368311	0.984406	0.61476	0.439216	-0.407828	0.999874	-0.270212	0.998971	-1.75004	0.0228464	-0.305947	0.928587	25.7955	14.1736	6.26273	165.134	101.537	153.625	116.071	46.5804	70.6147	11.6416
proteinId301136	PCON_13100	SMAC_07366	-0.832759	0.260215	0.0799949	0.963134	-3.35846	8.001e-08	0.368483	0.999874	0.330079	0.998971	-7.44853	1.9282e-23	-0.758777	0.762972	82.688	46.919	25.7955	3.13934	53.9484	46.7302	54.2775	48.308	91.9066	0.23255
proteinId30116	PCON_04149	SMAC_04225	-0.349509	0.644436	-1.45173	0.0715542	0.603487	0.374275	0.597713	0.999874	-0.196003	0.998971	-0.733038	0.295062	0.979499	0.638121	16.1879	3.04396	7.07018	146.801	183.764	135.23	107.891	89.9549	55.8552	15.25
proteinId301194	PCON_04196	SMAC_02005	0.622563	0.330453	1.88759	0.00398511	-0.743693	0.206251	-0.208344	0.999874	-0.217323	0.998971	-4.07664	3.87526e-12	-0.0465553	0.99246	207.826	426.728	183.791	21.9087	39.5398	51.6431	40.7521	104.773	153.648	4.27024
proteinId301216	PCON_13620	SMAC_09092	-1.26499	0.128412	-0.815182	0.478621	1.86985	0.00984624	0.227117	0.999874	0.170604	0.998971	-0.443868	0.607893	0.851111	0.762972	16.2678	4.79584	3.58385	112.12	44.1502	42.2211	43.8286	61.3224	38.4925	13.688
proteinId301219	PCON_09887	SMAC_06647	-1.67201	0.0172888	-0.476348	0.672003	0.358908	0.622722	0.0536918	0.999874	-0.17344	0.998971	-4.7064	1.12616e-11	0.344321	0.902506	31.7346	12.1368	5.37392	79.7321	81.0472	87.9362	71.2655	21.2883	20.6231	0.318216
proteinId301247	PCON_05783	SMAC_01757	1.75436	0.0211576	-0.0815516	0.965624	0.0430651	0.959144	-0.235623	0.999874	-0.126318	0.998971	-2.49028	0.000754068	0.375503	0.904268	444.292	226.539	894.214	65.6102	66.057	88.4346	73.9199	174.374	182.136	16.3341
proteinId301292	PCON_04882	SMAC_01844	-1.85017	3.03603e-07	-0.0129273	0.989739	1.7401	4.54952e-08	0.373554	0.999874	0.103602	0.998971	1.18873	0.000745695	-0.760753	0.42573	58.9774	31.286	9.15424	231.006	111.515	96.8524	95.5517	29.6998	59.0658	73.621
proteinId301324	PCON_13887	SMAC_03416	-2.98898	0.00208376	-0.355927	0.846995	0.549581	0.586625	-0.616945	0.999874	-0.392579	0.998971	-7.31661	2.52036e-13	1.45016	0.626059	19.6447	8.12902	1.16807	14.5377	7.78786	13.8413	9.4885	86.1501	37.5639	0.0605298
proteinId301364	PCON_13669	SMAC_05857	-1.49232	5.64022e-05	0.287396	0.62226	-2.47046	7.46661e-15	-0.752952	0.30638	-1.32842	0.00191285	0.962517	0.00808098	-0.195538	0.897232	22.2325	14.5978	4.44096	17.2083	70.5763	134.546	48.8074	11.6451	15.6428	16.2622
proteinId301370	PCON_04106	SMAC_04022	0.568506	0.441276	0.0432996	0.978341	3.2707	4.11278e-08	0.0494404	0.999874	-0.230356	0.998971	1.68659	0.011433	0.626824	0.795517	901.491	497.947	767.1	4434.02	563.103	611.808	477.69	431.038	367.221	668.073
proteinId301411	PCON_06118	SMAC_02075	0.993006	NA	1.90868	NA	0.547117	NA	0.196686	NA	0.109608	NA	-1.8709	NA	-0.0649922	NA	155.218	326.978	179.772	73.9376	70.9626	69.4885	69.0329	146.971	188.366	28.6776
proteinId301431	PCON_07046	SMAC_01602	0.974471	0.265206	-2.46295	0.00749579	-0.664891	0.438116	-5.10474	6.37072e-08	3.82799	1.67038e-05	1.48126	0.0739361	-0.809633	0.775653	231.285	20.6474	263.371	6.17125	0.240333	13.6541	198.976	86.2693	187.599	299.172
proteinId301458	PCON_01228	SMAC_05315	-1.87068	0.0027034	0.393794	0.699375	-1.14639	0.0427622	-0.308313	0.999874	-0.825875	0.845041	-0.551757	0.389915	0.599847	0.771924	11.7242	8.25359	1.74056	10.8775	24.504	34.3379	17.551	26.7398	19.8961	6.73269
proteinId301565	PCON_11200	SMAC_03446	-3.87227	1.89648e-07	-0.143698	0.927438	-4.18232	4.99804e-10	-0.985664	0.875329	-0.598575	0.998971	1.19635	0.115668	1.17185	0.604812	70.7435	33.9391	2.36862	1.70267	21.1122	48.278	28.8715	19.4691	8.87623	11.3431
proteinId301638	PCON_07510	SMAC_07180	-0.758431	0.195594	1.31359	0.0433442	0.252586	0.891259	0.465192	0.999874	0.185036	0.998971	-4.48541	6.64774e-17	0.192772	0.940935	447.26	610.104	149.575	0	0	0	0	245.309	264.445	5.95786
proteinId301679	PCON_10404	SMAC_01900	-2.17805	7.55741e-07	0.896128	0.0783193	-3.03458	5.07803e-14	-0.493084	0.991071	-0.0966266	0.998971	0.604212	0.171918	-0.283248	0.849773	34.6985	34.7314	4.18784	1.97458	14.9589	23.8263	20.4104	9.96183	14.156	11.6267
proteinId301690	PCON_13314	SMAC_06672	0.449923	NA	2.97549	NA	-2.04495	NA	0.361285	NA	0.268072	NA	-0.333382	NA	-0.14739	NA	1526.65	7007.62	1192.83	110.499	767.929	666.585	742.515	2585.79	3776.44	1664.99
proteinId301696	PCON_05777	SMAC_00763	0.93187	0.179908	-0.525226	0.614112	-5.15882	9.60917e-16	1.23342	0.417626	0.771328	0.998971	-1.22269	0.0698113	0.25062	0.930969	69.037	25.3625	76.181	0.721175	102.952	48.2518	76.6501	25.3088	27.027	6.3176
proteinId301716	PCON_08598	SMAC_03979	0.372024	NA	0.0218516	NA	-1.02245	NA	-2.61202	NA	-2.77829	NA	0.0520616	NA	0.697599	NA	91.0859	49.5094	67.3205	41.6702	16.9557	122.492	15.5883	25.8127	19.1814	9.36937
proteinId301764	PCON_10041	SMAC_02802	-3.06817	0.000262529	-0.385947	0.75522	0.392018	0.574944	-0.805601	0.957671	-0.982364	0.765741	-3.17409	9.21879e-06	-0.778107	0.734737	7.61983	3.08797	0.441533	17.3121	9.2441	18.4972	8.41486	2.93019	5.92796	0.286049
proteinId301774	PCON_11969	SMAC_06072	0.519742	0.44503	2.33056	0.00048923	-0.629736	0.316202	0.36627	0.999874	0.178786	0.998971	1.26011	0.0436444	-0.0958288	0.97968	2209.93	6208.97	1817.59	259.714	650.933	565.834	589.442	1928.08	2775.57	3662.11
proteinId301806	PCON_04909	SMAC_02247	0.835972	0.303031	-0.019286	0.993956	2.86596	2.27583e-05	-0.35094	0.999874	-0.106787	0.998971	-4.09495	2.3343e-08	1.17601	0.611583	49.5862	26.2369	51.6883	98.1555	12.2658	17.8518	15.1493	143.032	74.2487	1.80708
proteinId301825	PCON_02800	SMAC_09022	-3.98511	9.58974e-16	-1.55102	0.00624119	-0.87971	0.0681023	0.408109	0.999874	0.335944	0.998971	2.75085	1.13948e-08	0.683216	0.667404	489.634	88.3639	16.8098	60.8317	187.154	158.199	184.342	180.837	147.46	535.058
proteinId301851	PCON_02544	SMAC_01716	2.15783	0.000422004	-0.268327	0.818605	-2.49975	1.13375e-05	-0.214942	0.999874	-0.357907	0.998971	-4.62475	1.17297e-07	0.156889	0.964332	29.0913	12.8098	75.8144	3.93704	25.0862	32.9176	23.427	6.12311	6.58904	0.101769
proteinId301904	PCON_02578	SMAC_08343	-3.19043	6.98382e-09	-1.45196	0.0180422	-1.01813	0.0410124	-0.13226	0.999874	-0.164858	0.998971	-1.91027	0.000193371	0.115854	0.969182	52.6598	10.1233	3.08854	11.0502	25.8493	31.9921	26.1095	51.725	66.6012	8.36002
proteinId301958	PCON_08967	SMAC_02831	0.142169	0.84154	0.0997706	0.93898	2.07516	0.00010262	0.247397	0.999874	0.436482	0.998971	0.811717	0.186791	0.419463	0.842167	56.5548	32.6667	35.3923	157.332	53.8056	50.929	63.6808	55.9843	50.2504	42.444
proteinId301975	PCON_06873	SMAC_02166	-1.31434	0.113593	-0.547038	0.676705	0.599948	0.469486	-0.0805881	0.999874	-0.255238	0.998971	0.0918858	0.921974	0.686364	0.810127	160.663	58.2004	35.2034	65.7701	49.975	59.7774	45.491	187.876	143.083	69.2096
proteinId301981	PCON_06580	SMAC_03233	-2.08619	0.00261394	-1.17072	0.187461	-0.101122	0.897866	0.246467	0.999874	-0.230466	0.998971	3.14048	2.2057e-06	0.185242	0.959679	117.941	27.2357	14.9894	54.8267	87.2406	82.4481	64.1765	66.4231	75.1116	400.618
proteinId302034	PCON_13739	SMAC_02669	0.514577	0.23487	0.166468	0.831956	0.802989	0.0328758	0.521489	0.899192	0.371094	0.998971	-0.678219	0.128139	-1.34351	0.0701264	32.5061	19.5507	26.2717	33.8316	34.4662	27.0036	32.1631	5.02275	15.3675	4.70939
proteinId302063	PCON_12042	SMAC_01203	-5.19099	3.03846e-13	0.0244946	0.990749	-0.873343	0.22545	0.525463	0.999874	0.848142	0.998971	-0.0129882	0.987279	0.599002	0.813611	255.247	138.817	3.36916	30.9486	104.207	80.5889	136.037	171.801	141.789	79.5485
proteinId302096	PCON_04922	SMAC_01270	0.945375	0.270583	-0.139563	0.936818	-3.09187	3.39121e-05	0.206411	0.999874	0.107184	0.998971	-1.7249	0.0328066	-0.556235	0.84463	102.02	49.7998	115.065	1.83393	24.3999	23.6759	23.4558	62.0584	122.117	15.5493
proteinId302109	PCON_03126	SMAC_08741	-1.31724	0.0090588	-0.134571	0.893037	0.135628	0.804645	-0.227836	0.999874	-0.0922668	0.998971	1.30261	0.00717795	0.117279	0.966543	38.3139	18.7052	8.5457	70.177	67.446	89.2659	76.7673	51.7092	54.0245	73.9911
proteinId302126	PCON_09986	SMAC_02072	0.911769	0.375746	1.00338	0.463015	-3.92676	1.24859e-05	-0.182542	0.999874	-0.187561	0.998971	-2.00855	0.0342192	0.659951	0.843651	54.1804	61.3684	61.4113	0.84175	17.0292	22.0037	17.6	324.337	259.684	33.9379
proteinId302131	PCON_13124	SMAC_09048	-1.20611	0.219564	-0.309779	0.865784	0.154193	0.883985	-0.110362	0.999874	-0.0887482	0.998971	-4.52635	3.31687e-07	0.945503	0.766448	22.722	9.70092	5.28015	37.1334	38.3248	46.8117	40.1986	125.071	76.7385	1.21528
proteinId302151	PCON_09147	SMAC_02354	-0.39714	0.508477	0.299072	0.75522	-0.151788	0.800963	-0.640447	0.974838	-0.474957	0.998971	-2.13944	4.67998e-05	0.43533	0.820034	54.2565	35.6862	23.0217	32.4212	28.314	50.2056	32.8695	68.382	61.6961	6.49078
proteinId302171	PCON_11337	SMAC_04842	0.417578	0.503887	-0.248946	0.813595	0.566634	0.317277	-0.0242157	0.999874	-0.185007	0.998971	-5.84371	2.03983e-22	0.0253036	0.994019	44.8607	20.1154	34.0623	79.0242	65.6114	75.194	60.6705	44.707	51.6008	0.395926
proteinId302255	PCON_13904	SMAC_07906	1.9898	NA	-2.19068	NA	-4.06492	NA	-3.40477	NA	-5.05181	NA	0.459787	NA	0.0194832	NA	30.9199	3.15034	76.4522	3.46506	7.05372	101.807	2.09864	8.44851	10.4208	6.63524
proteinId302256	PCON_05095	SMAC_05561	-4.37424	4.21776e-08	0.0405369	0.982759	-0.480711	0.525287	0.102699	0.999874	-0.296327	0.998971	2.74341	8.00227e-05	0.434136	0.868588	10.5508	5.85708	0.229283	15.2111	28.6204	29.9888	22.2214	11.3719	10.3612	34.0476
proteinId302280	PCON_02625	SMAC_03875	-0.490908	0.445908	-0.0408615	0.976433	-1.75863	0.00126037	-0.218489	0.999874	-0.35818	0.998971	-5.45735	1.66222e-06	0.673495	0.762972	48.2406	25.1211	19.1831	4.67698	16.9278	22.2893	15.8067	7.35881	6.72435	0
proteinId302307	PCON_13373	SMAC_08845	-6.00242	2.54944e-10	0.478943	0.787963	-0.395551	0.711857	0.00671133	0.999874	0.25109	0.998971	-3.82268	5.23e-05	-0.0981547	0.989734	340.652	258.912	2.11323	110.046	184.519	206.794	228.504	111.575	150.509	5.19134
proteinId302310	PCON_09622	SMAC_07037	-0.0214974	0.976653	-0.0975691	0.936344	-1.7935	0.000353304	-0.19624	0.999874	-0.0874613	0.998971	0.123882	0.847888	0.506219	0.799532	80.4931	40.1604	44.8632	20.4462	78.1753	101.313	87.346	60.0934	53.1921	27.1882
proteinId302324	PCON_11182	SMAC_06316	-5.59479	9.3755e-08	-0.686909	0.531095	-2.42615	0.000280303	-0.135435	0.999874	-0.521216	0.998971	3.47875	3.40394e-07	-0.0208934	0.995399	89.2253	29.3316	0.368154	6.44501	39.8336	49.4321	31.3182	41.1111	56.1393	366.865
proteinId302326	PCON_12633	SMAC_02848	-1.61903	0.0847067	0.882942	0.510952	-1.41095	0.10816	0.456314	0.999874	0.0237375	0.998971	0.552214	0.579327	-0.498873	0.890978	231.451	235.479	39.4644	34.7429	164.877	133.028	124.042	312.624	552.428	496.829
proteinId302331	PCON_11958	SMAC_02859	0.485385	0.152844	-2.90727	1.4974e-15	0.585808	0.0464225	0.350042	0.999874	0.324819	0.998971	1.66721	4.98799e-08	0.128957	0.927488	27.938	1.94132	22.1419	113.664	120.484	106.364	122.679	18.1715	20.975	33.2939
proteinId302340	PCON_07334	SMAC_03477	-2.8807	3.03151e-06	-0.778969	0.36689	-0.28117	0.679188	-0.292013	0.999874	-0.323564	0.998971	-0.321685	0.644815	0.122913	0.972532	118.533	36.3275	8.57714	62.2777	77.3731	107.413	78.3218	32.8065	35.2787	13.7679
proteinId302431	PCON_09801	SMAC_01508	0.639732	0.102978	2.07654	3.81085e-08	1.36321	4.08961e-05	-0.0787798	0.999874	0.67336	0.46429	3.35799	3.42076e-21	0.0553792	0.982233	56.1272	129.112	50.2952	108.235	49.0728	58.52	85.8337	24.0291	28.6397	160.48
proteinId302461	PCON_12049	SMAC_08572	-1.01895	0.201003	0.0659662	0.971083	-2.18321	0.00157531	1.13351	0.731808	2.06273	0.0515247	0.647937	0.424096	0.812093	0.762972	586.963	325.582	158.736	12.1863	161.588	80.4729	325.888	90.7372	64.684	58.4957
proteinId302481	PCON_03529	SMAC_01690	-0.27631	0.775142	-1.46989	0.174973	2.6056	0.000642638	-0.874629	0.999874	-1.24585	0.778645	0.186873	0.849371	0.754949	0.8059	28.785	5.28115	13.3889	94.1725	9.71033	20.701	7.65987	17.4245	12.6527	6.53451
proteinId302500	PCON_05415	SMAC_00816	-1.02744	NA	0.726128	NA	-1.69715	NA	-0.174232	NA	-0.037235	NA	-0.721768	NA	0.276376	NA	312.399	279.91	85.1415	61.0858	222.545	284.466	253.487	178.331	179.069	60.5088
proteinId302501	PCON_13385	SMAC_02305	-2.14426	8.74768e-05	-0.72448	0.340071	2.33004	2.38393e-06	-0.634308	0.999874	-0.448048	0.998971	4.85596	1.56632e-20	0.0993583	0.975353	1070.54	343.645	132.967	5439.75	839.452	1482.94	990.566	394.668	524.802	8037.66
proteinId302520	PCON_08139	SMAC_02926	-1.5961	0.0546632	-1.14169	0.289708	-0.755407	0.355205	-0.179467	0.999874	-0.349024	0.998971	-1.5347	0.0580691	-0.0588532	0.99255	42.8168	10.0547	7.6084	30.8665	58.4147	74.9324	53.4832	24.391	31.3539	6.02103
proteinId302543	PCON_10698	SMAC_06601	0.397574	0.46229	0.101298	0.923425	-0.967212	0.0363633	0.546204	0.999874	0.0114442	0.998971	-1.39163	0.00410203	0.702551	0.649712	149.52	85.8592	111.078	38.0918	137.014	105.062	97.3309	198.776	140.32	28.561
proteinId302562	PCON_14076	SMAC_08867	-1.90395	0.0442507	-0.326961	0.856838	-0.21892	0.835413	0.0362143	0.999874	-0.121342	0.998971	-0.890967	0.362418	0.38956	0.923113	35.4352	14.9345	4.92226	31.9325	47.7424	52.392	43.8865	37.0009	34.7313	8.05962
proteinId302569	PCON_12340	SMAC_08473	-2.9387	1.74546e-05	-0.113039	0.940444	-0.374714	0.617839	-0.459711	0.999874	-0.455181	0.998971	0.829859	0.255864	-1.10752	0.60277	1052.03	522.106	72.462	232.162	270.38	423.247	280.629	42.8973	142.39	126.723
proteinId302575	PCON_06050	SMAC_06861	-2.11599	0.00386691	0.0494661	0.976503	-3.58445	4.22484e-08	0.238408	0.999874	0.22382	0.998971	0.443049	0.570384	-0.351191	0.905623	34.2362	19.1134	4.30011	2.59467	48.5085	46.0654	49.5322	28.8175	44.4986	34.7516
proteinId302602	PCON_08102	SMAC_08457	0.654082	0.12105	-0.0981542	0.907722	-1.38597	0.000155912	-0.428674	0.999874	-0.104274	0.998971	0.537945	0.200392	-0.119457	0.956117	249.534	124.887	222.988	43.6848	106.177	161.883	137.882	149.598	205.618	148.094
proteinId302611	PCON_11984	SMAC_00895	-1.80341	0.00822053	1.78282	0.0141756	0.714614	0.257031	-0.292601	0.999874	-0.404853	0.998971	0.771423	0.24247	0.154469	0.964332	13.388	25.5863	2.05041	45.4997	27.7494	38.5605	26.5195	30.5584	33.6853	33.1301
proteinId302633	PCON_08418	SMAC_01332	-2.5164	2.64349e-07	-0.656808	0.324603	-0.906014	0.0529483	0.889495	0.460341	0.0405441	0.998971	-3.93453	1.07889e-15	0.741952	0.635341	64.8754	22.0136	6.26717	8.80203	39.1928	23.6468	22.3742	90.8108	65.7851	2.04188
proteinId302717	PCON_10189	SMAC_07908	-1.50553	3.63036e-05	1.08738	0.00679338	0.784781	0.0205028	-0.205476	0.999874	-0.37561	0.998971	-2.12458	2.00042e-05	0.766041	0.502174	78.5732	90.0192	15.6334	36.9088	23.0029	29.9484	21.2031	14.1133	9.45007	1.10341
proteinId302768	PCON_14197	SMAC_05873	0.584585	0.335133	0.789607	0.296814	-0.583991	0.303257	0.447761	0.999874	0.311989	0.998971	0.591733	0.319851	0.834122	0.638121	149.294	139.632	127.104	70.3879	182.133	149.644	171.262	128.021	78.7529	63.254
proteinId302818	PCON_07111	SMAC_05758	0.118499	0.856411	1.17603	0.0782842	1.70347	0.000712938	0.420061	0.999874	0.0597903	0.998971	-0.401083	0.509498	-0.657527	0.729004	19.3159	23.545	11.7502	25.0109	12.5403	10.4994	10.0652	8.41009	16.3075	5.99371
proteinId302894	PCON_02223	SMAC_07373	-0.190069	0.700255	2.48888	7.12078e-09	0.0728778	0.882509	-0.211737	0.999874	-0.0870093	0.998971	-1.90336	5.12673e-06	0.107377	0.964332	81.3326	249.802	40.4804	42.3851	42.8665	56.1158	48.488	70.9094	82.5553	11.4681
proteinId303030	PCON_10939	SMAC_07561	-0.879403	0.356091	1.88654	0.0741807	0.66989	0.465856	0.105743	0.999874	-0.133177	0.998971	-4.4643	1.15818e-07	-0.577198	0.850301	78.7169	167.004	23.3738	146.026	121.73	127.091	105.875	230.467	426.453	9.77305
proteinId303049	PCON_04715	SMAC_02632	-6.23464	8.16108e-14	-0.689739	0.467786	0.470721	0.491277	-0.400712	0.999874	0.00616353	0.998971	3.31831	1.10175e-07	-0.241566	0.93557	121.579	39.9933	0.585451	84.6935	56.3533	84.5496	77.9323	28.0964	47.2697	259.174
proteinId303050	PCON_02903	SMAC_00900	-3.17796	5.54921e-07	-0.0531949	0.972448	0.484083	0.464161	-0.628936	0.999874	-0.547112	0.998971	-1.20981	0.067272	0.0356314	0.994019	67.9497	35.0473	3.98352	31.7661	17.9805	31.7108	19.725	10.2327	13.1611	2.84833
proteinId303094	PCON_10151	SMAC_08062	-2.56415	NA	-1.75139	NA	1.23922	NA	0.748232	NA	0.186582	NA	1.54934	NA	0.398095	NA	102.659	15.6114	9.21973	73.9811	65.4884	43.3449	45.3262	50.1318	51.0589	81.4163
proteinId303103	PCON_02310	SMAC_05393	1.35737	0.119216	2.94644	0.00119225	-0.757139	0.377596	0.501065	0.999874	0.264672	0.998971	-0.871784	0.323231	0.266155	0.950145	1566.23	7128.18	2378.88	415.437	1268.06	992.477	1105.8	1691.93	1804.22	550.071
proteinId303131	PCON_11469	SMAC_06411	-1.88249	0.00162815	0.877479	0.267197	0.866155	0.135009	0.311572	0.999874	0.277512	0.998971	0.600078	0.343175	-0.795964	0.667657	159.463	159.172	23.5877	52.2322	43.7849	39.6514	44.3848	17.4713	36.7266	32.1315
proteinId303154	PCON_10675	SMAC_01612	-1.22598	0.0621332	-0.693506	0.444597	0.681831	0.279304	0.554364	0.999874	0.116966	0.998971	3.82797	1.53036e-10	0.565618	0.8059	43.0713	14.1163	10.1374	74.248	83.8254	63.6981	63.5872	49.5253	42.6579	351.5
proteinId303172	PCON_02490	SMAC_00356	1.47206	NA	2.4249	NA	-0.454769	NA	-3.51791	NA	-0.923742	NA	-0.00580796	NA	-0.253475	NA	1525.26	4675.37	2503.05	102.333	13.4434	195.304	91.008	1589.47	2469.28	1385.71
proteinId303198	PCON_11390	SMAC_04734	-3.97409	0.00102672	-4.20928	0.00141995	-3.38993	7.03718e-05	0.31346	0.999874	-0.200521	0.998971	-0.748545	0.445346	0.264493	0.956926	5.28599	0.0617937	0.0816499	0.713665	13.5251	12.1092	9.59206	12.8324	13.4076	3.43943
proteinId303214	PCON_02322	SMAC_02151	0.399739	0.49416	-0.202172	0.844494	-0.370326	0.51145	-0.235232	0.999874	-0.058666	0.998971	-2.63461	4.24448e-07	0.657323	0.696472	40.8815	18.8956	30.3676	9.78244	13.2446	17.639	15.4968	48.0202	38.6904	2.87566
proteinId303236	PCON_04399	SMAC_03921	-1.29404	0.00128775	0.776762	0.114266	-0.860878	0.028861	-0.109552	0.999874	-0.0840878	0.998971	-0.753964	0.0636216	0.666526	0.572056	122.077	112.52	27.9806	8.59076	17.5766	21.3987	18.5126	97.3942	72.4789	21.9745
proteinId303310	PCON_13780	SMAC_07805	-2.15098	7.82344e-06	-0.29723	0.721963	-0.343445	0.498851	0.304928	0.999874	0.152818	0.998971	-1.04084	0.0376626	0.1681	0.942902	91.7004	39.9362	11.4231	25.8742	50.8538	46.2594	47.2947	14.4522	14.6492	3.57957
proteinId303372	PCON_12770	SMAC_00209	0.877841	0.118234	0.296643	0.757176	-0.116864	0.850191	0.00137359	0.999874	0.196184	0.998971	0.462971	0.432763	-0.532731	0.782468	52.962	34.8297	55.7109	12.6859	17.0334	19.205	20.246	6.66126	12.37	9.46744
proteinId303408	PCON_12648	SMAC_06851	0.951513	NA	-2.81013	NA	2.31566	NA	-1.36048	NA	-2.05321	NA	2.68824	NA	-1.13659	NA	34.7732	2.1563	41.5884	15.8025	1.12617	3.82195	0.658985	10.4837	32.8231	120.957
proteinId303421	PCON_12068	SMAC_05821	2.28655	0.0132567	-1.84331	0.103829	-0.54366	0.57952	-0.566655	0.999874	-0.591063	0.998971	-4.89846	1.20068e-07	-0.193323	0.970852	13.7047	1.87947	41.4806	14.8514	17.8296	30.4424	18.1264	14.0672	20.5066	0.22865
proteinId303441	PCON_03280	SMAC_02525	-0.824047	0.279869	-1.62968	0.0537895	-1.21128	0.0734841	1.17825	0.596486	0.305021	0.998971	5.17364	1.25852e-14	0.0235056	0.994948	51.3758	8.69219	16.42	84.1826	574.963	278.357	318.637	50.8812	60.4297	1167.42
proteinId303458	PCON_13286	SMAC_02492	-0.664683	0.532735	0.59235	0.715546	-0.526066	0.610655	0.200732	0.999874	0.412691	0.998971	-5.1915	1.75059e-08	0.799697	0.812864	19.2821	15.9093	6.66349	7.23022	15.0559	14.6433	18.1833	148.324	102.784	0.97556
proteinId303512	PCON_07062	SMAC_07192	-0.717433	0.497489	-0.459575	0.791879	-2.41816	0.0069505	0.3128	0.999874	0.355674	0.998971	-1.87531	0.0506397	1.14406	0.71462	27.2059	10.4016	9.06905	1.9628	17.6013	15.744	18.817	137.389	72.1854	8.22586
proteinId303516	PCON_03221	SMAC_05324	-0.078335	0.905364	0.724337	0.324913	-0.104535	0.86607	-0.531538	0.999874	-0.497539	0.998971	-1.89969	0.00040036	0.28065	0.900996	26.9875	24.1178	14.5146	22.6981	20.7794	34.1715	22.0007	18.7705	18.5518	2.33987
proteinId303552	PCON_05576	SMAC_04646	-0.199419	0.755193	-0.140368	0.899599	-0.146174	0.76658	0.493199	0.999874	-0.132298	0.998971	-2.58931	9.07156e-10	0.199155	0.915459	5.32386	2.5558	2.5977	64.4843	125.912	100.375	83.9894	204.769	211.657	17.148
proteinId303556	PCON_14252	SMAC_06827	2.52562	0.00214531	-1.10385	0.327456	0.893544	0.281253	-1.26881	0.70211	-1.24478	0.753023	-3.27065	5.95879e-05	0.626024	0.830072	69.8624	16.6433	245.881	179.189	46.7449	132.565	49.0842	41.1682	31.9525	1.36819
proteinId303572	PCON_10783	SMAC_08678	-2.80693	1.81395e-05	1.64924	0.0246233	2.12791	0.000217031	0.000908038	0.999874	0.168771	0.998971	1.5728	0.0134306	0.121811	0.975216	145.529	254.411	11.1651	58.3088	16.0648	18.1157	18.7577	15.6116	20.8251	32.2656
proteinId303582	PCON_01939	SMAC_06481	0.230767	0.755652	0.748241	0.414583	-1.29183	0.0352699	0.17876	0.999874	-0.0256834	0.998971	-2.86351	2.82885e-05	-0.555707	0.812864	27.1468	24.6075	18.1011	7.53396	26.6816	26.4437	23.8393	4.13915	6.97697	0.532826
proteinId303665	PCON_05281	SMAC_02212	1.87107	0.0230477	1.3082	0.216304	2.73405	0.000198561	-0.506019	0.999874	-0.193677	0.998971	1.37202	0.097435	-0.489301	0.868588	162.27	226.026	358.998	440.296	53.9456	87.9642	70.0583	33.4764	61.3981	93.9529
proteinId303686	PCON_06425	SMAC_01314	-0.708194	0.211494	-0.372834	0.67094	-0.160833	0.788671	-0.922294	0.553152	0.285031	0.998971	0.194114	0.750938	0.289597	0.892153	132.064	54.2374	45.354	9.35152	6.74348	14.6396	16.3753	34.6296	31.7875	19.3746
proteinId303689	PCON_03981	SMAC_01083	-1.1737	0.113593	1.22039	0.180769	-2.23269	0.00056484	-0.160146	0.999874	-0.23091	0.998971	-1.67828	0.0177443	-0.216223	0.952957	218.902	280.732	53.5406	27.2342	146.704	185.738	144.186	368.484	546.909	93.604
proteinId303746	PCON_05917	SMAC_08733	-3.47915	3.40828e-09	-0.822053	0.286377	0.916304	0.0923041	-0.178782	0.999874	-0.459431	0.998971	-3.43351	4.87512e-10	0.102391	0.975216	28.739	8.60789	1.3743	77.3331	44.755	57.1897	37.9371	41.0909	45.2293	1.95495
proteinId30376	PCON_13156	SMAC_09013	0.471811	0.535469	-0.809513	0.400739	0.0564348	0.942301	0.570338	0.999874	0.107847	0.998971	-0.472081	0.524502	-0.0111815	0.99544	24.8111	7.51107	19.8959	14.3124	25.557	19.1281	18.9247	67.6837	86.9957	34.2219
proteinId303783	PCON_11289	SMAC_07600	0.432957	0.331465	-0.497025	0.397537	0.237631	0.5806	1.84057	2.69996e-05	0.268282	0.998971	-2.71899	5.6978e-10	-0.614919	0.638121	25.1592	9.50557	19.4511	37.8649	145.095	45.104	49.9688	8.42537	16.0168	1.2481
proteinId303802	PCON_13386	SMAC_02306	-1.94163	0.00532839	2.68261	0.00025223	-0.131421	0.867139	0.0701773	0.999874	0.618603	0.998971	-3.24604	8.02691e-07	1.54343	0.359288	75.1582	275.786	10.572	75.3204	107.653	115.459	165.176	1105.8	486.872	26.0015
proteinId303821	PCON_09747	SMAC_03060	-0.682245	0.185834	0.347789	0.660224	2.71457	2.54127e-10	1.88117	0.000885393	2.04781	0.000178136	1.43987	0.00272267	-0.0468633	0.989753	194.071	133.38	68.5867	68.4887	47.6883	14.3025	55.5328	29.3381	40.4246	58.1546
proteinId303836	PCON_07504	SMAC_03227	-4.05446	1.4998e-10	0.535371	0.593963	-3.36013	4.71456e-09	-0.0958165	0.999874	-0.237564	0.998971	0.846556	0.206517	0.127096	0.972532	141.962	111.135	4.40008	11.6509	147.704	178.42	138.223	56.5703	68.0234	67.9903
proteinId303844	PCON_13557	SMAC_03192	-4.1385	4.40922e-19	0.316727	0.603928	0.751873	0.0364548	0.0437974	0.999874	0.181471	0.998971	2.84851	4.93239e-15	-0.918743	0.30269	45.3819	30.6675	1.35013	94.2138	71.639	78.3389	81.7522	16.7183	39.493	146.067
proteinId303850	PCON_03693	SMAC_00101	1.17993	NA	-1.31407	NA	0.984865	NA	0.866376	NA	0.577085	NA	1.85988	NA	0.621058	NA	8.82947	1.85183	11.5107	37.5845	43.321	26.5323	36.5967	19.6517	15.0198	27.8215
proteinId303872	PCON_10943	SMAC_07022	1.19651	0.108527	0.454444	0.710543	-0.153564	0.853862	-0.366314	0.999874	0.202108	0.998971	-3.31476	7.02458e-06	-0.267667	0.933796	28.1731	20.9194	37.7577	8.16058	8.68402	12.7408	13.5302	11.8879	17.4949	0.910682
proteinId3039	PCON_11409	SMAC_06701	1.85531	0.00621858	-6.65199	1.03761e-20	-0.496717	0.482385	0.263225	0.999874	-0.258305	0.998971	2.43913	0.000220996	0.459079	0.84651	103.976	0.444391	219.131	36.6018	78.3521	73.0244	56.0328	16.4014	13.5706	38.7801
proteinId303904	PCON_13764	SMAC_00429	-0.142291	0.887634	-0.312616	0.84793	0.73052	0.396891	-0.500629	0.999874	-0.68078	0.998971	1.18015	0.172131	-0.0773708	0.989753	91.2626	38.9655	46.8023	89.6819	45.5423	73.9612	41.3009	37.5403	51.5637	69.9902
proteinId303919	PCON_04405	SMAC_06671	0.0545648	0.958075	-0.775083	0.510952	0.530899	0.527305	-0.225525	0.999874	-0.356491	0.998971	-3.39696	1.82051e-05	0.883062	0.760097	33.789	10.3024	19.8686	29.5718	21.5202	28.5594	20.2686	36.4618	24.0419	0.909966
proteinId303950	PCON_12375	SMAC_02373	1.39369	0.0248455	1.85005	0.00699034	0.418576	0.520659	-0.384459	0.999874	0.0238166	0.998971	-0.659413	0.307134	0.798924	0.676948	116.431	232.762	177.752	16.8697	11.727	17.4219	16.2294	188.177	143.582	48.1774
proteinId303952	PCON_10610	SMAC_03314	-3.38469	2.52089e-11	0.925506	0.128981	-3.46192	9.08617e-13	0.299581	0.999874	0.42818	0.998971	1.7446	0.000278062	1.04079	0.423639	32.5513	33.3025	1.69799	0.995987	14.9592	13.6713	16.8904	20.6248	11.9363	20.6737
proteinId303962	PCON_13823	SMAC_03968	1.38012	0.0258732	1.22384	0.100931	0.95694	0.101776	0.240668	0.999874	0.230039	0.998971	-0.0307901	0.966972	0.366074	0.868588	22.5623	28.7333	33.862	32.6013	24.33	23.1146	24.9515	67.095	66.9823	36.017
proteinId304011	PCON_13127	SMAC_01637	-0.892451	0.172829	0.352982	0.746295	0.500923	0.431481	-0.435353	0.999874	-0.00467181	0.998971	-4.38142	7.1396e-12	0.0269589	0.994019	230.961	160.349	70.014	87.2869	55.9705	86.0079	78.7654	52.8401	75.0515	1.61791
proteinId30402	PCON_06663	SMAC_08346	-2.96028	9.75143e-09	2.14494	7.18311e-05	-3.53195	2.14885e-12	-0.67681	0.899192	-1.03189	0.339812	-1.8444	0.000379497	0.368194	0.841927	40.8854	100.559	2.90988	1.14116	9.37527	17.0254	7.54678	17.2429	16.4478	2.30216
proteinId304067	PCON_06517	SMAC_08479	0.529402	0.270583	-0.00481108	0.996896	0.321595	0.490448	-0.411375	0.999874	-0.515343	0.998971	0.995117	0.0262325	-0.283218	0.858488	27.768	14.7582	22.7042	27.7163	20.6131	31.0446	19.838	17.9635	24.9652	27.2473
proteinId304123	PCON_13358	SMAC_04909	-0.283462	0.605108	2.52371	3.5957e-07	-2.43616	1.31164e-08	0.5117	0.999874	0.49182	0.998971	0.306083	0.564359	0.138555	0.958526	1843.03	5844.69	856.239	215.38	2126.97	1674.34	2173.86	1462.46	1859.79	1144.02
proteinId304161	PCON_08493	SMAC_02613	-0.994363	0.323259	0.26544	0.887354	0.753921	0.434172	-0.156472	0.999874	-0.17967	0.998971	-2.93796	0.00286901	0.796555	0.811715	33.7017	22.052	9.2082	33.2801	21.7834	27.5573	22.168	10.2296	6.96669	0.320793
proteinId304239	PCON_08258	SMAC_05783	-2.9522	8.17615e-06	0.0604395	0.969603	-1.72508	0.00326746	-0.17228	0.999874	0.497845	0.998971	3.35226	2.74164e-08	1.69139	0.175192	65.4586	37.1097	4.47293	19.8509	73.1412	93.2902	122.109	761.723	307.784	1775.3
proteinId304246	PCON_01624	SMAC_02439	0.514674	0.357465	-0.177098	0.862116	0.248211	0.654757	0.249728	0.999874	0.0156622	0.998971	1.07633	0.0377533	0.432974	0.813004	22.603	10.6879	18.4275	46.7452	58.7706	55.5333	51.5589	15.8608	16.1697	16.2045
proteinId304267	PCON_02554	SMAC_08828	-2.92027	0.00155709	-0.00476469	0.997728	-2.25516	0.00598149	-0.0428873	0.999874	-0.260832	0.998971	0.670854	0.484157	0.732898	0.813611	11.4566	6.05493	0.728789	7.27735	45.0708	52.4344	39.7929	75.8743	54.6806	40.6865
proteinId304290	PCON_10192	SMAC_01684	0.206402	0.789474	0.416448	0.715912	0.19917	0.789724	0.118741	0.999874	0.0802455	0.998971	1.90774	0.0038493	-0.413898	0.862576	126.754	91.1977	82.9521	86.8801	101.697	105.382	102.573	23.7813	42.8001	90.6614
proteinId304301	PCON_11794	SMAC_04330	-2.1024	0.0593037	1.14248	0.424323	2.37445	0.0097189	0.385662	0.999874	0.51981	0.998971	-3.08955	0.00153269	0.76822	0.828339	6.16857	7.69368	0.606998	50.4933	15.1081	12.8065	17.279	47.8875	34.3844	1.5386
proteinId304363	PCON_13352	SMAC_01583	-1.09145	0.0441546	-0.692272	0.338106	0.0229674	0.968692	0.59857	0.999874	0.471803	0.998971	1.62485	0.00171621	-0.750753	0.654474	103.077	33.7652	26.8124	57.2759	107	79.0098	101.145	22.0135	45.0938	79.8783
proteinId304372	PCON_14091	SMAC_07772	0.7115	0.22266	-1.01567	0.141901	1.90539	0.000110602	0.073272	0.999874	0.223802	0.998971	-3.24622	9.29317e-09	0.431491	0.827323	90.4341	23.7382	85.4155	141.339	48.7486	52.2127	56.177	23.9267	22.4601	1.21713
proteinId304390	PCON_11601	SMAC_03928	-2.51671	0.000418382	1.28285	0.158986	-0.635368	0.390908	0.363655	0.999874	0.222333	0.998971	-0.00529866	0.995266	-0.170115	0.966543	275.452	370.588	25.5365	61.8654	156.573	136.028	146.501	108.964	152.396	88.5275
proteinId304412	PCON_02829	SMAC_01835	-1.56963	0.00988261	-0.777661	0.3458	-1.21143	0.0313985	-0.130014	0.999874	0.125542	0.998971	-0.389138	0.554693	0.574091	0.787054	47.0875	14.503	8.67837	25.7293	68.9955	85.3202	85.4894	52.3574	41.0331	15.1516
proteinId304431	PCON_11336	SMAC_06588	-2.10716	0.000980267	0.987026	0.234157	0.53313	0.413277	0.10019	0.999874	0.315383	0.998971	0.216659	0.763579	0.112447	0.975353	151.126	164.436	19.1546	40.5472	36.7589	38.6646	44.4102	134.843	167.898	104.164
proteinId304452	PCON_06182	SMAC_04264	0.931291	0.103185	0.0370153	0.976597	0.581841	0.286761	0.131018	0.999874	-0.132052	0.998971	-0.440061	0.455013	-0.370578	0.84651	35.7143	19.6683	39.0215	91.4613	82.5101	84.7998	71.0701	46.4308	73.9555	26.1044
proteinId304493	PCON_08723	SMAC_05212	-1.04006	0.0757487	-0.661739	0.403485	-0.256688	0.673642	-0.423192	0.999874	-0.396791	0.998971	-4.08807	4.90595e-14	0.12903	0.966859	8.23414	2.76595	2.23875	5.90882	6.49244	9.87156	6.80987	26.4562	29.3004	0.784377
proteinId304498	PCON_08512	SMAC_05800	-1.73805	0.00307377	0.929436	0.226505	0.64943	0.268252	0.319965	0.999874	0.300698	0.998971	-1.97664	0.00061174	0.396627	0.84651	361.508	374.031	60.0317	181.903	180.311	162.033	184.5	89.6284	84.6814	11.6289
proteinId304499	PCON_08491	SMAC_01343	-1.4783	0.000237789	-0.615654	0.240968	1.48382	1.72356e-05	-0.202994	0.999874	-0.152435	0.998971	0.258085	0.566291	0.323047	0.822807	67.9938	23.8042	13.5927	261.891	100.185	130.295	107.624	17.149	18.0277	10.4332
proteinId304533	PCON_02932	SMAC_02935	-2.39131	1.91543e-07	0.288871	0.70412	0.0178119	0.970614	0.406774	0.999874	0.112035	0.998971	1.09032	0.0135611	0.0117468	0.995399	41.502	27.2457	4.34654	74.4457	122.457	103.651	103.144	55.0649	64.469	76.6675
proteinId304540	PCON_06947	SMAC_03808	-1.27086	0.189523	-0.0492247	0.982759	2.16034	0.0107039	-0.613614	0.999874	-0.462331	0.998971	-0.329145	0.752776	-0.536479	0.873601	63.1052	32.547	13.9044	393.403	66.4354	117.524	76.8051	21.6202	40.6277	18.7533
proteinId304577	PCON_10723	SMAC_01205	-1.67887	0.0112714	-0.0867318	0.955613	-1.34192	0.0296756	0.553069	0.999874	0.341684	0.998971	-1.76891	0.00639817	-0.0667759	0.989734	842.687	430.522	146.183	71.1745	338.186	256.833	301.072	291.923	439.56	62.9594
proteinId304588	PCON_11647	SMAC_07045	1.18233	0.0756497	1.77033	0.0164701	1.82034	0.00201034	-0.369134	0.999874	0.00372335	0.998971	-2.48515	7.18655e-05	1.26565	0.494199	150.077	285.43	198.878	110.836	29.1873	42.9364	39.3822	489.447	226.95	19.4039
proteinId304589	PCON_02094	SMAC_07214	-0.259042	0.776367	-0.322869	0.833436	-0.331011	0.703807	-0.677676	0.999874	-0.798867	0.998971	-2.99861	9.24595e-05	1.20797	0.629182	22.5432	9.57942	10.56	26.5011	25.4955	46.9795	24.1034	150.152	76.8092	4.04604
proteinId304631	PCON_05599	SMAC_03810	-2.45417	1.70054e-07	-0.370183	0.624223	2.01191	1.81002e-06	0.1612	0.999874	-0.0249945	0.998971	1.64268	0.000463587	-0.381885	0.827323	82.6501	33.9418	8.23933	143.516	49.0895	49.4674	44.5379	8.34417	12.851	22.8783
proteinId304646	PCON_10782	SMAC_00178	-1.80847	0.00702221	-0.569211	0.576611	0.821945	0.204092	0.2686	0.999874	0.230735	0.998971	0.220524	0.770628	1.2599	0.502174	40.106	14.3239	6.21887	41.7673	35.3027	32.8439	35.5336	27.4611	13.3167	7.36063
proteinId304654	PCON_02735	SMAC_00894	1.1392	0.150018	-0.678388	0.561024	-0.376834	0.653048	-0.20727	0.999874	-0.185651	0.998971	1.59816	0.033646	0.0219296	0.995399	23.4037	7.77331	30.6953	3.84108	5.305	6.94802	5.59394	9.60761	12.4041	22.007
proteinId304684	PCON_12115	SMAC_06142	-1.72021	0.00146833	-0.105243	0.926305	0.388832	0.475803	-0.0398102	0.999874	-0.120544	0.998971	0.555548	0.314118	-1.3629	0.203437	43.2083	21.584	7.26943	34.6823	31.8071	36.8962	31.114	20.3034	62.1678	52.3628
proteinId304697	PCON_03828	SMAC_05571	0.112546	0.869717	-0.012884	0.994632	0.544645	0.356586	0.210864	0.999874	0.224657	0.998971	1.41337	0.0143921	-0.133728	0.967589	41.7535	22.0603	25.5193	36.5219	35.9663	34.9481	37.5595	17.7088	22.5862	30.1386
proteinId304735	PCON_02042	SMAC_05726	-2.13476	0.00249821	0.517675	0.641438	-1.49908	0.0202924	-0.152337	0.999874	-0.250662	0.998971	-4.92682	1.41324e-08	-0.425923	0.867528	83.5476	64.9946	10.2559	20.4736	67	84.1147	64.6075	6.21375	10.2855	0.136054
proteinId304737	PCON_10614	SMAC_02146	-3.92513	5.05204e-07	-0.97317	0.36673	-5.47905	1.06037e-14	-0.390097	0.999874	-0.360662	0.998971	-2.20348	0.0038493	0.60585	0.827323	36.117	9.54847	1.18577	0.662062	31.1645	46.5317	32.9106	86.8613	68.1221	6.46356
proteinId304750	PCON_13558	SMAC_03939	-0.255398	0.728635	-1.5885	0.0356258	-0.926883	0.138581	-0.953044	0.754348	-0.652361	0.998971	2.55163	4.33536e-05	-1.74625	0.16516	359.214	61.4814	168.96	111.068	136.048	301.861	174.55	33.8165	143.294	501.039
proteinId304792	PCON_05240	SMAC_08431	-1.40859	0.0218482	0.530314	0.560932	-0.0374901	0.955591	0.250214	0.999874	0.243649	0.998971	-2.184	0.000671726	0.841288	0.667404	43.4824	34.1167	9.20533	12.924	19.7472	18.6347	20.3792	20.1714	13.1011	1.31393
proteinId304845	PCON_12385	SMAC_06347	-1.68075	0.0352475	1.1948	0.245109	0.557988	0.493327	-0.0546187	0.999874	0.268548	0.998971	-2.69046	0.000417484	-0.367539	0.913354	133.544	170.73	22.6007	72.601	57.6733	67.758	75.481	41.3619	67.5793	5.62235
proteinId304856	PCON_07668	SMAC_04154	-2.03199	0.0205302	1.94851	0.0545912	2.0267	0.0106948	-0.462747	0.999874	0.0130778	0.998971	0.648044	0.484394	-0.000655204	0.999546	39.0028	86.7391	5.07515	58.4208	12.2072	19.3337	17.9016	34.3581	41.4077	30.868
proteinId304879	PCON_08123	SMAC_07337	-2.77578	6.08313e-12	-1.28708	0.00440396	-1.23139	0.000815557	-0.702125	0.527629	-0.966202	0.133916	-4.95535	1.17432e-34	0.433476	0.762972	46.4561	10.023	3.72427	12.6192	22.6186	41.7906	19.4403	91.4203	82.0972	1.3023
proteinId304914	PCON_03636	SMAC_02473	0.414478	0.349887	-0.153487	0.84793	-0.392043	0.347121	0.52468	0.913528	0.120212	0.998971	1.31069	0.00103261	0.0568134	0.982337	146.436	70.8915	112.154	75.3539	178.425	139.1	139.401	74.5356	84.5323	110.598
proteinId304941	PCON_03733	SMAC_04229	-1.684	0.0106194	0.884144	0.309505	-0.642052	0.326427	-0.0362084	0.999874	0.163999	0.998971	1.63202	0.0106066	-1.1325	0.535623	162.79	164.132	27.6836	116.283	221.238	256.135	264.664	61.873	212.411	310.738
proteinId305000	PCON_07358	SMAC_05226	-0.410235	0.707538	-1.50403	0.232561	-0.303108	0.777893	-0.26296	0.999874	-0.558264	0.998971	-1.90044	0.0485717	0.793262	0.813611	22.6162	3.97982	9.42717	23.6102	30.2223	41.3099	25.1327	48.9471	34.1795	3.73572
proteinId305028	PCON_05643	SMAC_00560	-5.39201	6.47659e-10	-7.09204	1.50815e-14	3.179	0.00369077	1.88031	0.66016	1.88955	0.655676	-1.14191	0.217188	-0.199994	0.969182	244.512	0.73061	2.70879	0.82546	0.377816	0.0730425	0.389869	44.1195	61.6418	14.3291
proteinId305030	PCON_04133	SMAC_09536	-1.78027	0.00859536	-6.91707	1.6389e-22	1.00737	0.120209	-1.97812	0.0310656	0.941697	0.832731	-0.940942	0.175593	-0.381765	0.882561	199.155	0.696228	31.0157	140.386	20.7386	96.4521	173.011	195.047	329.78	89.661
proteinId305061	PCON_05425	SMAC_05131	2.28212	4.36022e-05	-0.629409	0.453004	-1.93269	0.000157552	-1.47186	0.0853496	-1.99714	0.00323935	-1.27634	0.0263423	-0.560587	0.778304	11.4625	3.92939	33.0035	10.9927	18.7457	59.8595	13.3428	8.53795	16.1969	3.51557
proteinId305103	PCON_01952	SMAC_06821	-1.05052	0.375706	1.55024	0.28415	1.48055	0.162627	-0.217451	0.999874	-0.20246	0.998971	-3.77198	0.000332006	1.43114	0.667657	12.2409	21.2113	3.10927	25.5859	8.96778	11.9314	9.38017	267.652	115.268	3.00889
proteinId305128	PCON_01764	SMAC_05237	-1.56936	0.00361281	-0.450485	0.588595	-0.158706	0.789724	-1.35318	0.105423	-0.372931	0.998971	-5.78577	8.4366e-13	0.0587274	0.986934	52.7658	20.4807	9.76011	24.3112	13.0392	38.2295	26.8817	19.6264	22.1765	0.141108
proteinId305139	PCON_04592	SMAC_02636	-1.58553	0.0308447	0.4771	0.689777	-0.622906	0.404644	-1.28844	0.501876	-1.70067	0.154825	-0.372912	0.641033	0.744721	0.762972	186.713	141.336	34.091	13.8347	10.6241	30.3831	8.21264	202.082	169.067	65.8329
proteinId305142	PCON_04170	SMAC_01693	-3.48476	NA	-0.447822	NA	1.4431	NA	-0.0867318	NA	-0.500416	NA	-4.72023	NA	1.36498	NA	21.0929	8.0692	0.838969	60.8343	24.6461	29.6083	18.6928	333.986	152.057	1.93824
proteinId305150	PCON_01759	SMAC_05227	-6.35526	5.30889e-10	-0.881895	0.436343	0.141792	0.875239	0.873577	0.999874	1.05443	0.881087	-4.37208	8.7028e-09	0.918001	0.729988	13.1162	3.71461	0.0279069	82.1361	176.905	106.193	208.201	135.733	86.4154	1.65971
proteinId305165	PCON_08745	SMAC_04014	-1.5119	0.00259882	1.01785	0.0929876	0.0518258	0.926901	0.136234	0.999874	-0.358712	0.998971	3.70743	3.49646e-15	0.552195	0.760832	91.084	99.7792	17.8578	105.085	138.342	141.443	100.966	69.1042	57.3405	395.749
proteinId305171	PCON_02564	SMAC_04682	0.955694	0.120173	2.07005	0.00123102	4.3138	2.7697e-17	-0.456245	0.999874	-0.791662	0.87951	-0.361672	0.578411	1.20306	0.457914	59.0679	138.635	66.5386	2185.19	95.5507	149.052	78.1622	95.984	53.7097	20.5191
proteinId305175	PCON_05763	SMAC_09269	-1.61153	0.000140437	1.58408	0.000627862	-0.219062	0.636198	0.0686973	0.999874	0.646774	0.756519	0.17323	0.723905	-0.105356	0.964332	271.284	447.261	50.2626	201.858	307.81	330.622	476.78	146.615	183.165	108.369
proteinId305176	PCON_05410	SMAC_07170	0.194908	0.802579	-0.173336	0.900426	2.16672	0.000390091	0.0901917	0.999874	0.0942284	0.998971	0.435777	0.556507	0.281055	0.923113	189.567	89.7429	123.372	482.398	137.776	145.522	143.099	49.5567	54.6196	40.0996
proteinId305178	PCON_06274	SMAC_01359	-0.281542	NA	3.06457	NA	-1.9937	NA	-0.316522	NA	-0.447976	NA	-4.19269	NA	-0.465529	NA	328.542	1650.19	152.93	52.8739	221.237	314.442	208.04	214.856	365.486	10.2152
proteinId305229	PCON_07026	SMAC_05025	-2.28752	0.00621858	-2.33489	0.0138506	-2.06368	0.00774982	-3.04185	0.00246162	-1.43091	0.536891	2.03404	0.0144242	-0.469709	0.888546	116.311	11.3748	12.405	8.09933	4.8992	50.9935	16.4198	5.93445	10.8822	26.1175
proteinId305272	PCON_05401	SMAC_02918	-0.121336	0.912897	0.36255	0.834788	0.160237	0.877618	-0.252818	0.999874	-0.234208	0.998971	1.55266	0.0918183	-0.36655	0.926272	25.9066	18.2622	13.5242	56.5214	52.0724	70.6788	54.6095	26.7123	43.4631	80.2944
proteinId305277	PCON_01175	SMAC_04667	-0.0512672	0.95828	1.21208	0.214553	1.04584	0.151496	0.128108	0.999874	0.756719	0.998971	-3.87083	3.55514e-07	-0.0894871	0.986407	33.5929	43.4099	18.6568	37.8493	24.9267	25.6412	40.6189	16.3821	22.1475	0.607093
proteinId305281	PCON_05404	SMAC_00311	-3.08451	0.000233517	1.89351	0.0619612	0.376681	0.687434	2.27595	0.0693128	2.00383	0.150111	-0.12154	0.902719	1.2884	0.635341	550.357	1190.14	33.2029	138.875	684.02	146.953	580.894	1236.81	630.105	329.473
proteinId305334	PCON_11546	SMAC_07567	-3.06004	0.000458013	1.47768	0.194005	1.07472	0.219576	0.822468	0.999874	2.2805	0.0836316	-2.4131	0.00556494	1.24611	0.655856	433.834	671.785	25.6638	1082.4	1132.36	698.707	3384.28	1009.32	533.248	50.3899
proteinId305385	PCON_07475	SMAC_00945	-4.25905	0.000186341	-0.9067	0.568763	-1.233	0.227841	0.110535	0.999874	-0.483943	0.998971	-4.42047	0.000887909	1.11313	0.762972	21.7545	5.92033	0.401623	14.1086	48.2731	50.1151	32.1706	6.88613	3.77213	0
proteinId305395	PCON_08256	SMAC_06905	-5.8025	9.55623e-07	1.04983	0.492531	0.0372915	0.973535	0.360345	0.999874	0.829508	0.998971	-2.65241	0.0104213	2.72381	0.199844	24.4642	29.1989	0.0687706	18.1755	28.6736	24.6743	42.1182	1124.13	183.869	11.424
proteinId305494	PCON_01433	SMAC_04608	-1.57048	0.0120022	-0.152308	0.902782	-1.7812	0.00129841	-0.247535	0.999874	-0.336106	0.998971	-1.5203	0.0124938	-0.553181	0.799532	17.7538	8.55748	3.31418	4.78183	17.3869	23.3641	16.8932	6.98704	12.9584	2.49976
proteinId305514	PCON_11120	SMAC_00452	-1.73909	0.000449303	1.92918	0.000271629	1.0311	0.0264199	0.211765	0.999874	1.17996	0.141414	0.298377	0.583991	-0.209245	0.923113	198.016	413.664	33.0743	117.379	81.7426	79.4741	167.258	102.606	162.83	101.21
proteinId305533	PCON_10497	SMAC_02949	-2.07668	0.000211017	1.70761	0.00328875	0.445991	0.402606	-0.0965927	0.999874	0.124432	0.998971	-0.618496	0.256761	0.0618294	0.986407	14.4377	25.7441	1.83588	63.025	53.5299	64.6827	64.787	41.6244	47.233	16.7407
proteinId305560	PCON_02939	SMAC_04882	1.77894	0.00183728	1.62307	0.0127766	-1.01886	0.062594	0.919749	0.632664	0.421555	0.998971	-2.21908	6.78892e-05	0.852042	0.638121	25.8762	44.2492	52.2872	12.2618	59.6281	35.0457	43.4309	69.179	48.4707	4.71111
proteinId305569	PCON_13132	SMAC_06728	-3.76272	7.46753e-12	-0.00788921	0.996377	0.423039	0.472326	-0.0977183	0.999874	0.0888516	0.998971	-4.84468	6.62902e-19	0.743057	0.675837	101.317	53.8759	3.9534	122.242	106.063	128.071	125.085	154.662	101.925	1.70213
proteinId305572	PCON_13782	SMAC_08357	-0.378854	0.635863	-1.56453	0.0632478	1.72306	0.0081182	0.584293	0.999874	0.460877	0.998971	3.73901	2.99989e-08	-0.106957	0.980807	1146.43	199.387	492.354	585.228	324.672	240.688	307.812	30.7815	43.7186	354.742
proteinId305577	PCON_09035	SMAC_09634	-2.2933	2.38677e-05	0.374016	0.682376	1.70354	0.000679067	-0.132583	0.999874	0.460989	0.998971	-3.30591	4.93565e-10	0.58919	0.762972	246.338	172.408	28.0112	140.382	47.598	58.9744	75.1131	292.699	246.756	12.5711
proteinId305594	PCON_10429	SMAC_07662	-6.60716	1.00591e-10	1.14773	0.449733	-0.119599	0.922489	-0.916121	0.999874	2.23204	0.273721	-8.18115	8.52462e-13	1.7515	0.578155	2102.28	2611.32	8.505	20.1927	13.1569	29.8726	146.349	262.105	84.2247	0.0258586
proteinId305624	PCON_03058	SMAC_00368	0.910905	0.159861	0.0333533	0.982759	-2.3511	9.92537e-05	0.16093	0.999874	0.463713	0.998971	-0.795096	0.220714	-0.233745	0.932822	49.376	27.1498	53.6315	1.29298	9.4395	9.49093	12.094	18.1259	28.4113	7.4342
proteinId305645	PCON_11914	SMAC_04078	-3.62216	1.51435e-08	-0.952708	0.245701	2.60191	1.96421e-06	0.0894608	0.999874	-0.041427	0.998971	-2.35825	7.90178e-05	0.335229	0.890978	42.4732	11.5534	1.80452	136.091	28.7554	30.4041	27.1792	98.1468	101.281	8.71975
proteinId305676	PCON_13657	SMAC_09163	-0.592997	0.332145	1.22202	0.0723771	-2.39164	2.97182e-06	-0.238185	0.999874	-0.197847	0.998971	-2.92122	1.39919e-07	-0.240191	0.923113	188.686	238.714	69.6791	9.18469	51.6564	69.0605	54.9075	39.8664	54.0712	3.89416
proteinId305681	PCON_08254	SMAC_04862	-4.06452	7.93381e-05	0.578961	0.721309	-4.46793	1.94898e-07	0.243614	0.999874	-0.0308676	0.998971	1.13792	0.245673	0.057869	0.994019	46.5022	38.1515	0.992438	1.59181	59.6862	56.3001	50.4587	323.713	386.359	527.001
proteinId305706	PCON_09176	SMAC_02939	2.56747	1.04021e-07	-3.51426	3.34009e-11	-0.493708	0.327472	-0.988653	0.359165	-0.979658	0.349021	0.200807	0.72424	0.32005	0.853434	34.7777	1.52793	119.407	37.0242	32.5461	73.6816	33.8326	31.693	30.3306	17.2615
proteinId305710	PCON_09164	SMAC_01391	-4.29859	2.15812e-11	0.994016	0.198838	1.86456	0.000560816	-5.247	1.10542e-17	-1.12705	0.400841	-0.702157	0.27327	-0.422152	0.843798	31.116	33.4121	0.803371	188.913	1.51288	71.4783	29.5415	6.91462	12.5718	4.08703
proteinId305716	PCON_09805	SMAC_00229	-0.876493	0.230407	1.03353	0.255369	-4.59497	2.52695e-14	0.213749	0.999874	0.461306	0.998971	-3.30942	4.89542e-07	-0.0866249	0.985374	1792.24	2008.69	544.697	17.0128	640.608	620.562	791.159	1109.25	1549.66	80.2519
proteinId305738	PCON_08259	SMAC_05177	-2.65996	6.14995e-05	1.71137	0.0296855	1.37271	0.0307942	1.69957	0.109692	1.86987	0.0486369	0.256898	0.740238	-1.24552	0.512733	1648.88	3073.64	143.211	251.44	393.219	131.639	459.847	71.9434	253.225	140.764
proteinId305759	PCON_02408	SMAC_04617	2.18295	0.00456535	-0.813315	0.463568	1.73503	0.0152641	-0.0647086	0.999874	-0.278669	0.998971	1.53238	0.0476611	-0.637432	0.813611	67.5154	20.0618	183.746	156.222	53.2757	62.8767	47.2694	31.479	62.9747	110.146
proteinId305802	PCON_02301	SMAC_02934	-2.11613	6.3359e-05	-0.403339	0.63883	0.689473	0.188582	0.185491	0.999874	1.06036	0.339812	4.7481	3.39004e-21	-0.0976298	0.975216	195.642	80.0534	25.211	53.4378	46.1861	45.6785	88.5986	46.8512	65.5443	986.993
proteinId305835	PCON_09186	SMAC_00422	1.799	0.0269074	-0.816772	0.486488	0.376585	0.667979	-0.11826	0.999874	0.051737	0.998971	-1.16265	0.162734	0.650626	0.818484	39.1737	11.6594	82.1592	19.4343	16.93	20.792	19.8588	38.5383	29.7415	5.85624
proteinId305867	PCON_10454	SMAC_04271	1.86714	0.00578167	-0.365967	0.76372	-0.573047	0.406719	-0.0618902	0.999874	-0.338518	0.998971	1.02919	0.136671	0.648233	0.78379	9.25859	3.84202	20.0733	21.2452	37.9152	44.6628	32.2006	21.8126	17.2318	16.6054
proteinId305926	PCON_07724	SMAC_01261	-0.56629	0.257396	-0.0346073	0.975884	-0.757228	0.0881846	-0.134195	0.999874	-0.117611	0.998971	3.6031	2.24317e-16	-0.186242	0.927488	32.3441	16.9432	12.4061	28.4086	54.5886	67.6935	57.0891	21.8547	33.0908	216.849
proteinId305929	PCON_09168	SMAC_02999	-3.8879	4.70164e-05	0.118115	0.936599	0.0326511	0.963324	-0.218916	0.999874	-0.111282	0.998971	0.736688	0.279914	-0.34848	0.896276	15.1744	8.82912	0.310886	83.011	88.1811	116.205	98.6498	4.63691	8.20362	7.33832
proteinId305963	PCON_09806	SMAC_04348	2.23627	0.00287394	-1.15855	0.249707	-0.224276	0.790437	1.49769	0.356471	-0.459019	0.998971	6.54397	6.49823e-20	1.04882	0.667404	18.0045	4.15199	51.3773	6.89911	29.15	11.197	7.40292	7.52272	4.64042	269.941
proteinId306001	PCON_01301	SMAC_08256	-3.98958	1.00106e-11	1.11503	0.0953696	1.9469	7.37857e-05	-0.269058	0.999874	-0.358425	0.998971	-0.119246	0.851217	0.181438	0.945665	70.5387	83.706	2.36505	158.548	41.6799	56.8468	40.5024	103.648	109.461	54.6419
proteinId306082	PCON_01310	SMAC_06468	0.940121	0.140066	-1.17732	0.125745	1.29332	0.0209242	0.287596	0.999874	-0.872105	0.79581	-2.0867	0.0003837	-1.01533	0.564047	12.4245	2.86823	13.9176	76.959	47.1082	43.269	21.3822	28.1159	68.2134	8.6917
proteinId306092	PCON_10867	SMAC_05533	-0.0764429	0.904528	-1.4959	0.0147126	-0.358274	0.50864	-0.196559	0.999874	-0.331777	0.998971	-0.692316	0.20532	-0.408347	0.827323	20.3432	3.76116	10.8997	23.7973	33.4464	43.3332	31.4566	11.4589	19.1397	5.56288
proteinId306149	PCON_12867	SMAC_00472	-0.208534	NA	1.45963	NA	1.3408	NA	0.0864158	NA	-0.104222	NA	0.553513	NA	-0.116931	NA	182.026	269.6	88.2465	279.866	145.079	153.852	131.484	37.0325	50.1276	39.3004
proteinId306150	PCON_13963	SMAC_12092	-2.89799	9.96297e-07	-0.981126	0.211445	0.964911	0.0939912	0.293041	0.999874	0.477264	0.998971	-0.294876	0.663221	-0.205716	0.942902	150.802	40.1869	10.8821	156.975	124.369	113.864	146.783	80.0663	102.522	43.7379
proteinId306197	PCON_07292	SMAC_07128	1.09241	NA	-6.74626	NA	-2.83709	NA	-7.32449	NA	-7.28949	NA	2.798	NA	0.648079	NA	1895.24	1.6617	2529.95	75.5649	1.17185	1122.81	1.2757	122.481	89.3419	390.27
proteinId306224	PCON_02065	SMAC_02232	-5.025	2.86276e-06	-0.998834	0.120865	0.606498	0.139986	-0.377658	0.999874	-1.00112	0.150714	0.741678	0.0882612	0.473482	0.760832	8.31612	2.17701	0	42.2791	26.6886	39.2218	17.8311	20.4599	17.8738	15.3344
proteinId306235	PCON_09022	SMAC_05549	-4.77492	9.34911e-16	0.504189	0.47731	1.44384	0.00101333	0.12472	0.999874	0.407084	0.998971	1.06316	0.0287583	-0.135139	0.959679	37.5242	28.6751	0.668426	145.203	71.9784	74.3429	90.713	40.607	49.4727	55.2315
proteinId306256	PCON_13772	SMAC_08580	-2.32531	6.46966e-05	-0.815008	0.294421	0.00754778	0.989698	-0.158155	0.999874	0.185038	0.998971	2.82941	2.97113e-07	-0.0206666	0.994019	17.9568	5.36967	1.92047	25.4667	28.4441	35.8336	37.4161	5.45616	7.22137	28.8571
proteinId306301	PCON_02793	SMAC_12593	-2.9943	1.93051e-10	-1.19822	0.0250093	-2.0513	1.14248e-06	-0.750402	0.616508	-0.120613	0.998971	1.38187	0.00196031	-0.102659	0.969182	59.0653	13.6802	4.10658	4.64862	13.8753	26.4845	22.3731	20.9735	27.7682	39.3942
proteinId306332	PCON_09026	SMAC_05502	-3.191	0.00072996	-0.0919837	0.969184	-1.26205	0.160698	0.00993873	0.999874	0.191019	0.998971	2.97111	0.000815901	-0.456021	0.904182	35.8636	17.909	1.89117	4.1568	12.859	14.4053	15.201	16.6453	30.9629	150.447
proteinId306356	PCON_02904	SMAC_00901	-6.59342	1.61874e-16	-0.359922	0.792194	1.02629	0.160698	0.591791	0.999874	0.126102	0.998971	-3.00511	3.68778e-05	0.183163	0.964332	120.975	50.3973	0.527198	58.37	53.7549	39.5891	39.8133	77.9183	84.2327	4.46548
proteinId306396	PCON_02894	SMAC_04868	-2.52529	0.0170078	-0.847381	0.605579	-1.51007	0.143319	1.96754	0.416685	2.16609	0.292961	-1.10689	0.315246	0.587026	0.8853	120.918	34.5451	10.2981	1.80453	28.7338	7.3398	34.4317	94.0079	76.1964	14.5225
proteinId3064	PCON_09053	SMAC_06528	2.51553	6.66432e-09	-2.76901	5.1888e-09	0.219475	0.653048	-0.0270657	0.999874	-0.527999	0.998971	2.76534	1.19888e-10	-0.614554	0.667404	22.9966	1.75376	76.4787	28.6696	29.9457	34.3648	21.8286	10.3067	19.0434	65.6093
proteinId306456	PCON_03174	SMAC_03525	-1.10522	0.113549	-0.0731233	0.965624	-1.87864	0.00223356	0.573588	0.999874	0.324239	0.998971	0.227271	0.767627	-0.00588971	0.997152	333.636	169.744	85.781	11.2028	79.5908	59.5468	68.8803	30.2237	38.7663	25.7479
proteinId306501	PCON_01361	SMAC_08713	-5.42403	4.69353e-12	0.238775	0.874053	-0.26234	0.754923	-1.0483	0.830083	-0.634302	0.998971	-1.75698	0.0191665	0.73847	0.779363	60.0705	38.1883	0.618513	35.0239	24.7562	59.4977	34.5339	345.895	251.096	32.5271
proteinId306517	PCON_01871	SMAC_03500	-0.723463	0.170037	0.223611	0.807621	1.51565	0.000596449	0.478467	0.999874	0.132498	0.998971	-3.44571	3.91413e-09	-0.59655	0.729004	33.6298	21.151	11.4048	63.5194	38.1472	30.7178	31.0274	6.58502	11.9738	0.576782
proteinId306621	PCON_11408	SMAC_07243	1.08652	0.0919876	6.27838	3.23656e-27	-1.95074	0.000293797	1.17426	0.359165	2.29689	0.000782123	3.76152	1.03406e-09	1.16131	0.535623	5.29441	245.35	6.48741	19.9054	224.033	110.107	513.955	2.98065	1.8492	11.8088
proteinId306694	PCON_06795	SMAC_04408	-1.37737	NA	0.308859	NA	-2.39332	NA	-0.150496	NA	-0.127056	NA	2.22276	NA	0.305627	NA	194.86	129.626	41.2718	71.9234	435.804	546.736	458.182	142.722	144.688	399.011
proteinId306705	PCON_07608	SMAC_07559	-4.07316	1.63721e-06	1.78992	0.0906049	1.6274	0.048815	0.0679828	0.999874	0.103168	0.998971	-0.141781	0.8893	-0.109177	0.985915	423.889	854.708	12.4409	451.026	181.83	194.875	193.051	259.424	345.04	182.109
proteinId306724	PCON_11622	SMAC_05100	-3.69977	9.72849e-15	-0.651239	0.237513	-1.51938	2.82396e-05	-0.076741	0.999874	-0.271184	0.998971	0.217047	0.630072	-0.181312	0.917839	12.0354	4.07456	0.493241	18.1332	61.8081	73.5071	55.75	16.7707	22.3568	13.218
proteinId306782	PCON_06788	SMAC_07097	-0.78505	0.175347	-0.177788	0.866711	1.32131	0.00518222	-0.590155	0.999874	-0.664253	0.926951	-0.186442	0.765356	-0.765623	0.658801	10.1182	4.74702	3.30056	65.2164	21.077	36.0124	20.7153	2.78628	5.722	2.7407
proteinId306793	PCON_02744	SMAC_00494	3.60622	NA	-4.13459	NA	-2.27803	NA	-4.94786	NA	-5.26108	NA	1.52779	NA	0.636208	NA	75.1294	1.83291	586.531	13.3876	2.28868	101.323	1.87449	23.6518	19.2365	33.8726
proteinId306805	PCON_12606	SMAC_01815	0.814825	0.489808	-3.04048	0.0180909	7.98577	8.09964e-18	-0.290595	0.999874	-1.62628	0.745619	7.24745	5.748e-13	-0.0312871	0.995399	22.7507	1.09545	24.3431	2305.13	6.61409	9.34078	2.46588	3.88069	4.89259	543.923
proteinId306815	PCON_10922	SMAC_04411	-1.42783	0.269143	-1.66922	0.303416	-2.64753	0.00572952	-0.210138	0.999874	-1.01974	0.998971	-1.59584	0.133359	0.817834	0.824063	2.54945	0.231081	0.299944	12.6223	97.311	128.132	55.2423	140.589	95.5474	13.1257
proteinId306821	PCON_03997	SMAC_06634	1.61419	2.00544e-05	-0.404021	0.476976	0.358269	0.361088	-0.00323089	0.999874	-0.254012	0.998971	2.02814	4.92199e-08	0.184833	0.913322	42.5262	17.1086	73.8734	65.3357	63.0726	71.2394	54.7165	19.3314	19.6343	42.6579
proteinId306882	PCON_04008	SMAC_05353	-2.44551	0.000304545	-0.797825	0.40837	2.05386	0.000931578	0.139182	0.999874	-0.12615	0.998971	3.08916	2.60259e-06	0.570254	0.813611	133.258	40.7068	13.1393	220.422	70.482	71.9961	60.2466	27.5442	23.9737	116.685
proteinId306887	PCON_04004	SMAC_05134	-0.205456	0.721995	-0.530832	0.468282	1.98713	1.03059e-05	-0.217332	0.999874	0.0113398	0.998971	0.706376	0.188046	-0.485672	0.795517	88.7072	32.5884	43.3061	138.762	37.2045	48.864	45.2059	5.80429	10.539	9.35526
proteinId306893	PCON_12595	SMAC_07090	2.01549	0.0162571	-0.186304	0.916884	-0.678769	0.438116	0.641763	0.999874	0.405447	0.998971	-1.13626	0.18721	-0.0746752	0.989753	38.7	18.0886	94.7022	5.53658	17.6731	12.488	15.4247	24.1076	31.2685	6.1698
proteinId306899	PCON_04014	SMAC_04404	1.6191	0.000277823	-0.802323	0.16513	-0.484555	0.285522	0.31531	0.999874	0.340628	0.998971	0.815105	0.076915	-0.0390923	0.991439	38.2986	11.7096	67.6755	21.2126	46.3311	41.8474	48.7594	17.2057	21.9589	18.7194
proteinId306901	PCON_09870	SMAC_02609	-4.96193	5.44893e-06	1.19673	0.282379	1.37728	0.0817301	-0.449826	0.999874	-0.155563	0.998971	-1.6812	0.0424703	0.744503	0.800668	6.12117	7.80883	0.0392975	29.8993	9.97918	15.5978	12.7922	108.485	80.7885	13.7212
proteinId306952	PCON_06867	SMAC_08844	-0.119669	0.898899	-0.866251	0.43833	-1.68984	0.0205386	-0.171783	0.999874	-0.389027	0.998971	-1.39784	0.0795	0.599432	0.829185	21.0082	6.03756	10.9545	4.56939	16.7637	21.3888	14.8392	17.9747	14.2248	2.39403
proteinId306953	PCON_06884	SMAC_08869	-4.07947	NA	-0.042228	NA	-3.13409	NA	0.337962	NA	0.0364308	NA	1.2192	NA	-0.528993	NA	2905.65	1544.96	87.2908	78.0334	1196.75	1056.91	996.583	314.143	591.472	797.786
proteinId306998	PCON_02442	SMAC_03757	-1.03538	0.0474759	0.859805	0.181154	0.696234	0.154081	0.111914	0.999874	0.427012	0.998971	-10.585	4.01446e-25	0.12571	0.963972	13.4763	13.2264	3.68461	10.5151	8.65352	9.02458	11.1951	69.6712	69.7356	0
proteinId307012	PCON_03931	SMAC_05629	-1.26049	0.188808	-0.0234094	0.993956	3.3566	3.67417e-05	0.284729	0.999874	0.0822966	0.998971	-2.81721	0.00212319	-0.0881541	0.989753	127.952	67.4183	28.5274	340.396	46.8844	42.8901	41.8339	12.6242	16.6378	0.894656
proteinId307016	PCON_07075	SMAC_01174	-2.59207	7.90649e-05	-4.53556	2.70332e-11	1.63424	0.00787338	0.946601	0.800798	4.09565	1.77705e-09	2.88005	7.24087e-06	-0.367096	0.890978	108.317	2.3109	9.95747	23.7861	18.1372	10.3867	176.871	13.9302	20.6232	87.6832
proteinId307020	PCON_07982	SMAC_00748	-0.838285	0.176926	-0.835181	0.286907	0.532996	0.366504	-0.220557	0.999874	-0.444703	0.998971	-4.84923	9.28043e-12	0.337345	0.878522	18.3668	5.44609	5.71247	33.0128	24.2451	31.9383	21.4103	9.3302	8.77741	0.117483
proteinId307033	PCON_02272	SMAC_04323	-0.339492	0.660058	0.541907	0.610863	-2.88181	3.13054e-06	0.464035	0.999874	0.24906	0.998971	-1.28957	0.0580821	0.430223	0.853434	24.1535	19.1078	10.7569	2.60332	35.1513	28.4784	31.1778	52.3186	45.6545	8.68944
proteinId307042	PCON_03959	SMAC_09387	-0.687956	0.488767	-1.11682	0.371427	4.77188	1.78465e-09	-1.19568	0.878385	-0.184492	0.998971	-3.67299	2.58181e-05	0.906581	0.770989	29.3207	6.85893	9.90043	752.892	12.6874	34.411	27.3523	53.1113	34.0774	1.01763
proteinId307066	PCON_06917	SMAC_03791	-0.471737	0.674701	-4.50706	7.83566e-05	-3.10008	0.00188695	-4.91893	0.000311271	-5.64853	4.04331e-05	-2.0017	0.0551058	0.270746	0.959679	21.8718	0.396674	8.6949	0.393918	0.0917948	5.86095	0.0456211	13.0912	13.4694	1.41111
proteinId307142	PCON_14137	SMAC_06726	-2.40411	9.44126e-07	-0.251078	0.776123	0.957878	0.0363539	-0.413862	0.999874	-0.11642	0.998971	-0.31288	0.557235	-0.357672	0.840463	33.1189	14.864	3.42685	25.179	11.878	17.9223	15.1389	21.9148	35.5924	15.3492
proteinId307146	PCON_03827	SMAC_07691	-2.55089	0.000411362	-1.94739	0.0170397	1.7898	0.00455714	-0.535986	0.999874	-0.783998	0.998971	-4.22781	6.41968e-10	0.549112	0.822807	18.1411	2.42628	1.66934	100.448	23.8907	39.4792	20.7283	28.2765	23.2735	0.546596
proteinId307199	PCON_10566	SMAC_00176	-0.322542	0.626879	-0.223708	0.844786	-2.503	1.70719e-06	-0.0648315	0.999874	-0.387019	0.998971	1.17751	0.045899	0.181037	0.952957	95.3678	43.4107	42.8787	32.567	226.892	268.069	186.992	50.3842	56.3656	72.2414
proteinId307225	PCON_14006	SMAC_00330	0.396459	0.608039	-1.00883	0.272411	1.23725	0.0516358	-0.908534	0.865799	-0.766621	0.998971	-6.0414	4.25843e-14	0.35009	0.900996	12.9145	3.35868	9.7746	50.7371	13.7708	29.7175	15.7583	16.841	16.438	0.0844681
proteinId307281	PCON_02675	SMAC_07744	-3.24256	4.80829e-06	-1.10198	0.249798	-1.77548	0.00847864	-0.778225	0.999874	0.999141	0.846376	-3.41795	1.05986e-06	0.433566	0.869365	212.932	51.3014	11.5217	8.10838	20.1655	39.7146	74.9097	115.463	100.862	4.20489
proteinId307393	PCON_09573	SMAC_03123	-1.1374	0.0607171	0.148683	0.901537	0.356822	0.56116	-0.258409	0.999874	-0.45884	0.998971	-1.31432	0.0234405	0.442076	0.830072	12.0214	7.14639	3.01467	38.439	31.2603	42.3335	28.021	27.2917	23.3366	4.5232
proteinId30741	PCON_12937	SMAC_03648	-0.627233	0.321098	0.697288	0.397537	-0.440841	0.470459	0.00539962	0.999874	0.295679	0.998971	2.02072	0.000412457	-0.567306	0.784966	288.186	251.939	104.192	44.1977	74.9298	84.2023	95.3035	25.8008	48.6511	114.46
proteinId307420	PCON_05043	SMAC_01935	-2.5403	4.28677e-06	0.421546	0.608149	0.00860112	0.987358	-0.472475	0.999874	-0.204581	0.998971	1.91172	0.000122967	0.109507	0.970852	16.7338	11.8629	1.53529	71.7654	63.6678	100.16	79.5521	63.762	73.1167	140.963
proteinId307424	PCON_04314	SMAC_02084	-3.57174	1.43407e-12	-0.638407	0.343135	-2.77692	1.04777e-10	-0.103784	0.999874	-0.475192	0.998971	1.20352	0.01279	-1.34318	0.149106	47.5908	16.3422	2.11785	12.4167	100.519	121.809	80.0965	20.3926	58.8687	75.9151
proteinId307461	PCON_10334	SMAC_02093	1.52368	0.00664389	-1.67496	0.00823055	1.5201	0.00300603	1.22953	0.241812	0.787224	0.832731	1.14353	0.0744864	0.237652	0.933796	102.716	16.7201	169.717	54.3347	55.8025	26.3658	42.3115	2.81343	2.9922	4.23619
proteinId307541	PCON_07638	SMAC_05441	-2.54974	2.78462e-06	-0.358459	0.674618	1.74233	0.000126317	1.52671	0.0234893	1.13833	0.19102	2.00405	4.11792e-05	-0.698303	0.667404	22.2134	9.27527	2.03617	136.489	146.571	56.3813	115.207	24.8011	46.8567	99.2042
proteinId307545	PCON_08383	SMAC_06684	0.723165	0.311459	-0.621943	0.533591	0.500762	0.466835	-0.109753	0.999874	-0.0330747	0.998971	-5.83701	3.9006e-13	0.72349	0.762972	27.2068	9.31712	25.7629	80.0976	65.2854	79.5039	71.358	16.9311	11.7112	0.0670259
proteinId307610	PCON_07927	SMAC_02271	1.76047	0.083661	-0.866922	0.575416	2.03105	0.0322507	-1.6515	0.699108	-0.819424	0.998971	-3.86572	0.000179583	0.478658	0.907355	5.14906	1.42133	10.5	3.6701	0.275848	1.13937	0.546895	10.6135	9.40283	0.235657
proteinId307617	PCON_03782	SMAC_06772	-4.08996	NA	0.026934	NA	1.83759	NA	0.726163	NA	1.05569	NA	0.866208	NA	0.156632	NA	1080.03	598.058	33.1361	306.757	175.552	117.698	229.995	420.793	473.937	495.198
proteinId307658	PCON_03859	SMAC_05541	-0.666863	0.267401	-0.962127	0.181731	-0.474482	0.419229	0.410312	0.999874	0.442116	0.998971	-0.474955	0.441168	0.242331	0.921567	41.8114	11.4169	14.8487	8.60425	20.1495	17.0019	21.341	13.8135	15.0568	4.90418
proteinId307675	PCON_03861	SMAC_05540	-5.21516	1.53729e-17	-0.145896	0.893037	0.251792	0.66494	1.31187	0.123354	1.07396	0.320925	0.619094	0.266969	0.401117	0.831276	61.8021	29.7472	0.810366	36.0881	95.6009	42.7044	83.5567	114.523	99.7304	78.1063
proteinId307679	PCON_14222	SMAC_00861	-2.45008	0.0240978	-0.309676	0.885801	-2.62831	0.00753263	0.152749	0.999874	-0.365602	0.998971	-1.43911	0.187653	0.542282	0.902403	13.3875	5.68238	1.19056	2.46736	23.8857	24.0047	16.7658	78.6178	65.3232	9.99362
proteinId307712	PCON_14120	SMAC_08445	-1.46971	0.0269845	-0.717512	0.440412	-1.80146	0.00246053	-0.547362	0.999874	-0.0410628	0.998971	2.61705	2.9965e-05	-0.050365	0.99246	61.0261	19.5161	12.0692	16.0494	48.5051	80.7658	71.9158	72.5301	87.8815	277.185
proteinId307723	PCON_04638	SMAC_06745	-2.09968	0.00247938	-0.941329	0.309777	-1.43055	0.0266074	-0.0159956	0.999874	0.150899	0.998971	1.33344	0.0526882	0.927709	0.667404	49.2335	13.407	6.21704	8.87435	29.9385	34.1069	34.9214	78.2407	51.1054	60.8403
proteinId307729	PCON_02421	SMAC_02390	1.76904	0.00184946	-1.21401	0.0798473	1.20595	0.023252	0.233866	0.999874	0.0320608	0.998971	2.62204	1.71163e-06	-0.217055	0.930969	45.4414	10.2213	89.5518	166.484	103.978	99.2528	93.155	23.1161	35.3427	121.041
proteinId307764	PCON_03860	SMAC_05542	0.951534	0.318592	1.98258	0.0602431	2.42542	0.00280925	0.17204	0.999874	0.0854871	0.998971	1.68814	0.0586462	0.160084	0.975216	1449.17	3344.57	1665.81	1401.79	335.501	333.645	325.401	576.939	671.464	1314.03
proteinId307822	PCON_03146	SMAC_08636	1.2757	0.0522234	-1.48079	0.0640681	0.606706	0.344229	-0.515884	0.999874	-0.936601	0.774809	-3.4601	1.43034e-07	0.378795	0.869534	4.81918	0.888759	6.78166	17.0004	9.55159	15.5328	7.32158	11.202	10.3518	0.42024
proteinId307826	PCON_02009	SMAC_03688	2.48593	0.00111073	-0.0993573	0.956984	0.0209169	0.979849	-2.92435	0.00271877	-3.83219	2.46415e-05	-3.48624	1.31974e-05	0.710442	0.799532	10.5093	5.26245	35.6714	3.19858	0.460784	4.41037	0.243741	7.27902	5.1823	0.191275
proteinId307860	PCON_14275	SMAC_03513	-1.3365	0.0345006	0.90449	0.2489	-1.48686	0.00665645	0.862365	0.751537	0.454807	0.998971	1.4135	0.0143315	-0.327539	0.8853	33.7093	34.2862	7.3019	7.11886	46.2273	28.2596	35.8748	33.5004	51.5215	77.4792
proteinId307868	PCON_01869	SMAC_08744	0.923456	0.312932	-0.893497	0.466841	-1.55561	0.0547079	-0.463296	0.999874	-0.382395	0.998971	2.30096	0.00599928	-0.609642	0.841927	157.981	44.1085	175.419	32.0638	87.3889	137.962	95.8741	27.4963	55.3117	169.289
proteinId307878	PCON_03017	SMAC_01215	0.866468	0.143229	0.580399	0.479479	0.404176	0.493723	0.329326	0.999874	0.904642	0.668622	1.8093	0.00104653	-0.278258	0.905623	687.692	556.45	721.147	95.7241	112.846	100.804	175.51	112.287	171.393	343.175
proteinId307904	PCON_03158	SMAC_05675	1.05497	0.0797506	-1.41548	0.0399323	-1.92999	0.00229977	0.381325	0.999874	0.0962822	0.998971	-3.60713	1.0946e-08	1.14513	0.494199	115.843	22.7706	139.247	0.702318	4.35381	3.75007	3.66125	36.6974	18.0602	0.710784
proteinId307911	PCON_03143	SMAC_08723	-0.854198	0.361094	1.80814	0.0703541	-0.052396	0.954532	0.625892	0.999874	0.98523	0.9846	-3.7954	1.69261e-06	-1.01326	0.696472	6.69439	13.3756	1.96558	27.6696	56.665	40.6261	76.0792	51.4879	131.234	4.94662
proteinId307935	PCON_01861	SMAC_03526	-3.29178	NA	-0.140197	NA	-0.211135	NA	-1.03583	NA	-0.877474	NA	0.16311	NA	0.895283	NA	22.2142	10.7374	1.12121	12.5311	8.47414	20.2619	9.79666	220.09	141.359	73.9046
proteinId308000	PCON_14208	SMAC_00996	1.52862	0.075655	-0.757531	0.55188	-3.31318	1.36438e-05	-0.19242	0.999874	0.00245797	0.998971	0.244306	0.797583	1.27993	0.627185	17.1875	5.31751	29.5911	1.57924	18.0904	23.4547	21.5798	69.8192	34.0837	18.4279
proteinId308005	PCON_01970	SMAC_03529	-1.80893	0.000423211	-1.44511	0.0138506	-1.14955	0.0151825	-0.487051	0.999874	-0.399602	0.998971	-3.3724	5.26005e-10	0.353877	0.84651	110.313	21.2595	17.3391	37.2352	74.046	117.849	81.3688	9.41309	8.91787	0.4419
proteinId308016	PCON_07565	SMAC_08306	0.556693	0.441491	-0.641111	0.512475	-3.02649	4.73386e-07	0.917069	0.829025	0.604447	0.998971	-0.136446	0.858678	1.06983	0.58315	48.0198	16.2255	40.3394	1.94132	39.8801	23.3628	33.0261	95.2363	59.2211	28.9189
proteinId308035	PCON_03363	SMAC_08638	-0.344434	0.574827	-1.29907	0.0447661	-0.67445	0.21086	-1.20771	0.23404	-1.34532	0.115996	0.582366	0.312305	0.105152	0.973717	40.4245	8.67706	17.9367	9.89942	8.32167	22.0193	7.83858	17.7514	18.8921	15.3397
proteinId308036	PCON_01856	SMAC_03538	-3.48087	NA	-0.719566	NA	-2.63734	NA	0.490325	NA	0.342098	NA	-3.32078	NA	0.759709	NA	14.6554	4.69193	0.636122	4.16342	48.3592	38.2439	44.9119	51.9002	36.0106	1.51721
proteinId308062	PCON_01862	SMAC_03530	-2.99298	2.76546e-05	-0.182383	0.89359	1.56596	0.0111389	-0.113712	0.999874	-0.0211893	0.998971	-0.0221452	0.977491	0.488474	0.841038	21.1619	9.97811	1.36742	137.28	52.5423	64.2882	58.068	58.1223	48.9396	22.99
proteinId308078	PCON_03102	SMAC_03507	-1.22376	0.14086	-3.53522	4.63791e-05	-1.42899	0.0558712	-1.59417	0.334469	-0.00359019	0.998971	-10.2556	3.12451e-26	1.42527	0.51451	22.3483	0.914015	5.28349	8.50061	9.35818	33.4368	30.5801	670.333	287.936	0.0475534
proteinId308084	PCON_01532	SMAC_04819	-1.77529	0.0462821	0.197781	0.914647	-1.23327	0.14947	0.137702	0.999874	-0.796484	0.998971	2.33788	0.00602469	1.11571	0.680514	22.0261	13.7246	3.36668	1.95225	6.44083	6.56809	3.35111	15.7257	8.54074	21.2365
proteinId308149	PCON_11981	SMAC_00468	-1.45922	0.00611155	-0.0809214	0.942928	-0.318707	0.562206	-0.125668	0.999874	0.173057	0.998971	-2.01354	0.000489664	1.03761	0.494199	94.3231	47.9441	19.1904	30.3024	43.271	53.3603	55.3464	36.3705	20.711	2.37183
proteinId308254	PCON_10275	SMAC_04006	-1.42585	0.103666	-1.01979	0.377057	-3.66041	2.88836e-07	0.343353	0.999874	-0.0966965	0.998971	2.89161	0.000183689	0.869611	0.762972	2.41381	0.607635	0.465941	3.36584	74.5901	65.5414	56.0631	77.961	51.7168	188.78
proteinId308269	PCON_08972	SMAC_08763	2.24491	0.0835399	-2.5834	0.118757	-7.38553	2.01864e-09	-0.810654	0.999874	-3.09513	0.110076	3.05339	0.0132555	0.642603	0.900996	2.53308	0.126759	8.77617	0.0907021	18.9169	40.1016	3.24484	50.8932	39.3563	173.7
proteinId308287	PCON_10218	SMAC_04474	-3.42431	0.019606	-1.84457	0.275742	-3.70117	0.000867175	1.13188	0.999874	0.534953	0.998971	-4.40438	0.000101499	0.882064	0.830072	1.4448	0.155821	0	0.113799	6.25385	2.99667	4.10729	29.3151	19.3551	0.311941
proteinId308311	PCON_10269	SMAC_04005	-4.56458	4.99088e-06	-2.90865	0.000496187	-0.0920455	0.897866	0.684091	0.999874	0.107079	0.998971	0.176388	0.805668	-0.548474	0.809329	25.6515	1.5437	0.209848	81.7792	175.941	121.926	121.051	55.1908	94.401	55.918
proteinId308323	PCON_07224	SMAC_09192	0.722505	0.389625	-2.04019	0.0227988	2.0733	0.00340729	-3.12469	0.000372232	-2.51469	0.00999045	0.50548	0.550734	0.272403	0.940639	79.8613	9.6008	75.3802	655.838	19.8945	214.246	32.1436	47.0491	45.292	31.2221
proteinId308325	PCON_13731	SMAC_08177	2.94841	NA	1.89521	NA	-2.1772	NA	0.642835	NA	0.57329	NA	0.863267	NA	0.0702582	NA	2211.3	4568.15	10206.7	106.839	976.507	697.798	962.659	1346.28	1812.81	1715.54
proteinId308347	PCON_06146	SMAC_09140	-1.55526	0.00218301	0.45428	0.545216	0.735294	0.117745	-0.355902	0.999874	-0.424811	0.998971	1.40476	0.00342385	0.222624	0.913679	22.2092	16.3972	4.17335	186.936	107.043	155.029	105.52	85.6418	88.6139	118.997
proteinId308351	PCON_09268	SMAC_05319	-2.97919	0.000229541	-0.302254	0.83382	-0.419739	0.593498	-0.114221	0.999874	-0.22294	0.998971	-2.0424	0.00486583	0.143743	0.972532	6.35495	2.7289	0.397341	26.3642	41.2596	50.4557	39.435	34.0391	37.5735	4.07623
proteinId308382	PCON_09099	SMAC_07345	0.0579189	0.885862	-1.09912	0.00353754	0.705617	0.0226994	-0.648137	0.379082	-0.899383	0.0599709	-0.281337	0.438034	0.108803	0.947946	60.2514	15.0156	35.5742	31.4171	15.2114	26.9949	13.1918	31.7853	35.21	14.6902
proteinId308399	PCON_10022	SMAC_02542	-0.69567	0.228872	-0.67014	0.373469	-1.19606	0.0159326	0.816155	0.709229	0.244088	0.998971	-0.139612	0.820544	-0.222124	0.923113	17.3509	5.81446	5.93459	24.4299	125.929	79.6191	86.9879	13.2516	20.1189	8.82025
proteinId308403	PCON_12367	SMAC_06214	-3.10261	0.000609616	2.68928	0.00485472	-0.145471	0.882509	-0.0474975	0.999874	0.0540382	0.998971	0.224662	0.818975	0.396478	0.913354	24.3047	93.1169	1.36159	52.1634	69.3703	81.182	77.3606	106.886	115.418	68.9609
proteinId308428	PCON_06180	SMAC_03354	1.76162	0.0458256	-0.706255	0.602328	-3.99655	2.69776e-07	-0.0471309	0.999874	-0.121483	0.998971	-5.63935	2.60486e-11	0.233123	0.959679	16.5117	5.28704	33.8221	1.2835	27.5952	32.1465	26.9958	38.1723	39.3761	0.280561
proteinId308437	PCON_03724	SMAC_00040	-5.13703	1.36579e-23	2.41753	3.75699e-06	0.795326	0.115819	-0.197678	0.999874	2.31066	4.20862e-05	-2.17108	2.15704e-05	0.343418	0.84651	138.382	412.575	2.11403	9.55444	5.85577	7.60211	35.6055	22.3608	21.3337	2.23848
proteinId308477	PCON_03907	SMAC_03027	-0.374789	0.686309	1.54382	0.125078	-2.77942	0.000413213	-0.335646	0.999874	-0.421782	0.998971	-0.642933	0.46149	0.438527	0.892153	58.5636	96.3232	25.4258	1.65103	12.6115	18.1615	12.2769	159.009	147.427	41.38
proteinId308518	PCON_07076	SMAC_04737	0.268985	0.830413	0.0515449	0.984406	-1.64676	0.118368	-1.21535	0.999874	1.05276	0.998971	-0.850037	0.468256	0.978056	0.79987	18.244	10.2141	12.7007	3.45991	5.72921	16.2437	32.7437	21.6482	13.0918	2.99394
proteinId308545	PCON_09142	SMAC_00605	-1.67778	0.036	0.731472	0.535315	-1.46074	0.0496649	0.0276952	0.999874	0.319551	0.998971	0.882025	0.285641	-0.691116	0.807401	301.792	273.448	50.7204	41.4035	149.444	165.333	191.05	31.5551	64.6045	72.0887
proteinId308558	PCON_14170	SMAC_04786	-4.15554	1.10575e-14	-0.166665	0.874053	-2.60022	4.28477e-08	0.184273	0.999874	0.132947	0.998971	0.686945	0.209188	-0.732302	0.664029	111.121	53.0936	3.28316	10.0514	87.6645	86.7091	87.4757	30.1671	60.2235	55.0952
proteinId308589	PCON_09028	SMAC_03402	-1.7523	NA	-0.162818	NA	-0.0956017	NA	-0.770528	NA	-0.44383	NA	-4.96104	NA	0.74059	NA	3.45289	1.64792	0.557857	27.8727	21.7114	42.2843	28.1841	102.618	71	1.04063
proteinId308614	PCON_01025	SMAC_04962	-2.71088	0.000954297	0.147953	0.932496	0.216762	0.912974	0.436287	0.999874	0.174599	0.998971	-1.54269	0.0573473	0.239922	0.955013	63.1533	37.8851	5.14364	0	0	0	0	132.543	142.938	21.7547
proteinId308620	PCON_05660	SMAC_03481	0.993927	0.203317	-2.73246	0.0013829	-5.25658	4.05928e-11	1.00082	0.850213	1.26482	0.531492	-2.1076	0.00406555	0.113044	0.97968	20.3545	1.51157	24.0993	0.285716	33.4785	18.4231	41.9474	34.5831	38.9939	4.0418
proteinId308664	PCON_13308	SMAC_06190	0.353104	0.549604	-1.45063	0.0170599	-0.0877507	0.883985	0.000514515	0.999874	1.00897	0.377843	-3.72593	2.74403e-05	1.0783	0.503812	145.256	28.0114	106.138	79.8975	106.033	119.808	223.589	7.83198	4.0097	0.0914033
proteinId308693	PCON_11363	SMAC_03645	-3.62502	4.06033e-09	-0.121858	0.927438	-3.10264	2.68962e-08	-1.91228	0.0220392	-2.04694	0.00974397	-0.58385	0.383906	0.746358	0.721488	83.1127	40.9435	3.56319	14.7178	42.3533	186.769	39.7817	94.8197	67.8452	21.3167
proteinId308723	PCON_10047	SMAC_06741	1.14237	0.0653969	-0.161824	0.89442	-2.46616	6.51129e-06	-0.303124	0.999874	-0.243183	0.998971	1.63939	0.00586255	-0.250925	0.923113	89.1881	43.0667	114.753	12.2237	70.3407	98.3056	76.0643	30.2409	50.3264	83.393
proteinId308748	PCON_06800	SMAC_04410	1.36128	0.00739188	0.639463	0.361306	-0.0989317	0.86607	0.0515964	0.999874	0.188399	0.998971	1.11311	0.0357194	-0.115237	0.970641	95.3856	81.1685	143.019	18.3395	25.1505	27.3527	28.7022	6.65809	8.26942	9.99371
proteinId308773	PCON_10078	SMAC_08108	-4.71177	2.42135e-07	1.90587	0.0830266	-0.846222	0.374451	-0.716368	0.999874	0.311352	0.998971	-1.88293	0.0408188	0.684266	0.832794	106.463	229.917	1.8527	4.98625	6.72392	12.9043	14.8989	57.5491	44.3473	6.56038
proteinId308774	PCON_12491	SMAC_08364	-3.30785	5.25055e-07	0.664444	0.422989	2.09737	4.64721e-05	1.07048	0.431258	0.892586	0.707889	-0.120077	0.857509	0.223437	0.93008	18.7388	16.0707	0.917537	174.564	106.43	56.2258	97.2075	171.068	185.242	93.062
proteinId308781	PCON_10542	SMAC_07154	2.1726	0.0409037	-0.933146	0.568763	3.44054	0.00022593	-3.33885	0.0106153	-4.61082	4.62753e-05	-6.49072	1.84094e-10	0.986723	0.785783	5.15212	1.30945	14.9896	1272.11	11.2461	153.022	4.4716	138.189	82.5321	0.257576
proteinId308786	PCON_10323	SMAC_09193	-1.89952	0.0148014	-2.36819	0.00612227	0.499453	0.540214	-1.34855	0.525778	-2.00881	0.0784549	3.68865	6.09239e-07	-1.95777	0.218047	300.324	28.6339	42.5856	354.069	117.466	350.207	75.6483	29.2264	121.199	957.084
proteinId308794	PCON_10103	SMAC_00141	-3.69712	0.000518886	0.313212	0.886212	-2.44627	0.0159498	0.901369	0.999874	0.879734	0.998971	0.657134	0.578411	-0.223025	0.971541	457.508	315.171	16.2481	4.5604	68.3039	39.1127	69.5155	44.3531	65.6248	48.6355
proteinId308798	PCON_10321	SMAC_07977	-3.43547	1.16911e-10	-0.755486	0.189842	1.48372	9.62356e-05	0.31585	0.999874	0.0844995	0.998971	0.86391	0.0437937	0.365788	0.810127	39.7291	12.4985	1.88747	282.09	155.497	140.373	136.858	61.6165	58.2043	52.659
proteinId308803	PCON_09332	SMAC_04491	-2.70273	1.27871e-06	0.326516	0.706821	2.16353	1.07601e-06	0.00917047	0.999874	-0.214681	0.998971	1.17326	0.0182801	-0.232295	0.913354	6.48248	4.38928	0.52986	99.3262	27.3287	30.5869	24.1355	22.0917	30.416	34.6395
proteinId308807	PCON_09868	SMAC_03244	-1.94342	0.00107816	1.597	0.020065	-1.38398	0.0125144	0.105182	0.999874	0.324685	0.998971	-2.5417	1.13215e-05	0.0223029	0.994019	389.727	650.507	55.765	72.5877	256.091	268.331	310.129	190.276	247.735	22.0884
proteinId308808	PCON_10365	SMAC_05710	-1.65488	0.0709691	-1.28404	0.279507	0.264517	0.789964	-6.70064	3.59808e-14	-3.44556	0.000817058	4.91346	7.21226e-09	1.75155	0.494199	3116.83	660.458	530.186	800.746	5.89947	930.384	68.4076	268.327	101.337	2001.14
proteinId308817	PCON_05394	SMAC_01967	1.11203	0.125812	0.474572	0.680467	-0.888801	0.196419	-0.613049	0.999874	0.00204472	0.998971	1.50657	0.0305252	-0.238976	0.942902	81.7281	61.9788	103.727	28.4438	42.8065	74.9394	69.0175	38.3132	68.9859	98.8164
proteinId308868	PCON_04272	SMAC_03954	4.36038	1.16918e-20	0.13621	0.892237	1.28676	0.00440745	-0.302943	0.999874	-0.308192	0.998971	-1.35555	0.00548753	0.406992	0.813611	43.1246	25.3399	525.005	68.2231	27.7796	38.7611	28.6394	84.5952	74.8608	14.2324
proteinId308871	PCON_09344	SMAC_06649	0.781729	0.527804	-1.37454	0.497324	0.0195652	0.979849	-1.58047	0.26306	-0.573335	0.998971	2.45992	0.000385103	-0.106011	0.981071	1.08439	0	1.10129	13.3348	5.22919	18.4108	11.2416	53.1021	78.8686	209.059
proteinId308872	PCON_02839	SMAC_04696	-1.79991	0.0103688	0.293267	0.818605	2.46866	0.000111121	3.43431	4.18123e-06	1.54293	0.223406	0.38661	0.613468	0.112099	0.977818	25.2524	16.7754	3.94154	7.96407	19.863	1.90816	5.32145	6.93213	7.41321	4.71282
proteinId308912	PCON_01317	SMAC_02549	0.0788247	0.927729	3.35483	2.08917e-06	-1.20884	0.0591982	0.777672	0.991071	0.136724	0.998971	0.0895659	0.909361	0.734532	0.762724	3.9007	23.2902	2.32968	6.15759	31.4313	20.3359	20.5712	65.6366	48.2005	28.8762
proteinId308951	PCON_07576	SMAC_01280	-3.27582	3.83483e-13	-2.0057	1.61159e-05	1.62958	2.39928e-05	-0.0831569	0.999874	1.72923	0.000408811	2.92863	5.90012e-13	0.263439	0.863065	40.6897	5.34208	2.31799	49.9236	18.6703	22.3201	68.877	45.8263	47.6467	198.62
proteinId308958	PCON_12576	SMAC_06786	-1.46034	0.00368128	-1.16805	0.0468158	-1.36047	0.00241962	1.04096	0.268941	0.15983	0.998971	0.113937	0.840884	-0.224361	0.913354	22.2115	5.23928	4.48511	9.21384	61.889	33.5373	34.4376	26.9467	35.786	20.3494
proteinId308959	PCON_13815	SMAC_08573	-0.59238	0.443723	0.254657	0.854021	2.8469	5.31794e-06	-0.65642	0.999874	-0.760385	0.998971	2.8857	2.15539e-05	0.104985	0.980891	33.7733	21.7886	12.4432	911.831	94.724	170.716	91.0677	16.2393	19.4941	84.6995
proteinId309011	PCON_13830	SMAC_03967	-1.49206	0.000419962	0.850295	0.100593	-1.9291	4.08793e-07	1.2039	0.0407569	0.925124	0.224762	0.757117	0.0775141	0.555386	0.675837	126.997	122.74	25.1322	11.7537	129.537	62.8045	110.243	126.67	103.586	95.0254
proteinId309012	PCON_13840	SMAC_02630	2.16431	0.0316828	-0.656055	0.692291	0.233433	0.837446	-0.237915	0.999874	-0.599685	0.998971	-5.88826	6.65558e-10	0.291369	0.956547	39.2231	12.8571	110.641	49.2373	43.3572	58.2411	34.2416	140.42	143.991	0.762169
proteinId309030	PCON_01172	SMAC_04662	-3.59778	1.98187e-10	0.460826	0.590896	0.0865134	0.889659	0.0989392	0.999874	0.0231406	0.998971	2.85127	5.6333e-08	0.22921	0.923113	29.2711	21.7178	1.27613	123.429	155.002	162.954	151.877	23.7834	24.8669	103.454
proteinId309043	PCON_14075	SMAC_12604	-0.392888	0.510558	-0.961533	0.158273	1.25445	0.0109036	-1.06011	0.359165	-1.54341	0.0326192	1.79758	0.00061649	-0.111621	0.971541	70.6111	19.2293	30.4818	205.529	49.9736	119.151	36.746	14.1872	19.7628	35.5485
proteinId309050	PCON_01564	SMAC_05293	-3.36195	6.18961e-07	-0.832037	0.376797	-3.60357	1.78465e-09	-0.0714081	0.999874	-0.315747	0.998971	-5.23363	3.1269e-15	0.709837	0.762972	42.499	12.5169	2.13092	6.47389	98.7779	117.171	85.7289	87.2242	65.336	0.733781
proteinId309074	PCON_14048	SMAC_02483	-0.275585	0.612745	-0.51212	0.459819	-3.35202	5.83295e-11	0.0801473	0.999874	-0.137737	0.998971	-2.68774	0.0342991	-0.00318612	0.998035	126.878	47.6434	59.2496	1.4311	19.4518	20.717	17.2858	1.62643	3.13135	0
proteinId309077	PCON_11852	SMAC_02178	-1.34018	0.035462	-0.057016	0.969692	-0.993588	0.092127	0.163303	0.999874	-0.403847	0.998971	0.439531	0.513089	-0.899847	0.641507	34.9968	18.0894	7.7088	35.551	100.365	100.75	69.3675	10.6612	26.9254	17.0636
proteinId309084	PCON_14067	SMAC_02471	-2.21052	0.036039	-2.07617	0.0947185	-2.58295	0.00367773	0.225431	0.999874	0.149027	0.998971	0.0883687	0.938145	1.00459	0.762972	3.30253	0.347798	0.310886	4.7807	47.1205	44.8962	46.0359	86.557	49.9094	24.6724
proteinId309106	PCON_14070	SMAC_08281	-4.61318	5.97695e-14	0.294624	0.707128	1.45363	0.000364996	-0.165346	0.999874	-0.344527	0.998971	-1.44079	0.00112793	0.476921	0.762972	46.4664	30.651	0.875468	317.726	128.658	162.866	117.508	215.654	176.541	35.4257
proteinId309128	PCON_11862	SMAC_03754	-2.28131	0.00147797	0.366276	0.778827	1.16409	0.0913489	-1.04519	0.777718	-0.0299111	0.998971	-0.765409	0.314031	0.842004	0.729988	232.514	160.911	25.4823	172.39	44.2889	105.992	95.0542	162.702	113.904	37.2305
proteinId309131	PCON_01185	SMAC_00722	-2.23006	4.66109e-07	0.144713	0.871587	-0.979674	0.0201489	-0.232258	0.999874	-0.64228	0.809042	-4.24636	1.45122e-18	-0.422843	0.795517	112.683	66.7758	13.3325	15.3215	31.9893	42.4482	24.8518	17.6832	27.07	0.754351
proteinId309136	PCON_01520	SMAC_06545	-2.49855	0.000191015	2.02547	0.00662258	2.78588	2.57029e-06	0.954631	0.791584	-0.017686	0.998971	1.56285	0.0182278	0.211547	0.950145	37.6531	87.5115	3.62544	363.383	124.071	70.9405	64.1688	41.7825	44.192	64.0603
proteinId309151	PCON_14053	SMAC_00971	2.8124	0.000186078	0.225876	0.885051	2.57986	0.000194627	0.568639	0.999874	0.803324	0.998971	0.84924	0.296158	0.186854	0.965685	771.674	489.779	3314.78	1169.98	352.52	264.134	432.398	21.1873	23.8432	19.6013
proteinId309201	PCON_03574	SMAC_07049	-1.53016	0.0249386	-0.748825	0.424323	0.429363	0.527617	-0.0146689	0.999874	-0.00511885	0.998971	2.11343	0.00079469	0.0828241	0.985374	8.83546	2.78419	1.69055	110.231	101.309	115.332	105.608	20.5961	25.4568	62.3468
proteinId309205	PCON_03564	SMAC_07050	-3.90971	4.01489e-17	1.74809	0.000108911	-5.29034	6.61918e-39	-0.456364	0.999874	-0.222636	0.998971	-6.61185	6.34498e-29	0.495678	0.732514	32.457	59.1631	1.15265	1.04911	36.6092	56.8397	44.591	33.3453	29.5667	0.125269
proteinId309207	PCON_04542	SMAC_01269	1.05761	0.0966216	-0.473079	0.636635	0.839752	0.157462	-0.314384	0.999874	0.0288909	0.998971	0.414165	0.527152	1.25386	0.42573	40.7123	15.4857	48.6536	33.0313	17.9478	25.3466	23.6838	337.76	203.169	124.395
proteinId309220	PCON_04541	SMAC_03924	-0.640569	NA	2.74214	NA	0.156212	NA	0.556182	NA	0.202963	NA	-0.489667	NA	0.208526	NA	1317.61	5008.66	471.109	905.157	1504.39	1138.43	1209.23	744.348	884.491	331.659
proteinId309243	PCON_03569	SMAC_09515	-2.28348	0.00191306	-0.780309	0.417	1.33484	0.0268607	-1.07899	0.593605	-0.956669	0.774809	0.936281	0.158799	0.734472	0.742398	8.42267	2.55036	0.854273	49.1225	11.0237	26.8179	12.4276	66.1453	45.9796	43.9605
proteinId309250	PCON_04416	SMAC_02266	-7.05387	2.54779e-14	-0.409221	0.719388	-1.23746	0.0475829	1.17311	0.501876	0.303404	0.998971	-4.50883	5.08287e-09	0.104995	0.97908	29.6862	11.8872	0.0639938	14.8884	103.785	50.7073	57.736	5.78331	6.79027	0.109684
proteinId309263	PCON_10002	SMAC_00115	-1.06189	0.0174201	-0.617685	0.297619	-0.0339307	0.946037	-0.556409	0.926528	-0.992772	0.189105	2.72304	7.70222e-11	0.544814	0.696472	205.115	70.7582	54.9115	233.657	201.736	335.928	153.573	112.695	87.8492	321.946
proteinId309268	PCON_04505	SMAC_01919	-1.40639	0.0423782	0.289981	0.819406	-1.71776	0.00586563	-0.317431	0.999874	-0.29123	0.998971	-2.01404	0.00243227	-0.895635	0.670482	189.324	124.214	38.9985	82.8694	279.589	395.433	294.676	160.622	356.768	49.7304
proteinId309303	PCON_11284	SMAC_06689	-5.90016	1.22258e-08	-0.651634	0.634694	-4.22421	3.33732e-08	0.474602	0.999874	0.444953	0.998971	-8.67325	8.24508e-18	0.907033	0.762972	45.302	15.0227	0.213953	1.76005	64.1549	51.2334	65.0071	130.105	76.4456	0.0403318
proteinId309381	PCON_01735	SMAC_04385	-0.47085	0.570888	1.48158	0.0979953	1.84697	0.00610464	-0.202206	0.999874	-0.132442	0.998971	0.161203	0.849912	-0.185904	0.963366	29.4055	45.703	11.9735	86.6417	25.1418	32.8241	27.404	17.6759	25.7841	16.5722
proteinId309404	PCON_10787	SMAC_00634	-3.78869	1.51702e-06	-0.0156043	0.995599	0.630704	0.431135	0.963381	0.942875	0.57848	0.998971	1.75457	0.0230942	0.298239	0.930874	28.6457	15.1917	1.00564	136.966	217.518	122.336	170.657	42.259	44.5078	89.4147
proteinId309413	PCON_11961	SMAC_09281	-1.30828	0.0132409	-0.393526	0.63883	-0.763555	0.129348	-0.14416	0.999874	1.52065	0.029146	-0.556537	0.315508	-0.698663	0.667657	113.162	45.6874	25.4271	59.197	115.126	144.082	386.109	16.4246	30.7362	10.947
proteinId309429	PCON_08597	SMAC_04575	0.447144	0.58664	-0.469806	0.703815	-2.24362	0.000791512	0.120679	0.999874	-0.0915966	0.998971	-2.16121	0.00285474	0.558541	0.830072	29.9972	11.4519	23.2235	3.90273	26.1682	27.0298	23.1998	23.5	19.8501	1.89598
proteinId309459	PCON_11768	SMAC_04329	-5.24557	9.58974e-16	-2.16256	0.000304483	-2.18529	6.35467e-06	0.472322	0.999874	-0.0455704	0.998971	-0.456591	0.433862	0.366064	0.84651	57.8482	6.7224	0.71105	55.4078	448.75	362.018	322.097	318.681	295.694	118.52
proteinId309473	PCON_07579	SMAC_01267	-2.0017	0.0133362	-0.559674	0.67094	0.222167	0.804657	-0.212043	0.999874	-0.506796	0.998971	-2.13032	0.00702639	-0.330494	0.923113	163.702	58.2616	21.6734	61.325	55.6501	73.0758	46.4938	195.697	312.5	38.7641
proteinId309502	PCON_06669	SMAC_08379	1.01451	0.321098	2.04313	0.072466	-0.14785	0.891259	-0.876158	0.999874	-0.694542	0.998971	-7.16526	9.25692e-15	1.42458	0.638121	15.8089	38.1035	18.7591	18.7414	13.41	28.9953	15.8747	599.078	262.903	0.568301
proteinId309504	PCON_02250	SMAC_07364	-0.0493171	0.939111	1.11189	0.0684126	3.53243	1.16658e-15	-1.61249	0.0164109	0.581235	0.998971	1.52981	0.00204856	0.757233	0.638121	26.1716	31.1789	14.4179	181.209	6.00725	21.2025	29.3026	64.508	49.4666	72.982
proteinId309532	PCON_05001	SMAC_03904	-2.49169	0.000519982	0.116461	0.939934	-0.92714	0.184482	-0.223455	0.999874	0.0494258	0.998971	1.87875	0.00761615	-0.388129	0.891666	124.941	72.8775	11.8067	68.9728	142.972	189.228	179.798	22.5361	38.2428	79.8958
proteinId309535	PCON_02707	SMAC_00836	-1.97448	5.05204e-07	-0.592311	0.243987	-2.93113	2.40737e-18	0.0644662	0.999874	0.00982925	0.998971	0.888328	0.0166535	-0.289447	0.829185	30.2229	10.6797	4.30629	5.30172	52.3308	56.4423	52.1651	38.4305	59.361	55.9598
proteinId309544	PCON_02709	SMAC_00251	-1.48576	0.0480246	-1.72188	0.046234	0.582039	0.404292	0.727495	0.999874	0.66091	0.998971	-3.88985	6.55383e-10	1.12369	0.551221	19.5324	2.96322	3.80292	12.4019	17.0064	11.3926	16.8269	358.272	227.795	6.65789
proteinId309594	PCON_02686	SMAC_04384	-0.808999	0.219618	1.05393	0.183357	-0.673261	0.276623	-0.0254101	0.999874	0.456818	0.998971	1.25317	0.0444336	-0.227564	0.936527	442.508	507.258	142.636	314.899	627.277	720.296	914.751	111.672	192.67	226.464
proteinId309636	PCON_05705	SMAC_05824	0.994003	0.222152	1.50941	0.108891	0.539317	0.502218	0.0306828	0.999874	0.194073	0.998971	-0.731733	0.369685	-0.493844	0.853434	425.311	678.066	495.617	142.081	122.191	134.74	142.277	50.2798	88.6224	30.6938
proteinId309650	PCON_05704	SMAC_04074	-1.78678	1.18624e-05	0.777202	0.12795	-1.5827	1.56948e-05	-0.316319	0.999874	-0.496924	0.975161	0.0745695	0.875816	0.430996	0.762972	61.2597	56.1176	9.83759	29.9642	89.7697	126.333	81.8322	53.4847	48.9452	26.8384
proteinId309667	PCON_13897	SMAC_07114	0.297502	0.624048	1.79315	0.00142276	-2.36399	8.63847e-08	0.0779358	0.999874	-0.324731	0.998971	-1.17109	0.0166535	0.138722	0.959307	30.4924	57.8268	21.2355	12.3056	84.2746	90.0011	65.9427	77.2331	80.2671	18.1195
proteinId309680	PCON_02532	SMAC_01219	0.261757	0.601016	0.501339	0.424323	0.730902	0.0838582	-0.447513	0.999874	-0.203123	0.998971	0.804117	0.0756963	0.100732	0.969182	60.5554	46.3411	41.4413	38.0527	20.7196	31.9947	25.5711	27.7256	33.2846	27.679
proteinId309732	PCON_02528	SMAC_04816	-4.93834	1.92931e-13	-0.744255	0.331898	-0.33171	0.572643	-0.055793	0.999874	-0.253245	0.998971	-2.64906	5.7769e-07	0.328639	0.870999	25.2251	8.03802	0.36668	19.7764	30.1624	35.341	27.0522	120.27	106.09	8.54543
proteinId309742	PCON_10177	SMAC_00607	-4.61656	9.91241e-09	-0.178377	0.915842	0.250275	0.776696	-0.650969	0.999874	-0.796497	0.998971	3.0841	4.93876e-05	-0.514542	0.850347	188.154	88.6277	3.44881	515.526	336.405	606.802	313.457	97.0386	181.378	956.285
proteinId309746	PCON_08682	SMAC_01638	-1.81642	6.20811e-05	-0.997389	0.0627253	-0.0285095	0.95309	-0.20033	0.999874	-0.509416	0.998971	0.166101	0.738179	-0.0719657	0.977549	6.62016	1.758	1.05207	83.7733	92.8414	120.293	77.1065	15.0149	19.3115	10.795
proteinId309749	PCON_01436	SMAC_05974	-4.1306	1.82184e-07	0.41574	0.63897	-5.01249	1.15333e-22	0.0467067	0.999874	-0.116411	0.998971	0.380972	0.50776	0.379213	0.841927	7.69059	5.54599	0.185052	0.766118	31.2694	34.0925	28.8154	39.9336	35.8724	23.4591
proteinId309848	PCON_07189	SMAC_02066	-4.6044	4.97525e-09	-1.77254	0.0139751	-0.79191	0.207979	-0.188876	0.999874	-0.624413	0.998971	-0.143473	0.851634	0.312943	0.907752	29.2552	4.51113	0.602789	4.23185	8.25966	10.6526	6.25183	5.57591	5.9063	2.80891
proteinId309851	PCON_09547	SMAC_05799	-2.77606	8.49599e-05	0.339367	0.791935	1.44951	0.0326322	-1.28002	0.5492	-1.08276	0.783462	-3.80571	1.17556e-07	-0.739903	0.762972	109.194	75.1841	8.47645	8.19389	1.43003	4.08354	1.6958	11.1674	22.2129	0.838066
proteinId309880	PCON_09531	SMAC_08527	-1.31988	NA	-2.27466	NA	-0.0795215	NA	-1.87221	NA	4.27273	NA	-2.10919	NA	0.558416	NA	134.014	11.8812	26.7312	6.60841	1.98148	9.97172	245.992	8.19592	5.98664	0.551601
proteinId309882	PCON_03440	SMAC_04744	0.449384	0.712603	0.343942	0.871587	-3.07512	0.00171917	-0.739093	0.999874	-0.714794	0.998971	-6.85816	1.41103e-09	0.50948	0.911684	427.388	295.388	337.541	47.0549	335.352	656.05	353.43	49.8256	42.7246	0.0299861
proteinId309900	PCON_09589	SMAC_00788	-3.66915	3.40716e-06	1.06664	0.333747	0.47689	0.582068	0.600607	0.999874	-0.17574	0.998971	-1.14757	0.170733	-0.126655	0.97908	702.636	821.49	27.9602	148.281	200.568	146.278	117.987	598.108	815.635	206.683
proteinId309927	PCON_01897	SMAC_05665	-5.42969	NA	-0.677879	NA	1.27327	NA	1.38893	NA	-0.39952	NA	-3.82495	NA	1.40791	NA	58.6031	17.9359	0.483962	21.2092	29.2051	11.4556	7.8024	27.7935	12.8363	0.318028
proteinId309967	PCON_02898	SMAC_01551	-3.66694	0.000461173	0.6627	0.713017	4.57468	1.46633e-06	0.971718	0.999874	3.21383	0.0206057	-2.1077	0.049135	0.572719	0.892749	611.438	530.546	21.3939	3719.93	337.592	183.462	1864.81	65.03	52.9111	4.5788
proteinId309971	PCON_07560	SMAC_06336	-1.80099	NA	-0.490983	NA	0.240795	NA	-1.59449	NA	-2.2815	NA	-3.14553	NA	0.629342	NA	17.3609	6.4391	2.60626	46.7821	15.5781	56.1249	9.76164	31.8877	24.9838	1.12467
proteinId309978	PCON_12097	SMAC_02233	-2.12171	0.00355115	2.09046	0.0107209	3.48444	5.64186e-08	-0.673896	0.999874	-0.445309	0.998971	-2.32027	0.0011167	-0.0627286	0.991121	128.217	312.752	16.2488	820.087	53.1455	97.0814	64.7044	71.0295	85.9465	7.96409
proteinId310012	PCON_04103	SMAC_00819	2.81354	1.11698e-05	-4.25521	2.52875e-07	-2.02773	0.000642553	0.365854	0.999874	-1.47827	0.185915	2.86358	4.84519e-06	1.26798	0.494199	9.6311	0.206519	40.7705	10.4025	71.7351	62.3408	19.9595	58.4439	28.9454	105.875
proteinId310035	PCON_12003	SMAC_02615	0.675219	0.214026	-0.753799	0.274412	0.0795556	0.889659	0.270819	0.999874	0.0632962	0.998971	-0.269399	0.630394	0.0425326	0.991865	21.3293	6.70942	19.4815	20.7279	29.6175	27.5873	26.4771	36.6146	38.4705	17.8684
proteinId310081	PCON_11481	SMAC_08476	-4.09706	2.65989e-08	2.21866	0.00968077	-1.04203	0.160517	0.0487134	0.999874	0.63984	0.998971	-2.56117	0.000532096	0.552648	0.841038	599.289	1589.04	17.7629	31.0538	82.9187	90.403	131.289	907.232	785.454	70.6203
proteinId310107	PCON_11482	SMAC_05955	-5.35838	1.71496e-11	0.236244	0.857568	1.92025	0.00146837	0.290947	0.999874	0.583339	0.998971	-5.81047	1.95052e-15	-0.658416	0.776923	76.4075	48.1141	0.787736	350.458	140.973	129.186	179.595	47.5443	88.2319	0.709651
proteinId310128	PCON_12002	SMAC_12720	-0.422582	0.611826	-0.0737635	0.969184	0.0606087	0.942301	-0.0521016	0.999874	-0.0861208	0.998971	1.49603	0.0445192	0.00541993	0.997326	445.114	227.883	187.063	175.892	201.052	235.388	203.342	26.8236	40.4449	58.8536
proteinId310131	PCON_06557	SMAC_06122	-2.59	0.00246871	-0.544007	0.706173	-2.1708	0.00685255	2.12782	0.112478	0.560582	0.998971	0.695806	0.448067	-0.146298	0.976111	111.421	40.09	9.58674	4.37036	120.559	28.8283	40.0053	34.3276	48.1338	46.3382
proteinId310161	PCON_06404	SMAC_05385	-2.39986	0.00732368	-1.18312	0.292251	-0.890498	0.265924	0.310904	0.999874	-0.375404	0.998971	-0.828276	0.325887	0.1092	0.982337	5.82848	1.30671	0.518933	29.391	87.3661	78.7015	55.0986	52.7174	59.5889	18.8255
proteinId310188	PCON_07488	SMAC_00289	-2.15234	0.00317224	-0.195917	0.893101	1.96202	0.0028697	1.18505	0.606378	0.182226	0.998971	2.42438	0.00054824	-0.714104	0.775653	38.2898	18.0122	4.58201	321.011	232.409	111.953	117.3	15.5782	32.2717	104.563
proteinId310197	PCON_05195	SMAC_01242	-3.06468	0.00166432	-1.31673	0.187005	0.279662	0.701475	-0.218717	0.999874	-0.325972	0.998971	-1.23028	0.066872	-0.169163	0.963184	10.6843	2.10509	0.374728	51.8155	46.2779	60.9653	44.3036	31.6749	45.2058	8.68404
proteinId310211	PCON_10781	SMAC_00177	-0.434431	0.715596	-2.15113	0.0907119	-1.43632	0.15914	-0.0761731	0.999874	-0.132032	0.998971	-3.06494	0.0036822	-0.102751	0.989753	17.6963	1.86152	7.18138	39.2211	136.886	163.277	135.912	4.43926	6.3376	0.252282
proteinId310240	PCON_11161	SMAC_06192	-0.506933	0.266145	0.377244	0.558739	1.22486	0.00134597	0.194569	0.999874	-0.159635	0.998971	1.43744	0.000528853	-0.427157	0.775337	129.768	91.1558	51.5758	313.036	189.515	186.283	153.228	15.8267	26.0155	37.6113
proteinId310290	PCON_11558	SMAC_06314	-2.46331	NA	0.188278	NA	-2.31032	NA	0.152322	NA	1.72608	NA	0.501878	NA	1.1366	NA	26.0916	16.0801	2.41058	3.47493	26.1811	26.362	85.7884	45.9559	25.9989	20.9787
proteinId310292	PCON_11556	SMAC_06134	-0.623462	0.378395	-0.476353	0.651348	-1.39685	0.0217974	0.0525671	0.999874	1.84663	0.035653	2.69256	1.60453e-05	0.434285	0.847393	31.153	11.8936	11.4583	10.1535	34.9245	37.911	130.176	29.9854	26.0016	86.1496
proteinId310347	PCON_08155	SMAC_00078	-2.73584	1.9989e-05	-1.68223	0.0262114	0.663549	0.313675	-0.200725	0.999874	0.294534	0.998971	-1.59538	0.0140391	0.0153783	0.995399	307.957	49.0453	24.7343	211.378	144.289	187.688	212.545	125.119	175.551	28.4923
proteinId310449	PCON_02595	SMAC_07678	-7.82461	4.7417e-13	-3.27393	0.00196861	3.37183	0.000106133	0.44401	0.999874	1.72642	0.48228	-0.0845755	0.941229	0.617821	0.853434	140.648	6.40192	0.132806	215.424	32.5636	26.4704	86.7976	39.225	30.6054	13.6263
proteinId310450	PCON_05065	SMAC_04777	-3.24852	0.00012824	-0.354454	0.783879	-0.121451	0.876378	-0.787794	0.992947	0.719292	0.998971	-2.4161	0.000413379	-0.596581	0.809329	6.15208	2.57729	0.28771	23.2672	18.1025	35.777	54.9264	9.09644	15.0638	1.57623
proteinId310460	PCON_09600	SMAC_05437	-5.96121	4.05287e-16	0.0458644	0.963134	3.16984	7.43084e-22	0.605413	0.663196	-0.332594	0.998971	3.09632	1.68055e-17	-0.480381	0.696472	46.5337	25.7177	0.271846	1148.15	241.534	178.226	129.722	22.2816	40.9143	179.313
proteinId310494	PCON_04112	SMAC_01370	-0.739746	0.232689	1.28951	0.0624667	-2.67915	2.24359e-07	0.0986966	0.999874	0.311371	0.998971	-1.82221	0.00143149	0.196559	0.942902	83.6075	110.722	27.9378	15.5513	137.412	144.686	165.202	71.5413	69.4017	9.90583
proteinId310511	PCON_05312	SMAC_03898	0.248535	0.702277	-1.02562	0.15722	2.5609	2.62958e-07	0.582274	0.999874	0.151251	0.998971	-1.56774	0.00675738	1.62787	0.121803	32.8891	8.57685	22.4706	106.114	33.1122	24.7595	25.261	49.5891	22.3549	3.29761
proteinId310548	PCON_04113	SMAC_01306	-2.89884	4.32166e-07	-0.129487	0.915026	-2.64663	2.82688e-07	0.697856	0.951059	0.298204	0.998971	1.41838	0.0112682	-0.207954	0.935952	14.7084	7.24289	1.07585	1.53319	19.8225	13.6106	15.438	21.0258	30.652	40.2356
proteinId310562	PCON_11697	SMAC_02673	-5.85697	3.76075e-06	-0.396756	0.814687	-2.25251	0.00677927	0.124742	0.999874	-0.250184	0.998971	-2.82289	0.00241061	-0.169578	0.975216	11.4129	4.5594	0	3.21693	22.7349	23.4278	17.8778	8.75579	13.0273	0.681565
proteinId310604	PCON_01936	SMAC_06496	-1.26788	0.192433	-1.21191	0.331898	-2.08164	0.0143583	0.286937	0.999874	-0.522317	0.998971	1.43968	0.123798	-0.290641	0.950145	12.6283	2.76149	2.81356	15.1782	106.26	97.0176	60.6176	16.4067	25.5443	33.0188
proteinId310631	PCON_09767	SMAC_02631	-2.53726	1.14507e-05	0.0388411	0.976566	0.599692	0.296649	0.0416831	0.999874	-0.49531	0.998971	-0.809687	0.170804	0.614888	0.762972	29.8636	16.4922	2.77216	94.8512	79.3723	86.7686	56.141	102.238	77.2304	21.5009
proteinId310673	PCON_04663	SMAC_06179	-0.583006	0.336124	0.472115	0.588921	0.206216	0.739625	-0.308097	0.999874	-0.295174	0.998971	0.250487	0.693835	-0.72465	0.682444	464.27	350.417	174.24	210.126	181.431	254.176	189.476	53.3448	109.254	73.4788
proteinId310698	PCON_09120	SMAC_01568	-1.75782	NA	-2.21716	NA	-1.13965	NA	-0.428109	NA	-1.04003	NA	0.708842	NA	0.438833	NA	59.6606	6.56014	9.60765	250.505	519.456	793.402	347.602	195.62	185.542	169.219
proteinId310701	PCON_01283	SMAC_04800	-0.688715	0.466135	1.55318	0.151474	-3.37338	1.31163e-05	-0.349889	0.999874	0.0181678	0.998971	-0.593385	0.526145	2.17408	0.218047	317.022	527.03	108.176	17.783	193.522	281.614	261.931	1240.63	338.819	124.223
proteinId310705	PCON_11775	SMAC_02527	-0.448186	0.320552	-1.78977	8.49511e-05	1.58175	1.1848e-05	0.150597	0.999874	-0.283579	0.998971	1.53096	0.00011893	0.65901	0.587871	18.1668	2.77426	7.48298	67.9845	31.072	31.5246	23.7391	13.4812	11.2848	16.871
proteinId310707	PCON_03215	SMAC_05363	0.0154832	0.990563	-2.1522	0.0678528	0.136352	0.902132	-0.144399	0.999874	-0.755609	0.998971	-0.356121	0.747226	-0.11748	0.985991	11.0242	1.17382	6.17681	8.88283	9.04037	11.3338	5.93288	10.1594	13.8081	4.84026
proteinId310712	PCON_08595	SMAC_04362	-1.30663	0.0442507	1.55929	0.0305423	0.470421	0.467415	-0.642262	0.999874	-0.52017	0.998971	0.22099	0.755655	0.121558	0.972532	32.1571	51.9994	7.11927	24.5312	13.7944	24.6231	15.5499	23.667	28.1146	17.5723
proteinId310717	PCON_03203	SMAC_07088	-1.37805	0.0361284	-0.0801066	0.959099	-1.41501	0.0183573	1.1095	0.540046	0.387406	0.998971	4.70718	9.4885e-15	0.418432	0.852182	117.351	59.6302	24.7865	38.98	286.377	146.298	176.847	141.046	133.257	2100.59
proteinId310719	PCON_03237	SMAC_01956	-4.57197	NA	0.100836	NA	2.39353	NA	-0.276311	NA	-0.262982	NA	2.17094	NA	0.410007	NA	19.1309	11.039	0.356491	353.514	67.6737	92.6375	70.7235	25.6945	21.4355	52.0883
proteinId310760	PCON_03241	SMAC_00731	-5.90731	2.45272e-09	-0.570131	0.750597	-2.10375	0.0270851	0.938219	0.999874	1.54634	0.726283	-3.63558	0.000210755	-1.4794	0.638121	150.219	51.214	0.976047	11.8517	140.04	78.6906	227.237	38.2333	135.412	5.33581
proteinId310769	PCON_08875	SMAC_02283	-0.46257	0.669537	-5.2577	0.000535917	0.17737	0.865526	-4.65507	6.10788e-05	-6.4107	6.19486e-07	-6.89937	9.48972e-09	-0.16405	0.975216	3.86143	0	1.54396	5.54491	0.184204	7.05619	0.0257884	8.70987	11.37	0.0200242
proteinId310792	PCON_06039	SMAC_02348	-1.5031	0.0212834	-1.17971	0.141648	-4.22802	6.08359e-14	-0.331388	0.999874	-0.984124	0.702848	0.861249	0.186791	-0.214156	0.942902	18.999	4.34429	3.70331	2.92091	56.9259	81.2226	36.9548	49.32	64.0021	66.023
proteinId310864	PCON_06064	SMAC_02310	-1.98444	4.68796e-05	2.27497	5.37013e-06	-0.699933	0.137626	-0.527341	0.999874	-0.823584	0.55954	-0.223025	0.67915	0.121732	0.963366	111.135	294.865	15.598	29.6673	40.9369	67.0442	34.3852	157.418	178.339	75.39
proteinId310912	PCON_13467	SMAC_02495	0.989867	0.0578817	-1.29125	0.0307172	0.551058	0.275892	-0.661832	0.895409	-0.967641	0.381978	-0.196753	0.734089	0.657072	0.680253	49.7696	10.7049	56.8538	337.946	181.181	325.084	151.295	71.1952	51.5123	23.0313
proteinId311060	PCON_06413	SMAC_06184	-0.581821	NA	0.791823	NA	1.70674	NA	0.413432	NA	0.276629	NA	0.0172808	NA	0.462745	NA	48.424	45.383	18.3013	253.233	128.281	108.122	120.686	21.4045	17.447	9.13483
proteinId311062	PCON_13515	SMAC_07895	-6.52618	7.27127e-11	-1.03363	0.300201	-3.71829	1.24049e-08	1.50044	0.317093	0.159255	0.998971	-0.780552	0.311665	0.693982	0.788469	26.1214	6.65568	0.0513487	5.5214	284.839	109.451	112.668	177.47	132.319	35.079
proteinId311093	PCON_10046	SMAC_02504	1.12458	NA	2.70235	NA	-0.287002	NA	0.513046	NA	0.186019	NA	-2.96007	NA	0.00313891	NA	306.232	1165.33	391.514	52.3592	115.038	89.4595	93.9393	393.665	499.32	33.9452
proteinId311107	PCON_05352	SMAC_03353	0.820271	0.138045	1.21043	0.0525332	1.56089	0.00109852	-0.490311	0.999874	-0.537043	0.998971	-1.972	0.000117214	1.065	0.465336	101.769	127.846	102.526	233.896	67.6366	107.837	67.7193	260.607	143.056	17.8246
proteinId311233	PCON_10603	SMAC_00959	-0.94249	0.100957	0.457061	0.550138	2.86048	9.95665e-13	0.257545	0.999874	-0.00808601	0.998971	-2.34267	0.0293741	-0.422192	0.862559	17.4439	12.9334	5.00588	171.597	34.9815	32.8747	30.125	1.4331	1.63316	0.113357
proteinId311300	PCON_04379	SMAC_02927	-3.91136	2.73258e-05	0.365353	0.839516	0.650336	0.51059	-1.54221	0.608729	-1.62758	0.527315	-1.94944	0.0385805	1.76104	0.503812	81.0996	56.5091	2.47004	191.113	48.8216	171.604	47.4107	283.855	98.6223	13.8721
proteinId311365	PCON_04713	SMAC_04770	0.557323	0.361491	-0.160279	0.887669	-3.17786	1.83763e-10	0.21887	0.999874	0.0791567	0.998971	-0.359558	0.556497	0.055215	0.989753	4.96773	2.36823	4.12294	1.75863	23.72	22.8716	22.1952	21.0288	23.2157	9.16759
proteinId311391	PCON_08498	SMAC_00666	-2.05516	0.0266147	0.145826	0.938688	-2.68156	0.00106785	-0.264378	0.999874	-0.316883	0.998971	-0.368768	0.709416	0.77101	0.8059	14.5116	8.68094	1.84341	1.79402	12.9092	17.6474	12.8709	18.9796	13.1751	4.6143
proteinId311429	PCON_08503	SMAC_03814	0.0228279	0.988714	-2.55898	0.0702783	-0.0896812	0.942301	-1.79964	0.601377	-2.47207	0.18564	-0.633462	0.59574	0.781644	0.841038	1.58827	0.0958759	0.914559	5.30802	1.81995	8.01169	1.12794	85.2974	61.5381	16.8558
proteinId311449	PCON_08710	SMAC_07448	-5.09653	1.58227e-15	-1.22881	0.0510814	-0.498544	0.35025	0.00726542	0.999874	-0.328329	0.998971	-4.86145	6.7016e-20	0.346483	0.848841	18.714	4.23531	0.265031	13.7174	24.4529	27.3825	19.9392	34.7659	31.9202	0.512992
proteinId311453	PCON_12743	SMAC_06303	-1.53675	0.0807597	1.15501	0.310533	-3.74231	9.86064e-07	0.243392	0.999874	0.252656	0.998971	-1.07299	0.22268	0.647692	0.830072	34.261	42.6311	6.34034	2.54356	55.8554	52.7704	58.1435	104.886	78.9512	16.6859
proteinId311460	PCON_02950	SMAC_08420	-1.60566	0.00958609	-0.00492731	0.997209	-2.44287	7.92786e-06	-0.258466	0.999874	0.190966	0.998971	-0.287393	0.66944	-0.264286	0.918776	36.8809	19.6533	6.63695	3.54375	20.8409	28.2787	29.6644	22.3845	29.082	13.0275
proteinId311467	PCON_11712	SMAC_09127	-1.02922	NA	0.621736	NA	-1.82298	NA	0.120353	NA	0.0999845	NA	1.37841	NA	0.828523	NA	258.9	214.028	70.9173	54.3754	266.016	275.452	271.306	200.141	142.145	199.216
proteinId311518	PCON_06132	SMAC_01799	-1.33303	NA	-0.506508	NA	-2.55104	NA	0.402325	NA	0.1803	NA	3.24325	NA	-0.431277	NA	37.9714	14.1683	8.26259	16.7835	173.935	146.506	153.272	27.3193	46.6174	271.102
proteinId311542	PCON_04917	SMAC_04402	-3.13555	3.65471e-16	0.902613	0.0444174	0.212726	0.599698	-0.65933	0.532211	-0.0890599	0.998971	-0.963978	0.010633	0.271276	0.841927	94.3473	95.1707	5.90467	211.53	142.267	254.22	219.309	201.421	193.538	51.8047
proteinId311572	PCON_09890	SMAC_05126	-2.90899	0.00407168	-1.25857	0.368728	-0.84005	0.421065	0.533168	0.999874	-0.102872	0.998971	-4.89431	4.43823e-07	0.737143	0.841038	36.5667	7.62672	2.32505	23.0131	79.0943	59.9615	50.9831	152.19	110.411	1.25192
proteinId311585	PCON_07155	SMAC_07302	-1.91332	0.00748226	0.138968	0.927394	1.48542	0.024298	0.28955	0.999874	0.744006	0.998971	-1.07491	0.138698	-0.136926	0.972797	69.1255	40.1807	9.7478	212.526	112.984	103.626	162.286	188.713	266.875	68.5985
proteinId311612	PCON_12486	SMAC_04490	-4.63692	7.28597e-06	-0.18428	0.927438	-4.00255	3.01026e-06	-0.101317	0.999874	-0.593094	0.998971	-4.74095	3.11526e-07	0.937609	0.775337	23.2322	10.9679	0.35331	1.20096	25.5864	31.0805	18.4191	74.5341	42.4525	0.603256
proteinId311735	PCON_07202	SMAC_09608	0.807035	0.488767	-2.67571	0.0323755	-1.78288	0.184531	1.36035	0.969512	0.705705	0.998971	1.39283	0.210814	-0.308422	0.958526	40.2433	3.05169	42.7479	0.067013	1.58694	0.614843	0.961222	1.87577	3.1457	4.09011
proteinId311807	PCON_08673	SMAC_02829	3.06662	1.51493e-05	-1.02859	0.292775	-0.000807092	0.998933	0.441972	0.999874	0.183429	0.998971	0.36054	0.65849	0.932768	0.684075	118.612	30.202	603.382	34.5995	58.5361	47.9596	50.319	269.614	168.311	100.979
proteinId311928	PCON_12693	SMAC_01241	3.7614	9.15073e-09	-3.48755	0.000263564	-1.00844	0.115848	0.300151	0.999874	0.414551	0.998971	-4.76195	1.63887e-11	0.910351	0.667404	7.82005	0.264964	65.2212	19.6425	62.8481	57.1682	70.5569	63.1979	40.7981	0.602746
proteinId311939	PCON_08334	SMAC_00069	-3.03545	3.34438e-06	-2.16452	0.00108031	1.23171	0.0150474	-0.629963	0.995854	-1.11813	0.306898	-2.93427	3.51017e-08	-0.0149899	0.995399	21.3822	2.44283	1.28854	46.0697	15.4851	27.1932	11.3254	31.6682	40.1327	2.67284
proteinId311963	PCON_11287	SMAC_05545	-2.28532	0.0151839	-7.17356	2.41662e-10	0.356376	0.725841	-3.10047	0.00685963	-3.68742	0.000450027	1.33724	0.158944	0.952401	0.765468	60.2617	0.0586833	6.20002	84.3232	8.52777	94.0321	5.71096	231.494	139.092	180.725
proteinId312047	PCON_05905	SMAC_01427	-1.59954	0.00778339	1.92651	0.00342393	0.260183	0.691606	0.787146	0.888379	1.93482	0.010045	3.97653	1.98738e-12	-0.385554	0.853434	157.137	327.073	28.3468	42.8587	77.1336	49.7563	180.537	26.847	43.6568	416.456
proteinId312068	PCON_06358	SMAC_06277	-2.37492	0.00430848	-0.887985	0.448824	-0.819329	0.321933	0.537112	0.999874	0.259362	0.998971	-3.24577	3.9007e-05	0.273187	0.943687	12.4797	3.48712	1.22943	9.31721	31.03	23.7079	26.217	78.5232	82.1664	3.49819
proteinId312119	PCON_08184	SMAC_00396	-0.550226	0.257773	0.649493	0.286377	1.62427	7.18626e-05	1.36573	0.0254631	2.71365	7.23862e-09	2.6092	1.96063e-09	-1.67368	0.0144475	2800.36	2390.2	1090.32	613.514	636.102	274.554	1697.78	30.7187	125.366	420.674
proteinId312144	PCON_04681	SMAC_07025	-3.54628	NA	-1.36052	NA	0.789875	NA	-0.390201	NA	-0.677649	NA	-1.87552	NA	0.706084	NA	7.22407	1.45206	0.282477	24.3592	13.3305	19.9555	11.1952	72.4223	51.3945	6.35666
proteinId312267	PCON_06637	SMAC_04047	4.6927	NA	-3.58287	NA	-0.768012	NA	-3.38581	NA	-1.88891	NA	-5.17059	NA	0.417417	NA	86.5624	3.27247	1464.24	76.3781	14.2879	192.084	44.1678	23.8234	21.9672	0.180096
proteinId312319	PCON_03414	SMAC_02423	-6.21143	3.86504e-12	-0.693877	0.282379	1.3946	0.000903818	0.732408	0.663196	0.0189904	0.998971	5.6272	2.87426e-38	-0.449572	0.786865	52.9967	17.4375	0.14176	185.725	145.741	98.1071	91.3848	12.639	21.6436	595.713
proteinId312320	PCON_03410	SMAC_05741	-0.494482	0.465208	-1.16989	0.132258	-1.96559	0.00025048	0.13476	0.999874	-0.0349956	0.998971	2.39547	2.15661e-05	-0.72966	0.696472	9.48326	2.1947	3.82113	3.91409	21.7472	22.2754	19.9405	13.8471	27.5885	83.4575
proteinId312406	PCON_11631	SMAC_01954	-1.06907	0.276312	-0.262462	0.883389	0.353319	0.693833	0.687943	0.999874	-0.00651794	0.998971	-0.784918	0.367123	0.674199	0.813611	5.91352	2.58322	1.37843	186.219	303.335	208.06	189.929	130.61	109.673	33.7008
proteinId312422	PCON_11355	SMAC_02990	-3.88208	7.73812e-07	0.00431646	0.997539	-0.433148	0.55055	-0.122836	0.999874	-0.180569	0.998971	-1.23591	0.0749419	1.18805	0.538828	19.9072	10.6796	0.60911	24.6786	38.1735	46.9793	37.8907	331.568	171.385	33.3206
proteinId312443	PCON_11486	SMAC_07541	-0.895919	0.00435661	0.817881	0.0234171	-0.539889	0.0696083	-0.195712	0.999874	0.184038	0.998971	-1.70528	1.62062e-08	0.0339205	0.986934	753.028	715.002	228.853	180.509	285.508	368.862	385.506	319.146	395.489	58.8831
proteinId312449	PCON_12831	SMAC_08652	-4.2114	1.12324e-15	-2.36378	5.37013e-06	-2.64378	1.24564e-09	0.0569341	0.999874	-0.0970715	0.998971	-5.06914	4.16184e-14	0.252821	0.902506	68.7726	6.97646	1.9329	8.83133	72.7046	78.7957	67.5832	26.9043	28.3122	0.360559
proteinId312472	PCON_07522	SMAC_07418	-3.68891	7.7502e-09	-0.535838	0.558739	-1.29165	0.0205028	0.310776	0.999874	-0.366313	0.998971	1.69492	0.00405677	-0.145561	0.965819	39.5699	14.5281	1.55532	6.59463	25.4487	23.0315	16.3286	6.99619	9.56001	15.0768
proteinId312486	PCON_09882	SMAC_07608	-3.25155	0.0406055	-3.42366	0.064408	0.439857	0.792723	-2.7141	0.448657	-2.59525	0.510321	-2.82239	0.0578533	-0.147977	0.989753	8.10653	0.0993615	0.131289	35.1689	3.37777	37.0004	3.85691	118.08	167.548	7.54588
proteinId312535	PCON_13067	SMAC_07528	-3.32161	2.96269e-06	-2.27157	0.00390979	-3.83592	8.82397e-10	-5.02059	1.92503e-12	-3.06061	7.35907e-05	2.94607	1.21472e-05	-1.25541	0.523074	31.0685	3.3166	1.64721	4.49613	2.3692	97.9538	10.1484	7.97108	24.3546	108.471
proteinId312545	PCON_08578	SMAC_02766	2.23028	7.40658e-05	-0.194881	0.866711	2.28198	5.29435e-06	1.27646	0.201403	0.372645	0.998971	0.174545	0.785707	0.826891	0.638121	6.80307	3.17576	18.637	95.0112	58.8352	26.8711	32.1077	43.1811	29.0054	15.8664
proteinId312554	PCON_07659	SMAC_06849	-2.05567	7.58651e-05	-1.15415	0.0665726	-0.248155	0.663738	0.7609	0.77687	-0.14637	0.998971	-0.656532	0.235242	0.914886	0.538828	78.4683	18.7061	10.3855	21.6521	54.6815	35.9937	29.8375	34.6184	23.5213	6.949
proteinId312628	PCON_02624	SMAC_03824	-1.33696	0.00162288	-0.623904	0.266108	0.585622	0.147228	-0.192188	0.999874	-0.707889	0.565035	1.66372	3.77361e-05	-0.0408244	0.989753	36.4736	12.6749	8.07126	108.181	78.7187	101.478	56.6946	39.7594	47.5774	78.6949
proteinId312710	PCON_07205	SMAC_05610	2.40831	NA	1.04664	NA	-2.98706	NA	-1.56238	NA	-0.870495	NA	-1.50553	NA	0.787997	NA	31.6278	37.1549	108.492	6.71794	23.4702	84.7801	40.5492	423.947	289.242	43.0753
proteinId313029	PCON_01152	SMAC_03473	-2.99121	0.000317657	-0.728577	0.567392	-2.53321	0.00092845	-0.278886	0.999874	0.190333	0.998971	0.632401	0.480141	0.683092	0.813611	15.8729	5.1051	1.01521	1.27454	7.90091	10.9168	11.4418	37.8964	28.934	20.8068
proteinId313048	PCON_09330	SMAC_06534	-4.22224	1.29484e-13	-0.510745	0.552627	2.65876	1.06885e-07	-0.220566	0.999874	-0.283456	0.998971	-0.229062	0.722266	0.941637	0.572056	40.906	15.276	1.14889	100.196	16.4627	21.6926	16.3066	84.3655	53.6803	21.7904
proteinId313159	PCON_09902	SMAC_01595	1.44156	0.0841201	-0.726481	0.555697	0.476471	0.581187	-1.3513	0.594456	-1.12793	0.839575	2.83843	0.000299235	2.14733	0.177803	49.978	15.7121	80.1229	41.7801	13.747	41.5265	16.7366	160.319	44.7235	195.237
proteinId313211	PCON_09087	SMAC_01952	-0.21994	0.706929	-0.292375	0.746704	0.952224	0.0475829	0.421394	0.999874	0.219169	0.998971	3.68738	2.28034e-14	-0.076422	0.980891	128.507	56.1532	62.8122	329.118	280.179	234.494	251.795	87.0844	111.228	831.59
proteinId313248	PCON_09883	SMAC_07950	0.249029	0.508129	1.79052	2.07167e-07	-0.145511	0.701946	-0.092673	0.999874	0.172092	0.998971	0.50769	0.155898	0.780864	0.357375	198.395	373.085	134.273	37.7686	48.6146	58.5187	60.6065	46.1279	31.3247	23.3011
proteinId313253	PCON_11114	SMAC_02164	0.194475	0.753181	-1.40207	0.025815	-1.67376	0.00126744	0.334089	0.999874	0.402748	0.998971	-1.93921	0.000379332	0.451683	0.813611	55.485	11.0655	36.1834	1.81339	9.42726	8.3945	10.216	20.6912	17.1486	2.2199
proteinId313303	PCON_04425	SMAC_00433	0.714345	0.273702	0.980587	0.216401	0.523273	0.402606	0.40824	0.999874	0.146495	0.998971	-1.2651	0.039734	0.0811904	0.982421	13.3157	14.1765	12.3642	18.2135	20.7956	17.5573	17.8737	17.4678	17.8645	3.94374
proteinId313326	PCON_07861	SMAC_03803	0.355621	0.520436	0.649855	0.33649	0.0531731	0.925015	-0.0840995	0.999874	-0.298862	0.998971	0.594875	0.288675	-0.0329743	0.994019	139.145	118.457	101.326	194.096	219.518	262.608	195.347	7.84334	11.0951	9.05339
proteinId313377	PCON_13670	SMAC_06612	0.877312	0.102033	1.37183	0.0198398	0.280262	0.598718	-0.0275015	0.999874	-0.884762	0.498241	1.27732	0.0101603	0.54172	0.762972	8.62349	12.0994	9.00073	35.5163	35.6813	41.0044	20.2593	28.7487	24.5822	28.918
proteinId313391	PCON_06394	SMAC_01338	2.19231	0.0146405	-0.93337	0.468391	1.09021	0.215918	0.285206	0.999874	0.0308801	0.998971	-1.7448	0.0523559	0.641315	0.841038	38.5735	10.4124	108.023	88.1884	61.2484	56.0297	52.6735	107.699	82.1822	10.3634
proteinId313392	PCON_03600	SMAC_00682	2.97762	0.000187457	1.48399	0.145585	-0.367231	0.681247	0.31824	0.999874	0.235762	0.998971	1.44451	0.0811572	-0.493326	0.868588	62.9659	98.9022	308.489	20.9264	42.1238	37.7417	41.0682	6.74076	12.1496	15.4004
proteinId313416	PCON_13387	SMAC_05579	2.84132	4.3967e-05	0.321716	0.808943	-0.700225	0.333875	0.356192	0.999874	0.855473	0.9846	1.23176	0.0898465	0.30091	0.923113	94.1043	63.3321	406.149	28.1208	74.1625	64.8026	109.84	22.8275	24.6792	32.2656
proteinId313419	PCON_06943	SMAC_01041	-1.42183	0.0511625	1.01508	0.27597	-1.31512	0.0470565	-0.919061	0.891491	-0.699899	0.998971	-1.62372	0.0194309	0.937055	0.667404	7.39878	8.15883	1.5092	5.1531	8.40078	18.3157	10.1754	69.648	43.4943	6.32779
proteinId313430	PCON_08601	SMAC_04149	-2.89615	6.78697e-08	1.15436	0.0750955	0.312208	0.587895	0.340431	0.999874	0.217249	0.998971	-0.623749	0.281523	0.334664	0.863065	61.7237	74.2558	4.50052	52.2799	66.1744	58.6521	62.7663	18.143	15.8654	5.96759
proteinId313467	PCON_04531	SMAC_06450	1.96351	0.00520193	-1.13933	0.214492	-1.7138	0.00870579	-0.639501	0.999874	-0.837682	0.996083	1.22243	0.086308	1.59064	0.355087	38.035	8.91171	87.5612	7.21985	18.87	33.62	16.9191	158.351	60.2135	69.4289
proteinId313506	PCON_09198	SMAC_05795	2.19253	0.000448066	0.667055	0.465558	-1.34001	0.024298	0.298017	0.999874	0.178835	0.998971	-2.18992	0.000402252	0.976733	0.625831	42.632	36.7328	114.661	13.4771	53.0373	48.3422	50.4001	157.386	93.2923	9.38233
proteinId313532	PCON_02664	SMAC_00485	2.70435	0.00161658	-0.737553	0.583291	-0.634114	0.483142	-0.10175	0.999874	-0.488155	0.998971	-1.55323	0.0774135	0.457447	0.897232	16.7561	5.25188	68.206	10.0522	18.2761	22.1889	14.267	28.0676	24.6828	3.57716
proteinId313539	PCON_14057	SMAC_08627	-3.2719	0.00259741	-0.685394	0.70069	4.29432	6.14734e-06	-0.406779	0.999874	-0.108747	0.998971	-2.6488	0.0107516	1.2698	0.708895	12.7966	4.11026	0.595748	42.0136	1.58593	2.45276	2.07657	312.245	152.029	9.37987
proteinId313562	PCON_06218	SMAC_03489	-0.230545	0.801027	1.26897	0.212905	1.56922	0.0346919	-0.651898	0.999874	1.45636	0.431271	-1.26148	0.116494	1.58184	0.465336	22.4249	30.2309	10.7931	18.9819	4.70591	8.55716	22.6224	117.726	51.1679	11.258
proteinId313577	PCON_12713	SMAC_06353	2.97171	6.95687e-14	-1.41458	0.00244625	2.08646	1.14447e-08	0.119926	0.999874	-0.0136453	0.998971	-0.411072	0.353465	-0.0564651	0.982337	18.3668	3.64498	83.5169	136.423	42.9482	44.5038	40.4423	28.1371	33.192	13.2231
proteinId313599	PCON_07735	SMAC_07919	-2.0174	0.0272933	1.18939	0.318687	0.760287	0.402606	-0.161288	0.999874	-0.0941791	0.998971	-4.63536	2.09625e-07	0.553362	0.858565	19.5589	25.1727	2.51968	68.1445	44.9336	56.9737	48.9167	34.3416	27.2772	0.398045
proteinId313670	PCON_10124	SMAC_01647	1.47139	0.0630595	0.00758501	0.996896	1.87949	0.00843362	-0.351058	0.999874	-0.514625	0.998971	1.27251	0.127178	1.58514	0.494199	53.364	28.7995	87.477	35.6353	8.96451	13.0195	8.25949	8.70019	3.3155	3.76321
proteinId313673	PCON_04482	SMAC_07311	-0.1869	0.792681	-0.992033	0.218528	-2.59766	1.98872e-05	0.0670184	0.999874	0.345944	0.998971	-2.05556	0.000708079	0.038937	0.994019	27.1728	7.23988	13.5475	0.640725	5.88579	6.32109	7.39528	28.5203	31.2921	3.71829
proteinId313805	PCON_10213	SMAC_02645	-1.86017	0.000166231	0.159931	0.870259	1.88991	1.44661e-05	0.0683624	0.999874	0.112539	0.998971	1.00387	0.0411559	1.07168	0.390118	35.7401	21.4558	5.47648	180.168	62.9086	67.6396	67.188	94.0609	50.3055	52.7265
proteinId313818	PCON_12944	SMAC_03322	-2.34375	0.00665247	-0.442203	0.776109	1.61014	0.0474869	0.218064	0.999874	-0.560692	0.998971	-1.04658	0.243095	0.984214	0.739217	26.844	10.4411	2.74353	92.6128	42.3293	40.6472	24.7982	113.842	68.0718	14.4943
proteinId313842	PCON_03565	SMAC_03700	-0.445163	0.65404	0.0424726	0.984406	-1.37059	0.105601	-0.376688	0.999874	-0.0838223	0.998971	-1.51546	0.0895328	-0.754018	0.810127	326.366	180.287	133.135	69.8176	177.341	263.548	227.419	189.135	411.267	80.4609
proteinId313857	PCON_09563	SMAC_01718	-1.68046	0.00019722	0.365644	0.609494	-1.79758	1.00843e-05	-0.0435275	0.999874	-0.149617	0.998971	1.01886	0.0249641	-0.0289273	0.994019	50.2734	34.7557	8.71686	17.5932	74.7469	86.8688	71.8107	30.9025	37.7442	38.6951
proteinId313875	PCON_08426	SMAC_01635	0.690267	0.180041	0.247384	0.779688	0.537358	0.270594	-0.221922	0.999874	-0.272253	0.998971	2.84818	1.43066e-09	-0.0460453	0.989753	174.03	111.283	160.97	120.418	87.5492	115.26	87.3815	12.738	17.3847	68.4365
proteinId313893	PCON_05399	SMAC_02951	-1.11055	0.0217888	0.8954	0.1176	1.51317	0.000256369	-0.0717012	0.999874	0.185775	0.998971	2.92276	2.41566e-11	0.101564	0.970641	20.8732	20.979	5.41488	49.3731	20.2183	24.0121	25.1362	14.8347	18.2888	73.7492
proteinId313904	PCON_07944	SMAC_09230	0.919432	0.241595	-0.00754149	0.996896	-0.0553833	0.947576	-0.0636609	0.999874	0.135816	0.998971	-3.8482	2.30854e-07	0.751973	0.770757	41.9066	22.2178	45.882	19.9857	24.5876	29.0136	29.3323	18.1543	13.4662	0.365927
proteinId313929	PCON_12398	SMAC_03756	-1.56172	0.023945	0.159103	0.911517	-0.978438	0.135041	0.254665	0.999874	0.248648	0.998971	1.05298	0.130177	-0.772608	0.746694	30.9718	18.6341	5.76708	12.3874	36.8787	34.6061	38.0513	5.99729	12.1054	15.2213
proteinId313930	PCON_06295	SMAC_05898	-3.53708	3.80343e-13	0.881724	0.162232	1.08998	0.0187842	-0.220966	0.999874	0.045687	0.998971	0.120243	0.834828	0.220363	0.91868	133.933	135.37	6.33929	57.6108	28.4612	37.5579	35.5663	36.0719	37.3106	20.0306
proteinId313981	PCON_10469	SMAC_04612	3.91687	2.05887e-06	1.87255	0.0650753	-0.63332	0.475253	0.809779	0.999874	0.0477848	0.998971	-1.03889	0.242647	0.256312	0.953309	65.7862	137.258	638.624	80.1373	281.331	175.789	167.094	69.8924	72.5016	19.9316
proteinId314021	PCON_03325	SMAC_00934	-0.919197	0.255228	0.772436	0.482271	2.92842	1.54054e-05	-0.123324	0.999874	1.93811	0.0875695	-1.0556	0.177212	-0.110917	0.981551	117.348	109.748	34.3642	178.3	25.1658	31.0052	115.466	62.5676	84.5232	22.8117
proteinId314024	PCON_07884	SMAC_00953	0.530817	0.56754	-0.0503907	0.980266	0.201148	0.831122	-0.301657	0.999874	-0.879129	0.998971	-2.8533	0.000904086	0.230359	0.959679	40.9137	21.1796	34.1692	111.467	99.3528	139.201	67.8603	16.4965	18.127	1.09058
proteinId314046	PCON_06638	SMAC_06264	1.39503	NA	2.96656	NA	-0.322393	NA	0.37913	NA	0.259587	NA	-2.11695	NA	-0.0228934	NA	1429.11	6465.56	2208.55	57.8937	116.439	99.7185	110.534	938.371	1238.59	152.878
proteinId314064	PCON_05679	SMAC_04380	2.50665	1.46725e-10	0.583274	0.288439	-3.13358	1.76461e-16	0.328837	0.999874	-0.0816437	0.998971	0.800044	0.0506863	-0.142953	0.940754	25.0144	20.1914	81.8693	2.07167	30.3382	27.1951	23.5339	37.9459	52.2182	45.8567
proteinId314069	PCON_02857	SMAC_04221	-0.516902	0.557476	-0.585836	0.643904	-2.0346	0.00495135	-0.115262	0.999874	0.291192	0.998971	0.845501	0.308455	-0.165109	0.970923	718.08	251.005	277.495	70.6603	349.609	429.18	485.591	190.182	274.593	290.849
proteinId314073	PCON_07840	SMAC_01875	2.08319	0.00859536	-0.875895	0.440172	-0.747812	0.352121	-0.351159	0.999874	-0.00581403	0.998971	-2.20524	0.00479953	0.45259	0.878565	23.9379	6.72042	60.5042	43.889	73.236	106.409	97.5045	66.5699	59.6273	5.51937
proteinId314088	PCON_02575	SMAC_03087	0.533327	0.527804	1.03588	0.310533	1.92538	0.00594538	-0.648326	0.999874	-0.0512453	0.998971	-2.87945	9.24595e-05	0.0729285	0.989753	200.335	227.798	167.549	139.39	27.2258	49.1312	43.4525	171.722	203.095	14.8175
proteinId3141	PCON_09050	SMAC_06538	1.21571	0.0277613	0.807374	0.264109	1.98845	4.084e-05	0.00606583	0.999874	-0.172478	0.998971	-1.29923	0.0206519	0.464808	0.812864	28.6723	27.222	38.3427	177.484	54.8142	61.5373	50.0247	24.6376	20.9381	4.08891
proteinId314138	PCON_05056	SMAC_01181	1.69957	1.47951e-07	0.506322	0.254188	-4.11062	2.43368e-26	0.687562	0.339145	1.05852	0.0152947	3.10016	3.63243e-22	-0.60773	0.535623	63.9743	48.7941	118.79	0.735497	27.3622	19.085	36.7007	8.45179	15.5142	68.7167
proteinId314176	PCON_06070	SMAC_02512	1.22998	0.0373446	-0.274571	0.797179	-5.72286	3.60971e-16	-0.0828837	0.999874	0.0928215	0.998971	-3.51009	3.59815e-10	-0.340527	0.870999	13.5854	5.9984	18.328	0.311293	21.9656	26.2764	25.7319	61.2419	84.8534	3.97444
proteinId314191	PCON_02291	SMAC_07965	1.59012	0.00878972	-1.27253	0.0822776	-0.649371	0.283866	-0.0406765	0.999874	-0.017392	0.998971	-1.83527	0.00196369	0.369117	0.863065	58.7007	12.6818	102.351	35.822	67.9708	78.8902	71.4406	86.4985	74.78	10.3057
proteinId314202	PCON_05350	SMAC_04262	2.34022	2.96631e-08	0.449073	0.481725	1.36047	0.000605019	0.246089	0.999874	0.0304926	0.998971	-4.21138	8.52377e-18	-0.0231933	0.994019	136.325	100.809	400.706	214.935	122.835	116.605	109.307	32.2883	39.9089	1.10331
proteinId314257	PCON_02816	SMAC_02461	-0.142275	0.821302	0.732127	0.316905	1.64592	0.000806275	-0.0488105	0.999874	0.203949	0.998971	-0.324654	0.584144	0.816218	0.638121	86.2529	77.7006	44.3501	82.5976	31.1904	36.4264	38.6726	296.802	217.98	91.7042
proteinId314272	PCON_14054	SMAC_08864	3.94692	NA	0.0253643	NA	0.458632	NA	0.0171339	NA	0.429825	NA	-2.6718	NA	-0.708973	NA	31.4353	17.2916	300.412	43.6362	39.7749	44.3592	55.4236	20.8848	44.8942	3.62902
proteinId314303	PCON_14250	SMAC_01213	-3.57146	3.5804e-16	0.0120927	0.992484	1.67594	2.15163e-06	0.112975	0.999874	-0.0602682	0.998971	1.56439	5.12679e-05	-0.135692	0.942902	50.7415	27.5917	2.35015	132.713	55.4672	57.7235	50.9906	36.0802	47.4032	72.6135
proteinId314356	PCON_13495	SMAC_00434	-4.64993	3.39669e-06	0.548758	0.742872	0.601115	0.556984	-0.595928	0.999874	-0.24763	0.998971	-1.17418	0.337186	2.13475	0.42573	45.1198	36.3248	0.799691	11.7933	6.11744	10.7003	8.19832	6.08229	1.84584	0.234255
proteinId314386	PCON_08644	SMAC_05597	-2.19932	0.00159445	0.635861	0.544734	0.336253	0.654757	0.220217	0.999874	0.361362	0.998971	0.725299	0.319857	0.619121	0.8059	70.2244	59.4606	8.25646	36.1892	41.2718	39.7808	47.2111	62.8209	52.8813	49.0227
proteinId314396	PCON_12943	SMAC_07054	0.207392	0.84092	-1.04898	0.396784	1.42662	0.0874251	0.178266	0.999874	-0.138711	0.998971	3.33117	7.90178e-05	0.387335	0.918017	6.15329	1.53194	4.06033	31.6159	16.3684	16.1989	13.4206	8.84699	7.76963	41.6207
proteinId314397	PCON_04833	SMAC_03709	-1.80959	0.00589728	-0.492206	0.636091	2.08287	0.000342803	-0.0420932	0.999874	0.0483089	0.998971	-1.54101	0.0190463	-0.593017	0.799532	25.5354	9.64308	3.99298	122.114	34.5117	40.0727	38.0643	5.95153	11.988	2.17815
proteinId314415	PCON_05951	SMAC_00077	0.781581	0.115222	-0.47126	0.501973	0.886257	0.0490661	0.210877	0.999874	0.014932	0.998971	0.836709	0.0873399	0.0389353	0.99246	66.1921	25.3751	64.993	47.2987	36.751	35.7055	33.1448	21.0467	25.9427	23.4588
proteinId314461	PCON_11902	SMAC_01999	1.18705	NA	-0.399376	NA	-0.108318	NA	-0.128057	NA	-0.313289	NA	-0.964796	NA	0.741135	NA	10.9946	4.41198	14.5847	68.4216	84.389	104.268	76.3809	85.0759	60.5806	13.9869
proteinId314478	PCON_04704	SMAC_01991	-0.213168	0.776796	-0.743561	0.426824	0.0653574	0.929775	-0.876419	0.878385	-0.45538	0.998971	0.158193	0.842391	-0.310783	0.913679	82.9099	26.1974	40.222	86.8458	55.6313	117.113	77.7344	4.37634	6.11513	4.20098
proteinId314482	PCON_01988	SMAC_03656	0.6641	0.265327	0.19253	0.860993	-1.74037	0.000635094	0.0370307	0.999874	0.179638	0.998971	-0.260279	0.680546	0.12401	0.969182	49.5973	30.6158	45.0641	13.5858	59.7839	65.7294	68.5141	32.7517	39.7607	15.2505
proteinId314483	PCON_03736	SMAC_03655	0.461005	0.628985	0.3591	0.82152	0.744923	0.391991	-0.494537	0.999874	-0.587333	0.998971	-4.94205	9.7975e-09	0.433444	0.902403	28.1738	19.5895	22.3167	49.2176	25.0695	40.541	24.2241	21.3767	19.1993	0.216362
proteinId314494	PCON_04717	SMAC_04803	3.26254	1.57122e-08	-0.623477	0.482754	-4.30511	9.07753e-15	0.0294605	0.999874	-0.177324	0.998971	-1.91432	0.00108218	0.380937	0.853434	10.0951	3.46012	57.8004	1.28177	32.2869	35.655	28.8406	46.6945	44.0567	5.36961
proteinId314502	PCON_04708	SMAC_07179	1.38764	0.00122472	-0.105108	0.907333	-0.287589	0.527969	0.462058	0.999874	-0.0975026	0.998971	1.74421	3.12524e-05	-0.474937	0.762972	619.548	307.816	925.269	183.934	386.751	315.301	270.285	70.1459	117.238	219.995
proteinId314548	PCON_03333	SMAC_05973	-1.3538	0.020403	1.8784	0.00144215	-0.770127	0.139986	0.326412	0.999874	-0.0307781	0.998971	-0.0655595	0.918466	-1.03613	0.502174	4.69738	9.39065	1.00356	6.50788	17.4208	15.5936	14.0307	3.69013	8.93468	4.8684
proteinId314549	PCON_03331	SMAC_00926	0.138937	0.795907	0.628959	0.315301	1.34329	0.00135404	-0.777043	0.586027	-0.28975	0.998971	-0.703998	0.139131	0.480521	0.762972	57.0528	47.624	35.7458	190.307	53.5243	104.294	78.2082	155.393	149.913	46.867
proteinId314558	PCON_13323	SMAC_04431	0.252206	0.626173	0.861699	0.130908	0.181856	0.719488	0.426503	0.999874	0.591963	0.926951	-4.21887	1.60534e-21	-0.459397	0.771635	208.974	205.333	141.461	49.0546	71.8056	60.0013	83.4831	176.475	312.973	8.59132
proteinId314567	PCON_02178	SMAC_05400	-0.0197672	0.976653	-0.38578	0.63883	0.121556	0.834935	0.290908	0.999874	0.112613	0.998971	2.55516	1.90774e-07	-0.203101	0.929374	120.082	48.7037	66.6616	61.9061	87.0272	79.8935	79.4231	15.7569	22.7113	75.7707
proteinId314592	PCON_04085	SMAC_01599	1.5266	0.000753165	-0.439325	0.520676	1.59573	0.000102983	0.190161	0.999874	0.451376	0.998971	-0.57664	0.227498	-0.210359	0.913354	83.0072	32.4743	136.92	159.834	74.5137	73.5277	92.677	66.9079	95.8562	34.875
proteinId314638	PCON_09060	SMAC_01502	0.598747	0.483197	0.316444	0.831956	-1.27952	0.0845348	-0.555191	0.999874	-0.0200328	0.998971	-1.29434	0.102211	0.268838	0.9414	331.651	223.083	288.327	59.0575	122.698	206.765	187.132	83.0658	89.763	19.8791
proteinId314656	PCON_05536	SMAC_05543	0.500721	0.249263	0.377416	0.538683	-0.171891	0.703703	-0.0889268	0.999874	0.0195774	0.998971	-1.11204	0.00630745	0.00565513	0.995626	74.1263	51.7886	59.7151	20.1021	26.3222	31.5822	29.3224	39.9895	47.6116	10.8647
proteinId314697	PCON_13624	SMAC_00896	-2.01027	NA	-0.296082	NA	0.698689	NA	1.11419	NA	2.90277	NA	2.44663	NA	-0.8921	NA	128.339	56.0711	17.5908	41.2668	68.4365	34.9413	252.039	24.2541	49.2263	151.279
proteinId314748	PCON_05693	SMAC_02265	0.384415	0.421755	0.181923	0.828233	-0.486157	0.26888	0.654621	0.737688	0.479446	0.998971	1.33944	0.002044	0.383883	0.810127	75.2702	45.7927	56.2385	27.9454	77.0523	54.8489	70.494	23.0619	20.042	27.4522
proteinId314779	PCON_06797	SMAC_04407	-0.833051	0.105366	0.0124141	0.993956	-2.2135	5.95458e-07	0.173922	0.999874	-0.2168	0.998971	1.65941	0.000570792	0.188382	0.930969	50.4991	27.192	15.9957	7.42171	48.7005	48.5261	38.2473	23.3839	23.0446	39.9675
proteinId314790	PCON_14178	SMAC_08623	0.30195	0.464857	-0.656824	0.170074	-2.39983	2.79634e-13	-0.253602	0.999874	-0.116678	0.998971	0.636246	0.0972962	0.268554	0.841927	104.323	35.2036	72.6949	33.2564	185.524	249.755	211.263	60.4483	60.9293	47.9441
proteinId314803	PCON_13834	SMAC_04583	0.920212	0.0228777	0.644125	0.214723	-0.991157	0.00679858	-0.305133	0.999874	-0.39438	0.998971	-1.70119	1.39227e-05	0.0894945	0.969182	44.9927	37.7267	48.2371	37.3988	74.9764	104.528	72.7715	32.6145	35.4741	5.57924
proteinId314852	PCON_05602	SMAC_04747	1.9689	0.0632189	-3.75927	0.00455669	-5.08155	9.31535e-08	-4.19002	0.000357754	-1.89279	0.431271	0.882666	0.419964	1.32815	0.678223	4.24329	0.0803047	10.3533	0.548457	1.43226	37.9234	8.36996	159.043	74.948	81.5452
proteinId314858	PCON_04757	SMAC_02235	1.37999	0.0253414	0.00227882	0.998161	-1.58829	0.00476173	-0.148656	0.999874	-0.192801	0.998971	-2.34701	9.30758e-05	-0.271295	0.917839	31.7866	16.9842	47.8624	8.64403	29.6172	37.0878	29.7266	21.7293	27.6933	2.85159
proteinId314892	PCON_03034	SMAC_04520	-1.63464	0.043605	0.591665	0.642072	1.5991	0.0314041	-0.792298	0.999874	0.323912	0.998971	-0.0441259	0.963588	-0.613637	0.828339	109.392	91.0406	19.1999	147.513	32.8912	65.8759	76.4603	86.3208	162.631	92.8157
proteinId314907	PCON_09594	SMAC_06272	-0.831548	0.0837395	0.433155	0.527984	-0.448126	0.340112	0.087301	0.999874	0.0832816	0.998971	-1.01339	0.0271905	0.411215	0.803237	31.8635	23.0662	9.95815	13.8615	24.989	26.5151	25.8239	56.3094	49.6553	12.5626
proteinId314948	PCON_01588	SMAC_03890	1.00723	0.258723	0.620936	0.644498	1.50691	0.0573605	0.119526	0.999874	0.13346	0.998971	-0.747805	0.403635	1.53952	0.512733	21.0865	17.6014	24.6391	65.1489	29.8878	30.9073	31.2159	101.775	38.8623	10.6292
proteinId314966	PCON_06058	SMAC_04158	1.27424	0.0508485	-0.916667	0.282842	-0.828609	0.183879	0.238827	0.999874	0.270912	0.998971	-6.10768	1.80251e-21	0.753347	0.725396	36.4602	10.1472	51.1063	36.4043	97.176	92.407	102.802	109.968	74.6809	0.448467
proteinId314970	PCON_08196	SMAC_00240	0.964485	0.0107971	-0.231382	0.72049	-1.57805	3.44617e-06	-0.351868	0.999874	-0.465623	0.958605	0.785059	0.0452144	-0.611372	0.623112	31.7477	14.4306	35.2391	7.71382	22.1373	31.8932	21.1283	3.31581	6.35363	5.69024
proteinId314975	PCON_07531	SMAC_00498	1.57007	0.0102174	1.86999	0.00583934	1.03282	0.0783353	0.122522	0.999874	0.167761	0.998971	-1.74995	0.00364426	-0.422074	0.844562	104.805	212.088	181.311	58.4701	37.842	39.1104	40.5189	48.2629	78.2701	12.7581
proteinId315005	PCON_11246	SMAC_06968	-0.326541	0.748856	-0.27285	0.880588	-0.161722	0.874094	-0.357842	0.999874	-0.463401	0.998971	-8.68137	8.85768e-19	0.340079	0.930969	10.5525	4.60393	4.69025	39.7469	43.5816	63.8245	41.647	86.9107	84.1189	0.0413665
proteinId315075	PCON_08929	SMAC_00360	2.74257	0.000869401	-2.07085	0.0374886	-1.73935	0.0272019	-0.226723	0.999874	-0.31255	0.998971	-0.601786	0.513089	0.763037	0.799532	8.77991	1.03273	36.34	2.6401	9.64367	12.8045	9.3639	7.6905	5.10815	1.55841
proteinId315124	PCON_12245	SMAC_00609	-0.0127918	0.986841	-0.982198	0.16821	-2.32869	3.0608e-06	-0.667532	0.972075	-0.738326	0.896344	-3.97217	2.0071e-07	0.791363	0.667404	27.7125	7.4231	15.6257	10.3316	41.2578	74.5607	40.5674	2.76112	1.91662	0.0515714
proteinId315126	PCON_03270	SMAC_00410	1.69395	0.00695671	0.367785	0.736807	0.977017	0.103935	-0.0570235	0.999874	0.294183	0.998971	1.22095	0.0531977	-0.301079	0.909949	173.042	120.18	327.704	289.106	173.803	204.492	230.743	52.6055	80.8279	109.845
proteinId315155	PCON_05085	SMAC_00184	0.473232	0.54673	-1.08452	0.244208	-2.52087	9.44656e-05	-0.111783	0.999874	-0.473097	0.998971	-2.60052	0.000141605	1.37348	0.494199	20.1506	4.96715	15.9702	1.76461	12.0587	14.714	9.62451	116.336	53.0908	3.83288
proteinId315201	PCON_02439	SMAC_08934	-6.43776	1.43842e-09	-7.23099	8.70378e-11	-0.899015	0.420798	-0.656337	0.999874	1.19128	0.998971	-0.636927	0.590798	0.551894	0.902403	198.307	0.384984	0.789933	25.6587	39.0659	72.1885	160.709	28.0763	23.4783	7.34045
proteinId315219	PCON_05577	SMAC_04649	-1.47928	0.112868	-0.0849836	0.969603	-2.55558	0.00249593	1.16695	0.903795	2.02294	0.191237	-4.91933	1.2267e-08	-0.975273	0.762972	607.195	307.888	118.079	2.42578	45.4849	21.7843	88.1947	95.6604	243.881	3.87363
proteinId315290	PCON_10386	SMAC_05429	-0.0444997	0.954528	-0.134132	0.916884	0.360087	0.574863	-0.189369	0.999874	0.00983812	0.998971	-0.174242	0.799745	0.216271	0.938953	56.9868	28.2372	31.6934	22.9011	19.2142	24.8156	22.8079	85.803	88.5977	38.7872
proteinId315307	PCON_11301	SMAC_04953	2.26758	0.000199658	2.18983	0.001154	0.474819	0.464915	-0.361998	0.999874	0.0139101	0.998971	-1.64854	0.00796213	1.06902	0.546749	91.4359	233.79	261.194	33.8346	23.1109	33.7299	31.2221	94.1633	53.3551	7.75916
proteinId315320	PCON_06534	SMAC_02532	0.552927	0.318592	0.356965	0.673218	0.350796	0.511137	-0.602288	0.979684	-0.51474	0.998971	-1.38529	0.0060692	-0.246044	0.909866	16.7598	11.5429	14.0129	67.7277	43.3678	74.8694	47.7668	48.6494	66.4596	12.7093
proteinId315396	PCON_06966	SMAC_01734	-0.897442	0.398313	-0.541142	0.75522	-0.295999	0.785511	-0.15422	0.999874	-0.585612	0.998971	0.315988	0.774637	0.529459	0.890978	5.22942	1.86887	1.49855	18.3173	25.3976	32.0753	19.0644	43.6717	36.6576	20.5737
proteinId315412	PCON_04213	SMAC_02161	2.60077	6.49314e-06	-0.799209	0.320896	1.67654	0.00187122	0.101268	0.999874	-0.3509	0.998971	-2.69364	3.09193e-06	-0.0464046	0.99246	76.3095	23.2833	271.682	465.353	193.059	202.321	145.116	59.6301	70.4631	5.46272
proteinId315486	PCON_06701	SMAC_06323	-0.0666207	0.94357	0.0508414	0.976566	3.08437	3.6978e-06	0.366712	0.999874	0.713083	0.998971	-4.46168	0.000111634	1.68682	0.397893	103.997	58.0365	56.5436	445.141	81.2245	70.465	108.019	15.7207	6.10262	0
proteinId315487	PCON_14255	SMAC_02141	1.46391	0.00926508	-0.0520317	0.969622	0.709265	0.194767	0.0472594	0.999874	-0.0287559	0.998971	-0.622903	0.289955	0.081089	0.981829	18.2005	9.40696	29.1623	51.6678	40.9876	44.6635	40.2098	29.2393	32.7916	10.4423
proteinId315510	PCON_03505	SMAC_03956	5.33752	8.82221e-28	-0.176349	0.865039	-0.331549	0.545816	-0.0492972	0.999874	0.15886	0.998971	2.3319	2.48296e-06	-0.46048	0.8059	25.0515	11.8827	612.705	28.1393	42.3367	49.3676	50.7122	29.5999	49.3972	143.892
proteinId315526	PCON_11215	SMAC_00652	-0.0740018	0.898899	-0.109899	0.915286	-1.57453	0.000419307	0.0934238	0.999874	0.263935	0.998971	0.375723	0.472892	0.329519	0.84651	183.277	91.1429	99.2269	13.1304	52.573	55.5313	61.4028	179.316	169.583	109.532
proteinId315529	PCON_12004	SMAC_03471	1.33424	0.0395921	-0.00891411	0.996377	-4.34848	2.73685e-14	0.165759	0.999874	-0.203209	0.998971	-0.767664	0.249469	1.22508	0.502174	74.9954	40.0335	110.16	2.51959	75.3152	75.4611	59.8663	117.378	56.7294	16.1203
proteinId315535	PCON_11679	SMAC_06620	1.98288	1.7454e-05	-0.657237	0.303968	1.26926	0.00329104	0.366582	0.999874	-0.110132	0.998971	1.34801	0.00385403	0.830702	0.535623	191.5	64.8199	438.274	341.242	225.454	196.259	167.029	139.363	101.388	138.324
proteinId315543	PCON_13596	SMAC_00447	0.249403	0.689271	-1.5585	0.0133944	-1.51378	0.00265032	-0.407482	0.999874	-0.365218	0.998971	-4.76408	2.21409e-14	-0.571989	0.765104	22.6278	4.01835	15.1982	5.83793	15.7721	23.6889	16.8161	6.3107	11.0358	0.176887
proteinId315615	PCON_13279	SMAC_08873	0.706326	NA	1.33276	NA	-1.77664	NA	1.18537	NA	0.676591	NA	3.63377	NA	0.157867	NA	70.1123	98.9344	66.4693	15.3355	159.433	76.2261	114.212	69.0375	77.1981	609.15
proteinId315627	PCON_05642	SMAC_08261	0.236239	0.649231	-0.887418	0.119526	-2.38948	6.41051e-09	0.526723	0.995854	0.730509	0.669176	-0.339439	0.496427	0.0856936	0.975216	52.2678	14.981	34.9181	6.86059	65.5918	51.053	78.3012	42.0263	44.5623	19.1758
proteinId315665	PCON_12441	SMAC_03391	0.213104	0.64659	1.8686	1.26512e-05	1.36213	0.000229535	0.495109	0.96758	1.05388	0.0865797	-2.39362	2.49299e-09	-0.215826	0.899909	127.796	254.054	83.8508	132.339	90.1808	71.9275	138.377	52.2714	74.6074	7.53978
proteinId315683	PCON_04655	SMAC_07848	0.122919	0.757729	-0.642421	0.145565	-1.38234	8.75517e-06	-0.153848	0.999874	-0.16355	0.998971	-1.33655	0.000123089	-0.490815	0.662986	31.0555	10.6119	19.1248	14.1214	41.2615	51.7583	42.391	12.7544	21.8441	4.54935
proteinId315686	PCON_11993	SMAC_06162	1.27662	0.0470806	0.235589	0.84793	-1.69677	0.00331148	0.404091	0.999874	0.15158	0.998971	1.20811	0.0574065	0.357193	0.883223	18.9888	11.9358	26.5326	6.17244	33.698	28.5042	29.0965	12.548	12.1294	13.4207
proteinId315729	PCON_11444	SMAC_06034	1.00264	0.0250819	0.00318195	0.997209	-0.534203	0.22049	0.123174	0.999874	0.0785629	0.998971	-4.43281	7.06376e-26	0.0471919	0.986934	66.9185	35.7957	76.5933	30.9478	60.8763	62.9172	61.0057	194.825	210.287	5.10171
proteinId315761	PCON_12317	SMAC_08139	1.3684	0.0708042	0.120857	0.939266	-1.40362	0.0437077	-0.496487	0.999874	-0.177863	0.998971	-1.13569	0.133588	-0.301557	0.923353	89.0556	51.4839	133.517	23.9598	56.1989	90.5858	73.0335	66.8297	99.9399	26.0268
proteinId315769	PCON_08122	SMAC_00833	0.81533	0.1309	-0.359312	0.673534	1.3406	0.00447077	-0.195384	0.999874	-0.353388	0.998971	-2.50063	1.39227e-05	0.115716	0.970641	76.8994	32.0048	77.263	201.032	85.3624	110.468	79.0555	12.8317	14.6042	1.38144
proteinId315822	PCON_03896	SMAC_02440	6.05819	NA	-4.2598	NA	-2.92035	NA	-4.50645	NA	-4.2834	NA	2.41884	NA	-0.327697	NA	124.861	3.11397	5310.86	17.321	6.8181	196.24	8.26366	7.75871	12.0976	34.2741
proteinId315869	PCON_11434	SMAC_01801	-1.00916	0.0807378	0.699443	0.358108	-1.53202	0.00251657	0.483979	0.999874	0.176346	0.998971	-4.86251	1.50218e-15	-0.388786	0.843056	13.0279	11.298	3.56265	4.5997	23.5554	18.885	19.6374	9.73665	16.2001	0.233996
proteinId31588	PCON_14276	SMAC_03878	3.05311	1.91962e-05	-2.37563	0.00349748	-2.20602	0.000969384	0.451792	0.999874	-0.0595348	0.998971	-0.192461	0.81888	0.744468	0.770757	64.4706	6.25514	329.06	11.3752	93.6438	76.1869	66.922	376.157	275.698	139.047
proteinId315905	PCON_02773	SMAC_00646	-0.078472	0.840927	0.324221	0.506529	1.53352	1.61656e-07	-0.230709	0.999874	0.0766674	0.998971	0.0995356	0.794029	-0.330249	0.775653	392.287	263.419	210.603	546.866	198.463	263.054	254.482	84.5234	125.509	73.3335
proteinId315933	PCON_06468	SMAC_07343	0.660322	0.426629	0.0627043	0.972448	-0.617985	0.431135	0.234696	0.999874	0.184629	0.998971	1.86775	0.0132045	-0.41248	0.892153	99.7862	55.948	90.6606	48.8722	111.968	106.546	111.656	15.7963	27.0046	59.8948
proteinId315949	PCON_01037	SMAC_02484	-0.155159	0.813282	1.77839	0.00458333	-0.138112	0.831143	-0.260071	0.999874	0.0620512	0.998971	-0.342171	0.582319	-0.0122875	0.995399	65.4552	123.935	33.3811	37.2039	42.1992	57.3097	54.9023	42.1877	50.5287	22.704
proteinId315968	PCON_05784	SMAC_04765	-3.07001	3.70604e-07	0.897439	0.20302	-3.21504	2.67544e-10	-0.0888147	0.999874	0.0898217	0.998971	-1.73178	0.00119796	0.793484	0.638121	24.0673	24.3557	1.52257	2.48821	27.4437	32.9533	32.2022	87.2228	59.4548	8.49981
proteinId315977	PCON_01840	SMAC_05447	1.57819	0.0011976	0.142719	0.886366	-1.22822	0.00723603	-1.06609	0.258334	-0.609875	0.958605	-0.110922	0.846778	-0.0331751	0.993557	51.6386	30.4721	88.8279	14.5176	19.9078	47.4983	28.4093	44.7738	57.8018	28.7023
proteinId315980	PCON_12884	SMAC_00990	-0.376554	0.689156	1.2396	0.256943	-0.407459	0.649656	0.24297	0.999874	0.181005	0.998971	-1.0592	0.21889	-0.130615	0.978014	65.7822	86.6264	28.5584	43.0617	85.6155	81.0156	84.7628	40.7365	54.995	15.0714
proteinId315986	PCON_02807	SMAC_09015	2.551	0.000213598	-1.61914	0.0549704	3.52151	1.30787e-08	-0.0975389	0.999874	0.482202	0.998971	0.897643	0.222009	0.787267	0.757245	22.6464	3.77663	79.8885	179.592	17.3116	20.9096	27.1676	14.9795	11.0952	11.7839
proteinId316059	PCON_03651	SMAC_09396	-0.198651	0.813327	0.379157	0.77084	-0.696057	0.347882	0.328768	0.999874	0.242662	0.998971	-1.79166	0.0130993	-0.259588	0.939673	202.138	142.26	99.3576	53.8906	138.388	123.184	134.566	97.5772	148.483	23.5646
proteinId316098	PCON_13277	SMAC_08577	0.881477	NA	0.692772	NA	2.41153	NA	0.186546	NA	0.310035	NA	-0.411515	NA	0.234137	NA	504.473	451.716	547.732	1204.88	301.25	296.329	341.204	438.718	473.18	203.758
proteinId316123	PCON_06467	SMAC_01158	0.650353	0.241971	0.163658	0.875376	-2.53461	4.33305e-08	-0.167384	0.999874	-0.404351	0.998971	1.75174	0.000589271	-0.104582	0.972532	508.586	303.95	452.969	37.8934	248.118	314.933	217.146	43.0446	57.5842	108.946
proteinId316169	PCON_05719	SMAC_12075	1.20523	0.206674	-0.285253	0.874053	3.09297	0.000142402	0.476877	0.999874	0.442456	0.998971	-6.56068	5.73692e-12	0.583052	0.8528	28.8745	12.5806	39.4666	107.24	20.4555	16.2552	20.6337	61.1705	49.0335	0.144862
proteinId316221	PCON_04323	SMAC_00242	1.01807	0.147615	-0.012511	0.99614	2.05025	0.000764427	0.381362	0.999874	0.19807	0.998971	0.0295029	0.971249	0.586594	0.809329	199.804	105.88	233.401	243.569	92.5233	79.3591	84.1133	77.4624	72.516	38.1549
proteinId316239	PCON_10426	SMAC_05826	0.582259	0.312778	1.24125	0.0488911	2.64702	1.91078e-08	-0.233882	0.999874	0.200063	0.998971	-1.63531	0.00235609	0.384002	0.841927	44.0475	56.974	37.7534	191.087	31.4123	41.7956	44.0598	26.1475	23.7718	4.25488
proteinId316244	PCON_13288	SMAC_03897	-0.89526	0.141496	-0.0358261	0.979844	-1.73813	0.00101194	0.0314318	0.999874	0.0626724	0.998971	1.62333	0.0045923	1.47401	0.218047	221.632	115.208	66.1791	35.5977	153.851	169.686	162.673	88.9593	41.6031	59.8771
proteinId316293	PCON_02567	SMAC_08351	-5.52904	2.05951e-33	-0.0166752	0.983377	1.81284	6.81218e-11	0.0597823	0.999874	0.244448	0.998971	0.0339434	0.928754	-0.629821	0.494199	103.453	54.9411	1.15013	154.407	56.8908	61.5681	67.0582	18.017	35.9491	18.6238
proteinId316299	PCON_01332	SMAC_06224	1.06133	0.0044311	0.814706	0.067492	-1.16355	0.000517714	0.445446	0.958433	0.342658	0.998971	-1.53499	4.77822e-05	-0.403446	0.762972	17.6965	16.6665	20.9341	10.1104	38.7154	31.9394	37.2797	13.1457	20.4468	3.82306
proteinId316315	PCON_07693	SMAC_00796	-5.33441	2.226e-10	-0.183641	0.91837	0.93563	0.269058	-0.242515	0.999874	-0.407822	0.998971	1.08302	0.225336	0.113098	0.983287	100.475	47.0759	1.12974	90.2996	49.0612	65.9758	45.0315	7.89523	9.23202	8.78852
proteinId316319	PCON_14035	SMAC_02783	-2.19603	NA	-0.43369	NA	1.89744	NA	-0.0234046	NA	0.288113	NA	0.168645	NA	-0.479591	NA	39.147	15.3601	4.65516	207.495	66.4792	76.2311	85.8327	61.2254	113.554	67.9263
proteinId316332	PCON_06798	SMAC_05366	0.125061	0.843491	-0.19735	0.851514	1.5219	0.00178987	0.0740285	0.999874	-0.100499	0.998971	-0.654761	0.244064	0.457264	0.810127	36.0833	16.7664	22.2788	52.7604	23.5135	25.1931	21.499	50.0013	45.8251	13.6551
proteinId316354	PCON_08374	SMAC_01924	-0.457161	NA	0.187693	NA	3.45364	NA	-0.0142998	NA	0.193014	NA	0.0117281	NA	-0.345144	NA	243.055	149.556	100.034	823.366	89.3052	101.635	107.262	111.512	176.965	99.3453
proteinId316365	PCON_09233	SMAC_04899	1.59111	5.80945e-07	0.240854	0.652956	3.8483	1.33902e-43	-0.23758	0.999874	-0.191046	0.998971	2.73591	7.25728e-19	0.0710518	0.970641	140.964	89.7164	243.754	2060.72	149.323	198.738	159.937	87.1495	106.137	369.303
proteinId316376	PCON_05682	SMAC_02696	1.2043	0.00464882	1.00198	0.0451333	-0.788874	0.0521171	0.3861	0.999874	0.225561	0.998971	-0.363073	0.426177	-0.65587	0.623112	38.6817	41.6873	51.0105	11.7114	32.8705	28.294	30.3003	31.2489	65.3591	24.0167
proteinId316474	PCON_12534	SMAC_00095	-0.409616	0.663923	0.856243	0.476976	-3.11251	3.23867e-05	0.224627	0.999874	0.107611	0.998971	-0.243712	0.796968	-0.787784	0.788469	128.695	127.991	54.0599	13.8618	189.38	181.542	179.902	76.2573	165.182	82.0896
proteinId316485	PCON_02489	SMAC_04919	-0.269225	0.752888	1.01866	0.310334	-0.333269	0.684002	0.130433	0.999874	-0.0508172	0.998971	-1.19685	0.117808	0.90246	0.710898	22.338	24.6662	10.3269	15.4321	26.5578	27.271	24.1303	44.9568	28.2234	5.60453
proteinId316503	PCON_06651	SMAC_00513	-3.27774	3.81482e-10	-0.1883	0.846347	0.329779	0.534942	0.284519	0.999874	0.027273	0.998971	-1.62385	0.000909388	-0.518477	0.762972	57.5028	27.0497	3.24407	28.3825	34.201	31.5736	29.521	35.4637	68.4599	11.0786
proteinId316505	PCON_03759	SMAC_06533	2.64957	3.15995e-08	-0.000149875	0.999734	1.77261	6.79063e-05	0.0965325	0.999874	-0.147525	0.998971	-0.902298	0.0736754	-0.287383	0.87674	94.2195	50.4719	344.031	454.484	175.198	184.272	152.735	109.923	172.303	49.2445
proteinId316513	PCON_05317	SMAC_04076	1.3278	0.0200413	1.42251	0.0299182	-0.80856	0.148092	-1.04829	0.450275	-0.177993	0.998971	-0.0707053	0.918466	-0.0108379	0.99544	41.8709	61.849	60.9327	8.87285	9.40088	22.3026	18.0884	11.6409	15.3585	6.71308
proteinId316516	PCON_13646	SMAC_03420	1.14582	0.0284027	0.530367	0.477644	2.8155	5.7023e-10	0.402038	0.999874	0.343347	0.998971	1.84942	0.000218655	0.614144	0.720405	904.875	714.822	1160.49	275.245	62.4722	53.0675	62.0974	271.931	227.701	422.331
proteinId316534	PCON_03649	SMAC_03493	0.408168	0.136269	0.0370144	0.950879	-1.32792	9.86794e-09	0.128335	0.999874	0.123097	0.998971	0.925741	0.000316333	0.437826	0.578155	78.6131	43.1107	58.9659	31.8182	108.933	112.273	112.173	37.7592	35.0936	34.2762
proteinId316545	PCON_12744	SMAC_08296	-1.26977	0.000175321	0.127281	0.839516	-0.978526	0.00134692	-0.149914	0.999874	0.239363	0.998971	1.7204	1.83387e-08	0.286343	0.8059	14.8109	8.66222	3.45277	3.91735	8.6507	10.8369	11.7363	19.5257	20.282	34.6304
proteinId316578	PCON_11329	SMAC_05435	0.507484	0.326103	0.0116504	0.994272	-0.115623	0.831927	0.121211	0.999874	0.122728	0.998971	2.5454	2.60448e-08	-0.393475	0.815692	135.955	73.4108	109.728	88.4418	129.292	133.816	133.793	64.2	98.8062	322.342
proteinId316605	PCON_11361	SMAC_06242	-0.182677	0.748176	0.268345	0.763014	-2.50196	1.49973e-08	-0.389692	0.999874	-0.18972	0.998971	0.76752	0.133828	-0.152699	0.952957	342.128	220.473	170.06	31.1972	169.784	251.954	202.096	167.086	227.102	217.498
proteinId316628	PCON_12967	SMAC_02182	2.74003	1.71038e-10	0.576554	0.353939	0.392014	0.398504	0.523352	0.990463	0.7013	0.698661	1.15218	0.00892424	-1.23999	0.147941	20.293	16.1469	78.5195	18.8073	25.426	19.8491	29.8656	11.364	31.5777	38.6782
proteinId316704	PCON_05208	SMAC_05032	-0.389287	NA	-0.631499	NA	-1.91589	NA	1.03901	NA	1.49319	NA	-0.900871	NA	-0.331701	NA	1413.91	485.594	612.339	21.6836	220.528	117.747	315.933	578.51	1011.91	282.692
proteinId316737	PCON_02319	SMAC_01847	-0.283845	0.400703	0.720281	0.048716	2.76007	3.60091e-25	0.172207	0.999874	-0.117406	0.998971	0.765948	0.0130418	0.587636	0.502174	231.24	205.054	107.223	468.861	96.401	96.2896	81.4555	116.509	93.9969	82.5039
proteinId316758	PCON_03332	SMAC_01337	0.703155	0.521256	-1.71026	0.173711	0.230223	0.838487	0.0369614	0.999874	0.119084	0.998971	0.28994	0.796783	1.37139	0.662986	41.8571	6.2316	39.6208	49.5898	53.364	58.5126	58.6405	98.5509	44.2898	24.2829
proteinId316775	PCON_09959	SMAC_01842	-1.78095	0.029511	0.704621	0.557652	-1.55516	0.0380563	0.44637	0.999874	-0.152959	0.998971	-4.02795	2.13591e-07	0.31817	0.926272	16.5808	14.8184	2.57785	5.25326	27.4926	22.4406	18.435	49.8065	50.6963	1.22564
proteinId316778	PCON_09836	SMAC_02945	-0.435358	0.707306	-0.0875054	0.971482	0.366641	0.745499	0.178814	0.999874	0.0501768	0.998971	4.68783	1.63076e-06	0.974964	0.787054	244.803	123.911	100.465	90.944	99.7149	98.2156	93.9226	25.3482	15.3836	224.587
proteinId316792	PCON_06949	SMAC_06512	1.61011	7.71987e-06	-0.631068	0.186971	-1.38152	6.59356e-05	0.0695686	0.999874	-0.0570419	0.998971	1.37847	0.00011092	0.513166	0.662986	162.594	55.9161	283.52	14.8209	50.8388	54.568	48.1242	347.586	302.106	419.28
proteinId316843	PCON_11646	SMAC_02624	-1.12714	0.0235205	1.48595	0.00670491	-0.75447	0.111205	0.197437	0.999874	0.401438	0.998971	-2.29406	1.45172e-06	0.382957	0.827323	189.456	292.833	48.9383	31.5616	76.4778	75.108	91.4123	101.349	90.5503	9.45934
proteinId316896	PCON_03541	SMAC_07064	-0.0180768	0.975142	-0.126088	0.885258	-0.861059	0.030229	-0.233638	0.999874	-0.595172	0.824777	0.205736	0.667105	-0.362501	0.811713	28.8697	14.2068	16.2434	22.7953	43.7331	58.0528	35.1084	16.4042	25.4757	14.7758
proteinId316909	PCON_05438	SMAC_00993	0.0717331	0.915737	0.226852	0.831956	-0.94077	0.0753164	-0.0657576	0.999874	-0.278662	0.998971	0.560257	0.34043	0.744853	0.667657	69.3852	43.4272	41.2009	33.8033	77.6833	91.6971	69.0208	60.2364	43.8158	30.9876
proteinId316910	PCON_05439	SMAC_00994	0.115569	0.885862	0.0067556	0.996896	1.32257	0.0348342	-0.0856805	0.999874	0.0556986	0.998971	-2.19309	0.000924256	-0.244439	0.937394	313.469	169.126	192.998	641.976	295.435	354.483	338.806	79.6839	125.958	14.4114
proteinId316958	PCON_02184	SMAC_05564	-0.326141	0.523902	1.18513	0.0252674	0.26182	0.888225	0.46837	0.999874	0.185931	0.998971	0.548602	0.254776	-0.320983	0.843798	136.893	169.67	62.05	0	0	0	0	48.2498	74.0571	57.1886
proteinId316971	PCON_11889	SMAC_03098	-1.08396	0.00967272	-0.348248	0.588315	1.40773	0.000138455	0.0249517	0.999874	0.0147206	0.998971	0.071786	0.882764	0.349088	0.813004	41.1197	17.2102	10.8292	113.832	54.1468	60.025	55.5909	17.1852	15.366	8.37298
proteinId316983	PCON_05356	SMAC_07167	-0.56648	0.350656	0.0796137	0.950879	1.38798	0.00725848	-0.130306	0.999874	-0.263166	0.998971	-1.79023	0.00675738	-0.382404	0.858488	332.358	189.465	126.295	146.847	63.1031	78.0085	59.5469	4.64003	7.05531	1.19251
proteinId316988	PCON_10759	SMAC_00212	1.33736	0.0743299	0.0632659	0.97116	1.09159	0.119884	1.90532	0.0824354	1.31716	0.469528	2.39393	0.000721118	1.3599	0.504614	99.6505	56.2683	148.658	178.234	398.823	114.499	270.456	470.126	236.835	725.724
proteinId317054	PCON_05636	SMAC_07798	-0.499309	0.211561	0.755594	0.0913404	0.0337071	0.93456	0.806983	0.222968	0.552482	0.736001	0.608971	0.103698	-0.345447	0.790398	19.7412	17.8854	7.8333	44.9909	95.6776	61.4158	82.9534	18.9855	30.7134	22.9666
proteinId317083	PCON_08803	SMAC_02634	0.76075	0.241689	-0.962148	0.234024	0.303905	0.646969	0.650607	0.999874	0.291924	0.998971	0.82049	0.200995	0.650871	0.762972	26.5197	7.12817	25.861	13.6444	21.6972	15.4316	17.3901	10.3529	8.19174	6.80538
proteinId317110	PCON_01244	SMAC_01247	0.289316	0.608039	-1.45511	0.0104206	3.79151	4.54598e-18	1.98188	0.000625419	1.70269	0.00622652	-0.000959502	0.99873	0.0162063	0.995399	93.0023	17.8341	64.3986	100.074	34.7106	9.67747	29.542	5.85985	7.16318	3.34993
proteinId317129	PCON_08488	SMAC_08493	2.61468	0.000299539	0.490068	0.690912	-3.54996	1.00524e-06	-0.468643	0.999874	-1.06342	0.80403	-0.045029	0.95912	1.13344	0.618116	13.1439	9.99576	48.9938	0.888669	12.4427	19.6936	8.41262	87.9626	49.3651	22.3165
proteinId317136	PCON_08596	SMAC_02892	0.476976	0.644493	0.479815	0.769735	-1.02405	0.266241	-0.115542	0.999874	-0.0064672	0.998971	0.395255	0.701308	1.9006	0.431722	156.001	119.142	125.894	19.6243	46.0439	56.6483	51.6599	327.732	104.034	81.9178
proteinId317139	PCON_05603	SMAC_03786	1.85485	0.00507968	0.810522	0.377785	0.828119	0.202398	0.474616	0.999874	0.552876	0.998971	1.32294	0.0469489	-0.492042	0.835216	197.225	188.162	416.861	222.642	216.37	174.009	236.71	58.8841	108.537	155.831
proteinId317154	PCON_08625	SMAC_04488	1.39139	0.0828137	1.79698	0.0501321	0.44299	0.595166	0.14423	0.999874	0.23082	0.998971	-2.11642	0.00616372	2.40515	0.0701264	108.956	214.841	170.172	75.4166	74.866	76.0506	82.5274	482.47	122.228	13.5651
proteinId317159	PCON_08841	SMAC_00331	2.0283	0.00891299	-0.586309	0.636635	-3.81862	9.31669e-08	-0.10553	0.999874	-0.16078	0.998971	-6.76597	2.84452e-16	1.1211	0.641507	37.4103	13.122	90.7867	1.295	22.8963	27.8609	22.7186	100.161	52.6475	0.166516
proteinId317196	PCON_11648	SMAC_07044	0.294022	0.623276	2.24581	5.46774e-05	-0.63659	0.228237	-0.546051	0.999874	-0.41266	0.998971	0.802215	0.140815	1.03045	0.494199	89.3839	233.087	62.3604	14.5473	19.137	31.7825	21.7594	112.029	59.6735	55.8569
proteinId317236	PCON_13393	SMAC_03426	-0.214864	0.636306	-0.271515	0.682376	-1.97456	2.71427e-08	-0.112372	0.999874	-0.145546	0.998971	0.494523	0.238171	-0.267663	0.848715	217.973	96.282	106.269	44.573	203.793	248.663	205.964	87.0882	124.894	94.8135
proteinId317239	PCON_03561	SMAC_02371	1.20765	0.0879204	0.0678392	0.969184	-1.26675	0.0501317	0.042227	0.999874	0.036745	0.998971	-0.303375	0.694668	0.566694	0.813611	14.9337	8.42556	20.0838	10.5608	33.4227	36.5438	34.4257	30.6602	24.7646	9.32275
proteinId317247	PCON_09224	SMAC_03609	-0.252081	0.706929	0.43712	0.642072	0.246634	0.898924	0.452393	0.999874	0.180064	0.998971	1.27763	0.0307005	0.122434	0.971541	85.3439	62.5185	40.7617	0	0	0	0	16.3642	17.7215	21.8792
proteinId317252	PCON_02334	SMAC_04008	-0.329328	0.425755	0.0957048	0.90209	-0.822482	0.0190638	0.0155998	0.999874	0.0368421	0.998971	-1.3099	0.000385103	-0.256108	0.84651	153.695	87.8196	68.9358	63.4711	141.72	157.951	148.557	75.7964	106.592	22.5156
proteinId317263	PCON_06564	SMAC_02710	0.276528	0.536406	1.25913	0.00458094	-0.333661	0.428248	-0.335851	0.999874	-0.0782538	0.998971	-0.606654	0.148381	-0.593175	0.638121	156.404	203.23	107.905	37.4808	46.009	65.7257	56.9881	21.6726	40.6366	14.3019
proteinId317273	PCON_03650	SMAC_03036	0.974927	0.119216	-0.689844	0.417294	-3.0022	1.76502e-08	-0.247483	0.999874	0.515231	0.998971	-1.80417	0.00234425	0.506988	0.812864	155.444	50.5165	175.151	21.2347	185.456	249.236	329.321	71.713	65.3514	9.85175
proteinId317280	PCON_02481	SMAC_05805	-1.9134	0.000669833	0.417044	0.645091	1.61494	0.00155603	0.0652843	0.999874	0.0970232	0.998971	0.962736	0.0930092	0.323483	0.878565	68.1999	49.1596	10.001	190.676	79.3779	85.4706	84.0873	51.7699	48.3467	46.6922
proteinId317291	PCON_07453	SMAC_03278	0.782816	0.057779	0.8439	0.081504	0.34982	0.394706	0.960421	0.141606	0.437217	0.998971	1.66675	1.73462e-05	-0.0944574	0.966859	30.5912	29.8135	30.256	29.0934	55.5692	32.0046	39.9496	16.1434	19.9012	34.2735
proteinId317311	PCON_01270	SMAC_05996	1.46999	0.00233906	0.137931	0.887509	2.05272	1.77567e-06	0.211031	0.999874	-0.00195218	0.998971	-2.08424	4.44484e-05	-1.27176	0.222748	83.7327	49.52	133.548	485.268	166.343	161.711	148.233	5.19764	15.6227	2.04024
proteinId317318	PCON_13544	SMAC_08443	0.382248	0.435873	-1.2962	0.0117156	-0.937875	0.027683	0.0285009	0.999874	-0.432551	0.998971	-2.62342	9.80724e-08	0.820906	0.523074	92.8371	20.136	69.3495	18.0953	43.5516	48.1047	32.5918	27.9133	17.3916	1.48851
proteinId317359	PCON_09525	SMAC_02159	-1.52029	0.00765445	-0.404386	0.655324	0.741071	0.169126	-0.810049	0.773486	-0.824833	0.769508	0.205481	0.74788	0.254953	0.913679	29.2389	11.7922	5.63806	67.5791	28.1344	56.3058	28.8035	17.7311	17.8317	9.84013
proteinId317366	PCON_06289	SMAC_00451	-1.61722	0.0431948	-0.426728	0.758854	-3.22603	5.55042e-06	-0.468879	0.999874	0.100507	0.998971	-0.490695	0.566857	1.83899	0.30269	94.0787	37.1837	16.6268	4.87146	42.9613	68.0244	67.2109	190.403	64.8455	26.0979
proteinId317405	PCON_02660	SMAC_00487	0.881587	0.170099	0.25203	0.830001	-3.0969	5.56895e-08	0.0585721	0.999874	0.205018	0.998971	1.10019	0.0815276	-0.259671	0.923113	267.85	172.707	283.967	5.21005	61.529	66.5902	70.6138	18.2569	32.8856	35.3513
proteinId317432	PCON_11338	SMAC_08090	1.30407	NA	-0.0787831	NA	5.06383	NA	-0.0572223	NA	0.625002	NA	-0.504087	NA	0.393217	NA	65.4978	33.3974	96.8421	601.778	19.4503	22.8731	32.9632	2.24798	2.93351	0.586802
proteinId317449	PCON_01870	SMAC_02358	0.364521	0.674701	-0.209231	0.892395	0.506857	0.528479	0.0120105	0.999874	-0.304625	0.998971	-4.08359	2.67171e-08	1.0351	0.667404	21.7045	9.99182	15.7678	38.3099	33.5946	37.4944	27.6735	145.135	84.922	2.06103
proteinId317460	PCON_03097	SMAC_06053	-0.773933	0.256319	0.487951	0.633288	0.407046	0.545976	-0.0196614	0.999874	0.289581	0.998971	0.468897	0.498852	-0.573876	0.8059	339.688	257.675	110.56	168.457	153.644	175.869	198.337	51.7612	100.489	78.3389
proteinId317528	PCON_11972	SMAC_00898	1.09661	0.0446249	0.458975	0.578953	-1.46435	0.00305813	0.731729	0.848113	0.547705	0.998971	0.388158	0.502082	-0.434712	0.816712	27.4598	20.2227	33.2392	10.0341	57.8218	38.9147	52.5894	34.5914	57.2729	40.6981
proteinId317560	PCON_09657	SMAC_00656	-2.68762	0.000200711	1.21329	0.19967	-0.634147	0.402606	0.0873666	0.999874	0.209906	0.998971	-0.680102	0.384284	0.919059	0.695636	425.458	547.06	35.1746	48.7732	101.113	107.12	114.243	406.446	275.028	93.4693
proteinId317563	PCON_10581	SMAC_00725	1.22941	0.0563722	-0.889254	0.294806	0.323041	0.634307	0.20922	0.999874	0.505475	0.998971	-3.77229	3.69685e-10	0.590021	0.788832	24.6027	6.97839	33.3828	19.1127	21.8043	21.225	27.8589	143.047	116.509	3.70642
proteinId317600	PCON_13833	SMAC_04582	-0.316655	0.626879	-0.104919	0.933414	-1.13302	0.0364925	-0.570954	0.999874	-0.206982	0.998971	0.918807	0.119941	0.445503	0.829185	600.356	299.733	272.109	79.1357	145.533	246.11	194.868	243.649	243.76	245.118
proteinId317624	PCON_13489	SMAC_04567	-0.593564	0.32029	0.105015	0.928099	-1.09442	0.0332609	-0.0250464	0.999874	-0.322806	0.998971	-0.410678	0.490253	0.577808	0.762972	16.0526	9.19948	5.89588	16.8825	44.6423	51.1994	37.3996	44.2416	33.5195	12.8786
proteinId317639	PCON_13300	SMAC_04042	-0.875286	0.0347297	-0.659838	0.206953	0.4478	0.253577	-0.0610919	0.999874	0.0672159	0.998971	-4.35122	6.62119e-15	-0.358332	0.809329	18.4763	6.24772	5.67266	29.9578	26.1947	30.8094	29.6486	5.27855	7.85971	0.176733
proteinId317655	PCON_09169	SMAC_04881	1.009	0.00892412	0.0774255	0.925352	0.877001	0.0132547	0.00612421	0.999874	-0.107987	0.998971	-1.01822	0.0080913	-1.139	0.103772	251.549	142.853	288.393	259.644	176.38	198.108	168.694	30.3246	82.0149	21.4899
proteinId317663	PCON_13090	SMAC_09463	-0.793708	0.082897	0.00657273	0.996377	0.686159	0.106106	0.0796483	0.999874	-0.0341106	0.998971	1.14501	0.00921546	-0.31343	0.843056	303.613	163.78	98.5842	207.005	168.335	179.397	160.826	39.3025	56.8983	70.7716
proteinId317794	PCON_06993	SMAC_07257	1.41768	0.00822966	-0.123837	0.914647	-0.465621	0.394627	-0.527748	0.999874	0.1386	0.998971	-5.23575	2.04015e-19	-0.0899223	0.977013	15.123	7.37937	23.3097	17.203	20.4293	33.4143	33.8391	26.5206	35.7473	0.464591
proteinId317808	PCON_07860	SMAC_03804	1.47005	0.014712	0.914082	0.246928	0.0623602	0.927034	0.945165	0.663196	0.851548	0.809042	1.98582	0.000636888	0.55381	0.796573	60.6161	62.262	97.702	32.6026	75.3615	43.4728	73.0036	67.0963	57.9416	109.412
proteinId317814	PCON_08189	SMAC_09042	-0.285555	0.610478	-0.0831434	0.938688	0.449659	0.374629	-0.372238	0.999874	-0.406469	0.998971	-0.592753	0.253588	0.343248	0.843798	39.0949	19.7185	18.1437	18.9015	13.1749	19.308	13.2918	34.4294	38.3131	11.7751
proteinId317838	PCON_04121	SMAC_05013	0.280952	0.671857	-0.207636	0.856142	0.193037	0.76658	-0.607188	0.999874	-0.0626615	0.998971	-2.42662	1.94501e-05	0.39833	0.84651	524.044	242.855	362.457	213.598	151.551	263.134	230.774	142.563	145.045	13.7562
proteinId317854	PCON_11404	SMAC_02511	2.1455	0.0029814	3.15185	3.43135e-05	1.77425	0.00774152	-1.61506	0.22007	-0.724214	0.998971	1.88286	0.00847299	0.548764	0.830072	63.5849	329.888	169.251	1382.54	152.955	549.588	301.45	131.289	104.475	200.579
proteinId317882	PCON_08423	SMAC_05869	-3.21282	0.000118186	-0.146179	0.937379	2.20341	0.00498235	-0.959204	0.999874	3.57046	0.000178136	-0.370416	0.698859	0.372012	0.919443	202.268	94.2274	10.8997	26.8975	3.2464	7.41857	92.2078	71.1319	63.2593	27.5022
proteinId317885	PCON_04172	SMAC_00877	-1.99906	0.0474759	-0.210779	0.919108	1.17598	0.228988	-0.51847	0.999874	-0.292057	0.998971	-3.43491	0.000318849	-0.485255	0.905437	63.0584	28.7868	8.02402	40.9236	14.7785	24.5414	18.1016	150.379	266.092	12.375
proteinId317948	PCON_04156	SMAC_01088	2.41186	0.00515945	-0.498211	0.743499	-4.28908	3.3268e-08	-0.112383	0.999874	-0.466997	0.998971	-5.18013	5.40438e-09	0.185258	0.970749	8.25589	3.08218	26.9463	0.876172	22.4366	27.4198	17.9072	8.36215	9.15399	0.0865432
proteinId318019	PCON_02583	SMAC_03666	1.20241	0.0358415	0.668467	0.397896	0.857637	0.113469	0.247598	0.999874	0.615267	0.998971	0.0271514	0.968074	-0.46637	0.813611	62.5373	53.7608	82.8444	100.529	80.8525	76.5094	108.677	74.9573	125.762	72.3192
proteinId318069	PCON_05898	SMAC_02230	0.82643	0.391053	-0.712205	0.610545	0.471701	0.622867	-0.0975168	0.999874	-0.411207	0.998971	-7.32909	2.51526e-16	1.62092	0.51451	26.0817	8.40922	27.3336	45.0294	37.7467	45.6186	30.9999	134.529	50.9581	0.0928808
proteinId318094	PCON_02330	SMAC_06482	0.827485	0.310702	1.18773	0.233271	-1.96718	0.0049609	-0.0709611	0.999874	-0.423597	0.998971	-3.58403	8.01932e-07	1.42953	0.502174	8.02356	10.0192	8.12686	2.50599	11.8942	14.0965	9.51289	205.235	86.0984	3.15669
proteinId318117	PCON_04120	SMAC_01357	1.34482	0.149315	-5.29356	2.13673e-08	1.33947	0.120522	1.7325	0.373544	0.688476	0.998971	-2.41088	0.00704833	-0.297205	0.945665	45.2212	0.478386	69.0813	28.7629	48.8947	15.512	23.6045	11.4616	17.7724	1.36467
proteinId318138	PCON_13141	SMAC_00952	-0.76296	0.370484	1.08279	0.305916	1.74215	0.0174931	0.0737593	0.999874	1.0989	0.836116	-6.76025	7.35737e-19	0.458241	0.875612	562.604	663.439	185.115	278.947	105.527	112.777	229.495	381.086	343.776	1.42204
proteinId318232	PCON_01103	SMAC_01774	-0.478597	0.233249	-0.0952312	0.90248	-3.86103	2.21624e-32	-0.557858	0.751537	-0.492814	0.908987	-2.14555	3.09189e-09	0.393588	0.762972	263.843	132.179	106.7	13.6614	170.651	284.186	184.687	128.051	122.174	14.5475
proteinId318258	PCON_10817	SMAC_02458	1.98334	0.00544273	3.00937	6.20973e-05	-0.705691	0.328716	0.749299	0.999874	0.522799	0.998971	1.01931	0.165656	0.364973	0.902403	1603.21	7404.01	3756.95	284.584	990.405	652.461	871.713	2489.85	2555.22	2926.9
proteinId318270	PCON_09149	SMAC_04969	1.66385	0.0530781	-0.695377	0.59689	1.14761	0.162818	-0.896205	0.999874	-0.248476	0.998971	-6.01318	3.91413e-09	-0.0487604	0.994019	47.0966	15.3587	89.9182	24.1513	6.90324	14.9974	11.468	18.7399	24.4873	0.0801651
proteinId318285	PCON_07431	SMAC_07888	0.0566056	0.963892	0.134422	0.95028	1.18183	0.204092	1.95139	0.307329	0.617009	0.998971	-2.70663	0.00430108	1.3336	0.655856	438.679	262.439	264.284	553.586	1256.15	337.621	489.597	44.6687	20.4154	1.16015
proteinId318295	PCON_09372	SMAC_06422	1.14382	0.00313682	0.732139	0.129912	-0.998251	0.00838023	-0.00729122	0.999874	-0.448687	0.998971	1.1984	0.00171103	0.0345595	0.990212	97.966	88.0415	124.812	5.45327	13.7642	15.6108	10.4483	29.7757	36.6582	43.4586
proteinId318351	PCON_12160	SMAC_07557	0.213173	0.697736	0.21429	0.81126	0.661227	0.157113	0.253181	0.999874	0.427313	0.998971	-0.168781	0.763878	-0.413498	0.812864	148.86	92.7609	98.1554	73.1166	68.3425	64.5286	80.0189	17.509	31.0131	14.6055
proteinId318370	PCON_02345	SMAC_02772	2.23788	0.0290363	-0.0833572	0.972448	0.397017	0.721447	0.172386	0.999874	-0.208839	0.998971	-1.50824	0.146519	0.816673	0.818694	13.0093	6.56982	39.188	11.8574	12.4284	12.3198	9.65483	102.985	71.5965	10.2017
proteinId318442	PCON_10593	SMAC_00949	1.64539	0.0243877	-1.53482	0.0781745	-2.16755	0.00100513	-0.490047	0.999874	-0.65657	0.998971	-3.7734	5.77281e-08	0.667933	0.796573	23.7534	4.20184	43.6302	3.92693	15.9985	25.6187	14.6526	53.294	42.3716	1.27542
proteinId318478	PCON_08229	SMAC_04285	3.19207	NA	-0.78677	NA	1.33826	NA	0.23089	NA	0.415428	NA	3.30982	NA	-0.00106691	NA	189.693	58.6759	1049.26	299.843	172.648	164.85	204.034	72.842	102.361	523.886
proteinId318500	PCON_09804	SMAC_04851	1.17397	0.057009	1.56296	0.0245372	2.10816	9.78678e-05	-1.11886	0.432655	-1.21469	0.320896	-1.04009	0.088991	-0.531876	0.8059	437.569	712.592	569.212	1305.74	164.081	409.646	158.736	367.315	628.008	173.51
proteinId318508	PCON_03071	SMAC_04602	0.0182355	0.973202	-0.46914	0.403157	-0.704527	0.059343	-0.133121	0.999874	-0.307475	0.998971	-1.41747	0.000284758	-0.712952	0.523074	15.7565	6.0856	8.97277	12.7529	23.6094	29.2179	21.588	11.1514	23.9802	4.41366
proteinId318527	PCON_10717	SMAC_01133	1.44611	NA	0.179305	NA	0.868957	NA	0.179056	NA	-0.154909	NA	0.504175	NA	0.742099	NA	41.3812	25.3207	65.9836	51.6826	40.0373	39.6592	32.6612	66.7887	46.1252	32.5907
proteinId318548	PCON_13137	SMAC_04189	0.572276	0.325597	-0.128822	0.910228	-1.57033	0.00142781	-0.227	0.999874	-0.303998	0.998971	-1.24212	0.0217406	-0.237011	0.919845	95.5208	46.7464	81.0516	29.6465	94.464	124.954	92.5951	42.498	55.375	13.2721
proteinId318559	PCON_13746	SMAC_06547	1.14509	0.0326504	0.70265	0.325996	4.07661	4.02787e-19	-0.00203546	0.999874	-0.125496	0.998971	0.044731	0.942772	-0.467146	0.8059	37.9402	33.4209	48.0085	164.343	11.6338	13.1397	11.0746	16.2385	27.2719	15.3261
proteinId318612	PCON_09163	SMAC_04280	1.09981	0.167146	0.83825	0.436162	-2.28809	0.000904244	-0.392185	0.999874	-0.638217	0.998971	0.66224	0.414209	0.600063	0.822807	130.62	127.947	164.392	27.6496	131.644	196.854	114.092	525.06	459.234	407.859
proteinId318662	PCON_08283	SMAC_05174	-5.99134	9.22925e-12	-0.726903	0.513257	-0.492115	0.536259	-0.413033	0.999874	-0.491261	0.998971	-1.22255	0.1131	0.566704	0.830072	31.7357	10.0096	0.198853	10.9651	14.3605	21.785	14.0589	37.9088	31.6176	5.96329
proteinId318707	PCON_10881	SMAC_05528	0.683428	0.484246	1.29761	0.269243	1.44084	0.0897435	0.409442	0.999874	0.0250373	0.998971	1.74839	0.0496262	-0.626655	0.841927	150.381	207.178	139.747	361.682	213.323	178.253	166.697	53.4525	106.809	226.714
proteinId318721	PCON_14345	SMAC_09205	3.18594	0.00053622	-3.71741	0.000467246	-1.58707	0.0744434	0.484425	0.999874	0.194751	0.998971	-3.1436	0.000639847	-0.353797	0.930969	3.3465	0.101319	20.1099	46.7759	271.133	214.475	226.887	6.29766	9.59344	0.424484
proteinId318748	PCON_02206	SMAC_07519	3.37323	NA	-2.68952	NA	3.35201	NA	2.55047	NA	0.824736	NA	4.97362	NA	2.19515	NA	1478.43	106.239	9965.71	179.063	122.718	20.1639	34.6783	83.1094	23.8787	460.552
proteinId318817	PCON_02079	SMAC_02569	3.1096	1.03285e-06	0.329098	0.78312	0.544812	0.420993	0.238111	0.999874	0.187472	0.998971	2.5039	8.24442e-05	0.569535	0.810127	258.244	174.638	1341.39	124.823	123.246	117.092	123.05	183.553	166.374	528.642
proteinId318855	PCON_09746	SMAC_05067	1.40348	NA	-0.0732503	NA	2.53203	NA	0.208552	NA	-1.5181	NA	1.18044	NA	1.14793	NA	55.0568	27.8158	89.8965	43.2473	9.37203	9.01047	2.55077	85.4992	48.1519	53.4881
proteinId318888	PCON_12883	SMAC_12614	-0.167955	0.853538	-1.12161	0.271669	0.739654	0.344229	-0.211942	0.999874	-0.514282	0.998971	0.522436	0.532643	0.628847	0.815692	78.0611	18.4945	38.8419	116.601	73.1958	96.1345	60.8997	59.1715	45.7597	30.6452
proteinId318941	PCON_02845	SMAC_01730	-3.40019	NA	1.1678	NA	0.280397	NA	-0.0550407	NA	-0.110471	NA	-0.115869	NA	0.317553	NA	18.1607	22.1144	0.934915	82.5619	81.7818	95.8689	81.3929	11.2904	11.9093	5.63467
proteinId318972	PCON_12558	SMAC_06340	-4.05446	2.20492e-17	0.497695	0.463698	-1.16971	0.0075117	0.665532	0.806454	0.714764	0.745619	-3.84814	1.06429e-17	-0.592744	0.693528	77.8381	59.07	2.52106	11.8209	53.0721	37.4863	56.8204	129.013	233.353	8.59187
proteinId318982	PCON_13658	SMAC_00822	0.672757	0.248001	-0.432233	0.617358	0.964599	0.063381	0.118329	0.999874	0.441671	0.998971	1.74986	0.00101452	-0.468542	0.810127	293.781	116.364	268.916	124.165	86.117	89.3321	112.099	179.128	306.856	556.272
proteinId319055	PCON_09023	SMAC_03116	-6.32129	9.68794e-13	3.25305	0.000190988	-0.636315	0.456797	-0.940097	0.999874	-0.453983	0.998971	1.89285	0.020179	0.34239	0.923113	207.507	1196.16	1.00246	87.2601	87.0109	194.772	128.349	78.4614	81.6775	177.359
proteinId319107	PCON_08315	SMAC_03311	-2.43042	0.00572418	-0.76961	0.566527	-0.598439	0.524679	-0.473583	0.999874	-0.160538	0.998971	0.163309	0.874856	0.641596	0.841038	169.202	53.5873	16.8363	4.0311	5.36636	8.55893	6.99554	9.0164	6.70371	3.5074
proteinId319109	PCON_01816	SMAC_03022	-2.54195	2.87459e-08	0.10862	0.907333	2.12486	5.34636e-08	0.123636	0.999874	-0.117549	0.998971	-0.540574	0.242319	0.0818948	0.975216	36.8024	21.2177	3.48984	86.1697	26.3709	27.2566	23.063	43.0278	45.368	17.0755
proteinId319114	PCON_01824	SMAC_01003	2.41639	5.41502e-06	0.3816	0.67136	0.113149	0.855636	0.227668	0.999874	-0.261197	0.998971	-1.89519	0.0003502	-1.03868	0.502174	35.0322	24.5835	109.276	227.192	307.169	294.498	225.146	112.67	262.306	39.4611
proteinId319130	PCON_05921	SMAC_08324	0.281979	NA	0.673632	NA	0.114642	NA	0.416424	NA	0.279846	NA	-0.269899	NA	-0.590233	NA	1842.12	1606.58	1284.42	1952.75	2989.93	2502.46	2811.18	629.32	1376.74	562.752
proteinId319137	PCON_05916	SMAC_06049	0.445792	0.452426	-1.05235	0.116679	-2.16327	8.37941e-06	0.306219	0.999874	0.127978	0.998971	0.394676	0.502726	0.623076	0.739217	69.2433	17.6639	53.7358	12.2961	86.3971	78.4347	78.8147	62.3471	48.464	30.9187
proteinId319274	PCON_12443	SMAC_03392	0.670232	0.257625	-0.961247	0.177037	-0.674353	0.216702	-0.0325508	0.999874	-0.302212	0.998971	0.781291	0.172163	0.0414113	0.99246	24.8367	6.7547	22.6028	20.3453	39.7517	45.8542	34.0146	25.6482	30.5963	25.3346
proteinId319280	PCON_12322	SMAC_02491	-3.38969	1.70336e-06	2.74014	0.000405987	-0.289234	0.715465	-0.499712	0.999874	0.527453	0.998971	-0.419366	0.597601	0.882549	0.700963	416.586	1593.91	20.6184	59.0442	62.3372	100.829	135.086	681.836	515.662	191.191
proteinId319285	PCON_12425	SMAC_04174	0.747734	0.295607	0.597651	0.554481	-4.38867	2.59201e-12	0.576463	0.999874	0.0389681	0.998971	-4.54445	7.00983e-11	0.170728	0.962728	14.4069	11.7546	13.8357	0.46654	19.6174	14.6489	13.8312	13.8536	14.8849	0.260283
proteinId319351	PCON_10853	SMAC_02279	-1.27173	0.000145912	0.256923	0.629834	2.49634	2.52867e-18	0.196959	0.999874	-0.100956	0.998971	0.871331	0.0133154	0.052757	0.981257	90.4303	58.2821	21.1914	130.595	32.618	32.0421	27.4598	9.54656	11.5003	10.2203
proteinId319396	PCON_13625	SMAC_02299	2.86068	6.78919e-07	-0.0541818	0.969894	0.322072	0.614354	-0.453439	0.999874	-0.433961	0.998971	3.33709	4.98255e-09	0.715744	0.72028	33.4755	17.536	147.082	65.0309	46.4344	72.2626	48.7084	13.7149	9.50659	55.6183
proteinId319405	PCON_10929	SMAC_04489	-5.64536	7.19563e-07	1.29271	0.111282	0.235985	0.908847	0.433492	0.999874	0.172813	0.998971	-0.293544	0.688504	1.4264	0.382738	14.1929	19.1691	0.0912115	0	0	0	0	67.7182	34.0351	13.6458
proteinId319478	PCON_10926	SMAC_02278	1.97622	4.57044e-07	-0.284931	0.678239	3.67706	2.62842e-27	-0.33925	0.999874	-0.0741052	0.998971	-0.597149	0.145203	-0.653679	0.578155	19.7538	8.67325	44.8903	494.639	37.3282	53.4027	46.4477	38.7725	74.7152	26.7404
proteinId319503	PCON_04013	SMAC_03145	2.97363	0.000361778	0.917587	0.448824	1.94047	0.0145558	-0.113348	0.999874	-0.0958359	0.998971	-1.84228	0.0340503	2.15494	0.218047	40.7094	42.7082	201.118	32.0014	8.87929	10.9096	9.32764	71.7408	21.8111	2.91331
proteinId319529	PCON_02024	SMAC_05839	1.0476	0.331459	-3.04867	0.00912835	2.03374	0.0328359	1.84818	0.447489	0.459005	0.998971	-7.52103	3.11434e-09	1.11575	0.757049	12.419	0.668237	15.0637	9.17156	10.0038	2.84054	3.65464	32.5109	18.2522	0
proteinId319573	PCON_04023	SMAC_05323	-1.23613	0.0028997	-0.198579	0.791634	-0.452703	0.266253	0.169627	0.999874	-0.16499	0.998971	-0.189989	0.678869	-0.756607	0.507799	22.6445	10.5833	5.43145	64.8699	124.821	124.792	102.042	43.1657	88.1673	41.9132
proteinId319603	PCON_06952	SMAC_08334	2.0694	0.0102532	-1.86989	0.0829756	3.99147	5.73952e-09	-1.85947	0.156766	2.984	0.000868821	1.709	0.0288797	0.105771	0.982421	3.35891	0.420861	8.40745	224.803	4.28004	18.5649	146.056	6.56029	7.69305	14.0507
proteinId319689	PCON_13945	SMAC_01984	3.69847	0.01169	-3.05132	0.0854525	-1.74549	0.235752	-8.79023	4.17876e-09	-8.60902	1.13444e-08	0.26847	0.874084	0.581416	0.927488	13.1184	0.400774	152.648	166.176	0.354507	1013.76	0.468223	238.86	198.389	140.05
proteinId319714	PCON_07055	SMAC_01812	0.0689533	0.921977	0.373048	0.702912	-0.135812	0.836796	0.164278	0.999874	0.219767	0.998971	0.8391	0.158506	0.560403	0.782175	372.369	259.389	220.953	130.49	199.499	200.397	214.997	341.596	286.905	288.762
proteinId319715	PCON_10065	SMAC_08348	-2.95089	4.22933e-10	0.0182866	0.988153	0.956104	0.0281145	0.102181	0.999874	0.285897	0.998971	0.597428	0.228306	-0.230272	0.909866	52.8327	28.7012	3.75455	71.2513	48.786	51.1582	57.541	9.77041	14.4947	11.734
proteinId319752	PCON_08199	SMAC_05959	0.796596	0.375759	2.17553	0.0230024	-0.627978	0.468141	0.0930406	0.999874	0.444467	0.998971	-0.0663741	0.946229	0.012942	0.99544	1693.13	4402.38	1714.82	278.172	573.129	604.079	765.714	973.595	1214.65	676.766
proteinId319787	PCON_05940	SMAC_05318	0.407763	0.414642	-0.0972716	0.919962	-1.54691	0.000184942	0.338141	0.999874	-0.314743	0.998971	-0.50747	0.294269	-0.0188336	0.994019	106.845	53.5176	80.8247	41.1257	190.899	169.538	124.846	50.0707	59.977	20.8477
proteinId319800	PCON_09059	SMAC_00555	-0.436286	0.56754	-1.14706	0.189842	1.62689	0.00953416	0.0723859	0.999874	-0.0495286	0.998971	0.56451	0.441168	-0.0313649	0.994019	145.967	34.5221	60.5716	345.417	144.755	154.928	137.411	75.6016	99.5363	83.3268
proteinId319872	PCON_08059	SMAC_07415	-1.55587	2.48447e-05	1.59466	2.56622e-05	1.43595	6.17062e-06	0.073943	0.999874	-0.0395406	0.998971	1.26553	0.000284973	0.0138043	0.994019	41.7097	68.0673	7.94859	458.896	220.886	236.663	211.284	51.3428	59.7082	76.2224
proteinId319947	PCON_10309	SMAC_04850	2.4624	2.85813e-05	-10.3604	3.23809e-47	1.30134	0.0205386	-0.358318	0.999874	-0.0534942	0.998971	1.12828	0.0638129	-0.5818	0.783125	474.616	0.115844	1527.45	346.266	133.614	194.728	171.75	374.376	608.208	734.392
proteinId319954	PCON_01245	SMAC_05243	-0.238033	0.820122	1.08357	0.39065	0.988392	0.276323	0.688158	0.999874	0.768028	0.998971	-3.92345	7.791e-06	0.709082	0.827323	112.984	134.37	53.928	40.665	40.4273	27.4825	44.4151	100.212	73.9108	2.44571
proteinId319971	PCON_08385	SMAC_05405	1.09928	0.016192	-0.404617	0.564878	0.0731552	0.885816	0.183269	0.999874	-0.467412	0.998971	-1.71853	0.000635848	0.895545	0.502174	15.0498	6.0623	18.4873	18.7898	25.3099	25.0711	16.5653	8.94262	6.10213	0.940077
proteinId320046	PCON_10336	SMAC_01867	4.67656	1.8988e-25	-0.552206	0.416587	-0.139746	0.789991	-0.60374	0.92122	-0.687697	0.79581	-3.24888	1.24592e-10	-0.444646	0.799532	19.5507	7.07669	294.11	46.689	41.8457	72.1937	40.8221	8.12847	14.9365	0.689434
proteinId320096	PCON_01835	SMAC_02037	0.67438	0.155526	0.394267	0.568843	-1.12239	0.00679858	0.460818	0.999874	0.174606	0.998971	-0.72487	0.115508	0.606836	0.667404	47.1262	33.2549	42.8059	31.0744	117.373	95.9155	99.2521	288.428	213.988	66.9489
proteinId320103	PCON_05436	SMAC_00995	-3.80094	1.51847e-07	-0.673982	0.497232	0.569286	0.414327	1.10303	0.611945	1.43349	0.254586	-3.60204	1.80396e-08	0.396087	0.870999	36.6502	12.1569	1.30519	18.441	33.2704	17.0749	43.7306	292.596	283.502	9.99499
proteinId320130	PCON_05440	SMAC_00879	-5.71472	7.77833e-23	0.169801	0.849621	0.350404	0.465612	-0.135828	0.999874	0.00959202	0.998971	0.234605	0.646938	0.650487	0.652331	69.2348	41.6729	0.636445	56.8799	50.3526	62.5329	57.8273	85.1522	70.9745	41.6461
proteinId320275	PCON_03518	SMAC_05601	1.36738	0.00329747	1.19967	0.0260064	-1.59402	0.000162129	0.574254	0.944101	0.672361	0.79581	-0.691242	0.149108	0.254764	0.890978	19.7864	24.661	29.4672	8.20117	46.3078	34.8974	51.1846	50.5616	49.819	15.5556
proteinId320314	PCON_08609	SMAC_02709	0.818806	0.425372	0.22697	0.90785	-0.927326	0.336816	0.291659	0.999874	-0.0463322	0.998971	-0.965585	0.330376	0.221741	0.966543	29.8996	18.7701	30.7979	4.07574	12.0717	10.9725	9.71058	39.5616	42.1193	9.23443
proteinId320323	PCON_09897	SMAC_05580	-0.964304	0.106006	0.359374	0.712742	1.31806	0.012918	0.515801	0.999874	-0.0567693	0.998971	-0.203746	0.755655	-0.0246838	0.994019	160.917	111.382	46.3396	368.263	262.19	204.992	180.994	223.644	276.237	114.026
proteinId320334	PCON_14135	SMAC_09464	1.77224	0.00114814	0.89229	0.212523	3.726	6.08147e-15	0.00451898	0.999874	0.308918	0.998971	3.08291	3.899e-09	-0.719583	0.678223	51.5338	52.2874	103.179	434.298	39.6062	44.5095	50.9021	16.2868	37.5868	171.855
proteinId320354	PCON_02419	SMAC_12073	-0.610933	0.164045	0.254777	0.719527	-1.58185	2.21982e-05	0.3645	0.999874	0.020022	0.998971	1.69852	2.99962e-05	-0.224642	0.89823	56.4549	36.2218	20.8808	17.2911	83.9028	73.2337	68.1769	8.10783	11.6871	18.4265
proteinId320428	PCON_03142	SMAC_00291	-0.00883059	0.993551	-5.85203	1.83302e-09	2.90703	0.000260047	0.0972967	0.999874	0.852581	0.998971	-0.600345	0.531821	-0.602927	0.84651	36.0648	0.233346	20.7188	47.1041	7.84014	8.24842	14.1459	13.1816	24.2222	8.34992
proteinId320486	PCON_14270	SMAC_03519	2.11805	0.00167046	0.752391	0.436162	2.09569	0.000642005	0.585793	0.999874	0.521282	0.998971	2.1594	0.00107615	-0.939957	0.664029	99.0701	90.0935	253.58	235.991	99.7953	74.0281	98.546	59.0306	164.301	397.055
proteinId320519	PCON_08384	SMAC_09079	-0.372643	0.462306	1.29811	0.010228	0.267489	0.566358	-0.195871	0.999874	-0.115044	0.998971	-0.672477	0.169679	0.144223	0.950145	16.9211	22.5573	7.39944	47.3624	42.7194	55.2581	46.7523	12.5197	15.6255	4.57892
proteinId320531	PCON_01864	SMAC_08314	3.60405	6.51532e-21	-0.793432	0.116177	1.23055	0.000791512	0.190191	0.999874	0.468404	0.998971	2.52334	6.23513e-11	-0.638258	0.611583	66.0593	20.2567	465.516	174.174	104.275	102.864	130.666	22.6538	44.0255	138.571
proteinId320547	PCON_09360	SMAC_08089	0.174235	0.816829	-0.120793	0.930912	-2.23971	0.000127738	-0.0734622	0.999874	0.230012	0.998971	-1.12954	0.0867139	1.33096	0.448964	163.375	80.2373	105.205	22.5083	129.28	153.579	166.175	181.002	91.2166	22.6571
proteinId320586	PCON_03015	SMAC_05191	1.35874	0.0280503	1.39997	0.0518557	1.647	0.00311437	-0.291706	0.999874	0.14044	0.998971	-0.859718	0.177091	-0.466878	0.830072	141.675	206.264	211.533	157.165	50.1956	69.6942	70.6534	28.3462	54.5912	15.4029
proteinId320634	PCON_01455	SMAC_08311	-0.577687	0.390565	0.0927242	0.94638	-1.10051	0.0604729	0.194569	0.999874	0.0823079	0.998971	0.372999	0.580827	0.187511	0.952957	34.1376	19.5355	12.851	18.4184	57.2431	56.1589	54.7365	65.5561	71.2579	43.7253
proteinId320688	PCON_11048	SMAC_06464	-0.842596	0.0376504	0.529481	0.319695	2.08664	1.71356e-09	-0.0192475	0.999874	0.286843	0.998971	-0.745134	0.0618421	0.272503	0.844562	88.5751	69.5011	28.2537	108.963	31.2297	35.6835	40.0543	97.3121	102.86	30.8607
proteinId320701	PCON_09769	SMAC_04628	0.741946	0.396856	-0.0200631	0.993964	-0.739196	0.370994	0.0336507	0.999874	0.0848663	0.998971	-1.8498	0.0210905	-1.17895	0.638121	348.089	183.58	336.218	117.43	254.306	279.704	273.227	173.703	491.537	77.0196
proteinId320723	PCON_04150	SMAC_03377	-0.76037	0.125075	0.189103	0.834788	-0.755118	0.0987609	-0.238513	0.999874	0.047403	0.998971	-2.21443	4.25746e-06	0.455788	0.788469	109.736	67.9016	36.867	14.1432	25.1768	33.5813	31.8895	16.6851	14.4167	1.67206
proteinId320730	PCON_06281	SMAC_00329	-1.97701	4.06892e-06	1.61598	0.000625068	-0.295838	0.520486	0.436083	0.999874	0.34644	0.998971	-0.0613165	0.905294	0.139833	0.950145	200.022	331.328	28.2011	147.929	308.835	256.414	300.188	82.4571	84.156	44.4826
proteinId320740	PCON_06310	SMAC_06600	4.07391	3.24175e-09	-0.868062	0.390129	-4.16772	6.2159e-11	-0.417501	0.999874	-0.345355	0.998971	-3.67849	1.90248e-07	0.0452545	0.994019	8.17158	2.34888	85.4847	1.63393	29.4653	44.7762	32.0455	11.5776	13.9552	0.465352
proteinId320745	PCON_11982	SMAC_00467	1.24978	0.00424938	-0.227262	0.772099	0.468628	0.283886	-0.14491	0.999874	0.199831	0.998971	2.98635	6.43832e-13	0.653989	0.638121	269.823	123.313	367.844	256.262	209.629	261.752	276.85	115.219	88.3302	369.824
proteinId320750	PCON_06294	SMAC_08468	2.42923	1.32665e-05	0.112653	0.927394	-1.77249	0.000669472	0.336826	0.999874	0.452383	0.998971	-1.36764	0.0160859	-0.816369	0.650679	74.3512	42.9928	232.915	16.6143	90.5973	80.5356	101.729	182.722	383.027	82.3942
proteinId320782	PCON_11920	SMAC_00150	-1.7925	0.0132177	-0.65147	0.531976	-0.5626	0.420993	-0.632203	0.999874	-0.560177	0.998971	4.79588	7.22835e-14	0.200868	0.955175	8.11504	2.74461	1.25613	17.6858	20.9153	37.0416	22.7473	29.4446	31.0658	541.265
proteinId32090	PCON_06861	SMAC_07104	0.952969	0.0787319	0.393129	0.642368	-0.644893	0.211369	-0.264516	0.999874	-0.3381	0.998971	-2.77702	2.30113e-07	-0.144463	0.959679	22.0123	15.5716	24.5562	18.8611	30.5016	41.4068	29.932	14.1791	18.2722	1.44151
proteinId320946	PCON_10024	SMAC_04259	0.778937	0.366571	1.74336	0.0674427	0.499883	0.555235	-0.0332313	0.999874	-0.149882	0.998971	-0.67006	0.434888	0.148808	0.975216	139.918	265.514	140.273	41.2944	34.5767	39.9436	32.8809	159.272	178.312	63.934
proteinId320958	PCON_10040	SMAC_01756	-0.0125032	0.989674	-0.480609	0.653015	0.499573	0.467415	0.0688458	0.999874	-0.386468	0.998971	1.69504	0.00947092	0.176735	0.959679	632.081	239.386	354.206	661.027	600.914	644.951	449.459	249.209	305.328	533.63
proteinId320981	PCON_13151	SMAC_04942	1.07665	0.0822206	-0.717722	0.400739	-1.02346	0.0700173	-0.103588	0.999874	-0.258316	0.998971	0.79665	0.194531	0.13322	0.969182	5.24785	1.6837	6.35919	15.0423	35.8393	43.4734	33.197	34.5646	41.6472	33.4561
proteinId321067	PCON_08302	SMAC_03451	-0.271775	0.753181	0.277091	0.851389	0.208093	0.806375	-0.0321414	0.999874	0.0761997	0.998971	0.926483	0.240943	-0.532798	0.843056	323.872	212.426	151.68	41.8315	43.8801	50.7394	49.1977	74.8088	149.995	156.213
proteinId321075	PCON_12522	SMAC_06322	0.000397482	NA	0.550236	NA	0.334217	NA	0.168916	NA	0.573695	NA	-2.31211	NA	0.771506	NA	66.6048	52.8815	37.6394	29.152	32.0362	31.9833	44.2199	209.126	141.031	12.6769
proteinId321111	PCON_08896	SMAC_08499	1.8553	0.00313682	-0.461142	0.651525	-1.35874	0.020914	0.331074	0.999874	0.24809	0.998971	1.64187	0.00842334	-0.0552879	0.990564	50.6727	19.4816	107.855	21.6876	88.882	79.1832	86.6733	23.1475	30.921	55.0182
proteinId321134	PCON_07478	SMAC_00944	-0.522515	0.430937	1.39695	0.0505869	0.11752	0.865526	-0.350207	0.999874	1.48179	0.121348	-2.35929	7.52933e-05	0.662899	0.762972	119.886	176.438	47.934	53.266	47.6929	68.9082	180.946	63.2835	48.6917	5.03369
proteinId321175	PCON_14278	SMAC_06054	0.125956	0.898058	-1.76905	0.0723771	0.30132	0.739625	0.788998	0.999874	0.537641	0.998971	-1.75569	0.0322331	0.0724889	0.99005	25.409	3.79383	16.0245	8.02629	14.2787	9.06679	12.3148	27.4084	31.8787	4.07247
proteinId321183	PCON_05228	SMAC_08888	3.09822	0.000139675	0.806145	0.511383	0.342405	0.707778	0.48902	0.999874	-0.250212	0.998971	-2.23556	0.00610045	0.789599	0.786865	1.80592	1.74254	9.72128	3.04185	4.17758	3.29775	2.51767	34.165	22.8559	2.13587
proteinId321196	PCON_13281	SMAC_05976	1.8335	0.00929242	0.798752	0.422087	0.213581	0.784987	0.4985	0.999874	-0.147293	0.998971	-2.87332	4.11164e-05	0.109859	0.97908	4.95724	4.67471	10.3438	7.76603	11.815	9.32525	7.67378	4.77616	5.48434	0.324741
proteinId321204	PCON_03062	SMAC_04289	-2.68611	6.03068e-08	0.923998	0.123903	-0.50335	0.301032	0.0907971	0.999874	0.149951	0.998971	-0.883262	0.0708552	-0.0560644	0.986449	28.0025	28.4688	2.3266	24.9188	46.8738	49.637	50.5839	63.6271	78.0079	21.7664
proteinId321206	PCON_13126	SMAC_06706	-0.130847	0.886582	-0.35692	0.798139	-0.170024	0.845351	-0.0868901	0.999874	-0.0889258	0.998971	2.95263	6.34591e-05	-0.308987	0.926272	103.504	42.9337	53.6931	28.9273	37.9963	45.6452	39.2683	33.0817	52.1786	253.907
proteinId321253	PCON_02527	SMAC_06039	1.99615	0.00196038	-2.83684	7.00774e-05	-2.3622	4.69641e-05	1.40046	0.253257	0.169533	0.998971	-6.48037	2.55957e-22	-2.14718	0.0373505	22.2597	1.54994	52.6235	22.2137	403.197	167.49	173.875	26.5401	137.228	0.74443
proteinId321431	PCON_02103	SMAC_03972	0.0247749	0.972424	0.79412	0.249144	1.28183	0.00701563	-0.430074	0.999874	-0.00400306	0.998971	-1.70054	0.00338036	0.664055	0.696472	31.2614	29.3357	18.2486	75.3513	28.263	43.2048	39.5762	19.392	15.3469	2.2781
proteinId321603	PCON_08840	SMAC_07785	-3.8272	0.00071016	-1.8568	0.0428713	1.3616	0.00807785	-0.00403758	0.999874	-0.234172	0.998971	-3.00356	3.58556e-08	0.085056	0.980669	2.48501	0.31073	0	73.796	36.0561	40.7535	31.6622	15.8522	19.1748	1.09033
proteinId321609	PCON_14082	SMAC_04100	1.14318	0.0195818	1.70844	0.00114948	0.245493	0.638616	0.491138	0.999874	0.440516	0.998971	1.09143	0.0236608	-0.506951	0.762972	217.654	394.989	280.974	79.2367	117.267	93.5102	117.221	131.729	227.34	252.535
proteinId321656	PCON_01184	SMAC_04144	1.88234	0.0365434	-0.965378	0.4461	-0.914543	0.308082	0.00243963	0.999874	-0.267351	0.998971	-1.2323	0.177514	0.952682	0.762972	26.9504	7.09887	60.4408	16.6756	39.9608	44.9541	33.9758	118.947	73.0776	13.3255
proteinId321714	PCON_10006	SMAC_02195	-2.56507	6.36587e-06	-0.778667	0.320875	-0.175435	0.786928	0.128394	0.999874	0.240993	0.998971	2.59497	3.14808e-06	-0.575555	0.775653	360.516	112.245	33.6073	63.6617	97.8201	100.722	109.61	66.9543	146.538	452.497
proteinId321733	PCON_03590	SMAC_07084	1.84907	0.0253414	-2.15696	0.032119	-1.42857	0.0649586	-0.684813	0.999874	-1.17616	0.79517	2.69911	0.000569815	0.399381	0.905437	6.57038	0.709907	14.4611	4.68674	9.81934	18.1652	7.11675	38.0763	34.8986	111.901
proteinId321777	PCON_04526	SMAC_03920	1.73621	0.000297244	-0.276103	0.750781	-3.65833	6.08147e-15	-0.864546	0.51999	-1.32687	0.0599709	-3.4533	1.49007e-13	-0.267083	0.890978	38.9455	17.1389	75.0007	1.24169	10.4086	21.5735	7.77748	80.4199	116.064	5.64417
proteinId321793	PCON_04404	SMAC_00110	-2.52983	0.000603987	-1.20938	0.145585	-0.16633	0.804645	0.0282592	0.999874	-0.279403	0.998971	2.19284	0.000166023	0.0101998	0.99544	5.23533	1.15406	0.442506	28.468	40.8266	45.1448	33.9704	23.337	33.1596	75.7205
proteinId321863	PCON_11085	SMAC_04992	0.969586	NA	-2.29068	NA	3.3028	NA	1.04934	NA	1.61225	NA	-3.17253	NA	-1.25882	NA	57.4519	5.37558	68.036	18.8621	4.22869	2.09913	6.78337	26.5632	76.9659	4.2285
proteinId321878	PCON_01728	SMAC_06298	-1.9963	0.000142432	-0.581835	0.435596	-0.658886	0.195001	-0.120622	0.999874	-0.220393	0.998971	-0.544744	0.323118	-0.203349	0.93008	18.0765	6.43577	2.49688	30.0056	54.5278	66.8787	52.5141	18.0597	25.6649	8.3338
proteinId321934	PCON_04971	SMAC_05737	-2.26764	0.00113488	1.02926	0.266521	-0.949278	0.16453	0.212783	0.999874	1.36243	0.354169	-4.08964	9.62183e-10	-1.25726	0.523074	72.7461	81.9599	8.1503	17.0939	48.3791	46.9286	114.288	66.0364	202.164	6.19424
proteinId321988	PCON_07606	SMAC_09273	-2.60627	5.23962e-09	0.29233	0.703815	-1.90412	8.75113e-06	0.67582	0.75604	0.534088	0.998971	2.5745	3.8191e-09	0.213508	0.913354	384.14	254.168	35.0793	14.7144	106.121	74.4717	99.3924	72.6995	84.4167	250.295
proteinId322121	PCON_08452	SMAC_09548	0.356971	0.669537	0.00721836	0.996896	-0.760777	0.3058	0.823942	0.999874	0.415527	0.998971	0.052861	0.951998	0.502625	0.84651	13.4187	7.25823	9.91603	18.5098	71.3877	44.4563	54.9257	59.7348	52.0664	24.8943
proteinId322180	PCON_08680	SMAC_02954	2.49245	6.40357e-08	-0.664735	0.303416	-1.28513	0.00316938	0.384688	0.999874	-0.0417375	0.998971	-1.97974	3.97658e-05	-0.289812	0.869365	19.6961	6.57174	64.1257	21.8449	88.3699	75.9285	67.6428	6.36816	9.91562	1.15555
proteinId322233	PCON_11093	SMAC_04609	-2.11763	2.37586e-05	0.945856	0.0900605	0.504131	0.25839	0.0324829	0.999874	-0.125263	0.998971	1.0085	0.0244213	0.725309	0.584868	8.34765	8.70913	1.03289	86.3962	77.2561	85.2241	71.4102	57.8642	47.9731	47.3678
proteinId322274	PCON_06443	SMAC_03937	2.02346	0.000121279	0.0397884	0.976082	0.996104	0.0521326	-0.24029	0.999874	-0.0777151	0.998971	0.600851	0.292202	-0.249556	0.913354	13.6245	7.48281	31.9767	17.7938	9.12476	12.197	10.5926	10.1209	14.1702	11.9436
proteinId322333	PCON_03435	SMAC_03125	-0.736979	NA	0.410623	NA	1.69846	NA	-0.624998	NA	0.660077	NA	-1.9749	NA	0.243319	NA	167.477	120.446	56.8367	184.506	45.0592	79.0301	116.066	71.686	76.2869	9.05078
proteinId322408	PCON_08616	SMAC_01911	0.666486	0.409141	-0.377264	0.778525	-0.380405	0.634307	-1.01085	0.852974	-0.820513	0.998971	1.28254	0.0883162	-0.252463	0.942902	234.97	95.8902	214.439	364.552	288.337	672.987	341.605	236.319	356.553	510.225
proteinId322418	PCON_04249	SMAC_07369	-1.67623	0.0023187	-0.656122	0.37784	-3.56039	2.40884e-14	-0.744386	0.794747	-0.812589	0.702848	-0.00353623	0.995551	-0.460524	0.8059	8.46784	2.87249	1.446	2.84946	25.8714	49.2839	25.5175	25.6853	41.7986	21.597
proteinId322425	PCON_12321	SMAC_06757	0.838766	0.297403	-2.15949	0.0119208	-0.293837	0.720396	0.225888	0.999874	-0.229281	0.998971	0.695625	0.385965	-0.663239	0.807401	11.7496	1.31127	12.071	25.373	46.2166	44.2787	34.4469	3.97814	8.22304	6.07714
proteinId322428	PCON_06765	SMAC_02468	1.91757	2.68381e-06	0.152839	0.854021	1.07384	0.00659175	-0.286083	0.999874	-0.0691729	0.998971	0.542829	0.254776	-0.648132	0.658801	176.693	106.274	387.067	45.7256	21.8147	30.0982	26.1965	9.67257	18.9599	15.3378
proteinId322436	PCON_07333	SMAC_03450	1.17182	0.0310224	0.622754	0.409113	0.976247	0.0506728	1.02136	0.382487	0.787452	0.769508	-0.814738	0.134971	0.351192	0.848841	15.7999	13.2463	20.7015	183.281	238.555	130.728	209.442	96.8999	107.973	29.0295
proteinId322445	PCON_13056	SMAC_03304	1.25189	0.0121787	-0.495669	0.495332	-0.370136	0.476526	-0.172326	0.999874	0.392993	0.998971	-0.397171	0.457778	-0.0141804	0.995399	29.5563	11.3187	40.9229	6.17412	8.78098	11.1697	13.4933	46.5642	54.865	21.3849
proteinId322553	PCON_06495	SMAC_04578	0.285303	0.688677	-0.222562	0.856142	1.33653	0.0210952	-0.347669	0.999874	-0.532296	0.998971	1.09522	0.0910069	0.607826	0.787421	24.9587	11.5614	17.3864	53.3062	20.404	29.4648	18.5678	10.7239	8.53429	8.81149
proteinId322603	PCON_03423	SMAC_01277	-2.05966	0.0342234	-0.488445	0.776148	4.78771	1.27452e-08	-4.37918	2.72386e-05	-0.0741476	0.998971	1.28549	0.191026	0.789911	0.813611	28.5865	10.7468	3.55169	1305.85	2.02908	59.7693	52.2509	21.1946	16.1658	22.8259
proteinId322656	PCON_05188	SMAC_05033	-1.5004	0.0336864	0.452799	0.696166	-0.163663	0.835413	-0.191013	0.999874	-0.128489	0.998971	-0.26733	0.734024	-0.944347	0.667404	30.1215	22.3337	5.80859	41.9848	51.5717	66.6065	55.6503	15.866	37.7452	18.2308
proteinId322725	PCON_09673	SMAC_03472	0.885074	0.248762	-0.753996	0.470077	-3.69168	7.52591e-09	0.769952	0.999874	0.234477	0.998971	0.735889	0.330376	0.851281	0.720405	24.1274	7.49202	25.8331	5.25328	157.138	102.024	110.867	77.8335	52.252	40.7217
proteinId322731	PCON_09652	SMAC_03430	0.326899	0.461877	0.540216	0.321571	0.136791	0.759094	-0.0486204	0.999874	-0.166099	0.998971	0.798209	0.0474892	-0.152763	0.930969	38.1414	29.818	27.1774	43.7219	47.5042	55.365	45.329	33.1879	44.4697	42.3541
proteinId322824	PCON_07707	SMAC_03025	0.210894	0.757242	-0.0507743	0.972214	0.397296	0.524637	-0.437348	0.999874	-0.538863	0.998971	0.108253	0.87537	1.06511	0.523074	19.6515	10.1528	12.9337	89.492	61.7837	94.9129	59.4123	107.437	55.6007	31.1974
proteinId322875	PCON_05054	SMAC_00802	2.78897	NA	-3.77172	NA	2.96075	NA	-0.0378024	NA	-1.5923	NA	4.59145	NA	-0.695948	NA	114.796	3.36056	545.237	230.938	29.8013	34.8107	9.13155	103.691	229.525	3259.57
proteinId322901	PCON_03705	SMAC_05266	1.62752	0.00183728	-0.956901	0.154159	-2.9747	4.64595e-10	-0.0658823	0.999874	0.0142711	0.998971	2.60214	1.98038e-07	0.315682	0.868588	24.2646	6.6098	43.2405	3.27777	31.4967	37.2123	34.3745	32.9627	34.1997	100.952
proteinId322991	PCON_01934	SMAC_07074	0.913944	0.275095	0.844368	0.450974	4.1208	2.53068e-09	0.514136	0.999874	-0.46696	0.998971	-0.25647	0.775537	-0.126931	0.977818	30.6011	30.227	33.7147	270.45	25.5713	19.8982	13.0096	9.12365	12.071	5.99811
proteinId323002	PCON_07279	SMAC_08816	1.6599	0.000447067	1.45384	0.00674994	0.782968	0.0896127	-0.558634	0.995854	-0.225956	0.998971	-1.58025	0.000846393	0.0321553	0.993754	184.39	275.331	336.322	87.5039	41.9786	70.1783	54.9246	104.407	132.027	23.201
proteinId323088	PCON_13636	SMAC_07553	2.26102	5.50496e-10	-0.680415	0.162606	-0.218097	0.589253	-0.566624	0.737688	-0.484558	0.928018	0.554742	0.170374	0.110396	0.959473	18.219	6.06921	50.3604	31.5615	30.7339	51.4696	33.5866	5.32981	6.44334	4.59536
proteinId323242	PCON_06080	SMAC_03551	1.37029	0.00187875	-0.630517	0.296893	-1.86461	2.92386e-05	-1.47209	0.0183443	-1.1282	0.125703	-1.4543	0.00221552	-0.769553	0.578155	26.7945	9.21675	39.9407	2.14125	3.60755	11.496	4.75675	5.5576	10.947	2.07843
proteinId323262	PCON_01281	SMAC_04164	-0.894884	NA	2.08321	NA	-1.70206	NA	-0.103151	NA	0.0243234	NA	0.181776	NA	0.0516978	NA	2147.81	5141.11	642.855	223.871	865.843	1051.84	982.255	1542.68	1955.76	1238.26
proteinId323290	PCON_13408	SMAC_02431	-1.79945	NA	-0.547091	NA	-1.64472	NA	-0.430924	NA	1.35482	NA	2.08592	NA	0.458119	NA	75.2016	27.2912	11.8168	12.9919	38.1776	58.4084	140.059	123.457	107.928	227.989
proteinId323318	PCON_01251	SMAC_02382	1.19632	0.0915047	-0.00736575	0.996896	1.77208	0.0048546	-0.292641	0.999874	0.176515	0.998971	-0.749982	0.301212	-0.0994841	0.981829	124.546	66.3964	165.788	138.281	39.4412	54.9086	57.1365	43.726	59.615	19.8623
proteinId323382	PCON_10055	SMAC_01632	1.01814	0.178778	-2.6934	0.0270549	5.46646	3.75364e-26	0.0430852	0.999874	-0.581809	0.998971	0.745125	0.240498	0.486899	0.822445	2.06591	0.0648869	2.48038	2422.07	66.9686	73.385	44.6356	38.053	35.7395	27.8733
proteinId323392	PCON_08516	SMAC_01605	-2.07898	0.00222419	1.87969	0.0155319	-0.735903	0.281493	-0.267953	0.999874	0.00257077	0.998971	1.25743	0.0678433	-0.150059	0.970271	204.009	419.327	26.1445	77.7826	133.915	183.095	168.109	82.7919	111.145	157.626
proteinId323422	PCON_03284	SMAC_01614	3.16503	1.64137e-07	-1.11254	0.163068	-0.505801	0.432995	-0.634648	0.999874	-1.01059	0.652171	-0.424026	0.536512	1.28071	0.457752	100.045	24.4245	539.209	130.507	146.026	259.027	115.718	199.411	95.5243	34.1752
proteinId323454	PCON_11572	SMAC_04536	5.56679	1.14665e-09	-0.790884	0.597285	-5.45448	2.15727e-07	-7.02182	8.4452e-07	-7.27274	1.79988e-07	0.992233	0.370241	-0.90544	0.813004	75.6383	22.9154	2535.31	0.336353	0	40.1369	0	1.22295	4.43975	3.66233
proteinId323484	PCON_08647	SMAC_05529	2.89617	NA	-0.642593	NA	3.57877	NA	-1.21798	NA	0.0162508	NA	1.7548	NA	0.2269	NA	322.386	104.591	1729.69	255.446	7.02473	21.7837	20.0243	490	617.945	1145.32
proteinId323579	PCON_05302	SMAC_03821	-3.77218	2.70752e-05	-0.574584	0.700269	-2.94992	0.00638245	4.93339	1.69291e-07	4.90529	1.83984e-07	-3.97443	4.54212e-06	0.17406	0.972532	34.8047	12.1068	1.22551	0.113362	39.1573	1.16759	39.6407	47.3146	54.1221	1.66303
proteinId323600	PCON_03579	SMAC_06377	1.41757	0.121351	-0.541657	0.72593	1.57753	0.0532989	-0.332175	0.999874	-0.057132	0.998971	-4.48183	6.11267e-08	0.686107	0.822807	3.54936	1.25563	5.75051	83.7497	26.6637	38.2721	33.7174	267.65	199.221	3.44729
proteinId323669	PCON_05946	SMAC_00121	2.36173	2.62914e-08	0.377147	0.580299	-1.58291	7.87674e-05	-0.169019	0.999874	-0.385291	0.998971	1.41103	0.00116295	0.0666406	0.980891	183.957	128.418	546.68	22.9358	77.1193	97.9426	68.5663	35.9371	40.8633	58.1426
proteinId32367	PCON_12617	SMAC_03893	-1.96042	0.125812	-1.54648	0.360028	2.36793	0.0405894	-1.52581	0.936946	-1.59239	0.906333	-6.22453	1.31761e-06	1.2506	0.766174	12.8253	2.05294	1.53482	195.319	13.7628	50.195	13.5286	54.1661	26.2766	0.0324545
proteinId323683	PCON_04707	SMAC_06471	-1.36868	0.0487386	0.138887	0.92358	-1.1199	0.0845348	-1.61002	0.157395	-1.28705	0.393941	-1.9141	0.00595671	0.512341	0.834983	347.73	210.216	75.7203	90.6474	80.3665	287.345	104.764	23.6113	19.7475	2.37329
proteinId323688	PCON_09276	SMAC_08461	-3.79512	1.21086e-17	-0.0395595	0.97116	-1.72707	2.60435e-05	0.0336318	0.999874	0.252554	0.998971	-0.0526918	0.921974	-0.0600556	0.983287	119.217	62.016	4.64716	13.364	56.9351	62.7467	68.6048	56.9235	69.5015	36.5042
proteinId323710	PCON_04721	SMAC_04804	1.76506	0.00095829	1.13723	0.0809901	0.0427076	0.94483	0.26841	0.999874	0.141986	0.998971	-1.14045	0.0444336	0.431101	0.827323	20.6295	24.5568	40.4612	16.6305	24.1467	22.5365	22.8157	11.6787	9.55427	2.18354
proteinId323732	PCON_04346	SMAC_04327	1.06716	0.0343656	-0.633633	0.355239	0.798374	0.0910752	0.406886	0.999874	0.243352	0.998971	-0.0246473	0.967857	-0.313756	0.860447	29.0258	9.89411	34.5731	66.9939	64.4525	54.5416	59.3872	6.51243	9.45901	4.72643
proteinId323753	PCON_04357	SMAC_00471	0.583959	0.528459	0.0468155	0.982759	-2.29973	0.00268148	0.0707923	0.999874	0.137967	0.998971	-2.40042	0.00344389	0.399189	0.910651	62.9734	34.9907	54.6786	5.67122	38.6141	41.3666	41.92	60.3734	56.1446	4.37815
proteinId323876	PCON_09510	SMAC_00082	4.51495	NA	-4.56131	NA	1.90254	NA	-0.926489	NA	-0.350149	NA	-0.565725	NA	-0.158263	NA	9.24186	0.0742037	189.866	19.4452	2.45846	6.1001	4.12251	14.7587	22.6547	6.42219
proteinId323949	PCON_10082	SMAC_03238	2.24232	2.05887e-06	-0.755232	0.240631	1.70273	9.92537e-05	0.00946843	0.999874	0.0537756	0.998971	-0.0761059	0.893893	0.199536	0.923353	142.246	44.6026	390.403	246.779	93.1413	104.307	99.4779	132.969	135.015	65.8396
proteinId323964	PCON_13537	SMAC_00883	-1.14014	0.129494	-3.00035	0.000129949	1.49776	0.0242758	-0.571391	0.999874	0.423874	0.998971	5.40907	1.07803e-15	1.31967	0.512733	16.1222	0.988157	4.03117	32.3824	9.08893	15.4378	19.1836	20.4388	8.95315	213.258
proteinId323979	PCON_04897	SMAC_04486	0.611256	0.28277	0.88906	0.192969	-0.341246	0.549948	0.473804	0.999874	0.39157	0.998971	1.17354	0.0300187	-0.28897	0.897232	50.7078	51.5354	45.0339	14.9567	32.7575	26.4211	32.0808	9.65383	15.6148	19.0804
proteinId324076	PCON_09217	SMAC_00353	3.75373	3.63226e-10	-3.65749	6.95041e-09	-1.93846	0.000619157	1.62026	0.0882617	0.584048	0.998971	-1.32834	0.035221	0.132209	0.970852	154.587	6.14531	1261.35	64.2995	1003.58	357.651	497.982	21.0455	22.6927	4.24769
proteinId324080	PCON_13445	SMAC_06241	-5.69377	1.62827e-13	0.127782	0.886604	-2.14143	6.11896e-08	0.159845	0.999874	0.111233	0.998971	1.12234	0.00866164	0.653112	0.638121	17.2278	10.1224	0.125683	4.56946	27.2654	27.4756	27.3309	58.7987	46.1922	50.788
proteinId324087	PCON_13457	SMAC_12757	0.526436	0.320147	0.183386	0.84793	-0.285267	0.586453	0.186105	0.999874	0.338351	0.998971	-2.86232	1.16185e-09	-0.533016	0.762972	2136.95	1303.6	1750.65	364.897	631.71	625.137	727.705	383.758	780.867	52.3685
proteinId324088	PCON_13458	SMAC_02337	0.0971468	0.912386	2.20462	0.00616573	-0.766252	0.289664	0.209134	0.999874	0.299475	0.998971	-0.947234	0.205007	-0.378923	0.898876	70.1152	183.13	42.5438	59.3012	147.907	143.603	163.497	144.29	227.872	67.3948
proteinId324100	PCON_05471	SMAC_02605	-3.29553	1.37732e-05	-0.608318	0.619197	0.774295	0.324544	1.51257	0.369315	1.15101	0.769508	-4.78745	2.17565e-10	-0.666633	0.810127	125.168	43.3132	6.64532	22.1441	46.9302	17.768	37.4089	31.9776	64.267	1.15744
proteinId324126	PCON_10171	SMAC_06359	-2.54022	6.71842e-08	0.810293	0.149551	3.35074	2.94867e-18	-2.33481	2.38422e-06	-3.76425	1.15353e-14	-0.303638	0.537589	-0.597972	0.667657	31.1936	29.8151	2.99595	210.626	4.84221	28.2808	1.82296	15.7203	30.1555	12.9458
proteinId324134	PCON_08660	SMAC_08070	-0.642413	0.179578	-0.37203	0.597285	0.676921	0.115974	0.969961	0.253257	0.558534	0.953554	0.753289	0.141994	0.0776367	0.979489	43.13	17.9431	15.7022	50.185	76.7926	43.7954	59.6113	3.95056	4.07525	3.68144
proteinId324153	PCON_08663	SMAC_04959	-0.417561	0.493135	1.44884	0.021904	1.75832	0.000400786	-0.121527	0.999874	0.307172	0.998971	3.04778	6.93596e-09	-0.23735	0.921713	133.879	201.774	57.004	165.49	54.7827	67.3755	76.8333	22.8577	38.0294	166.623
proteinId324167	PCON_05257	SMAC_05026	-0.366999	0.541908	2.17814	0.000129916	1.06199	0.0345053	0.326922	0.999874	-0.38538	0.998971	-1.33201	0.013104	-0.432712	0.822307	48.1616	120.704	21.1342	278.9	208.938	186.742	130.981	31.4569	51.1237	11.2444
proteinId324235	PCON_06168	SMAC_08474	1.75121	1.58607e-08	-0.157915	0.789981	0.526339	0.0845489	-0.358509	0.999874	-0.558028	0.521995	0.035923	0.925352	0.0359717	0.986801	39.269	18.8445	75.7582	89.4248	59.9325	86.7005	53.9273	24.8001	29.9983	15.1795
proteinId324241	PCON_12703	SMAC_06342	1.00886	0.0249019	2.1227	3.5336e-06	2.42288	7.48054e-10	-1.1536	0.114698	-0.501207	0.998971	0.964354	0.0340503	-0.0262615	0.994019	33.0051	79.1902	38.4862	55.8608	5.62465	14.3123	9.24605	11.7595	14.112	14.3501
proteinId324332	PCON_10791	SMAC_04572	1.05831	0.0593037	0.813187	0.262394	-0.0356158	0.95309	-0.688889	0.926372	-0.605865	0.998971	-4.26922	3.83471e-14	0.8424	0.623112	19.3054	18.5526	23.4083	47.0941	36.9167	67.7244	40.5152	93.0145	67.0928	1.48626
proteinId324544	PCON_06635	SMAC_03109	-0.164717	0.778588	-1.39349	0.0175821	-0.550159	0.283335	-0.32572	0.999874	-0.843823	0.61451	3.68143	3.16243e-14	0.317591	0.860879	268.825	53.4945	134.424	227.309	331.26	468.859	237.925	68.088	62.2744	465.555
proteinId324546	PCON_06656	SMAC_09366	2.07979	1.47795e-07	0.124566	0.882791	2.35939	4.30107e-11	-0.356108	0.999874	0.116319	0.998971	-2.61493	0.0036822	-0.258756	0.913354	61.7737	36.1276	150.818	140.373	26.428	38.2634	38.0723	1.49729	2.56626	0.107869
proteinId324550	PCON_02248	SMAC_07100	-0.680882	0.211494	1.51633	0.00703964	1.94407	1.24859e-05	0.157203	0.999874	0.154054	0.998971	-0.604917	0.248336	-0.710521	0.652331	12.4342	19.379	4.38703	64.6014	23.1699	23.4062	23.9782	16.4455	32.3593	10.5497
proteinId324599	PCON_10656	SMAC_06164	2.43752	0.00128555	1.33509	0.168821	-0.970629	0.205709	0.0612493	0.999874	0.0633283	0.998971	0.689406	0.442599	0.465603	0.8853	29.0434	40.6844	95.2908	5.01482	12.8388	13.8485	13.2966	1.7634	1.80717	1.16293
proteinId324711	PCON_08039	SMAC_07389	-0.232547	0.785825	-1.15729	0.241819	-2.5038	0.000228123	-0.107944	0.999874	-0.65874	0.998971	-3.21463	1.63457e-05	-0.24741	0.945665	13.0234	3.06837	6.25878	2.46417	16.7407	20.3773	11.6587	14.1676	21.0008	0.948375
proteinId324740	PCON_03577	SMAC_05975	0.86495	0.256319	-0.0141041	0.995653	2.61854	4.40144e-05	-0.232627	0.999874	-0.141625	0.998971	3.28376	1.80059e-06	-0.472753	0.850301	46.8279	24.9163	49.6701	111.724	18.3645	24.5041	20.2929	6.71209	12.3214	72.5193
proteinId324836	PCON_07541	SMAC_03585	0.933221	NA	2.08235	NA	6.54386	NA	2.97978	NA	0.0674433	NA	0.322841	NA	-1.51023	NA	8.96631	27.521	11.4625	145.803	10.9494	0.816377	0.801495	37.8143	153.504	115.253
proteinId324844	PCON_09076	SMAC_02840	1.71112	1.23145e-06	-2.20106	3.23843e-09	0.380411	0.297793	-0.42639	0.988356	0.204969	0.998971	0.874552	0.0154236	-0.355773	0.780786	68.1331	7.77048	127.405	83.4339	59.1142	89.7953	95.0973	62.2954	94.3696	90.7407
proteinId324874	PCON_13046	SMAC_05733	2.90906	1.81756e-06	-1.18607	0.131887	0.698724	0.268252	0.759015	0.96758	2.77103	6.11596e-05	-1.6218	0.00924578	0.289107	0.913354	27.1362	6.17998	120.813	18.6175	24.1061	15.8193	104.253	47.6027	47.0413	8.52086
proteinId324888	PCON_08975	SMAC_06352	-0.769195	0.187848	0.999751	0.148345	0.381399	0.511776	-0.039894	0.999874	0.231835	0.998971	-0.574699	0.325285	0.418802	0.830072	104.497	113.598	34.2295	32.0859	29.3864	34.109	36.8007	81.6713	74.9281	24.3444
proteinId324984	PCON_05269	SMAC_00758	1.66428	0.00994845	-0.337676	0.77084	-0.924305	0.147668	-0.157797	0.999874	0.0473942	0.998971	-2.07503	0.0025565	0.536852	0.815692	32.5803	13.8221	60.9312	8.11463	17.1895	21.6737	20.5498	14.5376	12.3526	1.28789
proteinId325126	PCON_11845	SMAC_02474	1.25592	0.0525414	0.751658	0.397537	0.932865	0.126513	-0.00553935	0.999874	0.217371	0.998971	2.63999	1.49278e-05	-0.281802	0.917839	1313.57	1209.85	1827.01	849.799	549.263	621.882	668.03	306.602	494.373	1747.68
proteinId325142	PCON_07467	SMAC_03291	0.946291	0.00538406	0.578844	0.183357	0.911228	0.0028618	0.610912	0.457555	0.57885	0.533441	0.0154967	0.96996	0.758436	0.362622	37.5768	30.4087	41.6641	187.655	189.986	139.934	192.288	55.4006	38.7224	20.517
proteinId325218	PCON_04091	SMAC_01223	0.537656	0.439572	0.456567	0.65748	-0.130438	0.858004	0.0320589	0.999874	-0.231487	0.998971	-0.780257	0.241207	0.370302	0.875612	205.057	153.42	171.507	87.8644	121.829	134.184	104.546	145.998	164.708	46.6696
proteinId325292	PCON_12416	SMAC_01493	0.790853	0.342374	0.315675	0.831956	0.870121	0.258873	0.00537536	0.999874	0.0239138	0.998971	-3.73456	7.90408e-07	0.62075	0.820399	30.9835	20.9301	31.3018	65.0174	43.6325	49.0459	45.7243	83.7439	65.1954	2.01171
proteinId325305	PCON_05318	SMAC_05294	-1.94514	1.29158e-05	0.457052	0.48362	1.27841	0.00172265	-0.950683	0.287453	0.215822	0.998971	1.42454	0.0011858	0.261451	0.87638	107.132	78.6899	15.44	74.1846	19.2722	42.3641	45.1291	39.1613	42.4867	59.1848
proteinId325309	PCON_10799	SMAC_07117	0.0477101	0.951508	1.4477	0.0428713	0.0217605	0.973506	-0.0901132	0.999874	0.0801118	0.998971	-0.158076	0.820243	-0.131189	0.970641	204.843	306.827	120.429	100.345	115.428	138.838	134.769	179.358	235.857	120.86
proteinId325312	PCON_05445	SMAC_04195	1.37873	0.0104784	-1.25526	0.0488911	-2.04466	3.23656e-05	-0.732659	0.853152	-1.16046	0.242563	2.20389	2.42586e-05	0.287588	0.897232	42.623	9.38942	63.804	6.14976	18.7924	35.5228	14.3784	14.7359	14.0486	33.1958
proteinId325336	PCON_07909	SMAC_00939	2.4348	2.04857e-14	-0.650421	0.131792	-1.28304	1.23935e-05	-0.427808	0.895409	-0.46288	0.81997	-0.25935	0.472153	0.502332	0.635341	8.87964	3.01341	27.5456	17.7323	40.1247	60.9329	40.4678	21.3098	18.8117	8.10003
proteinId325344	PCON_01336	SMAC_07208	-0.607296	0.592495	-3.68946	0.00121532	0.711231	0.499794	0.0330064	0.999874	-0.4377	0.998971	-2.70843	0.00880687	-0.00663476	0.997519	19.8303	0.654195	7.30528	22.5797	17.3603	19.0818	12.6294	12.5575	16.2691	0.916364
proteinId325361	PCON_06587	SMAC_03682	0.200575	0.624644	-1.16799	0.00594222	-1.54934	7.91141e-07	-0.474994	0.837539	-0.615223	0.48228	-0.276937	0.471598	1.24861	0.0161328	11.085	2.62274	7.20907	9.30209	23.8734	37.5328	22.4231	32.4419	16.9979	7.15451
proteinId325411	PCON_04519	SMAC_05444	-1.33642	0.0316139	-0.446815	0.648382	0.249975	0.707863	-0.479112	0.999874	-0.0919003	0.998971	1.92059	0.00122898	-0.101851	0.977549	64.0311	25.1177	14.1382	16.1542	11.8722	18.8114	16.1885	17.4253	24.1857	52.1886
proteinId325439	PCON_12612	SMAC_05116	0.26104	0.75981	2.18342	0.00959972	-1.82315	0.00840663	0.0117077	0.999874	-0.0358808	0.998971	-3.95613	5.52871e-08	0.854931	0.739217	25.9068	67.0908	17.8217	8.70564	40.1545	44.911	40.1346	78.0344	52.236	1.37188
proteinId325449	PCON_03526	SMAC_04161	-1.32643	0.0120919	1.24784	0.0361703	1.16672	0.0127769	-0.56772	0.999874	0.0401087	0.998971	-0.881401	0.0914809	0.570167	0.754995	32.5066	42.3457	7.3043	73.684	27.0352	45.4996	43.0325	34.2708	25.8786	7.18027
proteinId325488	PCON_09281	SMAC_02243	0.644682	0.342214	-0.135807	0.91906	-1.04095	0.0930278	0.54908	0.999874	-0.0590244	0.998971	-0.683187	0.318546	0.441547	0.846402	50.9078	24.8353	45.8452	4.59745	17.1505	13.0948	11.4975	11.2519	10.2485	3.03773
proteinId325620	PCON_08121	SMAC_04293	-0.427992	0.297683	-1.11368	0.0106054	0.663824	0.0597383	-0.769848	0.312636	-0.579575	0.707889	0.0141702	0.97408	-0.204793	0.890978	24.8613	6.13048	10.3773	54.0615	24.7255	47.765	29.1966	19.1096	27.6388	14.4807
proteinId325621	PCON_09416	SMAC_07795	0.723328	0.434269	-0.765553	0.55188	-1.78698	0.024298	0.000448668	0.999874	0.031557	0.998971	-4.10136	5.01419e-07	0.392012	0.913354	42.702	13.0483	40.7876	12.6728	56.9742	64.2284	60.3516	91.9429	86.5242	1.93289
proteinId325625	PCON_11150	SMAC_06691	0.0150205	0.990563	-1.28511	0.30383	-1.3366	0.141523	-0.330676	0.999874	-0.461538	0.998971	-4.16527	5.25807e-06	1.14145	0.696472	27.4263	5.71286	15.6533	4.2436	10.8177	15.5768	10.187	58.5846	32.072	0.63871
proteinId325626	PCON_07003	SMAC_04760	1.10354	0.0923137	-0.375028	0.735101	-0.293269	0.673216	0.457721	0.999874	0.558348	0.998971	-1.23799	0.0536557	0.7247	0.740343	95.3103	39.1831	118.98	30.8553	65.4292	53.2037	72.7472	115.948	85.8683	16.5528
proteinId325629	PCON_11657	SMAC_02571	1.75852	NA	-0.35925	NA	0.0708592	NA	0.292947	NA	0.306174	NA	0.225057	NA	-1.14285	NA	91.9504	37.6231	180.043	36.6233	53.2056	48.699	55.6411	29.6667	80.6323	54.4665
proteinId325636	PCON_13269	SMAC_05195	-0.0550032	0.922556	-0.264227	0.748661	-1.7853	1.7736e-05	-0.112676	0.999874	-0.25454	0.998971	-2.02523	6.04137e-06	0.458651	0.775653	144.139	63.7743	78.1178	27.8212	111.82	136.408	104.726	296.278	252.165	31.6487
proteinId325646	PCON_06675	SMAC_07918	0.0381831	0.971063	0.390597	0.780592	-2.37211	0.000830257	-0.28845	0.999874	-0.748236	0.998971	0.325149	0.709883	0.884763	0.739217	48.5638	34.5072	28.2389	6.5682	36.0713	49.9688	26.7536	72.3505	45.0293	27.0841
proteinId325649	PCON_02724	SMAC_01746	0.493396	0.471955	0.835075	0.321571	1.15564	0.0492137	0.214289	0.999874	0.165781	0.998971	-1.38777	0.0256971	0.114331	0.975216	71.5866	69.7958	57.7586	84.5394	53.7029	51.9681	53.7463	92.3048	103.594	18.1407
proteinId325674	PCON_05791	SMAC_02214	-3.17261	9.40966e-14	1.35526	0.00306279	-0.108352	0.816274	-0.539071	0.900041	-0.15181	0.998971	0.894473	0.0322138	0.850094	0.457914	71.8648	98.8402	4.32384	82.3791	75.8152	124.789	102.861	77.4906	58.3582	53.8811
proteinId325693	PCON_14193	SMAC_09382	0.367613	0.711701	0.598142	0.67664	-1.58614	0.0567188	0.524445	0.999874	0.160351	0.998971	-1.02352	0.259879	1.18168	0.667404	22.9758	19.0168	16.969	5.71048	32.1576	24.7023	25.5078	191.375	97.3856	21.2159
proteinId325731	PCON_06313	SMAC_12596	0.0632772	0.92001	0.521457	0.48659	-1.28039	0.00795114	-0.547056	0.999874	0.0796917	0.998971	-0.0968581	0.871358	0.467707	0.799532	45.107	34.5543	26.5405	8.04206	16.4873	27.3882	26.5071	77.8862	63.5269	31.2688
proteinId325733	PCON_12051	SMAC_02797	-0.335098	0.626879	1.41336	0.0488911	-0.182466	0.788593	0.344607	0.999874	0.185886	0.998971	-5.20986	1.19299e-13	0.22545	0.935904	57.7089	83.5336	25.5	29.0236	52.6021	46.3995	48.6963	22.8348	22.5333	0.249494
proteinId325767	PCON_02071	SMAC_02693	-0.168153	0.863549	-0.995891	0.391163	1.41048	0.0721282	-0.306548	0.999874	-0.225472	0.998971	-2.11391	0.0196802	0.896602	0.762972	32.761	8.57688	16.4817	66.4079	24.5124	34.5378	26.8479	9.92941	6.09845	0.589478
proteinId325831	PCON_06950	SMAC_03799	0.406412	0.31065	0.369407	0.497324	0.0508138	0.905	-0.272492	0.999874	-0.74204	0.334502	-0.699632	0.082955	0.324842	0.812864	98.1711	68.4706	74.2254	85.5105	84.9975	115.724	63.35	26.1015	25.8607	8.16984
proteinId325858	PCON_03070	SMAC_04603	-1.02744	0.0333548	-0.608989	0.3458	1.60636	0.000153915	0.301134	0.999874	-0.0234238	0.998971	-1.90768	9.17941e-05	-0.860129	0.527286	132.062	46.3103	36.6291	120.498	60.1964	54.9212	49.6003	22.873	60.0116	7.12977
proteinId325862	PCON_02326	SMAC_01330	2.5767	2.27991e-09	-0.136953	0.881913	1.19777	0.00340729	-0.823623	0.450275	-0.444625	0.998971	0.619444	0.183195	-0.142508	0.950145	41.4482	20.161	143.903	98.1157	29.3284	59.0339	39.6336	41.137	55.378	41.7296
proteinId325874	PCON_01589	SMAC_05409	-0.466895	0.423354	0.287146	0.76301	-0.708486	0.172344	-0.440825	0.999874	-0.357109	0.998971	-0.119681	0.847346	0.757596	0.652331	101.417	66.322	41.0743	48.8213	73.2242	112.693	80.3395	197.071	134.722	62.9503
proteinId325893	PCON_01459	SMAC_08441	0.788782	0.273185	-0.271031	0.83382	0.0550813	0.942301	-0.115976	0.999874	-0.470692	0.998971	0.681989	0.338448	-0.191682	0.95868	78.783	34.7051	78.2535	118.309	130.231	159.405	104.477	42.2003	57.1589	54.4793
proteinId325907	PCON_10427	SMAC_00153	0.755346	0.311648	-0.213478	0.879541	2.58161	3.32664e-05	0.157897	0.999874	0.0582302	0.998971	-0.0226087	0.977516	-0.11896	0.976111	442.993	205.882	435.689	255.81	57.0367	57.3483	54.9927	142.054	229.172	111.33
proteinId325915	PCON_05698	SMAC_05395	0.373895	0.527804	-0.310356	0.740186	1.3996	0.00371713	0.148007	0.999874	0.136433	0.998971	-0.894716	0.104155	-0.405394	0.830072	29.6361	12.784	21.8744	102.251	53.2372	54.1198	54.6194	15.9937	25.1003	7.67034
proteinId325964	PCON_12701	SMAC_02803	0.420373	0.589904	-0.282009	0.833262	3.3955	3.09972e-08	-0.463813	0.999874	-0.198965	0.998971	-3.90076	8.44224e-08	0.0719031	0.988742	67.7219	29.9678	51.9844	161.719	13.1837	20.7556	16.5224	18.7362	20.3082	0.610171
proteinId325977	PCON_06617	SMAC_08316	-0.594796	0.274738	0.91881	0.14576	0.377665	0.466867	0.577772	0.992947	0.0679202	0.998971	-0.533691	0.313946	0.486355	0.782175	45.7675	46.67	16.7537	78.5281	112.215	84.2558	81.0021	72.9967	66.8324	23.8299
proteinId326003	PCON_11348	SMAC_08611	1.11732	0.293665	-0.349556	0.858123	-3.82843	0.000797493	-2.41098	0.227267	-1.5029	0.79581	-4.34072	0.00214281	1.04125	0.770989	15.671	6.47103	20.0825	0.108869	0.571265	4.06935	1.21184	4.83705	3.31127	0
proteinId326023	PCON_11684	SMAC_07094	1.63713	0.040336	-0.540262	0.67629	1.86273	0.0100767	-0.130593	0.999874	-0.178021	0.998971	-1.2847	0.110934	-0.87335	0.760036	171.894	63.0216	321.975	483.187	143.437	177.415	143.513	49.4889	140.728	27.4334
proteinId326068	PCON_10439	SMAC_01988	0.381639	0.674142	0.695071	0.56932	0.241384	0.786928	0.00635355	0.999874	0.299751	0.998971	-2.42364	0.00192778	-0.869908	0.762972	256.488	226.637	191.533	162.588	171.638	192.724	219.758	167.614	378.824	38.8173
proteinId326077	PCON_13275	SMAC_06549	1.71351	0.00466156	2.386	0.000217732	-2.06781	0.000151686	0.447846	0.999874	0.225886	0.998971	0.338784	0.612017	0.05691	0.989753	1191.33	3474.93	2284.35	230.907	1688.75	1387.18	1494.78	654.262	893.943	579.214
proteinId326114	PCON_01305	SMAC_08274	0.504761	0.536447	2.05244	0.0138578	0.440387	0.572952	-0.383988	0.999874	0.014263	0.998971	-1.79991	0.0140807	-0.251447	0.942902	95.8311	223.843	77.9513	46.2917	31.5115	46.9377	43.4739	40.4088	61.8501	9.64992
proteinId326144	PCON_08709	SMAC_04448	-1.46188	0.00356879	1.61373	0.00298862	-1.4201	0.00346894	-0.0888977	0.999874	0.349347	0.998971	-0.314821	0.740502	1.23753	0.512733	149.646	249.675	30.2624	10.0676	31.2601	37.5526	44.0262	2.75961	1.52269	0.413246
proteinId326147	PCON_13622	SMAC_05058	0.422425	0.522528	0.170599	0.886611	1.42045	0.00953633	0.0830787	0.999874	0.462779	0.998971	-2.509	3.20436e-05	-0.181744	0.953269	351.338	213.239	269.499	222.349	107.605	114.372	145.67	12.9203	18.1916	1.73539
proteinId326148	PCON_10917	SMAC_05742	-0.22147	0.640298	0.902183	0.0689056	0.767077	0.0472501	0.0902006	0.999874	0.110088	0.998971	-2.39194	4.03431e-09	-0.127261	0.952957	22.2558	22.2633	10.6805	68.5754	53.0845	56.1792	55.664	27.438	35.3822	3.40384
proteinId326158	PCON_14049	SMAC_08463	-0.130354	0.867506	0.428874	0.699375	0.311804	0.66352	0.0145052	0.999874	-0.0128624	0.998971	0.516332	0.468069	0.424524	0.853434	131.981	95.8269	67.9066	102.736	103.668	115.763	105.371	107.284	106.116	83.259
proteinId326178	PCON_05630	SMAC_07913	-0.167398	0.826038	0.348652	0.767397	-0.889935	0.16453	0.584755	0.999874	0.667229	0.998971	0.0267024	0.972764	0.424963	0.852988	47.8735	32.707	23.9185	27.6308	98.2516	72.9785	107.491	97.8523	88.6982	42.6319
proteinId326189	PCON_13551	SMAC_02202	-0.263599	0.562255	0.997013	0.0348997	-0.593821	0.132202	-0.106826	0.999874	0.225102	0.998971	-4.99158	1.94195e-34	0.083122	0.971541	102.049	109.992	48.1319	24.1116	41.9665	51.0608	54.736	117.469	142.224	2.25413
proteinId326197	PCON_03592	SMAC_01926	-0.385246	0.703741	-0.392517	0.812871	0.105088	0.917623	0.0757644	0.999874	0.0665384	0.998971	-1.87357	0.0342991	2.11578	0.289838	12.9635	5.22128	5.55303	27.3213	33.7496	35.9572	34.6709	146.371	36.8162	4.37215
proteinId326200	PCON_08447	SMAC_00496	2.48081	3.40716e-06	1.59047	0.0105075	0.187491	0.759846	0.472257	0.999874	0.368237	0.998971	-2.33066	1.81803e-05	0.340261	0.862044	119.975	199.117	393.801	53.63	81.4732	65.8071	78.309	52.5158	53.0333	5.53947
proteinId326208	PCON_13106	SMAC_01075	0.397761	0.611826	-0.128069	0.932211	-2.21489	0.000446617	-0.31085	0.999874	-0.584089	0.998971	-0.0966362	0.905814	-0.600399	0.810127	200.286	98.3673	150.862	22.8178	108.721	152.912	92.5043	36.8183	84.5871	38.7343
proteinId326288	PCON_08141	SMAC_03033	-1.12491	0.106214	0.701533	0.467382	0.827856	0.209434	0.0804566	0.999874	0.0502351	0.998971	0.306166	0.685515	-0.829805	0.696472	216.054	190.921	54.7557	143.349	103.894	110.707	105.171	18.3954	41.3667	29.4412
proteinId326306	PCON_12203	SMAC_00408	-2.83342	4.32665e-07	-0.32379	0.730522	0.056225	0.926562	-0.0902576	0.999874	-0.0841683	0.998971	-1.72286	0.00167845	0.337787	0.860857	13.9728	5.95577	1.06367	19.0149	21.423	25.7256	22.2667	10.7987	11.7022	1.56587
proteinId326352	PCON_02507	SMAC_07082	1.3214	0.0110357	1.60137	0.0053549	-1.55941	0.000889286	-0.103578	0.999874	-0.236362	0.998971	-2.53175	3.80571e-07	0.251494	0.907514	114.419	192.232	167.459	24.2819	83.484	101.301	78.6113	138.265	145.52	12.0345
proteinId326369	PCON_11055	SMAC_03876	-0.34477	0.553541	1.04689	0.0953745	-0.279587	0.614354	0.0624175	0.999874	-0.205002	0.998971	-1.34557	0.0109159	0.0831793	0.977818	25.3956	28.1276	11.1468	20.3787	32.068	34.6055	27.4961	12.3782	13.6568	2.66598
proteinId326384	PCON_12931	SMAC_00087	2.49251	1.91574e-10	1.48268	0.000800602	0.827368	0.0296781	-0.332317	0.999874	-0.392328	0.998971	1.06987	0.00797459	-0.125797	0.952957	35.1423	52.998	114.201	77.2571	42.7155	60.7994	42.4204	38.1318	49.7037	57.0733
proteinId326389	PCON_12157	SMAC_05775	-2.91626	1.09786e-10	-0.320456	0.674986	-0.972445	0.0263354	0.251772	0.999874	0.487372	0.998971	-2.92918	0.01085	-1.07646	0.638121	366.983	156.957	26.8986	48.4018	142.153	134.461	173.711	0.929471	3.08943	0
proteinId326405	PCON_10583	SMAC_00727	-1.03448	0.00184946	0.27983	0.584664	0.923913	0.00200065	-0.10344	0.999874	0.0826975	0.998971	-0.068463	0.860004	-0.576881	0.543361	156.692	102.599	43.3622	260.222	157.762	191.284	186.074	31.672	60.6222	29.56
proteinId326410	PCON_09800	SMAC_04897	0.291454	0.465696	0.546317	0.254249	1.66543	1.68082e-07	0.231641	0.999874	0.0113115	0.998971	-0.423533	0.284131	-0.348434	0.793568	58.535	45.9287	40.5201	136.493	62.5255	60.0096	55.4938	15.2348	23.5927	9.39889
proteinId326429	PCON_05221	SMAC_08879	1.57804	0.0383761	2.00525	0.0197272	-0.0419176	0.960062	0.11147	0.999874	0.685262	0.998971	-0.745581	0.347559	-0.351763	0.913354	296.248	668.687	518.857	76.2875	105.957	110.371	165.63	106.539	182.023	58.8229
proteinId326435	PCON_10061	SMAC_04391	2.46848	4.30664e-07	-0.490547	0.512508	-0.398232	0.445989	0.0298681	0.999874	-0.0389375	0.998971	0.170583	0.768135	0.106515	0.970852	46.3711	17.5511	149.024	31.9881	54.0163	59.6139	53.2849	37.0578	36.95	23.0341
proteinId326438	PCON_10062	SMAC_03158	-0.21889	0.517356	0.611399	0.0948212	0.244273	0.434753	0.162283	0.999874	0.436963	0.795326	-0.192156	0.613468	-0.0194457	0.994019	91.861	75.5954	44.9802	47.3011	55.4117	55.8283	69.4808	9.50636	12.0853	5.43263
proteinId326445	PCON_04679	SMAC_06484	-1.47588	4.9399e-06	0.450867	0.269243	0.700032	0.0194782	-0.519281	0.663721	-0.349258	0.998971	0.736909	0.0203761	0.308956	0.782175	37.7203	27.6488	7.61193	13.1066	6.93818	11.2725	8.11243	15.184	14.8585	12.8902
proteinId326487	PCON_02789	SMAC_08168	-4.75241	1.42543e-15	0.797379	0.164644	0.138324	0.784987	-0.532745	0.985602	0.00766219	0.998971	-4.05943	8.88233e-08	1.01163	0.421892	63.0424	59.174	1.22953	48.3623	37.4754	61.3926	56.5348	18.2224	11.7115	0.26419
proteinId326502	PCON_09869	SMAC_03243	-1.01012	0.217037	-0.493399	0.703815	0.997123	0.180033	0.112492	0.999874	-0.202702	0.998971	-0.788061	0.331932	1.11678	0.638121	17.7607	6.63793	4.81163	47.4032	31.6431	32.9085	26.068	24.4601	13.3295	3.48038
proteinId326512	PCON_01440	SMAC_04840	-4.08815	8.6474e-17	0.0619386	0.942796	2.43407	4.39916e-13	-0.206791	0.999874	-0.033759	0.998971	-2.31978	1.11629e-08	-0.0686933	0.976029	86.9272	48.8376	2.71508	260.152	51.2491	66.7316	59.9067	37.0076	44.225	4.53528
proteinId326526	PCON_07254	SMAC_01948	0.972886	0.274738	-0.248625	0.883851	0.0845093	0.928333	-0.204567	0.999874	-0.277304	0.998971	-4.11844	2.86602e-07	0.509189	0.863065	16.3079	7.29901	18.7019	25.8717	26.5301	34.6446	26.0057	54.9344	47.8863	1.06418
proteinId326546	PCON_11018	SMAC_00097	2.76205	1.40015e-10	-1.11836	0.0367778	0.125007	0.803586	-0.778085	0.538299	-1.25757	0.0438402	0.988716	0.0291544	-0.134056	0.956117	29.5556	7.19402	116.666	36.5697	24.1089	47.0077	17.844	12.3946	16.4247	17.1358
proteinId326594	PCON_12645	SMAC_02986	-1.84949	0.000320415	-0.140879	0.891158	1.51056	0.000962221	-0.308357	0.999874	-0.0286282	0.998971	1.453	0.00364426	0.320512	0.858488	46.2012	22.4231	7.10672	99.8744	34.9358	48.9817	44.0702	28.7731	30.1046	44.228
proteinId326625	PCON_05935	SMAC_05307	-1.40622	0.000115071	0.510225	0.303416	-0.456352	0.211985	0.556857	0.730704	0.357351	0.998971	0.780448	0.0340914	0.388652	0.762972	187.9	144.086	39.7721	51.2302	128.807	98.3619	116.086	268.753	246.414	218.062
proteinId326632	PCON_01073	SMAC_00908	0.234953	0.663923	-0.272375	0.747352	-0.152584	0.773071	0.0156125	0.999874	-0.247707	0.998971	-1.29639	0.00598233	-0.896983	0.503812	49.5172	21.9356	33.007	74.0449	104.261	116.279	89.5743	20.9778	52.0845	10.6777
proteinId326653	PCON_03289	SMAC_06287	1.87034	0.0308881	0.319123	0.84793	2.5914	0.00118619	-0.341702	0.999874	-1.07842	0.996083	-0.102149	0.91974	2.44638	0.121943	22.9353	15.5879	50.6443	12.4526	1.77447	2.60141	1.07076	76.8693	18.0014	9.05326
proteinId326717	PCON_04985	SMAC_03134	2.77336	1.51847e-07	-1.33997	0.0378375	-0.974056	0.0605387	0.0229746	0.999874	-0.304719	0.998971	0.787209	0.162148	0.011022	0.995399	31.3453	6.48708	125.862	22.7422	56.795	63.0804	46.591	69.255	85.719	70.4639
proteinId326729	PCON_09871	SMAC_02849	0.204304	0.650814	0.996011	0.0322059	-3.40605	7.24192e-22	0.624437	0.676567	0.32819	0.998971	-3.719	1.27864e-21	0.232603	0.875612	252.388	271.231	164.913	13.2276	275.259	200.657	231.572	160.746	176.425	6.82098
proteinId326743	PCON_11172	SMAC_03844	1.91472	0.000427579	-1.05904	0.123152	-1.39324	0.00653982	-0.0936912	0.999874	0.472092	0.998971	-0.0863793	0.894042	1.07538	0.494199	42.2927	10.6696	92.7235	9.52775	29.4846	35.484	45.352	51.0958	30.8054	13.4511
proteinId326774	PCON_13276	SMAC_07419	1.54192	0.0561687	2.95021	0.000492008	-1.20997	0.111205	0.535771	0.999874	0.628529	0.998971	-3.12712	3.9745e-05	0.341298	0.919877	1272.17	5702.42	2188.57	286.082	1242.8	952.063	1376.74	1451.17	1475.82	86.6668
proteinId326799	PCON_07529	SMAC_04834	-0.527863	0.382526	-0.0554213	0.969184	-1.37889	0.00697507	-0.0808164	0.999874	-0.621531	0.998971	-1.40346	0.0133757	-0.109762	0.972532	63.183	32.3329	24.684	40.1296	124.617	148.708	88.0555	11.2721	14.8719	3.1277
proteinId326855	PCON_05430	SMAC_01106	1.15983	0.153955	-0.436381	0.75167	0.862989	0.269115	-0.246563	0.999874	-0.307174	0.998971	0.814218	0.321772	0.402907	0.900996	51.3476	20.1176	67.0348	27.5055	15.2539	20.5685	15.1178	16.1563	15.7197	16.1355
proteinId326910	PCON_11991	SMAC_08833	-2.27638	1.4215e-05	1.78652	0.00227983	-0.570847	0.29286	0.185769	0.999874	0.14497	0.998971	-3.40695	2.50553e-11	0.365768	0.84651	137.002	261.156	15.6618	17.4792	36.7458	36.3654	36.9332	310.067	258.151	13.3031
proteinId326983	PCON_12933	SMAC_07333	0.468891	0.418687	-0.370135	0.67136	2.0318	1.81518e-05	-0.21742	0.999874	0.0802243	0.998971	-0.558747	0.31808	0.0959048	0.975216	339.869	140.256	267.443	777.046	198.08	260.685	253.035	261.717	297.705	112.346
proteinId327004	PCON_13714	SMAC_05204	-2.76001	9.74717e-07	-0.198749	0.859777	1.08972	0.0426243	0.221841	0.999874	0.305345	0.998971	-2.1107	0.000206453	-0.771847	0.667657	130.233	60.5146	10.3464	178.585	121.79	117.536	133.863	14.6217	31.6274	3.96448
proteinId327007	PCON_13357	SMAC_01319	3.50026	7.82548e-10	2.44836	9.50499e-05	-0.383154	0.540138	0.552877	0.999874	0.442927	0.998971	0.838177	0.171312	0.405747	0.84651	1064.75	3236.54	7192.39	442.637	1056.55	805.518	1011.3	1212.35	1266.45	1187.85
proteinId327015	PCON_02959	SMAC_01723	-2.52599	0.000103011	-0.698017	0.459293	-0.358057	0.610549	-0.407561	0.999874	-0.528695	0.998971	-1.37293	0.0415471	-0.0452298	0.993358	28.6687	9.31772	2.6478	47.297	57.3111	86.4551	54.3359	6.50074	9.25123	1.5498
proteinId327212	PCON_02872	SMAC_01145	-0.186754	0.818874	0.404351	0.743406	0.432341	0.56024	0.0229933	0.999874	-0.325461	0.998971	-1.99907	0.00377281	0.663585	0.788469	24.5238	17.601	12.1858	94.3266	88.1484	97.6616	70.9986	50.5775	37.8581	4.24088
proteinId327266	PCON_13062	SMAC_01933	0.445025	0.644493	1.04615	0.37748	0.842834	0.332836	-0.146549	0.999874	0.216331	0.998971	-5.50791	8.41737e-11	0.752743	0.8059	70.4329	82.4408	56.0658	16.2966	9.82875	12.3603	13.2479	62.0285	44.2389	0.343315
proteinId327285	PCON_02101	SMAC_01392	0.177847	NA	-0.0332749	NA	0.164493	NA	-0.428471	NA	-0.457894	NA	-5.87715	NA	1.2058	NA	47.4835	24.6344	30.1775	21.6063	17.5383	26.9147	17.742	540.347	267.29	1.90143
proteinId327302	PCON_05357	SMAC_00424	0.9918	0.0407155	0.254545	0.765307	0.087398	0.871797	-0.0748556	0.999874	-0.410721	0.998971	1.68612	0.000265528	-0.113036	0.966543	24.588	15.7466	27.9398	61.2595	67.9399	80.6745	55.485	11.9138	16.6312	29.0306
proteinId327342	PCON_08636	SMAC_00310	-0.111662	0.854556	-0.464672	0.55188	0.718582	0.147228	1.40098	0.0550821	0.854092	0.585887	3.63273	6.13697e-14	0.375437	0.841038	26.621	10.2812	13.9604	28.478	56.9853	23.9307	40.2029	17.8431	15.9655	102.848
proteinId327351	PCON_01994	SMAC_00540	-0.41754	0.637514	0.243423	0.875716	2.13255	0.00252721	0.298895	0.999874	-0.233925	0.998971	-2.56427	0.00132497	-0.312976	0.927488	19.9935	12.6495	8.38667	68.0375	23.2493	21.1731	16.3916	8.63958	13.0554	0.940381
proteinId327372	PCON_07070	SMAC_02324	0.0366229	NA	-0.474747	NA	-0.322622	NA	-0.761289	NA	-0.983372	NA	1.71187	NA	0.239316	NA	35.0734	13.2901	20.2855	46.1603	42.0737	81.9487	37.0572	31.3236	32.6015	51.6836
proteinId327387	PCON_04017	SMAC_04505	0.726739	0.478203	-1.05881	0.422243	-2.44125	0.00444003	-0.0522041	0.999874	-0.377051	0.998971	-1.23466	0.199951	0.687868	0.836041	22.799	5.56702	21.9261	5.0592	35.544	41.6116	28.9101	123.142	94.078	16.7844
proteinId327391	PCON_05319	SMAC_07802	1.88053	0.0175707	-0.262429	0.86615	-0.157767	0.860543	-0.124171	0.999874	-0.253511	0.998971	-5.35733	1.35477e-08	1.23661	0.610647	11.7321	5.19951	25.8411	21.4637	27.7985	34.2541	26.2491	15.2313	7.8174	0.0490083
proteinId327394	PCON_06874	SMAC_01975	1.77878	0.000350853	0.101438	0.92597	3.11395	1.23342e-12	-0.183485	0.999874	-0.242891	0.998971	0.293469	0.598495	0.0105418	0.995399	32.4585	18.8078	64.851	194.635	23.8952	30.6564	23.7603	27.7384	37.2887	21.0402
proteinId327437	PCON_08441	SMAC_08050	-2.09587	0.000177457	2.50361	1.41962e-05	0.36225	0.534109	-2.09364	0.00137988	-1.49406	0.0599174	2.45085	4.39942e-06	0.748406	0.667404	50.9659	161.693	6.66427	71.943	15.6341	77.833	24.7592	45.7908	33.8348	99.5317
proteinId327454	PCON_02915	SMAC_02469	0.220247	0.681033	0.758929	0.214233	0.192132	0.707863	0.470184	0.999874	0.595503	0.932074	-0.555417	0.257868	-0.185091	0.929374	65.6796	59.8838	43.1232	125.892	190.213	154.143	214.797	95.2473	132.159	48.9038
proteinId327468	PCON_11360	SMAC_04070	0.392245	0.524624	-0.0387143	0.976433	-0.416156	0.468863	-0.441684	0.999874	-0.424645	0.998971	1.03208	0.0647152	0.0445663	0.99246	41.0537	21.2875	30.3413	70.7037	86.4464	132.978	90.6051	40.6795	49.8909	56.8769
proteinId327487	PCON_13468	SMAC_02450	0.467621	0.536308	1.41772	0.0839356	0.343033	0.639771	0.189615	0.999874	0.175811	0.998971	-2.66782	5.01975e-05	-0.592382	0.809329	125.998	186.06	99.6418	78.8447	87.615	86.3798	89.6673	73.8356	137.078	11.7565
proteinId327498	PCON_08032	SMAC_00205	-1.57857	0.0667571	-0.673365	0.60751	-1.57415	0.0459807	0.263702	0.999874	0.0638722	0.998971	0.709893	0.428738	1.68756	0.465336	20.787	6.80736	3.71261	12.4264	58.1295	54.0907	52.0474	60.0029	20.86	16.4051
proteinId327518	PCON_13261	SMAC_07975	1.33654	0.0158278	0.862214	0.232057	3.52182	1.51341e-13	-0.595915	0.999874	-0.412474	0.998971	1.1742	0.0317016	0.959264	0.535623	54.7074	53.9869	79.4665	755.269	52.2873	89.9005	61.7838	312.452	187.856	213.771
proteinId327568	PCON_02963	SMAC_07858	0.632744	0.359594	0.627968	0.502819	0.279973	0.690308	-0.0689907	0.999874	-0.0549371	0.998971	-4.41932	3.1317e-11	-1.15993	0.523074	58.7698	49.0306	51.9877	37.0998	35.8673	42.5256	37.4824	10.0565	27.4658	0.661106
proteinId327582	PCON_03881	SMAC_06333	0.969818	NA	0.763615	NA	0.089655	NA	0.13697	NA	0.638513	NA	0.30901	NA	-0.634053	NA	766.29	705.459	859.378	183.999	236.205	241.823	347.226	146.845	315.365	192.334
proteinId327584	PCON_09223	SMAC_00927	-0.53275	0.500704	-1.09473	0.246491	2.28295	0.000398448	0.132652	0.999874	-0.0286652	0.998971	-1.6844	0.0178984	-1.1461	0.585987	43.5359	10.669	16.9024	84.9427	23.2272	23.8042	21.4343	18.8372	56.7852	7.63315
proteinId327610	PCON_08275	SMAC_12600	-4.24832	2.61389e-15	-1.7969	0.000310379	0.486416	0.274315	-0.370285	0.999874	-0.863589	0.362302	2.29318	7.93669e-08	0.0960895	0.970749	56.6993	8.58622	1.53153	79.2609	54.1942	79.1544	39.6531	31.6115	36.2669	95.5645
proteinId327629	PCON_07418	SMAC_02155	0.032781	0.975142	-0.0296688	0.988332	-2.23271	0.00213457	-0.265936	0.999874	-0.00090663	0.999642	0.518992	0.559346	-0.422361	0.900996	25.0784	13.1988	14.6953	3.50809	17.4221	23.8263	21.8297	2.4149	4.11126	2.65004
proteinId327661	PCON_12755	SMAC_05633	2.78695	1.54958e-08	0.148334	0.886604	-0.926328	0.0624217	0.513842	0.999874	0.588448	0.998971	-0.0925774	0.877402	0.105253	0.971541	52.571	31.1739	211.283	7.67728	25.9842	20.3953	28.366	36.9451	39.1337	18.6512
proteinId327665	PCON_12977	SMAC_03851	1.78019	2.76123e-08	-0.236564	0.669443	1.62209	2.93559e-08	-0.0273106	0.999874	0.1609	0.998971	-0.799349	0.0171593	-0.596886	0.523637	24.5878	11.1287	48.1029	63.0605	24.8653	28.5571	29.3816	20.1875	36.7364	11.3175
proteinId327704	PCON_13978	SMAC_02078	-1.49997	0.0272326	1.50274	0.0552129	-0.0327756	0.964264	0.200866	0.999874	0.372793	0.998971	0.423779	0.557483	0.489112	0.836041	180.84	283.634	35.1189	89.1598	130.015	127.074	152.174	145.789	140.583	101.626
proteinId327714	PCON_13626	SMAC_02606	1.31401	NA	2.8828	NA	-1.49024	NA	0.408166	NA	0.213819	NA	-1.68779	NA	-0.514258	NA	759.419	3190.69	1100.62	126.941	609.978	513.208	548.575	387.063	710.237	120.916
proteinId327775	PCON_10402	SMAC_01872	-0.402876	0.621728	-0.601286	0.592209	0.262473	0.742204	0.059397	0.999874	0.453092	0.998971	1.82322	0.010892	0.0861055	0.986407	192.157	67.3169	82.3526	85.2487	91.6116	98.9963	126.071	39.3691	50.7236	101.074
proteinId327797	PCON_05923	SMAC_08326	1.70823	0.0160338	1.22585	0.169814	-1.30561	0.049751	0.272707	0.999874	0.0573341	0.998971	-1.00286	0.167524	0.124095	0.975844	312.113	400.843	600.962	32.0903	122.102	113.337	108.235	108.924	126.568	34.9862
proteinId327800	PCON_05370	SMAC_04773	0.824623	0.299999	-1.42372	0.121882	1.3634	0.0511432	1.7891	0.139003	0.597242	0.998971	0.154648	0.857509	0.198588	0.959679	48.018	9.09569	48.8478	250.006	424.88	132.666	186.935	73.7618	77.0048	40.5273
proteinId327806	PCON_02222	SMAC_04249	2.16681	6.23414e-07	0.203528	0.809648	2.81916	1.78488e-12	0.0261042	0.999874	-0.253295	0.998971	1.72123	7.25913e-05	-0.119762	0.959679	75.5457	46.9304	196.216	95.1385	16.6627	18.4541	14.2039	57.9328	83.1072	139.249
proteinId327842	PCON_10346	SMAC_01901	-0.141863	0.79745	-0.536301	0.431648	1.31813	0.0024031	-0.313527	0.999874	-0.192297	0.998971	2.88667	2.46757e-10	-0.781325	0.584868	145.889	53.5283	74.661	257.879	101.906	143.197	114.954	19.3301	43.3319	177.678
proteinId327870	PCON_03488	SMAC_02793	0.0603462	0.917891	0.138574	0.886604	0.0666094	0.902602	0.0976407	0.999874	0.189545	0.998971	0.618989	0.220711	-0.369279	0.830072	39.4044	23.2011	23.2164	47.7595	61.1311	64.3956	67.5078	8.96185	13.4877	11.7241
proteinId327875	PCON_13757	SMAC_06911	3.81516	2.55364e-07	2.3794	0.00525138	0.241217	0.778924	0.733997	0.999874	0.48774	0.998971	0.306683	0.72494	0.699202	0.799532	1065.22	3171.82	9427.36	1063.08	1868.24	1241.29	1618.92	2958.63	2474.89	1657.71
proteinId327895	PCON_02123	SMAC_01769	1.81896	3.51099e-06	-0.0378518	0.969622	0.571628	0.145972	-0.651538	0.646226	-0.953591	0.154825	0.46596	0.278617	0.597124	0.638121	35.5588	18.4436	71.3918	23.7314	12.5315	22.3363	10.4956	16.9322	13.6493	10.1889
proteinId327902	PCON_11040	SMAC_03175	1.39702	0.00514848	-0.1313	0.896586	-3.41894	8.55316e-14	0.0791199	0.999874	-0.0657217	0.998971	-6.36395	3.88053e-12	0.712424	0.662986	196.485	95.8878	297.746	4.43782	68.1177	72.5995	63.6953	22.2131	14.7146	0.0343979
proteinId327979	PCON_12365	SMAC_04208	-0.728162	0.199194	-1.41406	0.0250324	-0.0772628	0.889659	-0.242339	0.999874	-0.922877	0.400841	-0.189947	0.734357	0.167795	0.942902	4.29095	0.841177	1.43116	69.2376	77.4335	103.45	49.6875	45.9254	48.4179	22.8234
proteinId327980	PCON_02484	SMAC_02965	1.40724	0.0555999	-1.48091	0.0900605	2.33506	0.000330879	-0.417037	0.999874	-0.582936	0.998971	-2.4112	0.000616308	0.548936	0.830072	79.4438	15.005	125.584	95.5478	16.5399	25.1754	15.2147	75.6974	63.973	5.24405
proteinId327983	PCON_03855	SMAC_05539	-0.0441311	0.956574	2.30247	0.000623175	0.0616256	0.930369	0.0592273	0.999874	0.204087	0.998971	-2.05499	0.000742743	0.722369	0.732755	612.797	1704.99	339.089	144.56	177.954	192.261	204.428	813.732	698.156	80.9962
proteinId327996	PCON_14158	SMAC_02992	1.43967	0.00137816	0.0161447	0.989739	0.427309	0.356493	0.597879	0.888379	0.375269	0.998971	0.23678	0.643315	0.382966	0.813004	31.511	17.0581	49.0655	23.8274	33.3534	24.7294	29.5653	23.9599	21.5818	12.7355
proteinId328016	PCON_03124	SMAC_03532	0.878637	0.388702	-0.21472	0.915026	0.221586	0.837584	1.39652	0.743465	1.20104	0.928018	0.524305	0.613302	-0.48	0.902506	13.3208	6.1651	14.5771	6.1672	18.0849	7.27932	16.2499	8.84314	16.4516	10.3785
proteinId328022	PCON_13721	SMAC_06261	-2.76682	1.55324e-07	1.26458	0.0177684	0.102947	0.844705	0.184913	0.999874	0.234296	0.998971	-4.39053	7.04739e-09	-0.782808	0.610647	13.3688	17.4189	1.04958	21.975	28.8899	28.618	30.9687	2.99869	6.40171	0.126952
proteinId328034	PCON_02218	SMAC_02815	-4.39819	0.000281931	-0.528728	0.619197	2.23512	9.69886e-06	0.474559	0.999874	0.091575	0.998971	-0.436706	0.540762	-0.837567	0.679666	7.34687	2.68995	0	150.385	54.922	44.2041	43.4655	5.02629	13.0875	4.85413
proteinId328041	PCON_13521	SMAC_01096	-2.57466	0.00028111	0.750092	0.453004	-1.57461	0.0176987	0.364114	0.999874	-0.298298	0.998971	-3.20674	2.51699e-06	1.15968	0.572056	29.2836	26.5747	2.60116	3.68429	18.3923	15.9726	11.8726	122.122	62.5064	3.07482
proteinId328083	PCON_08592	SMAC_05285	-2.33096	7.05937e-06	0.300639	0.731195	1.09599	0.0183375	0.0423595	0.999874	0.0540391	0.998971	0.799329	0.118397	-0.298814	0.870155	92.0398	61.2211	9.97932	84.3964	50.0554	54.7215	52.1895	29.282	44.5869	41.6016
proteinId328090	PCON_13169	SMAC_00794	0.342633	0.715591	-0.945714	0.41694	0.447837	0.613434	-0.12435	0.999874	-0.179094	0.998971	0.326533	0.726404	0.562571	0.84651	75.7588	20.3873	54.8977	75.8483	61.9453	76.4892	61.6782	207.269	179.131	128.337
proteinId328095	PCON_13378	SMAC_02326	0.801375	0.363595	-0.32832	0.83382	0.305281	0.73443	0.245137	0.999874	0.338594	0.998971	-4.59267	4.98255e-09	0.58433	0.841038	37.4335	15.7765	37.6725	86.2719	103.371	97.5103	114.626	181.75	150.261	2.38616
proteinId328102	PCON_07772	SMAC_04806	0.776429	0.192614	0.595896	0.463015	-0.615608	0.274215	0.335817	0.999874	0.0957116	0.998971	0.388152	0.524824	0.0923019	0.977818	14.4612	11.7469	14.1305	12.9164	31.2505	27.7785	27.2815	35.2735	40.9879	25.4467
proteinId328110	PCON_06453	SMAC_08354	0.891473	0.0583579	-0.812554	0.164644	-1.01593	0.0189205	0.122112	0.999874	0.0379035	0.998971	-2.31409	2.54392e-07	0.0225402	0.994019	64.0837	19.4336	68.1984	10.9874	30.4655	31.53	29.6979	38.3678	44.6557	4.86955
proteinId328119	PCON_02002	SMAC_05867	1.80461	0.0155225	-0.175879	0.910608	-0.299616	0.711487	-0.147761	0.999874	-0.205797	0.998971	-1.26058	0.0957558	1.13741	0.626306	65.1001	30.825	136.316	43.1286	59.4745	74.5573	59.0718	80.5629	43.2023	8.08251
proteinId328123	PCON_12966	SMAC_04300	0.293812	0.710751	0.168307	0.907333	0.470251	0.517927	0.167727	0.999874	0.0292841	0.998971	-0.366936	0.635984	-1.26034	0.523074	36.3877	22.1073	25.5536	61.3933	62.0563	62.0245	58.2113	5.95887	17.5635	8.04451
proteinId328134	PCON_09413	SMAC_03535	0.940004	0.0042708	0.154628	0.797179	-1.18807	5.5942e-05	0.178623	0.999874	0.0719931	0.998971	0.394128	0.253247	0.101254	0.952957	79.4331	47.2668	86.1279	44.9112	144.941	144.147	139.079	54.1857	61.3127	40.7565
proteinId328183	PCON_11957	SMAC_02540	0.888924	0.0655302	0.726487	0.240644	-0.715474	0.112475	0.601929	0.909602	0.433064	0.998971	-0.276122	0.594189	0.220339	0.913354	22.9989	20.3606	24.2626	19.0724	59.5778	44.0431	54.7151	25.2087	24.5176	10.7771
proteinId328267	PCON_13367	SMAC_00562	2.76403	NA	2.69519	NA	-1.06657	NA	0.754817	NA	0.434885	NA	-1.82	NA	0.471832	NA	1305.93	4793.02	5325.69	331.656	1510.04	993.164	1242.79	649.827	649.675	92.3493
proteinId328297	PCON_13982	SMAC_06770	3.07645	2.72218e-14	-0.594744	0.300794	1.82852	1.14299e-06	0.0890216	0.999874	0.0158733	0.998971	3.63364	4.26362e-19	0.763323	0.535623	78.2389	27.5555	382.647	326.817	121.329	128.574	119.466	18.1303	12.7377	90.908
proteinId328298	PCON_05683	SMAC_01475	1.69237	0.00846197	0.942167	0.267581	1.48722	0.0118966	-0.35148	0.999874	-0.562237	0.998971	-0.11568	0.876407	0.0722594	0.986473	30.4798	31.8115	57.5652	79.566	26.6773	38.6957	23.6889	22.4147	26.6481	11.5505
proteinId328366	PCON_13317	SMAC_01146	2.28536	0.00635973	-0.0631531	0.975085	0.765318	0.372242	0.45081	0.999874	0.719538	0.998971	-1.43393	0.09196	-0.10353	0.985991	168.345	85.9656	499.939	142.573	141.951	115.237	178.544	123.53	172.919	34.7776
proteinId328370	PCON_13181	SMAC_12704	1.02782	0.212088	0.649106	0.589942	3.11482	7.06171e-06	0.0982498	0.999874	0.104023	0.998971	-5.00052	6.41968e-10	-0.0882491	0.986449	462.026	397.037	549.475	1514.2	219.664	230.82	228.229	132.968	190.336	2.47924
proteinId328377	PCON_08434	SMAC_01910	0.236647	0.507582	0.194957	0.724528	2.42876	1.41341e-18	0.476285	0.743465	0.384149	0.9846	-1.3995	1.26612e-05	0.153411	0.91234	87.7262	54.0366	58.7916	181.192	57.3721	46.4318	55.6128	56.1769	61.1095	11.8841
proteinId328387	PCON_09222	SMAC_03607	0.25957	0.721343	0.724252	0.424323	-0.657804	0.308631	-1.2519	0.369195	-0.651672	0.998971	-0.461435	0.506746	-0.979952	0.629182	179.888	161.63	122.373	75.8075	61.4214	168.968	97.6597	61.6652	148.352	62.0881
proteinId328391	PCON_13289	SMAC_05130	0.0586199	0.916631	0.732052	0.222987	-2.0673	4.41734e-07	0.106942	0.999874	-0.149605	0.998971	-1.28242	0.0047039	-0.110818	0.965819	188.675	168.679	111.233	28.0162	159.428	166.781	137.729	105.604	144.773	31.8215
proteinId328435	PCON_13549	SMAC_03190	-0.097934	0.896148	-0.0193418	0.991996	1.14449	0.0522784	-0.269248	0.999874	-0.388332	0.998971	-1.81099	0.00329926	0.671424	0.762972	73.2306	38.5829	38.6343	42.6868	19.3567	26.4568	18.3796	62.3705	45.8887	6.05485
proteinId328475	PCON_10878	SMAC_08083	0.911774	0.0917611	-0.421152	0.6093	-1.51595	0.00149827	0.0463975	0.999874	0.0618025	0.998971	-0.948477	0.0727077	-0.835532	0.587871	43.7385	17.4507	47.6024	14.3634	53.2635	58.0649	55.6708	52.5456	106.581	30.9677
proteinId328480	PCON_07699	SMAC_07282	-1.7726	0.0176889	-0.502884	0.680467	1.5273	0.0276627	-0.687668	0.999874	1.16305	0.692691	-2.74683	0.000132383	1.48318	0.472872	308.958	117.625	50.3242	88.0258	22.2557	41.286	87.0707	310.717	125.501	8.46514
proteinId328498	PCON_07882	SMAC_07378	1.84895	0.00481003	-0.552571	0.588524	-2.23195	0.000165443	-1.34345	0.317703	-1.12269	0.542447	-3.7007	4.21975e-09	-0.0601602	0.989753	24.1968	8.60202	50.4786	6.91972	16.097	47.3675	19.4872	43.9527	54.849	1.88761
proteinId328512	PCON_01468	SMAC_01782	0.104663	0.916631	0.52735	0.703815	1.85183	0.0143651	0.102236	0.999874	0.204761	0.998971	2.70327	0.000777514	0.196628	0.966543	16.5404	13.1184	10.2623	110.34	39.3959	41.2454	44.0019	3.6732	4.44971	17.4248
proteinId328515	PCON_03356	SMAC_08103	0.0460081	0.948805	-0.0214332	0.98822	1.69035	0.000764923	0.27371	0.999874	0.0579079	0.998971	-0.531089	0.367687	0.110379	0.972532	31.1882	16.4413	18.1762	142.477	66.2431	61.5325	58.8237	73.9748	80.5706	27.532
proteinId328527	PCON_01969	SMAC_08293	0.9748	0.0365045	1.20159	0.0226675	1.7077	2.82207e-05	-0.280494	0.999874	0.107832	0.998971	0.0902692	0.865655	-0.136101	0.955175	56.9769	71.4785	64.4505	133.585	41.0469	56.4194	55.9141	36.7891	51.8761	28.9395
proteinId328531	PCON_01968	SMAC_03661	-0.447488	0.365387	-0.788005	0.176922	1.21343	0.00383578	0.163875	0.999874	0.242963	0.998971	-1.64212	0.0200531	-0.38625	0.84651	211.718	65.618	88.4182	89.3588	53.2567	53.5837	58.3435	1.4923	1.85054	0.380067
proteinId328548	PCON_02936	SMAC_02852	0.297687	0.464797	-1.42504	0.000412466	1.96028	1.56633e-09	-0.172052	0.999874	0.0116859	0.998971	-1.51241	0.000133577	-0.23417	0.866776	59.3655	11.7379	41.3642	95.5731	26.9328	34.2766	31.7181	9.33608	13.4528	2.50596
proteinId328550	PCON_02808	SMAC_04230	-1.34866	0.0961128	4.19639	1.30601e-07	1.72148	0.0180712	1.44158	0.440266	2.44173	0.0152947	-1.51947	0.0537693	0.51874	0.848841	377.588	4279.27	83.4267	945.147	971.233	386.275	2073.89	300.776	260.515	44.5648
proteinId328618	PCON_07646	SMAC_02426	0.31773	0.686712	-1.7266	0.0328445	-4.41228	8.2284e-12	-0.0439428	0.999874	-0.34923	0.998971	-2.85497	2.44408e-05	0.110306	0.977818	128.005	20.336	92.5545	2.05347	53.5589	62.2969	44.5395	45.403	52.4686	3.17633
proteinId328622	PCON_10447	SMAC_00355	1.60175	5.21924e-05	-1.06018	0.0301908	0.0103158	0.981019	0.256674	0.999874	-0.404817	0.998971	-0.301016	0.497639	0.255295	0.858103	10.0621	2.57786	17.5366	5.48478	8.05129	7.58587	5.22849	9.40352	10.1251	4.10666
proteinId328638	PCON_09786	SMAC_09604	-0.685522	0.15926	-0.780888	0.188063	-1.49522	0.000285714	-0.142576	0.999874	-0.41207	0.998971	-1.85511	6.18538e-05	0.105889	0.967512	24.3497	7.54249	8.50352	18.9307	60.6312	75.4424	51.9201	14.9339	16.249	2.2175
proteinId328644	PCON_02942	SMAC_04272	-0.657186	0.37718	-0.541714	0.618344	-1.2959	0.0455033	-0.116002	0.999874	-0.150009	0.998971	0.107334	0.893767	-0.0323044	0.994019	174.244	63.2244	61.4494	51.0038	146.516	179.414	148.073	112.863	147.225	90.4041
proteinId328654	PCON_11988	SMAC_05577	0.236735	0.665444	-1.45684	0.00820914	2.60194	7.64162e-10	0.79091	0.611289	0.587888	0.972975	-1.85882	0.00315421	-0.681401	0.696472	57.8454	11.2233	39.2231	140.184	49.3281	31.8945	44.3889	2.81845	5.95745	0.836253
proteinId328690	PCON_07819	SMAC_09270	0.278036	0.662662	-1.47215	0.0250892	-0.388741	0.507356	0.146176	0.999874	0.310559	0.998971	-3.40438	7.26968e-07	0.46146	0.822807	48.2001	9.13462	33.4006	21.2017	38.4467	39.0948	44.7315	12.6057	9.15424	0.423526
proteinId328704	PCON_01467	SMAC_03991	0.631931	0.244876	0.21602	0.821985	-2.51221	3.2277e-06	-0.00690779	0.999874	0.127347	0.998971	0.612259	0.257756	0.0269095	0.994019	154.103	96.4733	137.034	1.39962	10.2116	11.5758	11.6044	24.7099	31.8955	23.2062
proteinId328738	PCON_13318	SMAC_08141	1.2405	0.138477	1.56897	0.111119	2.40157	0.000978043	-0.190938	0.999874	0.159873	0.998971	0.14088	0.879746	-0.109535	0.982337	169.504	284.379	237.868	294.947	56.9961	73.9321	76.127	38.2044	52.2421	33.3147
proteinId328764	PCON_13198	SMAC_02497	-1.15167	NA	0.600909	NA	1.55216	NA	-0.734126	NA	1.23209	NA	0.0674701	NA	0.457173	NA	263.175	214.662	63.4667	83.906	19.8227	38.4321	87.5548	78.5073	74.9018	43.3726
proteinId328773	PCON_03747	SMAC_03257	2.51544	3.04775e-07	1.41788	0.0142285	1.67118	0.000252496	-0.119558	0.999874	-1.22029	0.131608	-0.756735	0.15137	-0.743515	0.641507	59.3284	86.9894	200.522	1015.63	357.594	438.338	171.06	29.9004	63.5759	18.4345
proteinId328780	PCON_13254	SMAC_02339	-1.22701	0.0271113	0.718069	0.324603	-2.20875	8.32669e-06	0.486657	0.999874	0.503467	0.998971	1.37153	0.0101603	0.107176	0.972532	29.1882	25.8958	6.91947	5.21528	41.4423	33.1405	43.332	21.0221	21.9608	31.7244
proteinId328793	PCON_09603	SMAC_03963	0.68463	0.183519	-0.810296	0.201884	1.86642	1.55046e-05	-0.522241	0.999874	-0.44535	0.998971	0.549455	0.284733	0.100347	0.971541	29.3852	8.83997	26.9518	123.689	28.9598	47.1804	31.6934	19.141	21.0142	15.4459
proteinId328797	PCON_09835	SMAC_08484	0.119131	0.894285	0.0112785	0.996377	-2.31863	0.000546528	-0.842661	0.999874	-0.417105	0.998971	-2.22514	0.00209877	-0.224892	0.952957	115.966	62.7942	71.5131	74.1205	266.874	553.026	375.716	257.145	449.213	43.7363
proteinId328803	PCON_11970	SMAC_00068	2.12653	0.000155057	-0.00412623	0.997209	3.47252	3.77549e-12	-0.398175	0.999874	-0.175074	0.998971	2.79822	3.14485e-07	-0.754028	0.675837	50.0724	26.7644	127.861	472.268	38.5086	57.518	46.5463	14.4792	30.124	123.348
proteinId328804	PCON_08115	SMAC_08454	1.53071	9.78309e-05	1.22389	0.00633741	0.192652	0.661045	0.331595	0.999874	0.269102	0.998971	-0.772679	0.0592955	-0.622245	0.626059	51.3592	64.953	85.7165	25.0994	34.4155	30.7555	34.0986	22.7482	43.8538	13.5515
proteinId328830	PCON_06035	SMAC_04568	-1.11686	0.132701	-0.724292	0.482778	-0.286012	0.711683	-0.316101	0.999874	-0.220329	0.998971	-1.91045	0.00656255	1.21971	0.543361	36.0506	11.4641	9.1281	30.2644	36.8925	52.1669	40.8915	67.312	32.0904	3.98033
proteinId328839	PCON_03430	SMAC_09439	2.83348	1.34063e-06	-0.507762	0.598569	1.49765	0.00809476	0.273199	0.999874	-0.113409	0.998971	-3.3982	6.07039e-06	-0.169269	0.959679	13.8246	5.19106	58.7364	17.2586	8.99869	8.35714	7.07669	3.73239	4.41972	0.22858
proteinId328882	PCON_08688	SMAC_03218	-1.95763	0.0069315	-0.86544	0.387485	-2.83953	8.27758e-06	-1.12862	0.655741	-0.906314	0.93154	-0.490019	0.528128	0.31692	0.917839	32.1845	9.22793	4.47848	26.6315	111.639	281.624	135.551	37.2727	36.572	11.8871
proteinId328905	PCON_02449	SMAC_00611	1.72824	0.00795457	-0.446868	0.676301	-0.0229388	0.973535	-0.175639	0.999874	0.0602041	0.998971	-0.668733	0.329591	0.224553	0.941647	394.628	154.042	766.296	126.142	139.66	178.555	171.039	264.084	311.661	101.881
proteinId328919	PCON_10457	SMAC_04901	1.55536	0.00307377	-0.0207324	0.988153	0.989297	0.0455033	-0.00153824	0.999874	0.163753	0.998971	-0.0118467	0.984198	-0.26945	0.902403	37.5366	19.813	63.5036	110.308	68.5007	77.2354	79.5903	136.858	198.007	95.5115
proteinId328931	PCON_07905	SMAC_00950	3.93737	9.27875e-32	-0.382641	0.456146	0.39532	0.267562	-0.556395	0.682387	-0.410196	0.998971	-0.380543	0.314118	0.605608	0.564047	370.49	152.231	3298.78	487.251	312.784	519.519	358.511	222.561	175.639	68.3113
proteinId328973	PCON_02121	SMAC_08123	-0.310155	0.762882	-0.0683994	0.974969	1.91564	0.0229367	-0.0542167	0.999874	-0.262118	0.998971	-3.3889	0.000112519	1.14588	0.688801	37.3974	19.2205	16.8039	146.764	44.378	52.0414	39.4691	237.463	127.726	4.72189
proteinId328988	PCON_02745	SMAC_03989	2.56573	0.00127498	-0.176621	0.917809	1.84956	0.0131253	-0.540406	0.999874	-0.329369	0.998971	-0.303107	0.741226	1.98145	0.250924	57.9337	27.3459	209.82	89.0583	19.6832	32.8774	23.7116	149.776	43.4212	15.9079
proteinId328996	PCON_07183	SMAC_08401	-0.700255	0.142361	0.0268797	0.981034	-0.996355	0.0184119	-0.195186	0.999874	-0.206863	0.998971	-0.507063	0.288675	0.446957	0.778239	49.7804	27.0843	17.1733	22.5712	49.1962	63.5703	50.4165	71.5067	61.4774	21.6804
proteinId329020	PCON_02067	SMAC_02231	1.32401	0.0341281	0.245324	0.834788	-1.10139	0.0614357	-0.5972	0.999874	-0.27559	0.998971	-1.48838	0.0150508	-0.666611	0.762972	505.985	325.083	738.928	39.3827	69.573	119.93	90.4942	147.688	347.355	55.311
proteinId329022	PCON_02977	SMAC_02796	1.68946	0.00072352	0.0671186	0.955607	-1.47558	0.00143866	0.0204311	0.999874	-0.223351	0.998971	-0.118234	0.842275	0.203414	0.927488	29.4426	16.5309	54.9963	9.22429	32.6541	36.2746	28.424	16.2497	15.8918	7.58631
proteinId329025	PCON_05604	SMAC_07512	0.286032	0.720787	0.329948	0.797179	-1.48594	0.0238156	0.372389	0.999874	0.235579	0.998971	1.78345	0.0104145	0.786481	0.756589	375.697	254.902	260.939	73.404	340.339	293.969	319.501	179.415	132.512	266.548
proteinId329044	PCON_03288	SMAC_01611	0.22519	0.442205	-0.39731	0.264263	1.23725	1.6324e-07	-0.318381	0.974838	-0.0934885	0.998971	1.17356	1.08937e-05	-0.0709572	0.963366	192.217	77.8897	126.797	183.094	76.9409	108.298	93.1507	22.6179	29.3311	33.8009
proteinId329049	PCON_14172	SMAC_02199	0.814398	0.0615356	-0.731807	0.179512	1.05254	0.00678692	0.295851	0.999874	0.393758	0.998971	0.725834	0.0917745	0.68867	0.583012	54.7109	17.5008	55.0745	97.7109	71.9229	65.8832	79.6055	136.846	109.423	91.1074
proteinId329070	PCON_13554	SMAC_03193	1.5957	0.0612169	0.827691	0.495756	4.15235	1.67045e-08	0.730538	0.999874	0.962136	0.998971	-1.04119	0.22904	0.289893	0.940935	47.4537	46.5417	85.4897	608.099	65.7945	43.5697	80.6379	99.6464	98.7374	21.0563
proteinId329108	PCON_08941	SMAC_05730	-0.621387	0.237858	0.516328	0.468391	-2.29323	1.79536e-07	0.446233	0.999874	0.407346	0.998971	-0.214574	0.701195	0.331034	0.847732	160.828	124.9	59.5937	23.1981	197.547	162.862	198.647	73.1241	70.8391	33.25
proteinId329117	PCON_06572	SMAC_08046	-0.382953	0.613268	0.277708	0.828568	0.529719	0.443943	-0.0308098	0.999874	-0.437833	0.998971	-2.64823	4.16539e-05	0.876951	0.675837	28.8505	18.8712	12.4041	40.3422	33.5264	38.6085	25.9356	273.404	162.019	12.3722
proteinId329128	PCON_02689	SMAC_04596	1.32643	0.0720516	0.174506	0.907333	0.900005	0.201051	-0.0266653	0.999874	-0.264441	0.998971	1.30199	0.0726918	-0.434058	0.867528	296.76	180.022	434.053	405.814	260.578	299.308	226.866	76.5739	136.975	193.7
proteinId329175	PCON_12215	SMAC_08688	1.51768	0.0272462	0.329414	0.789981	2.16374	0.000407227	0.0986437	0.999874	0.16373	0.998971	-3.01817	3.68172e-06	-0.565696	0.813004	41.6107	27.9757	69.6465	181.26	51.9978	54.6355	56.3911	108.767	193.69	13.1095
proteinId329181	PCON_04609	SMAC_06744	1.89961	0.00552687	-0.557783	0.607484	3.8734	8.44723e-11	0.431229	0.999874	0.244081	0.998971	-1.04478	0.142319	0.384736	0.8853	26.1604	9.46774	58.2743	418.255	45.8904	38.0256	41.6085	36.4825	33.6078	7.36763
proteinId329182	PCON_08898	SMAC_05070	-3.80188	2.19136e-13	0.51081	0.500974	1.45043	0.00200065	0.103114	0.999874	0.0576757	0.998971	1.03573	0.0475618	-1.09325	0.42573	80.0797	61.4244	3.0679	252.738	122.985	128.88	123.267	11.385	30.2556	34.9111
proteinId329188	PCON_04087	SMAC_01281	-0.0629272	0.939111	0.128762	0.927438	0.51514	0.449708	-0.676611	0.999874	-0.5069	0.998971	-2.79567	1.30751e-05	-0.510577	0.82846	151.011	88.8314	82.4317	143.466	76.8043	140.387	89.7058	52.4382	95.7622	7.35407
proteinId329190	PCON_10784	SMAC_07518	1.37648	0.00563684	0.588749	0.398593	-2.26947	5.06282e-07	0.414085	0.999874	0.65556	0.898761	3.23063	6.90198e-12	1.66625	0.0355095	80.0516	64.7389	119.2	7.73493	61.4942	51.8263	75.3418	178.745	60.84	325.173
proteinId329197	PCON_04673	SMAC_00126	-1.35623	0.0112701	0.248901	0.795865	0.402424	0.46112	-0.171254	0.999874	-0.238851	0.998971	-1.5428	0.00287861	0.510185	0.782175	48.3689	31.071	10.6136	64.09	53.3791	67.8333	52.6538	94.3309	75.7607	12.8381
[truncated: 3,183 more rows]
